# Supplementary material for: Lysosome activity is modulated by multiple longevity pathways and is important for lifespan extension in C. elegans
Source: eLife. 2020 Jun 2;9:e55745. doi: 10.7554/eLife.55745 (PMC7274789; doi:10.7554/eLife.55745)
Supplement: Figure 1—figure supplement 1—source data 1. [file elife-55745-fig1-figsupp1-data1.xlsx]

## Sheet: Figure1-S1E-Number in muscle
	Number of vesicular lysosome in the intestine
		WT																				daf-2(e1370)
	Day 1	17	12	14	18	10	16	21	16	11	17	17	11	11	15	8	9	8	10	10	8	11	19	20	14	27	26	23	23	6	11	21	10	9	16	20	17	14	25	11	15
	Day 3	7	11	13	16	9	14	7	7	8	15	12	6	9	10							15	12	17	17	23	16	8	10	11	20	24	31	33	14	12	17
	Day 5	7	13	6	8	5	11	5	8	7	10	10										9	12	13	9	11	17	15	13	16	12	24
	Day 9	6	6	5	10	8	9	5	8	7	7											11	23	18	16	10	8	19	14	20	36
			The numerical data are analyzed by GraphPad Prism 6 and represented as a bar graph in Figure 1-figure supplement 1E.

## Sheet: Figure1-S1F-Volume in muscle
	Average volume of vesicular lysosome(um3)
		WT																				daf-2(e1370)
	Day 1	1.27	2.04	1.67	0.9	0.86	0.79	0.91	1.54	1.27	0.98	2.22	1.11	2.08	0.71	2.07	1.5	1.45	1.29	0.88	2.89	0.88	0.84	0.85	0.92	0.88	0.73	0.94	0.68	1.26	0.64	0.76	1.57	0.68	0.72	0.53	0.56	0.97	1.21	0.8
	Day 3	1.56	1.05	1.94	0.98	1.72	0.91	1.73	1.47	1.34	0.98	1.05	1.41	1.45	1.6							0.65	1.05	1.3	0.95	1.39	0.75	1.33	1.22	1.19	1.12	0.93	0.69	0.9	0.57
	Day 5	1.23	1.12	1.54	2.68	1.35	1.98	2.01	1.88	2.15	2.38											1.34	0.69	0.94	1.49	1.66	1.08	1.7	0.71	0.64	0.84	1.37
	Day 9	2.14	1.41	1.69	2.39	2.1	2.58	2.93	1.86	2.22	2.01											1.52	0.79	1.33	0.75	1.08	1.08	0.97	1.66	0.87	0.67	0.93	0.68	0.63	1.12	0.94	1.62	0.77	0.56
			The numerical data are analyzed by GraphPad Prism 6 and represented as a bar graph in Figure 1-figure supplement 1F.

## Sheet: Figure1-S1G-Number in intestine
Number of vesicular lysosome in the intestine
	WT																							daf-2(e1370)
Day 1	25	20	12	16	20	16	18	28	20	16			14	16	21	11	22	18	24	17	23	25	30	8	13	17	15	21	15	26	18	12	13	7	14	14	13	19	13	13	10	18	16	12	24	24
Day 3	16	19	5	7	7	15	5	3	27	18	7	8	13	24	6	9	9	27	7					8	7	12	15	8	9	19	15	4	11	14	14	10	3	8	21	14	14	19	19	12	15
Day 5	5	7	13	9	7	9	10	12	13	7	6	8	9	5	17	8	3	11	19	4	4			11	12	9	14	7	16	11	8	19	16	9	8	20	9	7	16	8	9	11	10
Day 9	3	6	6	5	12	6	7	10	24	10	9	14	16	10	18	16	10							8	9	8	11	14	11	11	14	14	9	13	11	16	17	8	7	19	17	22	18	11	9	13
	The numerical data are analyzed by GraphPad Prism 6 and represented as a bar graph in Figure 1-figure supplement 1G.

## Sheet: Figure1-S1H-Voulem in intestine
Average volume of vesicular lysosome(um3)
	WT																							daf-2(e1370)
Day 1	4.18	5.22	8.23	4.21	5.89	6.8	3.79	2.42	4.35	5.28	3.02	3.33	7.12	4.13	3.88	6.57	4.25	4.47	3.15	5.14	4.1	3.98	2.77	8.85	4.83	3.82	4.57	4.41	6	3.79	5.7	5.99	7.68	10.71	4.89	5.44	4.11	5.79	7.41	4.25	4.15	3.83	5.95	7.24
Day 3	5.97	3.84	8.24	8.7	6.15	3.59	5.48	6.62	2.13	3.4	6.6	6.84	5.67	3.74	8.01	8.37	7.7	3.75	10.84					7.55	10.88	5.17	3.9	5.33	6.98	2.71	6.79	6.66	7.82	3.15	2.74	3.61	8.85	3.78	3.01	3.16	3.25	6.22	5.7
Day 5	10.31	10.16	4.84	7.42	10.22	6.58	11.34	8.21	7.09	10.14	10.06	7.17	7.85	9.42	2.63	5.77	10.86	3.61	4.56	10.31	8.35	2		9.93	5.88	4.84	3.53	6.53	2.64	6.01	5.65	8.38	4.2	8.83	6.42	5.41	7.15	8.85	3.62	6.42	8.92	5.65	6.05
Day 9	3.9	14.94	14.5	5.93	12.85	10.28	7.33	6.06	7.34	4.47	5.63	4.56												2.96	2.05	2.04	4.73	3.43	2.37	4.54	2.87	3.05	3.84	3.94	3.58	3.39	8.27	12.38	6.26	3.04	4.64	2.67	4.89	4.76	3.54	10.45
		The numerical data are analyzed by GraphPad Prism 6 and represented as a bar graph in Figure 1-figure supplement 1H.

## Sheet: Figure1-S1J-Cleaved CHERRY
			% NUC-1::CHERRY cleavage
			WT			daf-2(e1370)
			31.6675	42.7402	42.7402	76.5898	73.4449	59.5407
			The numerical data are analyzed by GraphPad Prism 6 and represented as a bar graph in Figure 1-figure supplement 1J.
