# Supplementary material for: Lysosome activity is modulated by multiple longevity pathways and is important for lifespan extension in C. elegans
Source: eLife. 2020 Jun 2;9:e55745. doi: 10.7554/eLife.55745 (PMC7274789; doi:10.7554/eLife.55745)
Supplement: Figure 1—source data 1. [file elife-55745-fig1-data1.xlsx]

## Sheet: Figure 1I-Length of lysosome
Length of tubular lysosome(um)
Day 1		Day 3		Day 5		Day 9
WT	daf-2(e1370)	WT	daf-2(e1370)	WT	daf-2(e1370)	WT	daf-2(e1370)
0	2.5	3.182	2.5	12.9402	2.5	9.3814	2.5
1.326	1.545	1.409	1.498	5.36	2.887	8.0362	1.632
0	2.233	2.2	4.207	5.1039	1.724	5.1088	1.513
0	2.637	1.808	4.584	4.7802	1.708	8.2735	1.605
0	1.866	1.726	3.419	4.1437	1.573	6.5947	1.955
0.1	2.045	2.89	2.593	5.7306	2.5	8.2377	1.866
0.1	1.184	2.5	1.929	5.5444	3.004	7.642	0.693
0.9	1.578	2.169	3.288	7.7466	1.705	7.5472	1.515
0	1.661	3.499	2.277	6.1774	2.443	6.4815	2.5			The numerical data are analyzed by GraphPad Prism 6 and represented as a bar graph in Figure 1I.
0	2.5	3.002	2.719	5.5317	1.705	6.4008	2.888
0	2.001	2.164	2.616	8.132	2.5	8.4528	4.231
0	2.391	2.5	3.581	5.7723	1.539	5.608	1.71
0	2.063	2.633	1.856	4.3324	2.273	7.1028	2.372
0	1.582	2.5	2.5	9.5005	3.017	6.6708	2.113
0	2.5	1.425	1.276	6.3008	1.696	5.3759	1.748
1.417	1.835	2.209	1.416	7.9831	1.289	6.7978	1.632
0	2.453	2.04	1.891	5.1894	2.182	4.9406	2.473
0	2.828	1.517	1.071	5.5471	2.152	9.5383	2.8
0	2.5	2.731	1.63	6.261	1.5471	6.3569	1.177
0	1.586	2.647	1.537	8.0399	2.05	11.8106	2.015
2	2.3854	2.1932	2.571	4.9193	3.662	4.1725	3.4176
0	2.7659	2.4207	2.3	6.2032	2.1932	4.6043	7.6026
0	3.0232	1.9799	1.9849	5.1478	3.3242	4.4721	4.5122
0	3.9319	2.642	1.8601	5.6859	2.4021	3.2802	5.374
0	2.7203	3.1575	2.3195	5.2555	2.1954	4.5277	6.5115
0.1	3.178	3.0017	2.01	8.9677	2.0025	5.9682	5.2
0.1	1.456	1.2728	3.0265	7	1.9105	5.001	3.6878
0	2.7074	0.922	2.8071	8.4	2.1932	4.7854	4.3863
0	2.2204	1.9723	2.9155	6.5146	3.3838	4.4822	4.7539
0	1.0817	1.4765	1.4765	4.7074	2.4698	2.642	7.6105
0	1.9313	1.8028	2.1024	6.6008	4.6487	4.826	4.6174
3	1.7692	2.0881	2.1024	6.9814	1.9698	3.8013	7.571
0	1.5232	1.2207	1.9416	5.8078	1.6	8.406	5.7689
0	1.9416	2.2472	2.0809	5.2953	3.9962	5.3	6.8469
0	2.0616	0.3606	1.3	4.9204	2.2804	6.2	6.0166
0	2.0224	2.5298	1.6279	3.4409	1.562	4.3566	5.3141
0	3.1575	1.3454	2.2627	5.7315	2.184	5.4009	4.8166
0	2.2804	1.3	1.9799	7.6059	1.6279	5.3254	6.7082
0	2.7295	1.253	1.5297	4.4777	2.0809	8.3487	5.8412
0	1.3416	1.9925	2.0881	6.3812	2.4187	6.14	7.7253
0	2.01	1.3454	2.7586	6.7231	4.7202	6.9893	4.6648
0	1.5811	1.5264	3.3526	4.776	4.02	7.2367	8.1437
0	2.6476	1.6125	3.4928	7.1176	3.7947	5.8258	4.4944
0	2.1401	1.3153	3.5341	8.3024	9.6664	5.5082	5.4332
0	2.2361	1.2207	1.9313	5.608	5.6036	4.7265	6.8411
0.1	1.9925	1.6401	2.0025	4.14	4.5695	5.0912	7.3239
0.1	1.5232	1.3153	2.1471	4.9254	4.5122	7.2498	5.3852
0	2.0616	1.1402	1.9698	4.9244	5.8	4.134	4.9396
0	2.184	1.3416	1.8	4.998	4.4272	4.8166	4.0497
0	1.6643	1.5556	3.0232	7.64	3.4928	5.5227	4.4721
0	1.9849	1.6553	2.9069	6.6008	3.3015	5.2839	3.2757
0	2.0025	0.9487	1.7493	3.5609	2.7785	5.2393	2.1095
0	1.6125	1.3038	1.4142	6.3781	3.5128	4.9729	1.8028
0	2.9155	1.7029	5.0359	3.8833	2.1	4.3139	3.2016
0	1.3416	2.3022	1.6763	4.1976	2.4166	5.0329	2.6833
0	2.5495	1.9647	1.6279	4.5011	2.2672	4.3829	1.8868
0	1.5811	0.8602	1.5033	5.5082	2.2361	9.2849	2.1471
0	2.3087	0.9487	1.6643	4.2202	2.2804	6.6242	0.922
0	2.0248	1.5297	2.2023	4.684	3.5014	8.4646	2.6306
0	1.1402	1.3454	1.6279	5.5	3.0806	4.9396	1.5264
0	1.2649	2.7074	1.5652	5.3075	3.9115	11.8929	2.6401
0	1.3601	1.6643	4	5.6586	2.9428	6.6483	3.5847
0	1.7464	2.6926	2.0518	4.8549	2.3601	11.2161	2.0616
0	1.2649	1.3601	1.7464	4.0706	3.1623	11.9633	1.063
0	2.6926	1.7	4.3267	2.9069	2.6077	12.3369	1.5652
0.1	2.3537	1.4142	2.1024	5.4342	2.5962	9.986	1.6155
0.1	1.7464	1.6492	2.6571	3.0887	2.126	15.3375	2.2361
0	1.9723	2.0248	2.7	5.6294	2	8.2219	2.126
0	1.9235	1.3601	1.8028	4.2942	2.7785	9.4021	1.7205
0	2.1932	2.0248	1.9209	3.5609	2.2672	9.683	1.7205
0	1.8601	1.4422	2.3022	3.9661	2.7857	15.8493	2.3087
0	1.7	1.4142	2.832	3.5777	2.4739	4.3909	2.5632
0	2.3345	1.8	2.4739	3.3615	1.9	5.8181	1.4866
0	1.3601	1.3454	1.7464	5.5317	1.6279	3.8288	2.1932
0	1.5297	2.0518	1.9698	5.7974	1.8788	6.5299	2.1587
0	1.5652	2.0248	3.9115	4.6872	3.7014	6.8184	2.3324
0	1.7029	2.1024	4.3566	4.1761	2.5612	5.4489	2.1471
0	1.9209	2.2361	2.9411	3.4928	1.9723	5.8052	3.7336
0	1.3601	1.4866	2.2561	3.3106	3.7108	3.454	2.7893
0	2.4166	2.5554	2.4166	3.4059	2.6926	3.5014	2.4331
0	1.7464	1.0817	2.3431	5.2612	2.3345	9.2574	2.0809
0	1.3892	2.377	2.3022	5.1039	3.0529	4.8021	1.3601
0	1.005	2.502	2.4413	3.2016	4.4922	7.1113	1.8439
0	1.6	1.3416	5.5082	5.2202	1.8439	5.1196	1.9209
0	1.9105	1.8868	3.5014	5.4009	2.8178	4.827	2.0025
0.1	1.2806	2.1633	2.9155	6.9116	2.6019	7.5802	2.4083
0.1	0.8062	2.0616	2.3087	6.5765	3.3541	6.2201	1.4142
0	1.2	1.7493	2.5	7.1701	1.9647	5.5902	2.7203
0	0.8485	2.1587	3.7121	5.2469	2.4839	6.0374	1.9647
0	1.3342	2.7295	1.9416	5.9034	2.3259	5.5227	1.7804
0	2.5554	1.4422	3.1906	6.2008	2.6019	3.891	2.6926
0	2.7	1.8601	1.9105	6.7602	2.5	4.9679	2.6571
0	1.2806	1.772	2.5807	4.3186	1.6971	5.4452	1.9313
0	3.048	1.5652	2.2091	6.1911	1.4142	8.2765	2.6926
0	1.5811	2.2361	5.0448	6.1911	4.02	5.0478	2.3431
0	1.6125	1.5297	1.9105	4.6174	1.5652	6.5307	2.126
0	1.6031	2.126	3.4176	3.761	2.3431	8.7092	3.3242
0	1.6279	1.6401	1.3416	4.6868	2.0616	6.1741	2.3345
0	3.4986	1.4318	3.4438	4.5074	2.2	8.5884	2.3022
0	1.2207	1.562	2.1378	3.4819	1.6763	6.5276	2.3087
0	2.4914	2.7299	1.1587	5.1904	2.7731	7.766	6.4303
3	1.8748	1.1045	2.3333	6.6024	3.4105	6.5105	1.5851
0	2.1028	0.5308	1.8314	3.5617	2.3968	6.8332	0.5938
0	1.2004	0.4541	1.4739	2.9404	3.3151	7.5763	4.7812
0	1.1126	1.0019	3.5387	3.0808	3.4206	7.5452	3.5404
0	2.0647	0.826	1.7971	3.083	2.2929	6.1733	1.9358
0	1.8715	0.4928	0.2685	7.1415	1.4418	6.8569	5.7006
0	0.7895	0.9447	0.9282	3.4008	3.4619	6.5844	5.5725
0	1.199	0.8325	0.9193	3.124	1.9085	5.3786	3.7897
0	2.3652	0.5948	2.1821	8.2503	1.6461	8.3709	0.2609
0	3.8846	3.2398	1.8877	2.304	1.2235	8.3148	0.5413
0	3.8637	0.8476	1.2056	2.1812	1.6566	7.0586	3.5742
0	1.803	1.1867	2.8259	5.3286	1.3765	6.4622	1.3721
0	3.7587	0.2168	1.5173	6.1352	2.1955	6.6173	2.07
0	4.1263	3.8867	1.3571	9.24357	3.0611	6.7201	2.6843
0.1	1.997	0.1813	1.1244	2.5202	6.9232	6.3342	2.9805
0.1	0.7671	2.3847	2.9968	6.6989	2.6496	6.8223	6.6865
0	0.8766	2.0886	1.8445	6.9231	3.5396	7.6037	5.2532
0	5.0563	3.1009	2.6187	2.4272	5.0116	6.7331	3.2357
0	2.2207	3.6838	2.3573	5.1229	5.5783	6.8408	5.1019
0	1.9741	1.5785	0.9352	8.6719	2.1576	6.4329	1.1427
2.447	1.8024	1.2546	0.9113	5.3648	1.2786	5.7497	5.453
0	1.917	5.2719	2.8873	2.4531	3.7627	7.334	6.4697
0	0.8707	2.0771	1.1551	3.41	1.1768	7.2908	1.6317
0	2.6	2.3938	2.4171	4.0934	3.7959	7.5384	2.0787
0	2.5469	1.7083	3.6776	1.9178	0.5783	6.9321	3.83
0	2.6462	2.8042	2.7814	1.8251	0.4849	7.6697	0.826
0	0.7487	0.6634	1.1524	2.2882	1.8571	6.1999	0.9121
0	1.714	3.6969	1.893	3.5294	3.3441	7.17	2.8314
0	2.2213	1.0384	0.2121	1.2011	1.9228	6.4552	5.6626
0	0.4982	2.2799	2.1084	3.3147	1.01	6.5865	2.6064
0	3.5195	5.2389	1.1248	4.3671	7.4668	5.9864	1.5632
0	2.0674	1.3899	3.001	3.1684	2.0285	7.5894	3.1849
0	2.1885	2.5837	1.6495	3.0088	1.9848	6.2205	2.8633
0	1.6916	1.7024	3.9878	1.8609	3.2425	6.969	2.2183
0.1	1.8638	1.3955	1.5613	3.9917	3.9401	6.8084	1.5433
0.1	0.8366	1.3529	2.2318	6.0972	3.0239	7.2067	2.7387
0	0.6377	1.0833	1.4584	4.9034	2.9483	6.5765	0.8722
0	3.9985	7.0996	1.7647	3.5919	2.2565	7.5631	3.5231
0	1.2492	3.9098	1.853	1.0346	2.6777	7.7675	2.5626
0	2.7361	0.7961	1.722	2.8271	0.9921	6.6287	0.5973
0	4.0141	3.551	0.8146	3.1176	4.0242	8.0127	2.6031
0	1.5629	1.539	4.5768	3.5653	1.1081	6.3298	2.9528
0	2.1959	1.2244	1.6018	2.2828	2.0858	6.2858	2.3958
0	2.3072	4.187	0.8792	2.6378	2.8668	6.232	3.1435
0	2.4184	0.3505	0.9464	1.0876	5.5736	7.5148	1.7619
0	1.8008	3.6132	1.6702	3.0197	2.3513	6.4608	1.0473
0	2.2238	2.8875	1.8821	4.2954	7.5127	5.8254	2.0152
0	2.3601	3.8361	1.4075	4.366	5.0268	8.2051	1.5406
0	3.5799	1.8783	1.4089	5.4251	3.468	8.167	2.0207
0	2.9102	3.6075	3.78	2.8048	0.9315	7.5589	1.2453
0	1.2148	4.9508	0.5339	2.5232	4.0078	8.3623	2.1341
0	4.6422	2.8544	1.7734	5.1473	2.995	6.6873	3.0676
0	1.3517	2.9573	2.182	3.9865	2.4347	5.5208	2.5662
0	1.1917	2.0381	2.803	1.8324	3.4853	8.2455	0.7108
0	2.1033	1.3672	2.1111	3.5777	1.556	6.6112	1.4712
0	3.5306	3.7716	4.2238	4.9548	4.1429	5.7785	2.7277
0	0.1993	4.4012	0.6107	4.2816	2.8694	6.7228	1.0376
0	1.0299	2.393	1.3084	4.2658	3.8753	7.093	2.0906
0	3.5494	1.1937	1.2931	7.2201	4.6549	8.4408	4.2362
0	2.0581	1.1302	2.6771	2.4073	6.4672	6.908	2.1298
0	4.3357	1.8337	2.3548	1.7696	3.8847	6.2581	4.6169
0	4.1764	2.6867	1.3853	0.6595	2.0646	6.6633	2.5268
0	0.9059	4.5864	1.1492	1.2695	5.2655	7.7708	0.7997
0	1.3455	1.3182	1.6792	5.9169	2.3045	8.2112	1.3132
0	4.8001	1.1244	0.668	1.575	3.8857	6.8804	1.8028
0	2.2782	1.358	3.7903	4.2754	3.1215	6.9674	4.5238
0	3.5974	5.4509	2.5716	2.5348	3.9549	6.7843	3.0722
0	2.7833	1.9578	0.5881	5.3836	3.4511	8.0243	4.6182
0	2.9716	1.885	2.6426	2.6768	5.7872	8.0035	2.0818
0	1.6595	5.212	3.1351	2.2112	2.2125	5.6498	2.2335
0	1.2119	1.8868	1.2064	5.4636	1.6812	6.56	2.406
0	4.7118	1.3387	1.2281	2.3994	3.1538	7.0602	2.4289
0	1.1567	0.9227	0.6879	4.8634	4.1517	5.5938	0.2411
0	2.3455	1.7549	0.1914	3	1.7862	6.9551	1.5804
0	2.0067	2.9779	3.0627	4.3136	2.2894	5.8546	0.847
0	1.8066	2.6908	1.3576	8.6928	3.4186	6.5147	1.8147
0	1.473	2.6087	3.9809	4.3732	3.9181	6.0948	2.5718
0	1.4571	2.5524	0.4134	3.0869	6.4928	5.674	2.3716
0	1.2719	2.1574	0.8113	5.282	5.0714	5.6599	1.1349
0	2.02719	0.3774	0.5	4.82	1.0667	4.734	0.471
0	2.3047	0.4674	0.5933	5.6422	1.5027	3.6739	3.543
0	2.3958	0.7333	1.0952	5.8486	1.6299	4.5667	0.333
0	2.3964	0.8545	1.4364	4.7308	1.7142	4.3667	0.667
0	0.8667	1.0488	1.4667	4.3702	2.2077	5.0636	0.867
0	1.3075	1.0533	1.4714	8.5053	2.2553	5.9664	0.5
0	1.3217	1.2346	1.5116	1.8397	2.9167	3.9333	1.583
0	1.6344	1.39	1.7333	4.5245	2.9333	5.1921	1.036
0	1.6355	1.5299	1.8184	4.4278	3.2	1.7179	4.333
0	1.6667	1.5333	1.8753	4.3691	3.408	5.4974	3.272
0	1.7	1.5611	1.9267	4.3732	3.4708	7.4333	1.667
0	1.7333	1.5667	1.9333	3.0869	3.8267	5.0333	1.149
0	1.8	1.5667	2.1432	5.282	6.333	5.6768	0.332
0	1.9333	1.7602	2.1667	4.82	2.0263	4.2154	5.667
0	2.0568	1.8333	2.3322	4.0333	4.1333	6.2	4.645
0	2.1667	2.0088	2.3714	3.7028	3.1552	6.4333	4.333
0	2.1698	2.1667	2.3933	5.437	2.2333	4.3481	3.272
0	2.1842	2.1762	2.6	2.8667	1.4	5.4944	1.667
0	2.2542	2.3833	2.6067	1.7417	2.325	8.1948	5.082
0	2.2667	2.4123	2.6333	3.2323	2.435	7.3184	5.667

## Sheet: Figure 1J-Lysosomal number
Number of vesicular lysosomes
	WT																																daf-2(e1370)
Day 1	45	31	37	44	38	34	50	39	43	26	22	23	30	38	36	40	25	27	27	21	25	35	30	32	34	32	37	36	33	43	36	44	88	64	65	56	50	69	59	74	56	47	49	50	41	42	48	56	69
Day 3	19	27	26	30	14	14	23	28	19	15	15	17	11	10	17	25	17	23	15	17	19	17	13	19	19	20	19	21	18	28	32	28	63	80	47	104	78	91	84	80	53	69	80	60	80	79	37	44	52
Day 5	13	13	12	12	8	11	9	8	3	7	4	6	9	8	10	12	7	7	5	8	10	18	8	13	10	11	9	10	15	9	12	10	63	63	66	74	52	95	67	68	67	58	53	59	72	54	65	84	62
Day 9	5	5	4	5	5	6	4	4	5	3	3	5	2	2	3	1	3	5	3	5	5	6	4	4	8	6	8	3	5	5	1	2	42	63	40	40	62	47	65	48	45	50	41	45	37	50	39	59	66
		The numerical data are analyzed by GraphPad Prism 6 and represented as a bar graph in Figure 1J.
[truncated: 15 more columns]

## Sheet: Figure 1K-Average voulme
Average volume of vesicular lysosome(um3)
	WT										daf-2(e1370)
Day 1	4.55	2.48	2.66	3.2	1.36	2.63	2.46	2.28	2.22	2.54	1.71	1.11	1.17	0.855	1.21	0.738	0.795	1.11	1.57	0.738	0.956	1.16	1.09
Day 3	1.82	2.44	2.27	1.79	1.4	2.13	2.64	2.15	1.99	2.44	1.27	1.58	1.24	1.16	1.28	1.24	1.4	1.3	0.941	1.54	1.28	1.15	1.15	1.06	1.5
Day 5	3.46	3.91	7.52	4.19	4.21	3.89	2.22	2.74	2.55	3.9	0.55	1.39	0.929	0.962	1.16	1.3	1.25	1.22	1.1	1.24	1.24	2.24	1.79
Day 9	3.42	2.52	3.63	4.64	7.02	5.33	2.3	3.39	2.67	3.95	1.24	1.13	1.45	1.52	1.71	1.84	2.02	1.21	2.12	1.09
	The numerical data are analyzed by GraphPad Prism 6 and represented as a bar graph in Figure 1K.

## Sheet: Figure 1L-Total volume
		Total volume of lysosome(um3)
		WT										daf-2(e1370)
	Day 1	36.42	24.77	37.23	25.61	17.71	31.56	29.47	25.08	42.9	35.75	70.1	38.84	51.35	49.6	70.28	45.76	56.41	51.94	56.69	47.99	58.33	56.91	45.99
	Day 3	25.47	46.29	67.98	28.66	28.08	17.07	44.48	50.8	48.9	43.2	67.28	33.11	38.59	47.4	39.54	57.06	46.24	45.35	53.63	56.97	35.98	40.12	49.63	53.02
	Day 5	159.11	140.76	248.28	213.5	190.58	230.5	168.5	150.8	189.4	200.5	51.1	51.94	47.38	81.96	43.84	56.41	49.43	55.91	53.27	65.95
	Day 9	118.49	116.1	159.86	189.6	200.8	210.5	195.8	180.8	210.6	228.5	55.83	42.93	41.98	40.98	56.52	53.49	84.83	45.15	55.13	33.67
		The numerical data are analyzed by GraphPad Prism 6 and represented as a bar graph in Figure 1L.

## Sheet: Figurn 1N-Person value
Pearson correlation coefficient
	WT										daf-2(e1370)
Larvae	0.6793	0.78321	0.80234	0.6683	0.75281	0.70893	0.80378	0.69832	0.65215	0.69032	0.679	0.70431	0.78042	0.80215	0.70125	0.607	0.752	0.728	0.695	0.8
Day 1	0.952	0.968	0.947	0.902	0.891	0.852	0.907	0.81	0.841	0.881	0.736	0.769	0.773	0.679	0.795	0.674	0.559	0.818	0.707	0.709
Day 3	0.931	0.936	0.843	0.955	0.944	0.965	0.95	0.829	0.965	0.95	0.576	0.659	0.553	0.665	0.832	0.523	0.623	0.726	0.678	0.703
Day 5	0.868	0.941	0.851	0.905	0.939	0.904	0.95	0.92	0.929	0.848	0.654	0.677	0.872	0.655	0.703	0.677	0.638	0.785	0.698	0.791
Day 9	0.972	0.895	0.881	0.929	0.933	0.918	0.92	0.915	0.935	0.947	0.757	0.74	0.66	0.797	0.7	0.563	0.793	0.696	0.789	0.761
	The numerical data are analyzed by GraphPad Prism 6 and represented as a bar graph in Figure 1N.

## Sheet: Figure 1O-Velocity of lysosome
		Velocity of lysosome(um/s)
			WT															daf-2(e1370)
		Larvae	0.182	0.259	0.111	0.365	0.191	0.221	0.462	0.158	0.269	0.308	0.212	0.35	0.344	0.328	0.22	0.285	0.198	0.281	0.158	0.459	0.352	0.251	0.476	0.183	0.208	0.21	0.214	0.35	0.205	0.348
		Day 1	0.0584	0.0456	0.0434	0.0634	0.0317	0.0526	0.0608	0.0187	0.0934	0.0879						0.434	0.264	0.244	0.153	0.2908	0.28805	0.13	0.117	0.181	0.159
		Day 3	0.0426	0.0232	0.039	0.044	0.0423	0.0135	0.0433	0.0331	0.0498	0.0444						0.113	0.115	0.3729	0.1548	0.222	0.2	0.312	0.139	0.2428	0.1729
		Day 5	0.0417	0.019	0.02	0.059	0.012	0.0366	0.0285	0.0233	0.0376	0.0335						0.225	0.171	0.406	0.134	0.107	0.167	0.132	0.131	0.314	0.233
		Day 9	0.0359	0.01663	0.0171	0.0111	0.01	0.0246	0.0139	0.027	0.0238	0.0275						0.1837	0.202	0.126	0.394	0.2996	0.168	0.325	0.241	0.431	0.227
		The numerical data are analyzed by GraphPad Prism 6 and represented as a bar graph in Figure 1O.
