# Supplementary material for: Lysosome activity is modulated by multiple longevity pathways and is important for lifespan extension in C. elegans
Source: eLife. 2020 Jun 2;9:e55745. doi: 10.7554/eLife.55745 (PMC7274789; doi:10.7554/eLife.55745)
Supplement: Figure 2—figure supplement 1—source data 1. [file elife-55745-fig2-figsupp1-data1.xlsx]

## Sheet: Figure2-S1C-LSG-LTR
			Relative intensity of LSG/LTR in hypodermis
			Day 1	Day 5
			0.94525	0.586903
			0.714748	0.431234
			0.675797	0.284122
			0.684688	0.227639
			0.778491	0.241226
			0.662173	0.2442	The numerical data are analyzed by GraphPad Prism 6 and represented as a bar graph in Figure 2-figure supplement 1C.
			0.633549	0.25166
			0.540718	0.677841
			0.762528	0.459654
			0.733557	0.618387
			0.875628	0.200397
			0.639779	0.125079
			0.747606	0.087935
			0.848706	0.516166
			0.843355	0.30579
			0.777004	0.468756
			0.809576	0.417737
			0.500804	0.573727
			0.532306	0.390203
			0.434217	0.445196
			0.387059	0.214244
			0.500804	0.33432
			0.532306	0.282344
			0.434217	0.342971
			0.387059	0.554106
			0.841439	0.185189
			0.555168	0.132584
			0.610687	0.213253
			0.966569	0.133425
			0.754858	0.220036
			0.731833	0.36444
			0.585397	0.362337
			0.664205	0.163751
			0.579539	0.142345
			0.388346	0.215752
			0.513618	0.213253
			0.493238	0.133425
			0.578186	0.220036
			0.421532	0.36444
			0.354514	0.362337
			1.13793	0.417741
			1.08081	0.435218
			0.982456	0.537845
			0.360321	0.470214
			0.289026	0.543308
			0.46049	0.393851
			0.288641	0.126209
			0.16916	0.188228
			0.363093	0.177172
			0.374468	0.212484
			0.488323	0.49794
			0.353635	0.392731
			0.318897	0.205686
			0.255247	0.382994
			0.571771	0.411484
			0.466792	0.37433
			0.64561	0.526685
				0.382263

## Sheet: Figure2-S1D Stained by LSG-LTR
			% of LysoTracker Red-positive structures stained by LysoSensor Green
				Vesicular lysosome										Tubular lysosome
			Day 1	100	100	100	63.64	66.67	88.89	100	46.87	62.5	100	N/A	N/A	N/A	N/A	N/A	N/A	N/A	N/A	N/A	N/A
			Day 5	0	0	50	16.67	54.54	62.56	58.33	0	38.256	0	0	0	0	0	0	0	0	0	0	0
			The numerical data are analyzed by GraphPad Prism 6 and represented as a bar graph in Figure 2-figure supplement 1D.

## Sheet: Figure2-S1K-Average intensity
	average intensity of NUC-1-sfGFP-cherry
	WT	daf-2	cup-5
	198.04	198.94	163.26
	135.03	170.59	192.7
	161.52	201.24	164.88
	161.94	174	149.18
	137.57	147.39	162.4
	204.53	157.47	218.41
	206.94	210.22	216.6
	156.74	178.53	131.16		The numerical data are analyzed by GraphPad Prism 6 and represented as a bar graph in Figure 2-figure supplement 1K.
	241.37	209.36	136.24
	221.67	145.69	224.75
	130.41	215.72	242.68
	241.79	164.36	111.69
	131.39	202.65	243.37
	230.86	166.59	206.32
	242.37	184.07	114.24
	133.07	197.24	114.09
	242.85	128.77	209.79
	145.33	137.43	132.93
	235.2	192.01	141.13
	245.06	123.47	136.46
	242.66	204.67	179.84
	242.68	202.37	185.24
	140.94	173.5	222.93
	238.13	227.82	237.78
	192.32	147.31	227.31
	234.98	187.17	230.63
	138.63	161.76	115.14
	204.54	189.84	224.13
	204.36	206.89	214.86
	159.59	203.96	207.84
	216.43	159.77	203.64
	228.66	192.63	127.37
	237.54	189.93	190.64
	226.43	204.12	201.89
	194.76	131.32	153.93
	223.97	195.02	170.65
	177.67	181.51	136.84
	209.63	193.13	148.36
	221.04	198.24	208.63
	219.42	213.7	149.75
	193.21	201.62	136
	226.63	211.38	219.38
	234.98	143.38	209.55
	240.41	185.01	230.4
	210.91	171.9	224.49
	181.32	172	181.09
	225.25	148.63	209.97
	226.86	201.86	215.25
	142	140.73	219.14
	243.24	160.85	221.29
	241.87	206.03	196.14
	239.35	197.67	223.84
	223.14	168.3	140.5
	215.09	181.3	146.7
	166.9	219.18	233.96
	137.79	193.84	132.18
	230	184.4	222
	202.62	149.81	219.04
	176.63	195.5	221.46
	158.58	200.04	152.5
	185.72	187.95	217.32
	205.81	163.25	165.82
	214.15	196.96	215.17
	145.53	203.43	116.57
	124.27	197.19	225.09
	203.44	204.57	116.27
	229	122.91	139.04
	205.25	224.11	117.58
	147.57	202.24	124.46
	163.43	189.94	221.39
	218.62	199.85	220.75
	134.73	200.93	197.83
	229.28	168.43	218.92
	207.69	181.81	215.61
	198.61	159.6	213.23
	236.61	207.38	215.94
	236.26	185.93	124.13
	150.23	166.81	178.66
	193.25	174.88	219.92
	242.07	196.71	223.32
	240.82	201.45	216.95
	236.55	154.4	192.15
	208.42	156.76	161.71
	220.92	205.05	166.83
	180.22	153.71	183.09
	240.58	143.68	204.17
	238.02	145.51	127.47
	242.37	206.42	204.88
	208.25	229.43	110.9
	240.34	153.83	208.01
	224.79	158.83	149.32
	211.88	192.53	145.33
	141.26	146.24	202.32
	150.4	183.95	144.31
	144.84	179.71	187.29
	200.06	168.54	230.08
	226.46	176.1	117
	221.55	172.34	121
	189.12	207.81	125.9
	161.1	175.89	111.4
	222	210.55	214.9
	201.03	204.74	187.92
	134.58	195.25	220.75
	163.64	146.38	195
	239.67	196.31	149.17
	218	223.61	233.4
	197.8	201.52	241.3
	167.23	215.73	213
	235.41	188.86	227.09
	176.21	176.34	193.83
	186.32	196.08	228.9
	234.67	198.13	227.09
	238.8	193.42	245.48
	191.45	193.95	211.14
	202.14	158.86	146.89
	125.6	195.05	240.68
	240.21	134.86	203.59
	231.54	149.32	183.52
	234.21	172.78	200
	160.03	223.53	229.55
	237.59	209.15	224.88
	204.41	213.93	203.79
	192.06	165.4	230.5
	157.87	205.03	225.4
	200.82	155.61	217.48
	203.75	166.43	215.96
	238.12	193.58	238.3
	241.01	207.59	145.96
	189.35	211.58	229.77
	129.56	157.69	237.86
	226.44	200.27	242.12
	214.24	142.25	129.91
	205.42	187.82	214.34
	238.26	192.57	241.18
	225.03	163.06	229.06
	240.49	168.23	206.76
	238.05	188.76	194.38
	232.41	180.73	233.49
	242.51	165.17	236.67
	237.77	193.67	204.71
	206.21	201.57	240.7
	203.24	176.19	228.94
	236.39	177.26	207.94
	242.75	190.17	245.05
	238.29	212.07	236.88
	172.06	208.34	227.35
	195.71	190.63	220.52
	239.4	172.36	229.93
	222.2	200.28	234.51
	242.57	163.85	238.47
	142.29	186.08	161.38
	223.45	208.4	221.42
	238.07	226.96	185.95
	185.21	139.08	163.41
	162.43	229.3	139.07
	161.67	182.79	228.23
	205.45	225.76	157.68
	220.42	149.43	121.72
	196	181.52	220.75
	165.63	207.59	219.83
	220.91	204.96	142.92
	222.16	226.45	234.89
	177.94	215.48	209.8
	221.33	231.1	192.33
	206.27	211.12	168.38
	137	230.04	119.92
	153.33	209.86	236.39
	204.17	219.91	125.11
	234.38	220.59	187.11
	177.32	229.05	236.36
	212.02	223.16	118.16
	222.57	226.48	138.38
	201.1	218	192.91
	233.96	204.21	189.29
	204.04	222.15	133.44
	167.45	238.97	133.88
	242.21	224.05	207.37
	164	180	138.21
	233.38	235.75	188.15
	238.9	199.1	179.65
	240.91	209.47	222.16
	222.56	238.36	168.29
	146.97	210.07	192.74
	196.71	173.91	136.6
	137.67	224.9	218.84
	232.01	226.97	219.38
	230.14	228.61	222.69
	144	189	231.17
	226.43	183.58	171.37
	169.37	199.91	197.42
	232.93	194.5	245.61
	240.28	188.46	162.12
	226.18	176.25	240.59
	241.59	160.24	227.79
	238.95	183.1	181.54
	238.39	188.85	140.06
	134.62	170.8	221.14
	244.73	176.16	232.3
	240.89	174.79	245.92
	242.87	155.91	233.89
	167.31	204.88	235.91
	241.37	209.69	190.73
	211.83	209.33	240.55
	236.55	186.45	236.76
	217.6	176.42	128.57
	165.66	183.66	241.7
	229.89	183.88	230.86
	172.96	211.77	226.18
	223.73	145.5	234.36
	242.09	133.83	240.58
	232.53	178	238.28
	202.5	160	235.19
	234.66	189.6	244.82
	220.91	175.21	238.47
	192.1	207.15	240.62
	240.12	179.36	229.38
	215.27	165.29	228.47
	241.61	225.75	234.31
	198.74	201.32	222.82
	159.7	171	212.79
	237.84	175.92	234.48
	237.24	207.36	199.97
	229.13	121.5	202.91
	240.56	173.56	180
	240.36	206.21	216.85
	222.72	203.22	170.35
	243.27	173.71	233.72
	229.74	164.57	232.94
	160.7	193.33	150.15
	228.98	155.68	236.72
	224.26	192.64	190.88
	239.54	199.62	224.28
	233.37	187.02	225.79
	224.74	182.17	214.41
	241.5	198.88	223.31
	223.56	217.86	226.95
	228.34	120.78	171.9
	231.6	125.2	240.77
	185.88	217.55	239.72
	216.41	194.09	237.12
	229.75	195.83	234.82
	219.03	181.31	212.46
	210.33	203.72	242.18
	216	198.31	228.83
	140.5	186.41	223.76
	139.27	132.92	224.06
	192.23	151.22	221.57
	174.17	191.4	233.26
	174.65	210.13	143.25
	206.24	159.71	222.36
	226.59	132.47	203.85
	219.03	185.09	211.78
	164.36	144.33	242.37
	223.22	192.92	207.76
	201.55	231.33	208.5
	225.43	185.07	211.84
	206.2	186.17	209.59
	221.41	221.88	226.4
	236.25	167.77	217.89
	231.79	223.75	209.96
	216.68	146.07	208.02
	235.63	148.5	220.27
	230.18	170.3	226.15
	220.44	182.14	235.2
	192.52	209.89	221.89
	234.23	182.77	224.88
	231.29	178.64	233.75
	191.72	203.94	212.54
	233.73	142.59	215.91
	241.56	141.98	231.31
	219.14	181.37	168.79
	135	146.7	228.04
	238.03	137.71	236.38
	237.17	207.7	229.32
	237.74	155.75	197.76
	229.98	155.33	169.41
	214.87	165.74	234.11
	226.54	192.79	222.98
	238.46	145.75	229.56
	205.88	178.33	183.07
	237.18	174.96	219.7
	236.74	163.5	189.91
	235.47	199.38	224.24
	219	151.62	170.43
	232.78	147.26	215.96
	238.4	143.19	180.91
	200.59	157.85	212.29
	234.07	187.24	199.56
	207.14	176.01	238.7
	213.95	166.37	131.84
	236.09	199.89	223.63
	236.74	170.21	242.3
	239.02	156.46	209.71
	220.37	132.13	227.17
	200.22	194.81	236.07
	222.46	133.84	228.98
	147	176.58	189.06
	172.13	178.68	224.89
	234.62	185.24	142.64
	241.15	162.06	224.73
	238.3	130.24	199.11
	222.96	143.03	205.29
	220.38	189.6	236.49
	141.5	126.4	197.63
	128.08	205.03	214.43
	210.5	205.34	157.5
	203.27	146.06	235.68
	221.25	143.48	218.72
	207.38	150.18	215.57
	142.69	165.53	189.46
	207.83	214.09	230.25
	226.58	238.48	230.72
	221.22	228.33	174.58
	201.24	217.47	154.36
	225.47	233.83	189.78
	221.14	167.33	132.79
	210.57	233.95	150.33
	189.81	216.71	227.13
	200.22	216.52	228.73
	143.46	218.44	194.93
	174.4	219	212.52
	201.66	215.42	234.64
	208.78	186.12	169.36
	246.38	194.24	224.43
	130.68	173.55	218.16
	173.38	228.33	152
	226.04	217.47	218.13
	194.93	233.83	183.26
	212.33	167.33	210
	229.32	233.95	127.26
	169.77	216.71	177.69
	207.83	216.52	214.02
	234.33	218.44	182.04
	235.03	219	200.32
	192.62	215.42	232.19
	218.31	186.12	227.24
	220.3	194.24	230.84
	183.35	173.55	216.63
	196.1	217.13	146.09
	219.47	225.53	175.07
	189.67	221.55	220.64
	144.94	228.46	231.26
	226.07	196.61	217.47
	182.33	150.18	173.82
	193.1	165.53	165.77
	235.39	214.09	204.67
	199.93	238.48	223.88
	160.76	196.87	222.24
	186.66	125.09	208.71
	231.8	120	197.07
	205.99	189.75	232.05
	237.96	136.58	233.52
	215.7	174.16	196.95
	212.03	134.92	221.79
	205.43	167.78	220.45
	229.4	120.97	218.91
	230.82	152.63	172.69
	230.52	196.73	191.72
	243.63	121.23	166.27
	173.4	142.45	180.73
	194.84	213.5	219.31
	226.46	214.3	211
	243.72	202.45	214.55
	231.57	149.63	139.06
	239.73	196.27	169.68
	214.21	193.7	209.18
	234.2	181.45	214.04
	209.5	222.59	175.83
	230.39	226.96
	231.68	227.76
	225.9	175.5
	227.83	208.33
	234.48	229.81
	223.24	213.25
	221.22	233.38
	243.3	196.38
	215.97	240.39
	229.41	238.5
	231.09	239.92
	119.2	218.49
	185.88	167.94
	210.11	238.26
	176.9	224.02
	210.3	241.65
	187.65	244.93
	183.68	239.38
	117.88	230.95
	163.35	248.71
	159.68	245.15
	202.21	228.4
	134.61	197.96
	122.09	235.18
	162.29	238.96
	181.57	235.5
	225.59	231.05
	214.36	212.36
	166.55	242.6
	174.8	237.4
	180.4	214.54
	127	222.32
	212.94	224.38
	189.28	240.36
	135.68	230.67
	131.34	236.4
	187.74	230.55
	151.78	221.76
	190.44	238.29
	213.58	224.82
	206.07	229.25
	111.43	217.51
	202.75	226.48
	180.81	244.4
	151.16	244.28
	219.07	239.31
	153.64	217.87
	173.15	239.57
	149.31	231.24
	111.63	234.6
	142.81	240.83
		208.34
		194.14
		243.67
		240.45
		184.38
		238.92
		212.27
		232.38
		222.8
		231.79
		245.04
		243.99
		228.17
		241.27
		239.11
		232.22
		237.17
		228.69
		236.48
		207.98
		224.44
		227.53
		238.91
		219.22
		198.53
		221.7
		242.38
		233.83
		238.23
		241.7
		237.36
		227.47
		249.57
		230.99
		232.14
		199.5
		221.06
		238.27
		241.76
		243.42
		236.1
		225.7
		240.68
		232.53
		215.05
		243.94
		245.05
		212.23
		223
		227.82
		227.77
		235.54
		229.7
		245.91
		248.08
		237.34
		236
		240.11
		240.54
		238.24
		236.63
		240.38
		183.11
		227.54
		186.05
		246.76
		223.5
		244.35
		239.34
		237.5
		236.76
		247.58
		240.17
		231.56
		223.08
		228.67
		221.22
		247.44
		244.42
		232.88
		234.38
		229.71
		245.61
		227.34
		225.27
		222.99
		237.71
		217.33
		248.13
		242.94
		238.23
		196.69
		242.52
		227.05
		219.82
		230.17
		235.34
		238.47
		240.76
		231
		239.45
		196.33
		224.38
		219.89
		229.53
		204.38
		196.94
		229
		219.53
		236.4
		224.11
		233.43
		237.72
		209.2
		199.32
		221.86
		219.82
		169.16
		217.53
		227.41
		221.23
		156.68
		239.48
		227.79
		233.33
		236.86
		157.3
		211.38
		230.23
		233.09
		225.95
		184.86
		217.51
		237.09
		171.16
		137.56
		217.45
		230.92
		225.55
		237.67
		236.18
		246.46
		226.57
		199.52
		222.91
		235.75
		226.54
		223.5
		227.28
		201.59
		217.95
		239.92
		223.91
		187.87
		233.51
		191.33
		158.5
		193.56
		202.23
		223.78
		220.18
		197.54
		143.53
		186.76
		175.77
		224.92
		221.36
		194.25
		153.17
		200.36
		206.55
		220.63
		225.12
		178.58
		232.08
		152.73
		212.86
		218.23
		183.25
		199.98
