# Supplementary material for: Lysosome activity is modulated by multiple longevity pathways and is important for lifespan extension in C. elegans
Source: eLife. 2020 Jun 2;9:e55745. doi: 10.7554/eLife.55745 (PMC7274789; doi:10.7554/eLife.55745)
Supplement: Figure 2—source data 1. [file elife-55745-fig2-data1.xlsx]

## Sheet: Figure 2I-LSG-LTR
			Relative intensity of LSG/LTR in the intestine
			WT Day 1	daf-2 Day 1	WT Day 3	daf-2 Day 3	WT Day 5	daf-2 Day 5	WT Day 9	daf-2 Day 9
			0.989346	1.91867	0.901181	1.52338	0.489488	1.58206	0.437677	2.99766
			1.27862	2.17538	2.00889	1.24521	0.603187	1.94157	0.596708	1.2324
			1.46208	1.7682	1.8165	1.17336	0.585533	1.8382	0.447877	1.44967
			1.54251	2.37502	1.18799	1.10625	0.64121	1.18081	0.500634	1.35513
			1.12203	1.94899	1.27421	0.962948	0.701848	1.77303	0.657378	1.23944		The numerical data are analyzed by GraphPad Prism 6 and represented as a bar graph in Figure 2I.
			1.19156	3.13161	2.48681	0.89028	0.580037	1.39196	0.639918	1.21534
			1.02955	3.17387	0.87029	1.00934	0.617237	1.99059	0.768987	1.50844
			1.13156	2.51316	0.93909	1.08545	0.73653	2.0034	0.698645	2.10374
			0.966922	2.47697	1.86337	0.72061	0.725179	1.77958	0.561697	1.70863
			1.2402	2.40612	1.12467	1.51485	0.684942	2.50249	0.688385	1.13827
			1.31385	2.84845	1.25672	0.858792	0.675831	1.5493	0.70275	1.88205
			2.27947	2.78469	1.18185	0.78125	0.603154	1.70218	0.471181	1.67241
			2.65258	3.50457	0.970974	0.954751	0.759123	2.23023	0.458346	1.1774
			2.47785	2.91181	1.14757	0.776033	0.51591	1.74528	0.578652	1.39197
			1.63014	1.99615	1.75739	0.869461	0.694833	1.36801	0.660421	1.433
			2.33323	4.58263	1.64071	0.931692	0.501255	1.79821	0.521796	1.70758
			1.33661	3.39511	1.62115	0.566637	0.493336	1.89778	0.495412	1.81901
			1.90866	3.06148	1.68766	0.524973	0.541118	1.78937	0.615962	1.31226
			1.52178	3.3017	1.3483	0.867944	0.548431	2.04164	0.523321	1.51348
			2.76041	3.03465	1.14857	0.696817	0.625554	1.43417	0.531838	1.73254
			2.15854	3.517	2.0789	0.678108	0.620199	1.41958	1.0206	2.10384
			2.08729	1.98242	1.44433	0.56048	0.628909	1.89014	1.02425	1.87467
			2.33248	2.08934	1.37682	1.12484	0.877172	2.45516	1.31881	1.66657
			3.29136	2.31171	1.50622	0.625652	1.48902	2.5256	1.05767	1.54054
			2.41789	2.14632	1.05763	1.06122	1.98463	1.05978	1.11915	1.31568
			3.12098	2.25843	1.73313	1.15326	1.89959	1.87284	0.999806	2.17523
			2.79386	2.22677	1.0499	1.48027	1.89166	1.59065	1.02457	1.18118
			2.82918	1.62773	1.23743	1.31167	1.42922	1.1885	0.917355	1.76172
			2.45915	1.91998	1.47653	1.08545	2.65572	1.81287	0.808177	1.2456
			3.21856	2.20972	1.11015	1.6575	1.64597	1.24506	1.03225	2.52436
			3.39731	2.1773	1.28905	1.25727	1.8131	1.29593	1.0501	2.35496
			3.36443	1.75947	1.21235	1.5317	1.26445	1.86737	1.06124	1.90507
			2.6228	1.90845	1.17318	1.19087	1.45145	1.32398	1.08123	3.02633
			2.08748	3.15271	1.68152	1.46129	2.00994	1.57002	1.05757	3.5475
			2.70311	1.93888	1.022	1.46467	1.57114	2.55308	0.84648	2.32662
			2.32262	1.84301	1.18188	1.16192	1.87252	1.38006	1.01769	2.40066
			3.71847	1.98578	1.06035	1.11059	1.87721	1.46127	0.828952	4.72114
			2.35919	4.15087	1.49308	1.22082	1.17326	1.65054	0.842116	2.97189
			2.51024	2.14835	1.10771	1.17958	1.24644	2.98632	0.913962	2.53382
			2.93955	1.91802	1.96178	0.913043	2.37374	2.00504	0.999594	3.81365
			2.21074	1.93652	1.54532	1.05984	2.03938	1.27124	0.915987	3.35113
			2.53604	2.04813	1.62295	1.11434	2.14696	1.34402	1.04286	2.31841
			2.09818	1.93127	1.50678	1.24943	1.05367	1.51877	1.07903	2.54831
			2.55005	2.07174	1.31799	1.56666	1.92374	2.18686	0.765714	2.69496
			2.10231	1.81892	1.36952	0.837182	1.80516	1.4817	0.952751	4.23958
			1.69167	4.44231	1.29375	0.857294	1.56803	2.00581	0.785787	2.71103
			2.00266	1.80818	1.02483	1.44339	1.71125	1.94572	0.989169	2.09149
			2.6507	2.70275	0.935886	0.823616	1.17267	1.35491	1.18375	2.94198
			2.37348	1.88994	1.48967	0.805258	1.35261	1.97974	0.827998	4.09628
			2.21266	2.37212	1.7513	1.03319	1.08779	2.65012	0.87173	3.40318
			2.51699	2.15957	0.971266	0.930877	1.64444	3.6305	1.22351	2.60151
			2.24375	1.98592	1.45469	1.34976	1.47822	3.29671	1.43121	2.48487
			1.2366	2.15937	1.52869	1.09902	1.10233	3.51842	0.918771	3.51809
			1.7133	1.68789	1.22558	1.81719	0.714572	3.25469	0.795196	1.86338
			1.54531	2.06128	1.5036	1.08343	0.607572	3.10117	0.989274	2.47216
			1.46643	2.37058	0.955098	1.12129	0.675882	3.16804	0.8324	3.29104
			1.49853	2.33816	1.01223	1.34464	0.72192	3.4793	0.855488	2.05806
			1.62843	2.04406	0.949473	0.850889	1.13938	4.21962	1.1639	3.8494
			1.23712	1.88555	1.77582	1.01706	0.785548	2.96974	0.826928	2.82528
			1.58503	1.69318	0.974934	1.17707	0.744457	2.98668	0.811098	3.29698
			1.48856	1.78503	0.954346	1.8006	0.782333	4.1867	1.03027	2.77954
			2.33323	1.53559	0.976476	1.439	0.702439	2.98502	0.834658	2.45354
			2.77858	2.41667	1.58975	1.11164	1.693	2.27967	0.882283	2.3706
			1.78138	4.84931	1.527	0.87497	0.680921	2.9882	0.897109	4.61171
			2.17381	3.61845	1.42465	1.05076	0.789045	3.02601	0.858082	3.67442
			3.1296		1.31212	2.53153	0.71826		1.0265	2.37955
			2.55617		2.01966	0.741152	0.678187		1.0214
			2.38562		1.53049	1.33729	0.776892		0.900809
			1.85694		1.81752	0.803282	0.717905		1.34164
			1.79802		1.82102	1.49474	0.721429		0.995312
			1.90347		1.70985	1.73684	1.16708		0.961071
			3.28729		1.56721	1.25148	1.03525		1.09397
			3.58578		1.36641	7.41549	0.619163		0.885052
			3.18098		2.15909	1.14325	1.312		0.852749
			2.89428		2.5062	1.17961	1.39359		0.858065
			2.276		1.50716	1.8433	0.803935		1.37997
			1.60693		1.79771	0.746751	0.818125		0.968407
			2.99974		1.582	0.722237	1.18851		1.32587
			2.12157		1.7417	0.90706	0.66991		1.1045
			2.99302		1.36544	1.622	0.863094		0.97325
			1.59137		1.58905	1.03768	0.844619		1.01599
			1.65773		1.70403	1.38607	0.773046		1.06991
			1.38496		1.62545	1.44348	0.791471		0.979291
			1.5844		1.3729		0.785351		1.02962
			3.26316		1.561	1.74358	0.879062		1.16914
			2.24003		1.74839	1.28869	1.14164		0.938063
			2.24991		1.58298	1.56952	0.607077		1.40174
			2.45252		2.21007	1.33129	0.875121		1.34293
			1.34189		0.941277	1.52509	1.32531		1.13773
			1.65579		1.58877	1.42227	0.730448		1.41367
			1.65847		1.4503	1.58292	0.790728		1.51202
			2.88795		1.01349	1.63596	0.914265		1.17769
			1.44262		1.137	1.21166	1.05901		1.708
			1.45359		1.72427	0.976173	0.910903		1.28588
			2.30073		1.30928	1.28276	1.10909		1.27167
			3.48571		0.980435	1.28118	0.875966		1.49985
			2.05872		1.91755	1.09799	0.807269		1.49517
			1.90909		0.918991	1.16921	1.25356		1.3498
			1.77125		0.871199	1.31438	0.793545		1.9629
			2.11218		1.06935	2.12077	0.928278		2.09347
			1.46435		1.25071	1.03365	0.749699		1.56927
			1.50697		1.24402	1.52987	0.906856		1.49132
			1.20838		1.97924	1.49614			1.18393
			2.416		1.42706	1.23243			1.34977
					1.39674	1.79814			1.83857
					1.2302	1.42645			1.4899
					0.948731	2.13371			1.72579
					0.872453	1.86976			1.16404
					3.69298	1.08803			1.62271
					0.90469	1.42589			1.36723
					1.09083	1.38643			1.71631
					0.912336	1.07736			1.43185
					0.947607	1.40836			1.72528
					1.00456	1.29937			1.20536
					1.39073	0.808142			1.26868
					1.46694	0.826582			1.84625
					1.26226	0.801676			1.36546
					1.36595	0.894828			1.91294
					1.74519	0.934689			1.30171
					1.68358	1.02319			1.40638
					1.35634	0.906192			0.661111
					1.51636	1.05943			1.25358
					1.80491	0.883629			0.880673
					1.39247	1.00909			0.776273
					1.40468	1.24785			0.936694
					1.38077	0.938627			0.694532
					1.25826	0.899011			0.665009
					1.54685	0.927258			0.97997
					1.445	0.797056			0.779647
					1.37292	1.1239			1.15571
					1.50651	1.39863			0.841354
					1.73406	1.22704			0.929131
					1.66804	1.4269			1.41159
					2.08758	1.03347			1.18374
					2.33878	0.861079			0.890809
					1.99481	1.12678			1.10801
					0.529076	1.11882			1.00152
					0.626078	1.26026			1.38461
					0.625097	0.784643			1.18384
					0.548255	1.12891			1.02299
					0.595204	1.01527			1.58807
					1.0185	1.0012			1.41961
					0.562293	0.941358			0.843965
					0.653536	0.752295
					0.928549	0.849131
					0.656614	0.834714
					0.608868	0.757103
					0.666518	0.629986
					0.722314	0.653944
					0.746522
					0.515965
					0.85577
					1.17809
					0.80678
					1.00465
					0.647013
					0.646911
					0.681209
					0.748926
					0.748654
					0.954387
					1.32886
					0.965629
					0.83091
					0.867515
					0.849231
					0.811127
					0.526066
					1.53143
					0.652145
					0.752286
					0.834653
					1.04918
					0.730881
					0.75472
					0.624717
					1.03911
					0.971182
					0.799208
					0.707099
					1.13641
					0.680239
					1.16283
					1.09434
					0.762501
					1.18996
					0.957986
					1.39087
					0.937686
					0.913859
					0.646551
					0.768495
					0.933555
					0.940506
					0.6888
					0.858883
					0.981973
					1.01036
					0.818133
					1.15405
					1.19782
					1.30853
					1.28328
					1.40534
					1.46139
					1.10156
					1.59272
					1.53127
					1.41163
					1.64908
					1.64736
					1.25167
					1.49303
					1.13167
					1.15957
					1.67331
					1.51258
					1.46114
					1.4985
					1.41023
					1.01808
					1.94803
					1.34274
					2.07721
					0.838764
					3.69082
					1.99659
					1.36496
					1.32326
					1.03802
					1.83524
					0.977514
					1.33435
					1.38859
					1.04366
					2.21297
					1.19042
					1.17196
					2.12936
					1.12378
					1.84735
					1.48538
					0.917649
					1.18386
					0.87954
					1.07741
					0.842727
					1.40678
					1.27173
					1.36851
					1.14354
					1.10793
					1.46014
					1.41518
					1.68413
					2.02792
					1.02242
					0.969658
					1.16934
					0.827669
					1.28943
					1.84474
					1.29282
					0.932611
					1.23622
					1.21476
					1.23634
					1.01405
					0.906575
					1.41205
					1.01542
					1.11547
					1.73801
					1.09123
					0.823519
					0.791304
					0.930438
					0.502736
					0.56174
					0.87208
					0.658024
					0.687516
					0.712457
					0.970387
					0.82821
					0.83897
					0.860708
					0.813687
					0.751581
					0.91431
					0.761517
					0.840986
					0.574228
					0.62321

## Sheet: Figure 2M-pHtomato
		Average intensity of pHtomato per lysosome
		WT	daf-2(e1370)	cup-5(bp510)
		38.22	80.37	96.44
		54.41	70.33	96.04
		34.45	53.75	99.96
		37.75	40.67	92.6
		47.62	45.05	95.08
		42.21	60.72	143.91
		45.01	67.94	118.79
		33.83	56.48	141.57
		35.4	50.42	126.66		The numerical data are analyzed by GraphPad Prism 6 and represented as a bar graph in Figure 2M.
		71.74	72.24	199.58
		36.76	82.26	115.11
		35.83	52.89	124
		47.32	48.15	104.33
		39	67.29	146.74
		36.42	84.72	146.45
		42.54	97.96	141.04
		40.93	46.45	133.48
		34.29	44.92	150.45
		37.87	73.57	107.65
		55.78	74.95	149.88
		42.26	53.34	155.84
		68.14	44.68	152.49
		73.52	39.3	179.83
		87.17	66.4	138.06
		53.3	103.87	121.35
		85.56	69.62	96.06
		36.56	52.8	108.8
		34.92	107.83	150.56
		42.42	50.82	106.03
		51.08	55.84	149.92
		39.46	78.99	106.31
		90.62	52.14	113.17
		49.18	62.41	118.67
		35.93	56.68	151.83
		38.85	54.69	198.13
		39.84	80.75	158.83
		39.01	76.96	91.15
		41.98	45.4	85.55
		42.42	51.38	84.94
		55.61	88.58	164.55
		38.48	90.51	127.43
		40.39	51.54	197.47
		41.82	61.96	109.06
		49.41	48	138.46
		37.73	49.29	97.1
		33.7	58.36	98.46
		57.66	98.23	127.38
		34.46	44.69	125.23
		43.33	55.72	102.29
		45.19	75.25	199.11
		37.24	69.54	160.3
		56.76	80.95	113.06
		34.09	41.77	122.97
		34.44	66	155.48
		37.79	59.4	146.46
		40.71	123.16	162.54
		93.83	68.6	93.92
		79.74	64.75	115.07
		95.49	47.65	140.01
		66.18	54.27	93.41
		62.14	47.08	155.04
		81.44	51.49	112.25
		100.7	122.89	93.83
		77.48	82.14	82.39
		68.71	75.78	74.95
		83.43	58.92	63.29
		60.83	45.39	66.58
		58.46	69.19	155.71
		61.67	66	85.21
		74.23	90.12	75.53
		64.1	80.1	70.71
		63.91	49.77	86.96
		69.18	45.71	141.05
		100.97	58.84	158.16
		74.28	40.58	91.12
		58.31	54.05	117.68
		63.57	51.75	79.74
		76.2	54.91	68.24
		57.46	48.29	105.41
		63.69	87.51	86.11
		65.73	51.86	100.9
		62.18	44.25	67.25
		61	47.02	84.86
		84.74	40.8	123.2
		76.21	82.13	74.44
		62.38	50.67	91.79
		73.87	50	70.9
		117.62	66.67	67.06
		70.66	48.7	99.66
		105.89	48.36	69.4
		151.89	55	122.07
		63.09	42.3	101.68
		78.47	66.47	107.3
		56.92	44.21	77.12
		69.96	44.62	122.79
		129.7	40.58	94
		60.15	45.92	100.64
		100.82	43.61	69.11
		70.24	60.93	70.16
		111.9	54.54	108.72
		123.85	41.8	73.46
		151.62	61.79	69.69
		66.2	107.86	133.12
		91.05	54.43	85.65
		97.56	66.13	140.11
		58.82	47.96	60.6
		75.54	85.88	77.04
		71.04	49	70.09
		102.32	56.93	73.04
		63.79	43.93	83.54
		61.89	52.79	65.02
		67.89	70.65	83.6
		80.65	83.03	76.69
		63.28	54	74.92
		64.91	109.17	84.84
		143.7	63.37	72.68
		73.79	52.49	97.91
		66.95	59.33	77.25
		83.85	57	97.51
		74.39	42.76	94.6
		71.76	61.88	83.47
		27.23	94.35	136.15
		24.43	49.42	89
		25.52	97.73	108.59
		39.04	64.35	107.71
		20.94	47.5	77.84
		41.7	83.89	107.37
		21.55	57	111.27
		34.4	72.42	88.88
		21.2	45.64	76.33
		30.38	69.24	184.48
		24.8	44.5	107.31
		23.13	48.1	90.13
		24.86	62.58	94.18
		75.61	73.73	74.11
		24.5	52.42	76.81
		22.65	57.18	98.52
		27.59	52.18	103.41
		28.87	50.55	84.83
		35.02	47.23	112.94
		32.25	64.68	84.68
		38.77	53	71.3
		31.58	76.93	107.72
		28.16	71.25	84.97
		36.55	68.14	88.36
		25.7	59.41	70.67
		41.1	79.82	79.19
		31.35	52.6	77.26
		21	113.54	78.91
		29.54	68.61	94.75
		19.8	48.62	82.13
		30.16	67.79	90.15
		31.09	50.5	85.17
		39.57	97.3	80.13
		28.94	45.68	94.62
		26.75	67.79	81.71
		32.37	74.82	79.34
		34.54	69.25	91.67
		31.62	51.81	102.79
		30.46	42.27	79.13
		20.22	84.24	134.18
		33.89	92.71	121.45
		36.75	91.77	152.56
		21.9	51.28	83.35
		43.7	47.33	116.5
		22.69	94.93	101.14
		21	60.2	75.92
		24.67	70.76	102.93
		43.02	62.37	89.06
		31.03	60.08	149.09
		27.95	93.12	86.94
		33.02	61.4	77.5
		22.29	110.03	87.3
		31.82	61.63	73.67
		22.93	52.6	144.79
		92.89	50.84	124.25
		76.86	48.32	79.28
		96.14	71.01	98.85
		75.6	45.04	79.07
		144.3	65.75	93.14
		81.22	56.08	90.69
		108.83	93.57	181.51
		97.41	55.69	98.95
		162.02	65.58	148.83
		108.71	66.23	96.41
		80.66	46	184.89
		139.34	59.9	120.62
		78.88	92.6	157.07
		110.28	53.06	121.93
		74.05	94.74	117.32
		131.02	80.3	103.45
		110.95	59.13	127.23
		70.12	48.24	161.32
		67.07	52.6	213.37
		117.56	52.03	119.63
		70.64	69.85	149.3
		162.94	73.16	105.53
		72.56	56.33	107.95
		72.34	54.78	131.89
		78.23	60	104.54
		139.59	91.28	112.08
		122.24	62.55	96
		135.69	62	123.89
		118.62	63.29	123.96
		128.04	109	182.51
		83.9	51.7	175.46
		122.93	81.5	156.59
		74.79	61.06	99.15
		93.62	82.45	135.18
		70.38	45.31	117
		188.94	88.47	146.52
		71.83	14.32	172.37
		86.18	26.64	191.74
		142.06	24.27	185.43
		152.7	15.52	189.04
		120.72	17.15	196.86
		92.5	12.65	91.69
		101.35	12.51	110.5
		109.28	21.38	202.02
		73.75	29.54	205.84
		71.85	19.88	210.66
		69.85	24.61	191
		71.91	16.46	206.06
		184.31	29.95	197.92
		96.11	13.93	131.61
		110.6	14.54	90.69
		106.73	15.16	210.45
		67.17	12.8	194.48
		80.06	20.79	210.33
		66.55	16.62	102.63
		70.16	13.05	201.44
		68.71	17.3	213.89
		65.67	13.41	118.73
		66.92	15.68	137.88
		65.46	10.8	206.75
		64.18	18.42	129.07
		64.29	10.67	136.33
		127.3	13.57	148.23
		70.44	15.44	180.75
		81.79	12.15	120.79
		114.75	12.13	196.23
		149.63	22.4	109.82
		73.57	28.76	90.18
		64.5	11.71	174.79
		65.69	12.61	126
		69.2	15	103.18
		150.1	17.65	126.67
		95.08	12.8	95.57
		67.32	22.29	109.28
		76.17	13.6	97.47
		106.03	14.46	120.16
		83.06	14.43	141.28
		64.17	12.85	131
		114.37	11.77	210.82
		94.08	13.96	143.68
		130.14	40.68	154.5
		106.22	12	181.61
		94.97	39.65	121.55
		122.64	21.96	131.17
		84.5	11.45	176.16
		116.35	15	174.98
		88.49	33.56	194.3
		67.92	11.09	200.44
		111.92	13.18	117.27
		68.71	14.08	207.12
		126.75	13.07	135.13
		151.01	17.79	131.63
		102.82	11.2	125.12
		82.57	11.55	122.1
		98.38	12.1	177.16
		107.25	14.08	160.15
		147.15	15.96	153.27
		93.21	13.04	128.53
		128.89	30.46	118.37
		135.23	18.48	110.56
		104.81	25.32	182.15
		94.14	15.31	124.39
		83.48	13.88	136.98
		141.42	29.01	110.6
		75.66	13.93	131.22
		67.72	13.27	139.36
		150.21	14.44	141.07
		92.26	12.55	114.52
		74.72	12.33	99.76
		67.81	12.7	135.75
		57.64	12.29	95.2
		61.47	17.23	127
		60.18	18.63	108.54
		87.22	21.53	106.23
		63.27	15.54	115.56
		66.29	13	129.42
		69.72	15	95.64
		97.88	19.75	110.55
		108.61	11.18	143.65
		78.72	12.83	112.42
		132.98	16.66	114.06
		125.05	12.79	190.37
		92.68	12	122.21
		95.4	19.94	131.94
		80.57	28.55	205.56
		67.63	13.57	108
		144.62	13.04	133.9
		80.16	22.03	100.78
		78.19	17.71	215.84
		108.54	29.36	198.1
		89.58	17.88	161.37
		127.59	26.48	200.07
		69.05	12.02	176.91
		97.63	29.05	193.69
		70.71	13.9	167.4
		86.52	12.62	128.36
		105.68	12.45	105.67
		92.48	16.75	192.94
		92.35	11.55	159.55
		101.88	18.24	204.46
		64.76	12.73	133.58
		151.98	14.21	208.88
		96.79	13.55	188.15
		84.63	14.91	167.4
		101.24	25.35	142.22
		70.46	16.74	183.8
		69.54	14	130.08
		72.21	17.29	145.11
		84.55	14.64	218.28
		80.12	21.63	197.18
		76.62	11.64	160.69
		63.36	17.31	156.72
		79.29	18.43	174.83
		72.18	17.38	194.97
		85.45	22.92	111.85
		67.54	18.13	122.28
		115.21	17.47	110.17
		95.2	23.31	168.9
		79.89	21	198.67
		71.29	20.66	131.75
		76.64	18.97	153.96
		63.71	20.51	156.05
		71.85	22.51	124.68
		116.43	17.68	111.25
		68.56	16.63	197.03
		61.14	18.77	165.2
		77.67	23.43	165.45
		94.95	23.44	132.04
		65.06	40.04	144.94
		93.65	38.66	177.12
		62.63	41.79	112.61
		82.34	25.62	149.17
		80.46	16.5	176.59
		108.59	22.67	187.68
		71.36	27.35	211.8
		96.16	22.2	194.14
		137.48	30.65	162.31
		72.11	20.5	156.52
		55.67	26.06	213.17
		60.27	30.19	167.11
		73.4	22.93	102.92
		146.52	32.61	106.23
		65	22.96	189.81
		100.92	45.58	143.42
		82.37	32.43	107.94
		68.2	19.79	187.32
		79.56	16.25	161.76
		65.18	15	111.25
		69.83	19.84	122.23
		69.72	35.05	177.84
		65.44	16.07	159.97
		63	20.33	103.91
		152.26	19.43	165.3
		98.08	15.78	139.75
		103.42	23.92	107.52
		85.68	22.26	135.97
		77.92	20.09	128.43
		58.08	17.74	137.12
		85.83	17.52	141.2
		144.73	24.66	225.12
		103.65	15.95	104.83
		101.67	24.67	101.73
		111.21	18.46	194.91
		108.07	28.42	198.72
		128.12	17.69	205.5
		125.89	16.58	211.57
		73.38	17.09	181.5
		66.66	28.15	196.66
		95.85	29.37	104.21
		66.4	30.63	200.78
		106.91	25	194.74
		112.71	29.52	156.5
		89.02	19.41	108.33
		58.21	16.68	122.57
		95.78	30.08	168.21
		85.81	24.21	132.38
		77.07	27.92	115.76
		111.76	22.01	126.47
		88.67	17.99	109
		102.41	18.67	106.72
		84.5	17.03	103.47
		61.83	23.03	166.79
		63.1	16.1	118.41
		94.92	15	115.52
		124.65	50.53	126.33
		63.38	21.28	101.8
		71.5	23.86	165.69
		96.58	16.14	153.14
		100.48	38.96	195.82
		96.4	36.51	143.08
		66.13	20.3	212.01
		81.77	18.87	200.33
		142.06	21.09	210.53
		71.17	25.33	225.55
		77.44	17.22	144.72
		170.35	24.36	196.38
		115.71	31.26	179.03
		172.63	27.4	186.13
		149.49	21.49	156.63
		79.56	26.09	163.9
		84.36	16	124.79
		150.53	16.64	114.7
		156.73	20.31	207.26
		161.33	16.82	119.56
		101.12	15	231.5
		92.8	17.48	191.22
		171.42	22.52	199.98
		116.41	37.07	226.96
		106.09	16.93	128.57
		118.04	18.54	221.76
		155.24	21.96	133.64
		108.65	15.44	116.21
		146.75	25.89	121.05
		141.17	20.47	171.15
		118.39	19.32	203.28
		95.65	22.29	225.67
		108	20.84	196.35
		114.13	20.44	119.43
		98.94	19.27	213.37
		149.57	19.85	197.27
		111.79	16.53	179.41
		84.1	17.87	172.69
		97.62	19.67	179.81
		50.94	17.09	128.14
		93.71	20.48	116.23
		52.78	15.67	112.89
		81.19	20.3	116.57
		53	25.69	132.47
		95.91	16.31	193.14
		95.2	18.01	191.21
		107.57	19.44	112.4
		46.96	17.3	175.96
		61.74	21.24	173.54
		138.64	19.63	92.15
		45.6	16.53	92.5
		49.37	37.52	136.73
		85.46	36.34	147.68
		74.4	57.66	202.22
		79	74.83	92
		55.45	34.87	149.46
		64.79	34.79	169.06
		90.54	34.07	147.83
		88.32	40.06	179.78
		90.41	66.35	140.52
		53.45	39.56	212.16
		99.85	34.67	141.32
		71.17	38.18	97.67
		73.49	37.19	105.02
		95.3	62.04	95.5
		65.34	32.17	180.29
		45.53	35.19	192.1
		81.34	33.69	153.78
		63.47	31.6	137.3
		74.12	34.41	204.45
		94.43	34.94	156.54
		100.41	34.82	91.92
		94.38	69.17	122.62
		55.74	48.8	208.6
		54.24	52.55	184.15
		73.57	61.68	167.54
		64.21	59.23	108.64
		61.2	46.43	206.09
		50.47	33.93	215.78
		79.34	37.32	172.13
		59.39	54.18	94
		58.9	50.39	140.97
		86.28	35.3	106.88
		70.68	35.33	172.34
		123.83	50.29	93.75
		126.48	67.78	106.91
		51.63	39.21	93.74
		66.77	42.85	124.22
		62.32	61.57	97.41
		63.7	37.93
		91.25	50.79
		67.5	62.04
		116.68	31.18
		117.43	34.83
		154.64	70.33
		182.84	40.99
		170.87	66.31
		176.03	32.18
		168.24	40.03
		114.07	34.1
		130.27	34.38
		107.67	68.42
		157.3	46.44
		197.46	40.6
		198.25	61.06
		175.95	36.38
		139.32	29.89
		100.39	38.14
		155.09	57.09
		110.62	33
		98.26	42.71
		130.39	45.63
		123.17	40.44
		137.59	32.44
		115.41	12.6
		93.9	12.41
		147.94	12.56
		112.37	24.01
		198.23	10.94
		173.88	8.4
		165.07	8.54
		105.82	10.64
		147.13	8
		96.91	17.04
		131.17	8.15
		188.66	20.66
		110.4	11.7
		193.47	9.08
		185.03	9.7
		147.44	8.23
		171.36	9
		194.93	8.65
		140.75	8.5
		151.62	8.81
		119.09	8.67
		111.8	14.45
		183.09	13.48
		138.91	29.72
		186.98	11.15
		134.94	7.78
		87.45	19.85
			11.4
			10.82
			9.23
			11.42
			8.7
			9.22
			8.64
			10.1
			8.36
			10.36
			16.2
			9.91
			8.83
			10.28
			8.96
			13.32
			11.47
			11.02
			9.55
			9.33
			9.35
			9.15
			11.6
			11.87
			9.5
			10.33
			10.15
			9.08
			19.21
			9.11
			11.13
			13.26
			9.89
			9.73
			13.01
			8.39
			8.83
			9.64
			10
			9.27
			9.22
			11.17
			14.14
			8.91
			10.6
			9
			8.67
			9.5
			9.9
			10.11
			9.8
			10.08
			10.15
			9.08
			12.19
			17.31
			9.81
			9.45
			8.63
			10.2
			24.12
			9.47
			9.1
			8.8
			8.11
			13.46
			9.4
			9.17
			9.63
			9.28
			10.4
			13.16
			8.52
			9.02
			10.43
			10.32
			9.48
			9.67
			9.21
			9.11
			8.57
			38.46
			9.64
			11.69
			10.34
			9.5
			9.71
			9.36
			9.36
			9.93
			8.7
			10.76
			8.25
			8.95
			8.81
			10.42
			8.25
			9
			10.2
			17.35
			10.01
			13.43
			10.54
			14.16
			9.55
			10.03
			8.95
			9.38
			8.65
			16.12
			10.86
			10.31
			20.09
			12.88
			12.54
			20.58
			8.52
			10.97
			8.76
			8.87
			9.1
			10.03
			9.08
			8.67
			8.88
			9.14
			10.49
			9.47
			8.7
			10.1
			9.65
			15.18
			8.9
			9
			8.44
			8.5
			10.59
			9.36
			21
			10.04
			9.32
			12.74
			10.75
			8.56
			16.49
			9
			8.14
			9.54
			8.91
			10.65
			8.33
			8.67
			7.75
			9.83
			7.83
			22.27
			14.45
			8.41
			11.41
			8.5
			8.29
			13.43
			9.07
			8.9
			18.78
			15.55
			10.64
			13.28
			12.24
			8.56
			9.35
			9.14
			9
			8.33
			11.75
			11.42
			9.23
			11.38
			12.26
			10.62
			10.71
			8.94
			10.9
		85.53	64.47
		174.27	49.62
		112.27	55.45
		189.48	127.99
		121.6	59.77
		105.52	86.05
		167.31	71.78
		111.93	109.25
		175.13	45.85
		141.89	62.49
		122.86	61.5
		184.39	59.84
		106.81	85.17
		112.47	60.03
		104.46	60.09
		99.63	56.58
		147.14	66.99
		131.65	87.84
		139.25	103.27
		106.12	67.94
		105.61	78.93
		114.29	109.37
		98	76.85
		167.64	55.29
		113.3	70.44
		176.65	83.69
		123.07	78
		181.94	79.1
		99.57	55.33
		187.46	99.15
		183	75.04
		79.04	68.43
		168.68	53.29
		150.08	53.73
		115.7	87.23
		188.98	115.47
		154.55	74.62
		179	47.23
		187.14	48.17
		180.86	46.48
		206.01	56.1
		148.1	53.25
		184.79	89.3
		114.52	69.98
		123.67	74.12
		107.35	67.13
		122	53.24
		90	41.65
		144.55	39.67
		158.98	59.09
		93	64.93
		99.16	79.69
		156.04	37.62
		139.45	79.61
		120.79	41.3
		92.44	57.53
		122.55	47.7
		85.75	38.8
		137.04	65.89
		99.08	48.16
		88.94	33.33
		88.4	42.55
		89.67	66.67
		116.44	49.25
		96.8	44.93
		92.05	43.67
		81.36	40.1
		93.85	48.65
		116.13	34.9
		86.7	43.65
		82.54	39.28
		156.05	60.2
		213.57	49.32
		173.45	53.6
		203.82	45.45
		162.44	37.2
		151.24	47.2
		125.13	39.91
		194.5	40.59
		142.75	36.36
		142.81	57.04
		195.21	82
		177.73	82.46
		182.04	81
		151	74.45
		158.3	76.88
		182.89	117.13
		180.66	117.14
		211.13	96.69
		204.48	104.7
		127.63	73.31
		154.11	152.79
		120.65	157.64
		181.31	175.09
		134.94	73.77
		167.13	81.17
		220.66	82.52
		184.35	75.94
		185.91	96.55
		187.16	94
		219.61	130.88
		188.07	87.11
		215.11	73.62
		208.35	130.98
		145.77	104.02
		225.69	130.45
		221.88	101.5
		200.25	73.08
		224.33	107.21
		167.05	119.75
		147.14	106.36
		139.43	97.06
		224.18	91.62
		201.05	115
		131.69	81.41
		188.45	159.31
		140.47	61.11
		178.44	111.4
		207.26	147.12
		211.76	74.34
		209.23	76.12
		137.55	99.82
		206.05	72
		138.14	71.13
		126.52	96.03
		102.82	88.74
		140.8	62.06
		174.68	55.2
		201.05	98.85
		142.5	66.47
		160.34	124.65
		188.48	121.72
		188.06	56.67
		166.76	114.71
		197.73	110.4
		138.88	136.61
		215.87	128.8
		181.08	170.91
		113.5	98.46
		203.69	98.21
		173.95	78.23
		202.49	113.55
		156.33	97.53
		165.79	152.52
		161.81	156.12
		170.15	150.07
		109.32	109.21
		186.07	128
		189.89	145.56
		157.94	88.31
		122.57	131.63
		123.9	121.53
		123.16	89.9
		170.4	103.04
		193.64	138.62
		132.05	93
		115.88	134.78
		195.11	93.33
		150.88	163.76
		170.81	110.07
		209.6	123.77
		189.44	103.16
		203.49	87.88
		197.06	187.09
		205.15	92.4
		219.96	204.69
		208.83	132.79
		201.42	106.14
		189.86	117.99
		142.35	88.11
		192.03	92.83
		231.78	85.67
		185.53	106.13
		172.3	108.45
		196.81	111.5
		130.63	54.59
		199.08	36.14
		132.2	36.91
		176.59	21.67
		188.21	26.38
		185.53	28.49
		213.96	26.16
		206.71	19.37
		177.49	41.47
		213.53	22.94
		214.41	32.58
		167.43	26.51
		131.24	23.38
		136.92	38.01
		164.35	28.25
		168.61	41.41
		178.03	20.59
		169.05	19.92
		188.18	21.47
		175.41	18.53
		209.42	39.75
		136	46.06
		190.15	25
		151.64	37.24
		227.31	24.09
		182.57	19.61
		167.76	19.67
		224.51	24.15
		151.95	21.44
		136.18	21
		175.41	32.1
		211.79	35.74
		191.04	25.46
		157.76	18.1
		185.11	20.45
		111.27	49.59
		161.36	38.08
		165.29	20.58
		144.88	67.87
		196.72	19.64
		204.21	19.61
		197.1	35.62
		193.72	20.53
		109.4	20.44
		105.54	29
		176.09	19.67
		216.29	23.56
		140.65	39.1
		199.16	45.77
		187.15	30.06
		121.08	39.64
		140	27.62
		128.2	20.75
		127.69	36.35
		157.47	48.56
		172.67	19.56
		112.87	21.72
		159.62	25.01
		176.88	28.44
		183	20.05
		168.93	21.88
		201.85	19.67
		162.24	22.24
		114.19	31.13
		165.15	23.19
		146.18	35.16
		132.35	32.29
		200.86	30.84
		187.47	21.2
		163.56	20.59
		120.9	35.55
		189.45	22.38
		183.55	38.69
		126.14	46.88
		174.59	30.45
		208.93	33.22
		202.47	35.29
		157.39	28.39
		152.29	20.44
		224.49	21.89
		147.26	43.25
		189.83	25.67
		220.43	33.54
		205.84	21
		224.46	38.8
		172.67	22.61
		195.05	22.07
		154.58	26.92
		205.13	20.07
		152.18	35.42
		230.9	30.23
		206.02	25.24
		120	20.3
		122.2	18.56
		143.41	20
		153.96	28.07
		132.92	34.57
		198.7	35.18
		180.33	34.54
		180.26	33.37
		172.7	27.66
		159.26	26.19
		173.88	24.2
		188.12	30.43
		120.42	20.08
		160.5	19.5
		175.19	22.59
		74.35	22.91
		66.89	19.68
		63.67	21.52
		58.14	25.1
		68.38	21.25
		64.1	22.16
		60.76	22.08
		76.93	24.28
		72.65	19.28
		76.91	20.57
		65	46.24
		76.16	20.88
		72.96	22.8
		57	27.87
		71.1	22.16
		94.74	19.05
		91.55	20.87
		72.83	20.71
		61.47	20.44
		86.34	22.31
		51.51	19.79
		85.19	21.56
		55.2	25.1
		136.74	21.32
		50.62	20.46
		70.72	20.92
		61.59	25.19
		78.38	25.93
		60.2	19.73
		74.13	22.82
		70.81	39.59
		86.46	20.08
		48.8	23.63
		64.24	31.93
		88.11	18.36
		115.97	24.98
		52.02	51.87
		63.67	19.22
		120.2	27.67
		135.13	21
		114.15	22.99
		64.86	31.22
		61	53.57
		67.74	28.93
		103.5	32.71
		93.92	41.46
		110.33	19.45
		100.96	33.18
		100.5	19.4
		84.19	18.94
		59.31	21
		72.18	28.06
		68.75	20.45
		72.43	19.55
		73.61	24.7
		56.55	23.18
		55.8	51.56
		109.89	32.43
		82.9	47.47
		110.84	43.44
		101.45	24.07
		107.56	29.51
		72.84	20.43
		73.49	21.23
		83.82	35.94
		72	23.08
		74.17	21.56
		102.23	20.89
		79.49	19.29
		100.87	18.76
		71.48	21
		72.3	39.97
		100.42	26.39
		65.3	18.71
		82.27
		117.89
		75.96
		61.73
		86.4
		102.04
		85.41
		86.02
		63
		93.79
		76.74
		79.32
		110.42
		62.14
		61.82
		169.37
		110.08
		113.5
		63.01
		104.4
		121.2
		118.7
		74.01
		96.06
		72.59
		71.43
		110
		59.33
		65.63
		53.92
		85.07
		62.42
		111.44
		120.52
		106.15
		116.49
		127.3
		138.06
		155.36
		153.19
		155.83
		185.35
		157.15
		98.95
		123.45
		96.67
		158.01
		89.08
		82.33
		123.67
		136.37
		138.8
		104.13
		98.55
		177.76
		147.38
		110.56
		86.69
		142.17
		88.86
		132.92
		93.81
		88.79
		109.45
		89
		92.52
		130.53
		128.8
		96
		98.17
		114.08
		98.21
		102.53
		92.4
		200.06
		154.92
		134.67
		151.96
		190.51
		159.1
		139.4
		168.05
		123.64
		159.07
		119.91
		130.63
		103.33

## Sheet: Figure 2O-mature CPL-1
		% of mature CPL-1
			WT				daf-2(e1370)
		Day 1	66.3483	62.9234	70.6759	75.278	85.2404	94.1694	87.3257	89.9486	0.91387
		Day 5	40.5744	59.1641	57.4956		75.777	71.0097	70.4492
		Day 9	30.6553	41.5849	41.8588	49.7304	62.7956	71.1628	77.1229	85.0311
			The numerical data are analyzed by GraphPad Prism 6 and represented as a bar graph in Figure 2O.
