# Supplementary material for: Lysosome activity is modulated by multiple longevity pathways and is important for lifespan extension in C. elegans
Source: eLife. 2020 Jun 2;9:e55745. doi: 10.7554/eLife.55745 (PMC7274789; doi:10.7554/eLife.55745)
Supplement: Figure 3—source data 1. [file elife-55745-fig3-data1.xlsx]

## Sheet: Figure 3K-Percentage in WT
				WT
				Day 1	Day 5
			Dense vesicle(%)	40	3.7037
			Dense tuble(%)	1.42857	0
			Dense-lucent vesicle(%)	25.7143	14.8148
			Dense vesicle-lucent tubule(%)	25.7143	0
			Lucent tuble(%)	7.14286	81.4815
			The numerical data are analyzed by GraphPad Prism 6 and represented as a bar graph in Figure 3K .

## Sheet: Figure 3L-Percentage in daf-2
											daf-2(e1370)
											Day 1	Day 5
										Dense vesicle(%)	70.8333	65.7895
										Dense tuble(%)	1.38889	17.1053
										Dense-lucent vesicle(%)	27.7778	17.1053
										Dense vesicle-lucent tubule(%)	0	0
										Lucent tuble(%)	0	0
									The numerical data are analyzed by GraphPad Prism 6 and represented as a bar graph in Figure 3L.

## Sheet: Figure 3M-Diameter
		Diameter of vesicular lysosome
		Day 1		Day 5
		WT	daf-2(e1370)	WT	daf-2(e1370)
		1.171	0.322	1.265	0.365
		0.868	0.272	0.764	0.501
		0.807	0.271	1.055	0.669
		0.624	0.321	0.635	0.382
		0.618	0.302	1.001	0.258
		0.46	0.364	0.92	0.289		The numerical data are analyzed by GraphPad Prism 6 and represented as a bar graph in Figure 3M .
		0.627	0.252	0.595	0.373
		1.452	0.338	0.952	0.365
		1.064	0.167	0.919	0.225
		1.002	0.278	1.043	0.357
		0.84	0.191	1.066	0.328
		0.647	0.192	1.282	0.22
		0.566	0.361	1.006	0.246
		0.716	0.261	1.148	0.204
		0.597	0.284	1.646	0.246
		0.672	0.366	1.922	0.462
		0.573	0.334	1.194	0.187
		0.527	0.437	1.342	0.243
		0.453	0.351	1.231	0.241
		0.527	0.277	1.93	0.144
		0.414	0.267	0.553	0.177
		0.689	0.355	1.198	0.167
		0.79	0.135	1.117	0.448
		0.471	0.149	0.935	0.251
		0.754	0.192	1.706	0.165
		1.158	0.223	1.398	0.428
		1.509	0.329	1.041	0.385
		0.566	0.243	1.056	0.276
		1.412	0.175	0.955	0.273
		1.46	0.14	1.106	0.233
		1.441	0.237	1.124	0.277
		0.674	0.791	1.651	0.39
		1.232	0.353	0.964	0.343
		0.663	0.352	0.696	0.418
		0.832	0.39	0.875	0.876
		0.582	0.299	1.218	0.602
		0.356	0.357	1.136	0.497
		0.489	0.525	1.283	0.562
		0.557	0.502	0.978	0.679
		1.015	0.31	1.684	0.307
		1.04	0.255	1.284	0.245
		0.647	0.478	0.881	0.49
		0.664	0.48	0.947	0.318
		0.542	0.446	1.566	0.451
		1.069	0.652	1.127	0.504
		1.61	0.5	1.8	0.328
		1.569	0.598	0.67	0.688
		0.983	0.538	0.838	0.724
		1.028	0.327	1.235	0.371
		0.632	0.423	1.398	1.018
		0.656	0.328	1.246	0.738
		1.058	0.29	1.06	0.372
		1.216	0.379		0.509
		0.691	0.302		0.28
		0.764	0.455
		0.858	0.275
		1.088	0.187
		0.408	0.514
		0.41	0.327
		0.385	0.299
		0.68	0.473
		0.472	0.257
		0.314	0.385
		0.608	0.298
		1.168
		1.535
		1.79
		0.798
		0.629
		0.783
