# Supplementary material for: Lysosome activity is modulated by multiple longevity pathways and is important for lifespan extension in C. elegans
Source: eLife. 2020 Jun 2;9:e55745. doi: 10.7554/eLife.55745 (PMC7274789; doi:10.7554/eLife.55745)
Supplement: Figure 4—figure supplement 1—source data 1. [file elife-55745-fig4-figsupp1-data1.xlsx]

## Sheet: Figure 4-S1A-Velocity
			Velocity of lysosome(um/s)
				WT										eat-2(ad1116)										isp-1(qm150)
			Day 1	0.0584	0.0456	0.0434	0.0634	0.0317	0.0526	0.0608	0.0187	0.0934	0.0879	0.106	0.09	0.132	0.205	0.18	0.0882	0.191	0.214	0.165	0.112	0.1386	0.104	0.07	0.1877	0.235	0.0948	0.0586	0.1464	0.048	0.072
			Day 3	0.0426	0.0232	0.039	0.044	0.0423	0.0135	0.0433	0.0331	0.0498	0.0444	0.114	0.216	0.0987	0.0881	0.2	0.131	0.15	0.153	0.147	0.101	0.0369	0.0363	0.04333	0.0473	0.0337	0.08	0.03	0.027	0.0581	0.0924
			Day 5	0.0417	0.019	0.02	0.039	0.012	0.0366	0.0285	0.0233	0.0376	0.0335	0.0722	0.112	0.0653	0.0528	0.123	0.127	0.08	0.102	0.0573	0.0393	0.0448	0.0387	0.0245	0.0547	0.0309	0.0816	0.0637	0.0804	0.0624	0.0393
			Day 9	0.0359	0.01663	0.0171	0.0111	0.01	0.0246	0.0139	0.027	0.0238	0.0275	0.297	0.168	0.0978	0.0876	0.0506	0.0562	0.0429	0.0596	0.0524	0.0852	0.06	0.0257	0.065	0.0237	0.0525	0.0544	0.0429	0.0839	0.0955	0.0984
				The numerical data are analyzed by GraphPad Prism 6 and represented as a bar graph in Figure 4-figure supplement 1A.

## Sheet: Figure 4-S1J-LSG-LTR
	Relative intensity of LSG/LTR in the intestine
	WT Day 1	eat-2 Day 1	isp-1 Day 1	WT Day 3	eat-2 Day 3	isp-1 Day 3	WT Day 5	eat-2 Day 5	isp-1 Day 5	WT Day 9	eat-2 Day 9	isp-1 Day 9
	0.989346	1.55139	3.19968	0.901181	0.826071	0.596079	0.489488	2.42331	0.998559	0.437677	2.85397	0.997265
	1.27862	1.6154	3.01392	2.00889	0.985915	0.956214	0.603187	3.13903	1.06258	0.596708	2.61435	0.968235
	1.46208	1.46017	2.37285	1.8165	0.465691	0.443115	0.585533	4.38571	1.08127	0.447877	3.25111	0.973635
	1.54251	1.35821	1.95629	1.18799	0.558722	3	0.64121	3.2811	1.28994	0.500634	3.4722	1.01408
	1.12203	1.311	2.93745	1.27421	0.555012	0.845206	0.701848	2.45618	0.997267	0.657378	3.34343	1.00168	The numerical data are analyzed by GraphPad Prism 6 and represented as a bar graph in Figure 4-figure supplement 1J.
	1.19156	1.1563	2.87234	2.48681	0.644902	3.77406	0.580037	2.85238	1.22699	0.639918	4.19886	1.01788
	1.02955	1.26494	2.72689	0.87029	0.585777	0.826271	0.617237	1.96852	1.36049	0.768987	3.3624	1.03813
	1.13156	0.873757	2.7054	0.93909	0.896298	1.18376	0.73653	3.21415	1.71567	0.698645	2.99257	1.0298
	0.966922	1.44808	2.30881	1.86337	1.12288	1.18047	0.725179	2.67492	1.24282	0.561697	2.99969	1.0719
	1.2402	1.11116	3.40659	1.12467	0.92638	1.0397	0.684942	3.60875	1.37001	0.688385	3.10919	1.02933
	1.31385	1.90394	2.29892	1.25672	0.569422	4.41192	0.675831	2.1463	1.13319	0.70275	3.01045	1.01133
	2.27947	1.96678	1.35987	1.18185	0.561854	1.96781	0.603154	1.75958	1.07535	0.471181	3.04746	0.951098
	2.65258	1.55441	1.64418	0.970974	0.758167	2.94559	0.759123	1.51275	1.42961	0.458346	3.20932	0.894513
	2.47785	1.65773	1.58934	1.14757	0.644684	0.585875	0.51591	1.88414	1.38872	0.578652	2.9746	0.799903
	1.63014	0.898638	5.20755	1.75739	0.81573	1.78431	0.694833	1.90222	1.22434	0.660421	3.58108	1.10759
	2.33323	1.16256	4.67395	1.64071	0.612172	0.762253	0.501255	2.20629	1.24398	0.521796	4.04677	0.956982
	1.33661	1.43913	4.48963	1.62115	0.683014	1.07465	0.493336	1.39416	2.46368	0.495412	3.48738	0.872055
	1.90866	1.82369	3.35775	1.68766	0.527692	1.32222	0.541118	2.31923	1.12254	0.615962	3.82702	0.82126
	1.52178	0.928955	4.24537	1.3483	0.689558	1.08156	0.548431	1.71212	1.8987	0.523321	2.95811	0.709168
	2.76041	1.15841	1.21328	1.14857	1.26345	0.64218	0.625554	2.22858	3.5097	0.531838	2.7867	1.16634
	2.15854	1.12381	1.25754	2.0789	0.884404	1.04413	0.620199	1.94839	2.10485	1.0206	2.93078	0.672261
	2.08729	1.03017	1.13522	1.44433	0.549709	0.443772	0.628909	1.44308	1.98087	1.02425	2.83673	0.844804
	2.33248	0.947407	1.0969	1.37682	0.879339	0.412124	0.877172	2.09645	1.14285	1.31881	2.94587	0.742164
	3.29136	1.99716	2.33641	1.50622	0.694467	0.518246	1.48902	1.7587	2.81456	1.05767	2.9995	1.05567
	2.41789	1.06671	3.66943	1.05763	0.609598	1.24289	1.98463	1.70346	1.25527	1.11915	3.48796	0.961724
	3.12098	1.12301	1.92011	1.73313	0.702684	1.47393	1.89959	2.64451	1.29864	0.999806	2.66841	0.976692
	2.79386	1.2684	1.81451	1.0499	0.719532	1.71572	1.89166	1.42502	0.936677	1.02457	3.35226	0.793091
	2.82918	1.34616	0.756092	1.23743	0.527418	2.17886	1.42922	1.79122	0.826076	0.917355	3.00334	0.96732
	2.45915	0.851973	1.36427	1.47653	0.942556	2.05364	2.65572	1.72303	1.8615	0.808177	2.39494	0.905287
	3.21856	2.54311	1.64701	1.11015	0.589367	1.16829	1.64597	1.58327	1.43414	1.03225	1.0402	0.953594
	3.39731	2.39622	1.60205	1.28905	0.551892	2.67119	1.8131	1.58308	0.84157	1.0501	1.17219	0.795796
	3.36443	1.842	1.06593	1.21235	0.535069	1.5958	1.26445	1.75208	1.42865	1.06124	1.09091	0.85352
	2.6228	2.34766	1.09626	1.17318	0.651374	1.04263	1.45145	1.38474	1.83687	1.08123	1.0625	1.05343
	2.08748	2.61914	1.04386	1.68152	0.508825	1.79308	2.00994	1.73594	0.95812	1.05757	1.08397	0.906873
	2.70311	2.45693	1.08718	1.022	0.496012	1.65308	1.57114	1.81641	1.425	0.84648	1.128	0.882572
	2.32262	3.07387	1.16754	1.18188	0.472063	1.03749	1.87252	2.74869	0.846555	1.01769	0.987654	1.03634
	3.71847	2.61485	1.36735	1.06035	0.628024	0.958963	1.87721	1.50908	0.907827	0.828952	1.26027	0.87651
	2.35919	2.50701	1.90196	1.49308	0.553774	1.3849	1.17326	1.98231	2.74739	0.842116	1.14213	0.846885
	2.51024	2.86895	1.83178	1.10771	0.536431	1.21762	1.24644	2.28287	1.82911	0.913962	1.11556	1.08015
	4.15087	2.60909	0.943128	1.96178	0.623768	1.28182	2.37374	1.42048	0.94836	0.999594	1.31579	0.842163
	2.93955	2.91985	0.92	1.54532	0.646564	1.03755	2.03938	2.46234	2.31269	0.915987	1.23418	0.781984
	2.21074	2.31612	1.07368	1.62295	0.764396	1.09885	2.14696	2.04138	0.906882	1.04286	1.13281	0.778218
	2.53604	2.73419	1.03419	1.50678	0.505701	0.942368	1.05367	1.97029	3.13469	1.07903	1.36559	0.771483
	2.09818	2.48462	1.31638	1.31799	0.520823	1.88768	1.92374	1.24939	2.83787	0.765714	1.20388	0.829327
	2.55005	2.60331	1.29518	1.36952	0.614879	1.05342	1.80516	2.15379	1.79418	0.952751	0.9	0.903497
	2.10231	2.49245	1.30216	1.29375	0.585535	1.01584	1.56803	1.07189	1.03265	0.785787	2.11	0.755906
	1.69167	2.78115	1.61364	1.02483	0.586491	1.0864	1.71125	1.75397	0.890274	0.989169	1.89	0.45082
	4.44231	2.2374	2.34	0.935886	0.583673	1.19304	1.17267	1.96375	0.847643	1.18375	1.5	0.44898
	2.00266	2.41755	1.56	1.48967	0.647203	2.08803	1.35261	1.58828	0.733029	0.827998	0.79	0.390558
	2.6507	2.72674	1.9	1.7513	0.843556	1.2959	1.08779	1.39556	0.798916	0.87173	2.25	0.80315
	2.37348	2.0445	2.54	0.971266	0.542406	1.1727	1.64444	1.43803	0.922915	1.22351	1.82	0.67
	2.21266	2.13306	1.69	1.45469	0.664526	1.5305	1.47822	1.59811	1.52449	1.43121	1.9	0.85
	3.15271	1.72599	1.32	1.52869	2.76123	1.56467	1.10233	1.28236	1.90654	0.918771	1.53989	1.21476
	2.51699	3.14914	0.99	1.22558	2.49321	1.64231	0.714572	1.74164	1.3851	0.795196	2.45436	1.23634
	2.24375	1.85976	2.06564	1.5036	2.39247	2.13599	0.607572	1.08297	1.68515	0.989274	2.1173	1.01405
	1.2366	2.76375	2.2069	0.955098	2.23609	1.94098	0.675882	2.07514	1.0991	0.8324	2.01648	0.906575
	1.7133	2.13898	1.33333	1.01223	3.56832	2.18475	0.72192	1.72596	0.900701	0.855488	2.08893	1.41205
	1.54531	3.38874	1.36486	0.949473	3.10373	1.88241	1.13938	1.91518	1.10265	1.1639	1.86935	1.01542
	1.46643	2.11448	1.08054	1.77582	2.3202	1.34421	0.785548	1.93134	1.00865	0.826928	1.9718	1.11547
	1.49853	1.01687	1.53247	0.974934	2.47385	1.38989	0.744457	1.90934	1.00745	0.811098	2.35468	1.73801
	1.62843	2.50751	1.2963	0.954346	2.29733	1.37261	0.782333	2.2748	0.902851	1.03027	2.51042	1.09123
	1.23712	3.14675	1.1954	0.976476	2.58214	1.65875	0.702439	1.98225	0.937742	0.834658	1.26744	0.823519
	4.84931	2.52211	1.2807	1.58975	3.54591	1.6194	1.693	1.72227	1.17438	0.882283	1.33478	0.791304
	1.58503	3.04434	1.32653	1.527	2.5119	1.37787	0.680921	1.69103	0.961658	0.897109	1.46512	0.930438
	3.61845	2.92995	1	1.42465	3.09553	1.42419	0.789045	2.16033	1.33355	0.858082	1.44896	0.502736
	1.48856	3.79587	1.14925	1.31212	2.44109	1.5789	0.71826	2.45619	1.23903	1.0265	1.28442	0.56174
	2.33323	2.9234	1.8718	2.01966	2.40485	1.41611	0.678187	2.15858	0.962117	1.0214	1.52466	0.87208
	2.77858	3.03256	1.85075	1.53049	2.2838	1.56169	0.776892	2.19229	0.85347	0.900809	1.60208	0.658024
	1.78138	3.06079	2.61017	1.81752	3.8492	1.803	0.717905	2.22111	1.11643	1.34164	1.65385	0.687516
	2.17381	2.44075	1.12791	1.82102	2.97076	1.66231	0.721429	2.31515	0.9658	0.995312	2.0678	0.712457
	3.1296	4.01342	1.09474	1.70985	3.03037	2.54319	1.16708	3.21224	1.1451	0.961071	2.07407	0.970387
	2.55617	2.95716	1.39423	1.56721	3.051	1.87909	1.03525	2.35207	1.15655	1.09397	1.92929	0.82821
	2.38562	2.67891	1.49398	1.36641	2.63454	1.75836	0.619163	2.01286	1.27521	0.885052	2.68254	0.83897
	1.85694	2.91324	1.87013	2.15909	2.19147	1.85103	1.312	2.54303	0.974698	0.852749	2.40196	0.860708
	1.79802	2.5156	2.23636	2.5062	2.56072	2.0914	1.39359	2.97546	1.20343	0.858065	1.84328	0.813687
	1.90347	3.53266	2	1.50716	1.89708	1.7962	0.803935	2.4839	1.37421	1.37997	1.392	0.751581
	3.28729	2.55902	1.54305	1.79771	2.00131	1.82075	0.818125	2.36986	1.31146	0.968407	1.62143	0.91431
	3.58578	3.21442	1.29082	1.582	2.30526	1.93416	1.18851	3.10848	1.11772	1.32587	1.96094	0.761517
	3.18098	2.90918		1.7417	2.36005	2.27436	0.66991	2.25648	0.792953	1.1045	2.25	0.840986
	2.89428	3.41185		1.36544	2.8	1.95849	0.863094	2.68657	0.80198	0.97325	0.984	0.574228
	2.276	2.8954		1.58905	2.81588	1.93075	0.844619	2.80358	0.923497	1.01599	2.21739	0.62321
	1.60693	5.42756		1.70403	2.65066	1.90653	0.773046	2.55	0.860143	1.06991	1.22222	0.715101
	2.99974	2.71917		1.62545	2.57944	2.08693	0.791471	2.71173	0.918924	0.979291	2.2963	0.696877
	2.12157	3.06325		1.3729	2.64322	1.93629	0.785351	2.28154	0.736197	1.02962	1.2517	0.500303
	2.99302	4.82513		1.561	2.48797	1.59162	0.879062	2.78571	0.809022	1.16914	1.1203	0.722021
	1.59137	4.35511		1.74839	3.16565	1.73267	1.14164	2.60865	1.24845	0.938063	1.14932	0.336486
	1.65773	5.24556		1.58298	2.38581	1.72041	0.607077	1.14483	1.15729	1.40174	0.996063	0.616027
	1.38496	2.42715		2.21007	3.46795	1.56009	0.875121	1.24242	0.823061	1.34293	1.15982	0.62333
	1.5844	3.4087		0.941277	2.74773	2.1352	1.32531	1.24476	1.36057	1.13773		0.471612
	3.26316	2.97551		1.58877	2.29637	1.79057	0.730448	1.09091	0.842251	1.41367		0.617887
	2.24003	4.72146		1.4503	2.26968	2.46019	0.790728	1.17033	0.567539	1.51202		0.420857
	2.24991	3.8667		1.01349	3.25523	3.47853	0.914265	1.0679	0.727107	1.17769		0.88759
	2.45252	4.45679		1.137	3.29471	3.80006	1.05901	1.09132	0.805763	1.708		0.749399
	1.34189	3.44956		1.72427	1.79732	3.71456	0.910903	1.24873	0.839817	1.28588		0.778838
	1.65579	3.84488		1.30928	1.33022	3.53371	1.10909	2.23404	1.03074	1.27167		0.614775
	1.65847	3.02561		0.980435	1.53011	3.83794	0.875966	1.1573	1.02238	1.49985		1.00716
	2.88795	2.63473		1.91755	1.37989	2.43309	0.807269	1.20874	1.02855	1.49517		0.45377
	1.44262	2.87038		0.918991	1.33928	2.93644	1.25356	1.44512	1.88309	1.3498		0.523135
	1.45359	2.42536		0.871199	1.2563	2.64142	0.793545	1.35976	1.67	1.9629		0.385362
	2.30073	2.72024		1.06935	1.303	2.77339	0.928278	1.20833	1.26404	2.09347		0.806176
	3.48571	3.69771		1.25071	1.34725	2.39459	0.749699	1.44512	1.17548	1.56927		0.584813
	2.05872	3.05644		1.24402	1.31126	2.69023	0.906856	1.35976	1.20017	1.49132		0.679727
	1.90909	3.47919		1.97924	1.61937	3.33698	0.870462	1.20833	2.10834	1.18393		0.106461
	1.77125	2.71728		1.42706	1.17001	3.65907	0.791604	1.73016	1.1598	1.34977		0.626339
	2.11218	2.13761		1.39674	1.34543	5.22477	0.875201	1.57317	0.965444	1.83857		0.385823
	1.46435	2.37148		1.2302	1.30644	2.3601	0.771192	1.17734	1.09506	1.4899		0.821297
	1.50697	2.39071		0.948731	1.53969	2.87066	0.756264		1.28174	1.72579		0.691901
	1.20838	3.26419		0.872453	1.14646	3.13797	0.47307		3.50124	1.16404		0.824561
	2.416	2.71308		3.69298	1.13142	3.3102	0.649121		1.49324	1.62271		0.725289
	1.29461	4.88268		0.90469	1.23167	2.63694	0.643408		1.77985	1.36723		0.77175
	1.29998	3.75091		1.09083	1.15707	2.6147	0.664962		1.10631	1.71631		0.616702
	1.17889	3.07518		0.912336	1.38406	3.30232	0.278143		2.41842	1.43185		0.687425
	1.23526	1.54959		0.947607	1.11929	2.38239	0.266521		1.0268	1.72528		0.479384
	1.34628	1.86026		1.00456	1.19113	3.1978	0.19387		1.02568	1.20536		0.512821
	0.632915	2.5162		1.39073	1.16058	2.08073	0.277014		1.20306	1.26868		0.428136
	0.78499	3.04317		1.46694	1.3678	3.3264	0.389947		1.24998	1.84625		0.625984
	0.610616	3.96744		1.26226	1.09199	2.24824	0.260182		1.20016	1.36546		0.570142
	0.976218	2.7399		1.36595	1.32037	2.52149	0.191988		1.12731	1.91294		0.490758
	0.825052	1.74019		1.74519	1.2222	2.21035	0.419411		1.15854	1.30171		0.988166
	1.09913	2.30532		1.68358	1.37284	2.15062	0.365886		1.20736	1.40638		0.950673
	1.03894	1.94959		1.35634	1.5207	2.81613	0.503198		2.10861	0.661111		0.924901
	1.00571	1.71366		1.51636	1.25936	3.0613	0.454269		0.942022	1.25358		0.996078
	1.03707	3.15672		1.80491	1.20653	2.01008	0.456248		1.24794	0.880673
	1.22089	1.85847		1.39247	1.35015	3.46878	0.346364		1.50861	0.776273
	0.713306	2.06421		1.40468	1.38619	3.12487	0.380468		0.97825	0.936694
	0.971809	2.27363		1.38077	1.04997	3.39079	0.648374		1.52412	0.694532
	1.33182	2.39375		1.25826	1.21285	1.65237	0.680099		1.08014	0.665009
	1.11794	2.42113		1.54685	1.5343	2.40722	0.828589		2.0081	0.97997
	1.3669	0.96236		1.445	1.16299	1.11031	0.812799		1.99742	0.779647
	0.705153	3.23495		1.37292	1.19404	1.50422	0.435731		1.12782	1.15571
	0.632683	2.00966		1.50651	1.20151	1.35465	0.662351		0.807152	0.841354
	0.718855	1.47096		1.73406	1.77793	1.5634	0.758889		2.43111	0.929131
	0.651331	1.85129		1.66804	1.60569	1.44638	0.348941		1.14264	1.41159
	1.20075	2.04509		2.08758	1.18578	1.68136	0.424557		0.838139	1.18374
	1.14834	2.12848		2.33878	1.30657	1.44758	0.377366		1.09738	0.890809
	0.904274	1.98846		1.99481	1.24563	3.618	0.523733		0.847576	1.10801
	0.94269	4.06554		0.529076	1.15409	3.3339	0.369037		1.73661	1.00152
	0.938691	2.08367		0.626078	1.25331	3.6792	0.295801		1.78702	1.38461
	0.879675	2.56981		0.625097	1.62734	4.1933	0.229542		1.64656	1.18384
	0.890158	2.02146		0.548255	1.28676	3.3098	0.570831		0.912988	1.02299
	0.637112	1.46872		0.595204	1.5511	3.50962	0.454604		0.905584	1.58807
	0.62586	1.7872		1.0185	1.25971	3.7508			0.987309	1.41961
	0.85604	1.72989		0.562293	1.18443	3.61917			0.962725	0.843965
	0.885478	2.44525		0.653536	1.43784	3.96018			1.01487	0.846271
	0.874793	1.73157		0.928549	1.2548	3.27948			1.04753	0.953755
	0.785984	3.0627		0.656614	1.44964	3.36598			0.945006	0.535372
	0.904274	3.76369		0.608868	1.33162	2.06723			1.16445	0.482743
	0.94269	2.00548		0.666518	1.34043	1.67771			0.858618	0.910137
	0.938691	1.2913		0.722314	1.03587	1.61914			1.20992	0.271396
	0.592453	1.45528		0.746522	1.77564	1.86608			0.964159	0.330274
	0.879675	1.17143		0.515965	1.33121	2.40412			1.34375	0.523066
	0.890158	1.7169		0.85577	1.08726	2.07244			1.14517	0.247863
	0.603176	1.4566		1.17809	1.11285	1.89191			0.942739	0.266137
	0.637112			0.80678	1.23186	2.04929			0.911465	0.343733
	0.62586			1.00465	1.08033	2.2154			1.01243	0.35068
				0.647013	1.27567	1.99636			0.972894	0.23291
				0.646911	1.32308	2.69821			1.04989	0.298441
				0.681209	1.0821	2.71754			0.895629	0.939224
				0.748926	2.06235	2.13207			1.03661	0.471539
				0.748654	2.48135	2.33897			0.889516	0.626563
				0.954387	1.71447	2.06597			0.838623	0.72462
				1.32886	2.07248	2.46714			0.972451	0.744478
				0.965629	1.86168	2.46476			0.959388	0.530127
				0.83091	1.68152	2.19926			0.929489	0.467456
				0.867515	1.77696	1.51837			0.868416	0.454915
				0.849231	1.68499	1.84838			0.880194	0.57201
				0.811127	1.63193	1.82233			1.21888	0.658921
				0.526066	1.88351	1.66699			0.938883	0.839051
				1.53143	1.80389	2.14778			1.1866	0.371077
				0.652145	1.70852	2.22674			0.964844	0.460438
				0.752286	1.86627	2.36157			0.907012	0.343036
				0.834653	1.60601	1			0.829774	0.545412
				1.04918	0.934011	0.954545			0.909442	0.531646
				0.730881	0.861219	0.923567			0.971947	0.240151
				0.75472	0.954131	0.669528			1.10185	0.467213
				0.624717	1.05093	0.706186			1.11846	0.366967
				1.03911	0.901628	1.29457			0.95083	0.615087
				0.971182	0.919516	1.52308			0.852338	0.483639
				0.799208	0.975304	0.850932			0.884536	0.434589
				0.707099	1.17124	0.805195			0.880835	0.413655
				1.13641	1.14454	0.693548			0.928194	0.528362
				0.680239	1.67801	1.55357			1.14328	0.537445
				1.16283	1.53187	1.56311			0.870054	0.47641
				1.09434	1.05215	1.54622			0.858674	0.472868
				0.762501	1.0602	0.740296			0.974535	0.594488
				1.18996	1.18499	0.581673			1.05778
				0.957986	1.05523	0.666667			0.823858
				1.39087	1.29746	0.671498			1.03659
				0.937686	1.13166	0.488987			1.48674
				0.913859	1.06924	0.590551			1.21221
				0.646551	0.87654				1.47766
				0.768495	0.929872				2.29043
				0.933555	0.961754				2.22638
				0.940506	0.966929				2.04471
				0.6888	0.875847				1.9983
				0.858883	1.06966				1.74219
				0.981973	1.28918				1.29243
				1.01036	1.05166				2.16899
				0.818133	1.10055				1.47644
				1.15405	1.19061				1.57413
				1.19782	1.00977				1.83951
				1.30853	1.01559				1.71611
				1.28328	1.0048				1.81144
				1.40534	1.09851				2.13815
				1.46139	1.18082				1.53433
				1.10156	1.17656				1.87737
				1.59272	0.937037				1.32872
				1.53127	1.05187				1.59993
				1.41163	0.94531				1.26511
				1.64908	0.895176				1.37339
				1.64736	1.37621				1.85169
				1.25167	1.01516				2.00048
				1.49303	1.0537				1.46418
				1.13167	1.03304				1.28441
				1.15957	1.05154				1.17784
				1.67331	1.40668				1.46029
				1.51258	0.966814				1.20511
				1.46114	0.943776				1.23878
				1.4985	1.27584				1.41729
				1.41023	1.00898				0.912469
				1.01808	1.15802				1.01617
				1.94803	1.06185				0.970251
				1.34274	1.02454				2.25999
				2.07721	1.1463				3.2182
				0.838764	0.92175				2.30523
				3.69082	0.960707				2.49099
				1.99659	1.20111				1.25102
				1.36496	1.05999				3.29641
				1.32326	1.16268				1.80661
				1.03802	1.04859				3.17306
				1.83524	0.980285				1.8691
				0.977514	1.10399				2.33106
				1.33435	0.990935				1.69502
				1.38859	1.94479				4.01068
				1.04366	1.3706				2.80445
				2.21297	2.07541				3.31494
				1.19042	2.04625				2.16501
				1.17196	1.93236				1.88076
				2.12936	1.78199				4.0828
				1.12378	1.84703				1.05025
				1.84735	1.89057				0.764103
				1.48538	2.03254				0.886792
				0.917649	2.50592				1.11
				1.18386	1.81218				1.10407
				0.87954	1.94988				1.07042
				1.07741	2.1411				1.86408
				0.842727					2.06897
				1.40678					0.685039
				1.27173					0.700787
				1.36851					0.519231
				1.14354					0.689189
				1.10793					0.456897
				1.46014					0.677419
				1.41518					0.803922
				1.68413					0.521951
				2.02792					0.436735
				1.02242					1.04865
				0.969658					0.771144
				1.16934					0.812155
				0.827669					0.836207
				1.28943					0.918367
				1.84474					0.96087
				1.29282					0.938053
				0.932611					0.905405
				1.23622					0.724719
									0.956044
									0.94898
									0.874419
									0.745455
									0.806283
									0.550201
									0.647059
									0.971074
									0.69697
									0.774775
