# Supplementary material for: Lysosome activity is modulated by multiple longevity pathways and is important for lifespan extension in C. elegans
Source: eLife. 2020 Jun 2;9:e55745. doi: 10.7554/eLife.55745 (PMC7274789; doi:10.7554/eLife.55745)
Supplement: Figure 4—source data 1. [file elife-55745-fig4-data1.xlsx]

## Sheet: Figure 4M-Length of lysosome
		Length of tubular lysosomes(um)
		WT Day 1	eat-2 Day 1	isp-1 Day 1	WT Day 3	eat-2 Day 3	isp-1 Day 3	WT Day 5	eat-2 Day 5	isp-1 Day 5	WT Day 9	eat-2 Day 9	isp-1 Day 9
		0	3.6056	2.5554	3.182	3.9925	2.91205	12.9402	4.2485	2.6926	9.3814	4.7434	2.30215
		1.326	6.2097	1.4866	1.409	1.9235	1.4765	5.36	6.71865	2.1024	8.0362	9.2472	2.05185
		0	7.0937	2.2136	2.2	2.2804	2.506	5.1039	3.0414	2.28475	5.1088	3.1623	2.5298
		0	4.5343	1.34535	1.808	5.0961	1.89735	4.7802	2.6926	2.45965	8.2735	6.5788	2.7074
		0	4.8374	2	1.726	4.0719	2.7803	4.1437	6.7117	2.06155	6.5947	4.7707	2.2136
		0.1	5.5227	2.84605	2.89	4.6174	3.5735	5.7306	3.3121	1.94165	8.2377	3.2894	3.22025
		0.1	2.7166	4.16775	2.5	1.9647	1.36015	5.5444	3.3287	1.42125	7.642	5.1971	2.40415
		0.9	2.3087	2.28475	2.169	3.6359	1.9313	7.7466	5.05185	3.25575	7.5472	5.3345	2.06155
		0	4.653	2.99665	3.499	2.5554	1.56205	6.1774	3.5	2.2472	6.4815	8.9849	1.9313
		0	2.6907	2.0396	3.002	3.3601	2.8	5.5317	5.9849	2.51795	6.4008	3.8419	1.4866	The numerical data are analyzed by GraphPad Prism 6 and represented as a bar graph in Figure 4M.
		0	2.6627	2.6926	2.164	2.5495	2.508	8.132	3.3838	2.5807	8.4528	4.9518	2.1401
		0	2.6401	1.98495	2.5	4.8662	2.15405	5.7723	6.7803	2.76585	5.608	3.0067	2.7857
		0	4	2.5456	2.633	3.8013	2.7857	4.3324	4.6401	2.7166	7.1028	7.6217	2.06155
		0	0.8602	1.78885	2.5	2.6	3.6674	9.5005	4.126	2.9155	6.6708	5.7245	3.34215
		0	2.3195	2.5318	1.425	2.9732	1.58115	6.3008	3.7202	2.70185	5.3759	3.3971	3.42055
		1.417	2.9614	3.6715	2.209	5.9304	2.9614	7.9831	5.3854	0.8602	6.7978	5.009	1.3
		0	3.245	3.49285	2.04	6.2	1.7	5.1894	4.1785	2.4739	4.9406	3.9217	2.3707
		0	2.4515	3.4785	1.517	5.6613	1.61245	5.5471	3.2016	1.8385	9.5383	4.6098	1.7205
		0	2.0396	3.00165	2.731	4.8662	1.4866	6.261	9.9026	1.2	6.3569	3.0594	3.3541
		0	2.0809	2.7586	2.647	3.4655	2.508	8.0399	3.6014	2.6476	11.8106	4.0224	1.7205
		2	2.4413	3.37345	2.1932	5.4406	1.02955	4.9193	6.0415	2.3022	4.1725	4.1785	2.0248
		0	4.8104	1.6763	2.4207	4.11095	2.43515	6.2032	5.97745	1.7493	4.6043	5.3935	3.015
		0	4.2202	2.3537	1.9799	3.467	1.7	5.1478	5.92285	3.015	4.4721	3.85875	3.7
		0	3.88975	1.92355	2.642	4.7927	1.8601	5.6859	5.46445	2.1	3.2802	5.63205	2.8443
		0	4.7854	2.06155	3.1575	5.5227	2.1024	5.2555	5.23925	1.9209	4.5277	3.53555	1.3689
		0.1	3.9623	2.51795	3.0017	3.3838	2.61725	8.9677	3.2573	2.2847	5.9682	5.6886	2.4339
		0.1	4.04475	2.02485	1.2728	3.36005	1.7493	7	7.6942	2.5962	5.001	5.2953	0.2887
		0	6.3906	1.78045	0.922	4.5607	2.2136	8.4	3.2249	4.6174	4.7854	2.86355	3.1381
		0	4.4045	2.76585	1.9723	5.1614	1.9105	6.5146	6.0033	3	4.4822	3.99625	2.6564
		0	5.5172	2.65705	1.4765	8.1492	1.58115	4.7074	8.8	4.3863	2.642	7.86815	6.0483
		0	7.2498	2.4166	1.8028	3.7121	2.2	6.6008	7.1386	3.6	4.826	8.1241	2.6489
		3	5.8439	2.8018	2.0881	3.1145	1.61555	6.9814	4.5607	3.1623	3.8013	4.4166	0.4106
		0	4.6174	1.72045	1.2207	4.1183	2.23605	5.8078	2.4413	6.6483	8.406	6.10985	5.649
		0	4.7413	2.05915	2.2472	4.02	5.4626	5.2953	4.1037	6.9857	5.3	5.36005	2.0177
		0	2.8636	1.58115	0.3606	3.1623	2	4.9204	5.5785	3.6715	6.2	7.3539	1.3162
		0	4	4.60975	2.5298	3.7216	3.4059	3.4409	2.912	3.4059	4.3566	5.8	1.612
		0	5.9666	3.5	1.3454	2.6173	3.3287	5.7315	3.8833	4.6174	5.4009	3.5777	2.5745
		0	2.6077	3.49285	1.3	4.1231	2.4083	7.6059	4.1231	3.4059	5.3254	4.5122	3.9458
		0	5.099	2.8653	1.253	2.9967	4.5695	4.4777	4.7707	2.4166	8.3487	4.0249	3.9446
		0	3.3941	1.4765	1.9925	3.4713	4.3174	6.3812	4.8166	2.8	6.14	3.8471	3.7736
		0	3.4928	2.08085	1.3454	3.9446	5	6.7231	6.2	2.126	6.9893	4.8166	3.8471
		0	3	2.6306	1.5264	3.8484	5.2802	4.776	3.6878	2.4352	7.2367	3.7947	6.2129
		0	4.4721	3.4176	1.6125	4.2048	3.5384	7.1176	3.5609	3.3015	5.8258	6.6483	3.2558
		0	4.2942	2.15405	1.3153	1.8358	3.4	8.3024	5.8	1.7804	5.5082	4.2521	4.9396
		0	5.4037	2.6401	1.2207	1.7117	4.6	5.608	8.6093	4.1617	4.7265	6.8411	4.2755
		0.1	4.6	2.20225	1.6401	5.5859	5.4	4.14	7.225	2.4739	5.0912	6.7676	3.9294
		0.1	3.3106	2.6926	1.3153	9.6167	4	4.9254	7.6105	3.8471	7.2498	4.9396	3.5609
		0	4.9518	1.772	1.1402	5.3141	3.8833	4.9244	4.9679	3.8	4.134	6.4498	3.8471
		0	6.3561	2.05185	1.3416	5.3254	4.2426	4.998	5.4406	2.3409	4.8166	4.7413	3.8833
		0	6.6483	2.72945	1.5556	11.3172	4.3081	7.64	5.5317	3.6878	5.5227	5.8241	4.8826
		0	4.4	2.47385	1.6553	6.0531	2.506	6.6008	6.6483	4.1761	5.2839	5.0478	5.3367
		0	4.6819	3.40145	0.9487	6.1351	3.2802	3.5609	6.3246	3.8833	5.2393	4.8166	3.7577
		0	2.7785	3.25575	1.3038	7.1218	2.8844	6.3781	6.2097	3.6497	4.9729	4.3081	8.7864
		0	3.3287	2.02485	1.7029	5.6462	4	3.8833	9.7591	3.9598	4.3139	7.3539	6.6
		0	2.2023	2.02485	2.3022	8.6163	3.6	4.1976	5.6356	4.0792	5.0329	7.2277	4.3267
		0	2.3854	2.86005	1.9647	6.5299	4.6174	4.5011	4.9518	2.6907	4.3829	5.012	7.9246
		0	2.1401	1.72045	0.8602	9.2087	2.4739	5.5082	5.2498	4.0447	9.2849	3.8471	4.219
		0	2.6077	6.2642	0.9487	9.7201	4.3081	4.2202	3.6222	3.6715	6.6242	6.5513	6.3246
		0	2.2	1.9799	1.5297	6	3.7736	4.684	4.669	3.0529	8.4646	7.823	3.4234
		0	1.1705	3.3526	1.3454	8.2219	4.4407	5.5	3.821	5.4626	4.9396	4.0447	2.7203
		0	2.2023	2.4166	2.7074	4.3681	5.9666	5.3075	4.3081	2.6	11.8929	4.3681	7.6236
		0	1.6155	5.4406	1.6643	3.2	5.004	5.6586	5.4406	3.8419	6.6483	4.9193	7.2471
		0	1.5133	4.4181	2.6926	7.9925	3.1113	4.8549	4.669	4.219	11.2161	5.8241	4.669
		0	4.4721	1.7205	1.3601	6.8352	3.9446	4.0706	4.9518	3.3526	11.9633	4	5.8034
		0	5.016	2.126	1.7	3.8833	3	2.9069	4.8826	1.9698	12.3369	3.6056	4.8415
		0.1	5.4332	2.9732	1.4142	6	4.8	5.4342	5.5317	1.3038	9.986	3.7363	7.2801
		0.1	5.1264	2.0881	1.6492	3.1016	3.3941	3.0887	5.4918	1.1705	15.3375	4.0792	5.4589
		0	2.912	3.3526	2.0248	3.7108	3	5.6294	5.6921	1.4422	8.2219	4.9477	4.0497
		0	5.016	4.8826	1.3601	3.8053	4.6	4.2942	6.0729	1.7088	9.4021	4.5607	3.0463
		0	5.6036	2	2.0248	4.0311	5.142	3.5609	9.0089	1.6279	9.683	4.4045	5.2612
		0	4.2426	2.6833	1.4422	2.6571	4.7539	3.9661	10.3576	1.5811	15.8493	4.3267	4.3681
		0	2.8284	3.0463	1.4142	4.6615	4.4	3.5777	7.8435	1.5264	4.3909	6.7676	5.374
		0	3.2558	4.3681	1.8	2.9	4.4045	3.3615	5.6639	1.3	5.8181	9.8793	5.9059
		0	3.2	4.8332	1.3454	3.4928	3.8471	5.5317	6.7941	2.1095	3.8288	3.4234	3.4
		0	3.7736	3.8833	2.0518	3.891	2.953	5.7974	8.6023	1.8439	6.5299	5.4406	3.7736
		0	3.1623	3.6056	2.0248	2.2361	4.0497	4.6872	4.9679	2.0396	6.8184	6.4622	4.9477
		0	2.8	3.4176	2.1024	3.015	3.1113	4.1761	6.0033	1.7	5.4489	5.3254	3.0463
		0	3.5511	3.0594	2.2361	2.6	2.1633	3.4928	10.2	1.8682	5.8052	6.5146	3.4
		0	1.8248	3.7577	1.4866	2.0518	3	3.3106	4.9518	2.5318	3.454	4.3174	3.1241
		0	2.6019	2.953	2.5554	2.4759	3.6056	3.4059	5.4406	1.9416	3.5014	4.3863	4.7074
		0	1.8439	3.2558	1.0817	3.1623	2.6306	5.2612	3.9395	2.1	9.2574	3.4928	4.2
		0	2.3601	4.2802	2.377	2.3345	3.8833	5.1039	4.5122	2.1633	4.8021	5.1923	4.4944
		0	1.7692	2.8284	2.502	3.6056	4.3863	3.2016	6.4777	1	7.1113	4.1183	4.4272
		0	1.7464	4.005	1.3416	3.8328	3.2249	5.2202	2.4207	4.3681	5.1196	7.0682	3.9395
		0	1.8028	3.9699	1.8868	3.8275	4.0497	5.4009	2.5	4.4045	4.827	4.669	4.6043
		0.1	2.2	3.6056	2.1633	4.3463	3.0067	6.9116	2.3022	4	7.5802	6.9857	3
		0.1	1.5	3.5777	2.0616	5.8034	4.6174	6.5765	2.642	6.0828	6.2201	5.3852	5.4148
		0	2.0296	1.4422	1.7493	3.759	4.4181	7.1701	1.9416	7.6655	5.5902	5.5317	1.9698
		0	1.2806	3.1048	2.1587	2.7295	2.6077	5.2469	2.1954	4.219	6.0374	3.5384	3.2802
		0	4.7	2.6907	2.7295	2.8231	2.7203	5.9034	2	3.1241	5.5227	5.1108	4.0249
		0	1.9026	2.2091	1.4422	6.691	2.7785	6.2008	8.5859	2.8636	3.891	7.088	4.1761
		0	3.8868	2.2361	1.8601	3.8079	2.8284	6.7602	2.2361	3.4176	4.9679	5.3852	4.219
		0	2.4	4.5607	1.772	6.2817	3.7947	4.3186	2.7785	2.9732	5.4452	5.8241	6.2032
		0	1.3601	4.0447	1.5652	3.5341	3.4	6.1911	2.8792	3.5777	8.2765	4.005	4.4
		0	1.3038	5.8138	2.2361	3.9	3.7947	6.1911	5.3009	4.4	5.0478	5.3141	2.8844
		0	1.8385	3.9395	1.5297	5.954	3	4.6174	2.8601	2.8844	6.5307	6.7052	4.0792
		0	2.5495	4.1231	2.126	3.265	2.953	3.761	3.5468	3.9294	8.7092	6.0166	3.5384
		0	2.1932	3.2985	1.6401	4.5607	3.9446	4.6868	1.9416	2.5612	6.1741	7.147	4.8703
		0	2.4698	2.8	1.4318	3.4525	4.1761	4.5074	2.8284	5.0636	8.5884	3.4176	4.2379
		0	2.3087	2.7857	1.562	3.8471	3.2249	3.4819	5.2	4.5122	6.5276	4.3909	4.3863
		0	2.3537	2.8071	2.7299	3.1765	3.3526	5.1904	2.7313	2.8844	7.766	7.2277	3.4059
		3	2.2472	4.5122	1.1045	3.8471	3.3106	6.6024	2.6401	3	6.5105	4.8415	3.8471
		0	1.5297	3.7947	0.5308	4.4721	2.8636	3.5617	2.6926	1.8	6.8332	3.2802	3.9395
		0	1.6401	6.0828	0.4541	3.4366	3.677	2.9404	2.4698	1.6031	7.5763	4.6648	4.5695
		0	1.9026	2.9732	1.0019	3.4234	2.8284	3.0808	2.6627	1.3892	7.5452	2.3707	3.1623
		0	2.2023	3.4928	0.826	3.6235	3.821	3.083	2.4352	1.9	6.1733	2.9155	3.8053
		0	3.4176	4.1231	0.4928	3.1016	2.126	7.1415	3.1355	1.3038	6.8569	1.7464	3.7363
		0	5.9946	2.6907	0.9447	3.3526	4.2379	3.4008	3.0254	3.1401	6.5844	3.1064	4.9679
		0	3.9946	7.0342	0.8325	3.0067	2.4083	3.124	2.2552	2.5179	5.3786	2.7731	2.912
		0	4.7646	5	0.5948	2.465	2.8071	8.2503	0.3768	1.9925	8.3709	2.2023	6.5299
		0	5.3421	3	3.2398	3.5586	3.2062	2.304	1.0363	1.7692	8.3148	3.1	2.4739
		0	6.0926	5.7585	0.8476	2.1226	2.9732	2.1812	2.426	2.4187	7.0586	2.9206	2.8284
		0	6.5604	5.0478	1.1867	4.5229	3.1241	5.3286	4.9802	1.253	6.4622	3.0067	3.4
		0	4.3627	3	0.2168	4.2137	3.3532	6.1352	1.3744	1.4036	6.6173	2.4187	4
		0	4.5896	4.2048	3.8867	3.1916	5.1063	9.24357	0.4993	1.3038	6.7201	5.7333	3.5384
		0.1	4.2809	4.4407	0.1813	3.4071	6.7584	2.5202	3.0892	2.3195	6.3342	4.9333	4.4721
		0.1	4.8676	4.7539	2.3847	2.4096	2.3446	6.6989	0.4476	1.4866	6.8223	5.0115	4.4272
		0	3.5538	3	2.0886	1.7393	1.6337	6.9231	3.165	1.7088	7.6037	4.7496	2.6683
		0	4.9064	4.9193	3.1009	2.934	2.54	2.4272	3.9275	2.6077	6.7331	4.25	4.3735
		0	4.3661	5.2154	3.6838	3.9027	2.902	5.1229	5.6129	2.0881	6.8408	4.1499	0.9765
		0	3.9746	4.3863	1.5785	0.6142	2.3359	8.6719	1.228	2.3345	6.4329	4.8583	7.0559
		2.447	6.1332	3.6056	1.2546	0.6711	1.1675	5.3648	3.1443	2.4	5.7497	4.8667	4.7153
		0	5.3462	4.2	5.2719	2.7984	5.3723	2.4531	1.3514	1.7889	7.334	4.6598	2.2899
		0	4.7549	4.0497	2.0771	4.65	4.0878	3.41	1.9655	1.4765	7.2908	4.0214	5.1666
		0	5.3503	2.2	2.3938	3.1014	4.6319	4.0934	0.84	2.6689	7.5384	4.0083	5.8124
		0	3.9354	2.506	1.7083	1.3165	0.7442	1.9178	0.7343	0.7001	6.9321	4.4098	6.5816
		0	4.3411	2.8844	2.8042	1.474	6.9374	1.8251	0.8154	1.6744	7.6697	5.6515	3.4528
		0	6.9912	4.2802	0.6634	2.3081	3.6723	2.2882	4.5301	2.7761	6.1999	4.1833	0.8543
		0	6.2298	6.0033	3.6969	4.932	1.7184	3.5294	2.4509	2.539	7.17	6.4991	1.3356
		0	5.1862	3.7363	1.0384	1.4361	0.6273	1.2011	4.4189	3.1474	6.4552	4.1794	2.6815
		0	6.7283	2.6077	2.2799	3.0492	4.6037	3.3147	1.331	0.8349	6.5865	5.7333	2.0714
		0	7.6807	5.0636	5.2389	3.2356	4.5749	4.3671	1.6853	2.4977	5.9864	4.5278	2.9867
		0	7.6826	2.3324	1.3899	3.0421	1.1609	3.1684	2.5764	0.6423	7.5894	6.7333	2.2251
		0	8.3179	5.5027	2.5837	0.8241	4.6268	3.0088	2.0861	0.3356	6.2205	4.3322	1.906
		0	3.9302	5.6462	1.7024	5.4555	3.1568	1.8609	3.5283	2.7648	6.969	5.4667	0.3222
		0.1	3.9653	3.821	1.3955	3.3286	1.9716	3.9917	5.5948	1.2768	6.8084	4.1039	1.2724
		0.1	6.5087	2.8284	1.3529	4.529	0.431	6.0972	2.4142	1.9019	7.2067	4.0333	4.1417
		0	5.5123	1.25	1.0833	3.3638	0.6496	4.9034	3.9738	3.5897	6.5765	4.0129	1.1952
		0	4.0737	2.4674	7.0996	4.8934	1.816	3.5919	1.706	0.4792	7.5631	6.2179	3.7308
		0	4.7855	2.2029	3.9098	2.3808	0.4991	1.0346	5.5271	4.5401	7.7675	4.5333	3.1933
		0	7.036	2.6694	0.7961	3.4492	2.5921	2.8271	0.8734	6.7704	6.6287	4.8667	2.3718
		0	5.0682	0.9502	3.551	1.9869	3.6582	3.1176	1.9565	3.7727	8.0127	4.3619	0.4062
		0	5.1053	1.4672	1.539	3.6559	2.959	3.5653	2.803	2.5808	6.3298	4.5667	1.4107
		0	6.6094	6.9601	1.2244	3.0797	0.8695	2.2828	2.352	7.8807	6.2858	5.4333	5.0419
		0	7.8077	1.1356	4.187	3.081	3.9305	2.6378	4.1296	1.2937	6.232	4.2043	4.1297
		0	7.4879	3.6814	0.3505	3.2508	2.7823	1.0876	0.9687	1.9694	7.5148	4.8	2.587
		0	6.5671	4.3429	3.6132	4.8382	5.1708	3.0197	3.0535	4.9266	6.4608	4.1223	2.1216
		0	5.5125	5.513	2.8875	2.6008	7.3677	4.2954	1.8905	2.5668	5.8254	4.3952	2.1025
		0	4.5436	3.4316	3.8361	1.765	2.9284	4.366	2.38	2.7347	8.2051	4	1.7242
		0	8.2337	6.4101	1.8783	2.1563	2.7366	5.4251	0.701	4.7556	8.167	6.7072	1.3736
		0	6.1492	5.144	3.6075	6.3571	1.6368	2.8048	2.9271	3.0171	7.5589	4.1654	0.7921
		0	7.0729	2.6611	4.9508	1.6769	1.243	2.5232	2.5788	5.1537	8.3623	4.1667	3.0883
		0	4.7007	3.0649	2.8544	5.6847	5.2921	5.1473	1.9205	3.2482	6.6873	4	3.3159
		0	7.4094	6.2426	2.9573	2.6833	2.3465	3.9865	4.4732	2.9211	5.5208	4.4	1.8024
		0	4.9202	0.8849	2.0381	1.401	2.1898	1.8324	2.9471	0.8506	8.2455	4.1989	3.8498
		0	5.8309	4.9876	1.3672	5.0693	1.8081	3.5777	3.1129	2.8457	6.6112	6.1221	2.8076
		0	3.3387	1.4098	3.7716	4.4052	5.1995	4.9548	5.0797	3.6397	5.7785	4.5333	3.3208
		0	5.2529	3.6219	4.4012	1.416	3.7265	4.2816	3.7386	1.3176	6.7228	5.1333	2.219
		0	4.251	3.9021	2.393	3.861	1.7796	4.2658	0.8975	0.6742	7.093	9.1557	0.1921
		0	6.6944	2.8529	1.1937	3.3329	0.3957	7.2201	5.6657	1.059	8.4408	4.1667	3.7678
		0	5.5521	3.643	1.1302	0.4074	3.7671	2.4073	3.5683	2.4364	6.908	4.9891	1.962
		0	5.2077	1.3566	1.8337	3.1358	0.7022	1.7696	3.4637	1.4869	6.2581	4.0398	3.6541
		0	4.2424	1.7139	2.6867	2.3769	1.7837	0.6595	3.5819	2.6742	6.6633	4.2667	1.8213
		0	5.0628	1.4509	4.5864	3.3299	1.7347	1.2695	2.6068	6.4829	7.7708	4.3	2.0257
		0	8.7197	3.925	1.3182	1.3353	2.5072	5.9169	1.5384	4.8829	8.2112	4.9981	3.8901
		0	5.1588	6.4245	1.1244	0.9234	4.8979	1.575	3.1871	7.6276	6.8804	4.0667	1.6433
		0	4.1217	2.022	1.358	1.8195	0.7555	4.2754	2.3584	3.544	6.9674	4.1407	2.1121
		0	3.9182	4.4249	5.4509	2.9431	2.0578	2.5348	1.1906	1.0698	6.7843	5.2629	2.8472
		0	9.0808	5.7717	1.9578	0.8886	2.5713	5.3836	3.4535	4.8378	8.0243	4.5742	1.2491
		0	5.0216	7.522	1.885	2.7456	0.6884	2.6768	2.0264	2.2356	8.0035	5.4333	2.4972
		0	3.1819	2.8552	5.212	0.9231	3.388	2.2112	3.2288	1.4091	5.6498	6.9	3.242
		0	5.5811	6.4358	1.8868	1.4433	0.2905	5.4636	11.944	2.9005	6.56	6.5667	0.7709
		0	5.701	3.3205	1.3387	1.149	1.46	2.3994	2.5774	3.6636	7.0602	5.0233	3.6194
		0	7.0093	2.3554	0.9227	1.9963	4.4095	4.8634	2.66	2.3504	5.5938	4.3	0.7622
		0	8.2917	3.3081	1.7549	1.67	1.1862	3	2.9416	4.1474	6.9551	4.1979	2.1729
		0	7.7751	2.9465	2.9779	1.6215	1.236	4.3136	4.0423	2.3794	5.8546	5.7105	0.8064
		0	7.6763	3.185	2.6908	0.8845	2.1569	8.6928	3.5314	1.353	6.5147	5.6055	4.4439
		0	7.8288	5.1991	2.6087	3.4496	1.9345	4.3732	3.4162	1.3526	6.0948	5.2403	1.998
		0	5.199	4.6379	2.5524	3.1307	3.1228	3.0869	4.924	3.9096	5.674	5.4619	0.4444
		0	4.479	5.8113	2.1574	4.3899	2.8674	5.282	2.0855	1.3775	5.6599	4.4667	4.8622
		0	4.2106	4.9269	0.3774	3.8109	1.3649	4.82	0.3421	5.2204	4.734	4.0565	4.4268
		0	4.8166	1.0052	0.4674	2.7027	0.3207	5.6422	5.1168	1.8277	3.6739	4.1333	6.2413
		0	8.0392	4.2333	0.7333	1.9948	2.9313	5.8486	4.9043	0.6825	4.5667	4.1293	5.2904
		0	5.095	3.2006	0.8545	5.4503	4.7092	4.7308	2.2	2.7214	4.3667	6.024	4.7436
		0	4.9762	4.5854	1.0488	2.3585	0.3637	4.3702	4.3529	3.6833	5.0636	5.4417	3.1611
		0	5.36	2.5747	1.0533	2.2922	3.5254	8.5053	1.8239	1.4133	5.9664	4.0805	2.6318
		0	4.8618	1.1946	1.2346	3.938	1.4452	1.8397	2.667	1.3961	3.9333	4.1333	3.3931
		0	6.7585	1.1145	1.39	1.4159	1.4062	4.5245	8.965	1.474	5.1921	4.04	2.8286
		0	3.667	2.457	1.5299	5.333	3.8559	4.4278	8.843	1.5392	1.7179	4	5.9434
		0	4.12	3.7708	1.5333	0.503	1.8833	4.3691	2.333	1.0125	5.4974	5.827	1.5995
		0	6.129	1.0043	1.5611	4.842	3.6068	4.3732	1.386	3.3435	7.4333	4	5.5805
		0	5.146	1.6625	1.5667	6.333	1.0225	3.0869	7.805	1.5581	5.0333	6.6892	2.6949
		0	5.333	0.8344	1.5667	3.49	1.8102	5.282	0.964	2.3021	5.6768	4.0333	5.7831
		0	4.267	2.3258	1.7602	1.998	0.7782	4.82	8.809	2.6286	4.2154	4.05	2.5879
		0	6.333	1.1758	1.8333	2.667	1.4519	4.0333	0.244	4.2403	6.2	0.805	2.6744
		0	4.542	3.129	2.0088	1.93	1.3155	3.7028	2.381	2.2436	6.4333	1.333	1.3416
		0	3.667	1.8273	2.1667	3.821	1.9676	5.437	1.61	4.4698	4.3481	0.667	1.389
		0	2.579	2.0243	2.1762	0.333	1.6696	2.8667	6.298	2.7639	5.4944	1.407	3.6381
		0	6.566	2.3735	2.3833	4.667	6.5836	1.7417	5.244	1.6874	8.1948	2.667	2.68753
		0	5.949	0.1173	2.4123	3.441	1.4865	3.2323	2.256	1.6764	7.3184	3.12358	1.667

## Sheet: Figure 4N-Lysosomal number
	Number of vesicular lysosome
		WT										eat-2(ad1116)										isp-1(qm150)
	Day 1	36	30	40	32	43	36	40	31	37	40	68	71	60	53	68	59	73	61	65	55	88	80	93	65	61	84	80	90	72	68
	Day 3	26	20	33	29	25	30	31	22	28	25	35	45	40	28	35	42	33	45	50	38	83	55	84	56	97	65	64	52	75	54
	Day 5	13	18	17	20	25	15	13	18	22	26	30	40	38	31	29	25	18	20	11	13	52	96	50	46	56	72	50	40	59	63
	Day 9	8	10	6	5	11	9	5	10	13	5	23	30	33	25	24	28	30	15	12	10	63	69	70	87	86	43	55	63	69	50
	The numerical data are analyzed by GraphPad Prism 6 and represented as a bar graph in Figure 4N.

## Sheet: Figure 4O-Average volume
	Average volume of vesicular lysosome(um3)
		WT										eat-2(ad1116)										isp-1(qm150)
	Day 1	4.55	2.48	2.66	3.2	1.36	2.63	2.46	2.28	2.22	2.54	0.719	1.28	1.01	0.899	1.66	1.08	0.943	0.85	1.02	1.18	1.25	1.66	0.838	1.17	0.949	0.893	1.23	0.908	1.21	0.981
	Day 3	1.82	2.44	2.27	1.79	1.4	2.13	2.64	2.15	1.99	2.44	1.04	0.834	1.29	1.61	1.23	1.97	2.23	1.53	1.33	1.45	0.814	1.33	0.756	1.09	0.708	0.83	0.714	1.1	0.79	1.25
	Day 5	3.45891	3.91	7.52	4.19	4.21	3.89	2.22	2.74	2.55	3.9	0.725	1.34	0.843	0.874	0.659	1.28	1.2	1.11	1.22	1.18	1.1	1.26	0.848	1.09	1.05	0.907	1.03	1.25	0.85	0.61
	Day 9	3.42	2.52	3.63	4.64	7.02	5.33	2.3	3.39	2.67	3.95	1.1	1.16	1.02	1.14	1.35	1.71	0.887	0.717	1.25	1.21	0.548	0.978	0.569	0.854	1.1	0.965	0.58	1.3	1.11	1.205
		The numerical data are analyzed by GraphPad Prism 6 and represented as a bar graph in Figure 4O.

## Sheet: Figure 4S-pHtomato
	Average intensity of pHtomato
	WT	eat-2	isp-1
	38.22	15.39	35.17
	54.41	16.22	69.1
	34.45	15	37.64
	37.75	12.77	53.47
	47.62	14.44	63.45	The numerical data are analyzed by GraphPad Prism 6 and represented as a bar graph in Figure 4S.
	42.21	15.66	32.97
	45.01	17.71	45.03
	33.83	22.01	43.64
	35.4	19.63	63.59
	71.74	14	58.51
	36.76	14.47	50.11
	35.83	24.18	55.19
	47.32	13.94	32.84
	39	16.15	76.44
	36.42	22.94	55.63
	42.54	25.23	42.12
	40.93	15.97	32.97
	34.29	13	39.71
	37.87	15.94	52.05
	55.78	14.75	30.5
	42.26	14.23	39.57
	68.14	16.63	49.41
	73.52	31.98	43
	87.17	12.4	62.52
	53.3	14.33	57.28
	85.56	14.48	35.55
	36.56	17.47	59.3
	34.92	25.08	45.78
	42.42	14	46.88
	51.08	16.46	64.61
	39.46	13.5	40.78
	90.62	14.25	64.69
	49.18	16.91	63.26
	35.93	16.07	43.65
	38.85	22.05	54.5
	39.84	13.1	29.86
	39.01	26.72	32.2
	41.98	17.16	58.03
	42.42	16.11	38.42
	55.61	14.97	43.23
	38.48	31.57	46.77
	40.39	15.27	43.6
	41.82	20.34	57.52
	49.41	17.9	67.84
	37.73	16.02	65.23
	33.7	17.54	32.24
	57.66	13.56	38.25
	34.46	15.67	33.83
	43.33	17.91	42.08
	45.19	14.51	42.67
	37.24	14.59	32.59
	56.76	23.17	40.38
	34.09	18.46	34
	34.44	16.34	41.38
	37.79	19.86	34.31
	40.71	14.92	33.51
	93.83	18.23	60.24
	79.74	17.2	52.41
	95.49	13.33	37.09
	66.18	13.42	37.49
	62.14	27.34	43.74
	81.44	17.31	35.79
	100.7	22.6	40.6
	77.48	13.95	54.31
	68.71	17.1	38.79
	83.43	17.6	56.74
	60.83	13.89	36.71
	58.46	29.03	62.06
	61.67	18.35	32.82
	74.23	16.33	56.73
	64.1	18.71	49.12
	63.91	17.01	47.73
	69.18	21.11	28.67
	100.97	14.93	40.59
	74.28	16.6	48.55
	58.31	16.49	29.56
	63.57	22.57	54.05
	76.2	15.76	76.25
	57.46	15.63	72.22
	63.69	15.73	67.09
	65.73	12.8	70.5
	62.18	26.83	57.89
	61	22.32	55.09
	84.74	21.72	59.63
	76.21	16.03	74.15
	62.38	20.55	50.02
	73.87	14	38.52
	117.62	54.46	60.64
	70.66	17	42.65
	105.89	16.33	38.36
	151.89	24.66	38.73
	63.09	34.84	35.58
	78.47	17.75	38.14
	56.92	28.84	69.19
	69.96	14.5	42.3
	129.7	23.05	36.33
	60.15	31.2	34.7
	100.82	25.44	44.68
	70.24	34.67	32.8
	111.9	27.7	38.3
	123.85	24.43	41.8
	151.62	52.01	37.33
	66.2	51.22	33.77
	91.05	34.02	38.53
	97.56	35.05	40.52
	58.82	42.04	53.23
	75.54	27.76	45.46
	71.04	41.56	38.77
	102.32	28.58	37.71
	63.79	26.76	44.73
	61.89	37.84	58.99
	67.89	49.73	45.87
	80.65	24.7	42.14
	63.28	53.34	43.02
	64.91	40.21	32.5
	143.7	33.97	79.17
	73.79	39.1	93.78
	66.95	59.96	122.7
	83.85	29.64	134.88
	74.39	29.33	129.47
	71.76	53.63	76
	27.23	38.29	65.47
	24.43	34	88.47
	25.52	41.51	111.1
	39.04	53.82	153.42
	20.94	21.28	82.39
	41.7	17.7	74.48
	21.55	17.43	144.39
	34.4	18.73	123.57
	21.2	23.1	135.53
	30.38	25.09	99.08
	24.8	30.82	98.71
	23.13	19.02	79.78
	24.86	43.77	132.17
	75.61	23.43	134.3
	24.5	33.18	116.25
	22.65	29.6	141.11
	27.59	22.74	131.91
	28.87	24.09	74.28
	35.02	17.55	57.94
	32.25	22.12	103.5
	38.77	20.69	60.86
	31.58	23.12	66.55
	28.16	18.89	80.13
	36.55	47.38	89.59
	25.7	33.14	85.97
	41.1	23.48	85
	31.35	24.92	93.83
	21	21.08	110.76
	29.54	22.41	91.38
	19.8	18.44	98.54
	30.16	23.91	72.09
	31.09	17.27	62.18
	39.57	18.44	130.26
	28.94	18.38	126.4
	26.75	38.94	103.58
	32.37	24.48	89.38
	34.54	20.44	63.73
	31.62	18.86	75.04
	30.46	27.21	59.52
	20.22	25.72	118.13
	33.89	30.51	77.52
	36.75	25.14	94.74
	21.9	26.5	82.35
	43.7	33.02	66.36
	22.69	28.07	60.91
	21	26	115.28
	24.67	23.13	46.42
	43.02	25.1	71.74
	31.03	19.5	52.62
	27.95	27.44	50.92
	33.02	28.05	72.07
	22.29	23.16	99.71
	31.82	28.39	92.08
	22.93	28.43	48.4
	92.89	33.08	52.12
	76.86	33.85	57.8
	96.14	29.59	65.21
	75.6	26.29	64.14
	144.3	24.11	49.33
	81.22	54.41	73.35
	108.83	19.71	58.77
	97.41	27.41	121.64
	162.02	25.04	56.42
	108.71	28.77	67.62
	80.66	32.73	58.93
	139.34	35.05	49.4
	78.88	26.47	86.8
	110.28	23.06	112.97
	74.05	41.94	70.77
	131.02	19	102.91
	110.95	18.62	72.4
	70.12	30.23	76.97
	67.07	27	107.53
	117.56	37.15	63.39
	70.64	35.8	60.05
	162.94	28.55	67.15
	72.56	43.73	81.51
	72.34	50.95	52.14
	78.23	74.19	64
	139.59	47.81	51.94
	122.24	31.68	93.53
	135.69	39.65	45.9
	118.62	52.77	59.9
	128.04	39.02	60.33
	83.9	31.27	111.53
	122.93	55.56	56.88
	74.79	40.73	53.56
	93.62	43.26	72.76
	70.38	33.62	53.09
	188.94	30.34	49.61
	71.83	30.21	61.92
	86.18	29.11	54.5
	142.06	30.31	58.21
	152.7	32.83	56.6
	120.72	33.95	57.15
	92.5	47.75	69.67
	101.35	29.75	53.91
	109.28	28.32	85.79
	73.75	28.3	62.77
	71.85	30.43	81.81
	69.85	36.93	100.43
	71.91	31.94	90.94
	184.31	67.89	53.42
	96.11	39.43	71.94
	110.6	49.11	82.52
	106.73	56.51	56.75
	67.17	29.56	51.23
	80.06	29	51.3
	66.55	33.6	53.27
	70.16	29.75	47.54
	68.71	30.27	38.27
	65.67	31.4	44.61
	66.92	29.9	39.33
	65.46	39.45	36.73
	64.18	30.35	33.67
	64.29	36.21	38.19
	127.3	42.12	40.9
	70.44	30.8	39.06
	81.79	31.5	39.56
	114.75	30.55	41.25
	149.63	21.65	32.55
	73.57	17.55	52.45
	64.5	29.46	37.63
	65.69	18.23	48.34
	69.2	32.72	47.75
	150.1	29.91	39.3
	95.08	18.3	64.94
	67.32	27.22	36.31
	76.17	24.77	58.77
	106.03	30.64	56.27
	83.06	27.27	67.48
	64.17	28.7	45.68
	114.37	20.8	36.25
	94.08	25.35	53.36
	130.14	20.2	76.34
	106.22	31.49	30.53
	94.97	34.82	58.47
	122.64	17.91	39.2
	84.5	39.22	37.4
	116.35	17.67	52.38
	88.49	32.56	44.03
	67.92	51.78	30.76
	111.92	30.5	54.64
	68.71	22.9	42.18
	126.75	26.29	61.32
	151.01	30.06	63.7
	102.82	55.25	37.5
	82.57	51.7	37.17
	98.38	62.7	51.24
	107.25	65.46	74.03
	147.15	55.1	40.4
	93.21	55.91	56.66
	128.89	69.89	59.18
	135.23	83.05	37.82
	104.81	63.88	41.62
	94.14	61.26	53.17
	83.48	106.43	56.55
	141.42	44.07	35.28
	75.66	66.94	47.14
	67.72	56.59	47.96
	150.21	48.88	66
	92.26	111.54	37.4
	74.72	58.95	52.43
	67.81	53.09	64.19
	57.64	74.14	41.69
	61.47	52.33	29.5
	60.18	45.33	33.58
	87.22	61.72	40.21
	63.27	59.1	44.71
	66.29	50.33	50.48
	69.72	50	45.39
	97.88	80.52	33.33
	108.61	44.21	33.39
	78.72	51.64	40.08
	132.98	58.83	43.79
	125.05	45	54.73
	92.68	50.61	33.1
	95.4	98.82	31.56
	80.57	60.38	48.88
	67.63	57.3	48.36
	144.62	60.47	49.31
	80.16	44.79	45.57
	78.19	42.18	42.9
	108.54	96.01	37.43
	89.58	50	60.15
	127.59	105.1	55.78
	69.05	51.88	42.94
	97.63	69.81	60.51
	70.71	64.75	41.39
	86.52	49	63.32
	105.68	88.22	71.56
	92.48	85.7	72
	92.35	50.72	73.24
	101.88	52.97	73.7
	64.76	50.5	68.28
	151.98	52.3	81.78
	96.79	63.82	47.86
	84.63	55.53	37.3
	101.24	53.75	101.06
	70.46	56.18	87.19
	69.54	65.38	62.85
	72.21	95.29	62.47
	84.55	81.01	78.52
	80.12	54.38	95.83
	76.62	42.47	39.37
	63.36	77.72	51.94
	79.29	63.38	49.75
	72.18	51.05	92.85
	85.45	61.48	63.42
	67.54	61.6	51.06
	115.21	90.89	77.17
	95.2	69.02	48.27
	79.89	58.27	48.37
	71.29	53.36	44.04
	76.64	64.48	70.36
	63.71	72.39	83.65
	71.85	72.5	80.67
	116.43	82	40.7
	68.56	41.73	86.98
	61.14	48.69	47.73
	77.67	63.71	74.61
	94.95	65.52	44.71
	65.06	87.63	35.38
	93.65	56.57	41.35
	62.63	50.6	50.44
	82.34	47.32	75.05
	80.46	62.22	42
	108.59	68.29	46.95
	71.36	84.25	53.98
	96.16	60.02	48.71
	137.48	84.26	42.18
	72.11	54.28	48.8
	55.67	47.1	47.07
	60.27	78.85	58.78
	73.4	49.15	44
	146.52	56.07	73.35
	65	47.36	50.23
	100.92	55.53	46.81
	82.37	53.75	44.41
	68.2	56.18	48.83
	79.56	65.38	39.4
	65.18	95.29	52
	69.83	81.01	49.81
	69.72	54.38	43.88
	65.44	42.47	48.83
	63	77.72	36.45
	152.26	63.38	42.4
	98.08	51.05	49.53
	103.42	61.48	87.14
	85.68	61.6	52.91
	77.92	90.89	49.92
	58.08	69.02	50.67
	85.83	58.27	61.26
	144.73	53.36	47.4
	103.65	64.48	48.88
	101.67	72.39	48.36
	111.21	72.5	49.31
	108.07	82	45.57
	128.12	41.73	42.9
	125.89	48.69	37.43
	73.38	63.71	60.15
	66.66	65.52	55.78
	95.85	87.63	42.94
	66.4	56.57	60.51
	106.91	50.6	41.39
	112.71	47.32	63.32
	89.02	62.22	71.56
	58.21	68.29	72
	95.78	84.25	73.24
	85.81	60.02	73.7
	77.07	84.26	68.28
	111.76	54.28	81.78
	88.67	47.1	47.86
	102.41	78.85	37.3
	84.5	49.15	101.06
	61.83	56.07	87.19
	63.1	47.36	62.85
	94.92	38.84	62.47
	124.65	77.41	78.52
	63.38	30.2	95.83
	71.5	74.58	39.37
	96.58	46.37	51.94
	100.48	51.51	49.75
	96.4	50.33	92.85
	66.13	36.42	63.42
	81.77	54.34	51.06
	142.06	40.43	77.17
	71.17	29.35	48.27
	77.44	33.67	48.37
	170.35	39.64	44.04
	115.71	46.41	70.36
	172.63	42.92	83.65
	149.49	52.61	80.67
	79.56	32.96	40.7
	84.36	38.4	86.98
	150.53	77.7	47.73
	156.73	44.64	74.61
	161.33	37.71	44.71
	101.12	39.11	35.38
	92.8	38.79	41.35
	171.42	39.7	50.44
	116.41	35.75	75.05
	106.09	45.74	42
	118.04	46.51	46.95
	155.24	49.04	53.98
	108.65	36.71	48.71
	146.75	41.64	42.18
	141.17	42.03	48.8
	118.39	44.97	47.07
	95.65	38.2	58.78
	108	60.57	44
	114.13	37.2	73.35
	98.94	52.06	50.23
	149.57	35.68	46.81
	111.79	42.37	44.41
	84.1	52	48.83
	97.62	34.38	39.4
	50.94	44.5	52
	93.71	40.95	49.81
	52.78	36.63	43.88
	81.19	29.61	48.83
	53	47.88	36.45
	95.91	49.95	42.4
	95.2	58.11	49.53
	107.57	54.76	87.14
	46.96	29.55	52.91
	61.74	36.53	49.92
	138.64	38.86	50.67
	45.6	51.51	61.26
	49.37	48.98	47.4
	85.46	56.84	75.82
	74.4	68.18	92.61
	79	41.93	124.13
	55.45	46.04	103.94
	64.79	41.21	96.47
	90.54	36.37	65.63
	88.32	48.19	75.6
	90.41	30.94	108.39
	53.45	64.11	72.85
	99.85	39.82	89.55
	71.17	40.76	113.48
	73.49	45.81	95.55
	95.3	34.32	86.5
	65.34	36.03	141.75
	45.53	42.5	139.41
	81.34	60.65	92.45
	63.47	35.16	95.15
	74.12	48.06	110.31
	94.43	53.89	131.61
	100.41	62.68	111.87
	94.38	69.21	90.27
	55.74	46.23	144.73
	54.24	53.21	122.22
	73.57	87.38	84.19
	64.21	37.31	83.36
	61.2	58.76	70
	50.47	50.72	84.27
	79.34	49.73	151.43
	59.39	43.7	67.07
	58.9	40.18	139.38
	86.28	38.53	86.58
	70.68	111.4	143.53
	123.83	46.38	112.87
	126.48	64.85	69.33
	51.63	43.26	91.16
	66.77	51.17	120.92
	62.32	55.63	86.05
	63.7	38.09	136.88
	91.25	43.21	67.08
	67.5	42.94	121.73
	116.68	47.38	85.32
	117.43	53.79	76.9
	154.64	51.52	103.69
	182.84	47.5	102.23
	170.87	46.26	87.31
	176.03	38.84	76
	168.24	77.41	70.91
	114.07	30.2	71.57
	130.27	74.58	169.96
	124.31	46.37	108.92
	186.13	51.51	136.45
	167.15	50.33	67.46
	117.3	36.42	96.04
	124.52	54.34	86.78
	135.02	40.43	154.47
	209.61	29.35	162.29
	184.42	33.67	119.71
	141.86	39.64	112.48
	205.34	46.41	82.81
	193	42.92	141.09
	192.14	52.61	101.48
	94.12	32.96	95.7
	117.71	38.4	104.58
	107.07	77.7	137.52
	157.34	44.64	95.24
	188.12	37.71	77.1
	163.59	39.11	88.5
	128.1	38.79	155.2
	174.58	39.7	68.68
	212.84	35.75	64.62
	151.89	45.74	88.48
	207.22	46.51	98.25
	133.32	49.04	87.65
	197.54	36.71	86
	114.54	41.64	79.45
	120.74	42.03	85.21
	164.1	44.97	105.76
	121.56	38.2	105.31
	134.53	60.57	67.18
	190.63	37.2	108.42
	180.72	52.06	80.25
	111.06	35.68	82.5
	110.82	42.37	95.63
	193.28	52	95.88
	171.78	34.38	119.88
	170.07	44.5	99.72
	134.8	40.95	91.53
	127	36.63	77.45
	146.64	29.61	73.84
	99.8	47.88	104.86
	169.13	49.95	95.17
	133.78	58.11	145.97
	196.31	54.76	91.89
	170	29.55	84.33
	139.74	36.53	88.27
	164.91		81
	180.88		59.76
	176.35		156.11
	112.19		120.27
	182.42		106.94
	142.24		82.88
	135.15		88.81
	153.18		114.57
	142		114.02
	126.56		87.62
	137.76		104.6
	106.29		98.17
	110.42		120.8
	156.1		93.25
	175.02		161.96
	95.33		97.62
	140.99		105.51
	156.93		62.64
	123.38		118.47
	104.33		76.83
	148.33		84.36
	179.43		85.91
	186.76		66.83
	203.81		101.4
	186.05		85.25
	132.94		131.83
	106.23		77.87
	204.1		83.34
	190.13		96.86
	199.54		76.98
	194.39		83.07
	154.84		78.79
	189.29		132.43
	122.54		95.63
	147.97		93.79
	102.25		94.14
	137.63		75.71
	152.5		65.5
	124.5		69.59
	116.97		107.53
	207.04		67.5
	90.35		98.88
	186.61		74.1
	179.77		73.13
	101.8		82.7
	156.16		95.87
	153.32		78.06
	195.79		124.21
	147.02		99.64
	100		102.58
	134.78		87.53
	173.95		113.38
	148.16		87.43
	73.36		138.65
	87.03		115.96
	78.21		99.11
	71.54		69.76
	75.4		104.77
	67.82		78.86
	72.07		66.69
	96.69		129.2
	94.47		105.31
	96.55		91.75
	76.93		80.88
	106.48		63.5
	100.33		63.73
	64.1
	62.81
	86.03
	65.77
	67.25
	57.66
	52.58
	78.64
	103.05
	70.79
	129.77
	94.36
	119.57
	95.43
	95.73
	52
	99.42
	104.68
	55.88
	109.43
	74.35
	93.41
	109.81
	91.69
	40.42
	39.71
	53.33
	40.33
	28.81
	44.32
	79.85
	29.2
	35.27
	84.31
	52.55
	40.31
	37.83
	62.8
	48.71
	57.57
	41.9
	49.91
	44.08
	61.74
	49.62
	57.09
	38.78
	45.03
	41.48
	32.93
	46.87
	29.24
	45.36
	51.74
	45.82
	30.36
	35.6
	34.58
	29.9
	38.8
	38.55
	49.56
	44.05
	33.32
	34.12
	30.83
	41.69
	39.69
	62.38
	36.29
	37.26
	45.4
	45.63
	31.87
	37.05
	89.53
	95.65
	109.09
	153.52
	138.93
	103.94
	197.96
	106.63
	96.58
	83.3
	111.63
	144.74
	93.53
	180.75
	98.35
	96.14
	92.87
	167.17
	120.06
	80.95
	183.73
	154.53
	196.08
	102.69
	178.84
	181.69
	128
	88.25
	186.71
	109.57
	80.5
	87.21
	116.82
	108.52
	193.01
	119.39
	85.53
	174.27
	112.27
	189.48
	121.6
	105.52
	167.31
	111.93
	175.13
	141.89
	122.86
	184.39
	106.81
	112.47
	104.46
	99.63
	147.14
	131.65
	139.25
	106.12
	105.61
	114.29
	98
	167.64
	113.3
	176.65
	123.07
	181.94
	99.57
	187.46
	183
	79.04
	168.68
	150.08
	115.7
	188.98
	154.55
	179
	187.14
	180.86
	206.01
	148.1
	184.79
	114.52
	123.67
	107.35
	122
	90
	144.55
	158.98
	93
	99.16
	156.04
	139.45
	120.79
	92.44
	122.55
	85.75
	137.04
	99.08
	88.94
	88.4
	89.67
	116.44
	96.8
	92.05
	81.36
	93.85
	116.13
	86.7
	82.54
	156.05
	213.57
	173.45
	203.82
	162.44
	151.24
	125.13
	194.5
	142.75
	142.81
	195.21
	177.73
	182.04
	151
	158.3
	182.89
	180.66
	211.13
	204.48
	127.63
	154.11
	120.65
	181.31
	134.94
	167.13
	220.66
	184.35
	185.91
	187.16
	219.61
	188.07
	215.11
	208.35
	145.77
	225.69
	221.88
	200.25
	224.33
	167.05
	147.14
	139.43
	224.18
	201.05
	131.69
	188.45
	140.47
	178.44
	207.26
	211.76
	209.23
	137.55
	206.05
	138.14
	126.52
	102.82
	140.8
	174.68
	201.05
	142.5
	160.34
	188.48
	188.06
	166.76
	197.73
	138.88
	215.87
	181.08
	113.5
	203.69
	173.95
	202.49
	156.33
	165.79
	161.81
	170.15
	109.32
	186.07
	189.89
	157.94
	122.57
	123.9
	123.16
	170.4
	193.64
	132.05
	115.88
	195.11
	150.88
	170.81
	209.6
	189.44
	203.49
	197.06
	205.15
	219.96
	208.83
	201.42
	189.86
	142.35
	192.03
	231.78
	185.53
	172.3
	196.81
	130.63
	199.08
	132.2
	176.59
	188.21
	185.53
	213.96
	206.71
	177.49
	213.53
	214.41
	167.43
	131.24
	136.92
	164.35
	168.61
	178.03
	169.05
	188.18
	175.41
	209.42
	136
	190.15
	151.64
	227.31
	182.57
	167.76
	224.51
	151.95
	136.18
	175.41
	211.79
	191.04
	157.76
	185.11
	111.27
	161.36
	165.29
	144.88
	196.72
	204.21
	197.1
	193.72
	109.4
	105.54
	176.09
	216.29
	140.65
	199.16
	187.15
	121.08
	140
	128.2
	127.69
	157.47
	172.67
	112.87
	159.62
	176.88
	183
	168.93
	201.85
	162.24
	114.19
	165.15
	146.18
	132.35
	200.86
	187.47
	163.56
	120.9
	189.45
	183.55
	126.14
	174.59
	208.93
	202.47
	157.39
	152.29
	224.49
	147.26
	189.83
	220.43
	205.84
	224.46
	172.67
	195.05
	154.58
	205.13
	152.18
	230.9
	206.02
	120
	122.2
	143.41
	153.96
	132.92
	198.7
	180.33
	180.26
	172.7
	159.26
	173.88
	188.12
	120.42
	160.5
	175.19
	74.35
	66.89
	63.67
	58.14
	68.38
	64.1
	60.76
	76.93
	72.65
	76.91
	65
	76.16
	72.96
	57
	71.1
	94.74
	91.55
	72.83
	61.47
	86.34
	51.51
	85.19
	55.2
	136.74
	50.62
	70.72
	61.59
	78.38
	60.2
	74.13
	70.81
	86.46
	48.8
	64.24
	88.11
	115.97
	52.02
	63.67
	120.2
	135.13
	114.15
	64.86
	61
	67.74
	103.5
	93.92
	110.33
	100.96
	100.5
	84.19
	59.31
	72.18
	68.75
	72.43
	73.61
	56.55
	55.8
	109.89
	82.9
	110.84
	101.45
	107.56
	72.84
	73.49
	83.82
	72
	74.17
	102.23
	79.49
	100.87
	71.48
	72.3
	100.42
	65.3
	82.27
	117.89
	75.96
	61.73
	86.4
	102.04
	85.41
	86.02
	63
	93.79
	76.74
	79.32
	110.42
	62.14
	61.82
	169.37
	110.08
	113.5
	63.01
	104.4
	121.2
	118.7
	74.01
	96.06
	72.59
	71.43
	110
	59.33
	65.63
	53.92
	85.07
	62.42
	111.44
	120.52
	106.15
	116.49
	127.3
	138.06
	155.36
	153.19
	155.83
	185.35
	157.15
	98.95
	123.45
	96.67
	158.01
	89.08
	82.33
	123.67
	136.37
	138.8
	104.13
	98.55
	177.76
	147.38
	110.56
	86.69
	142.17
	88.86
	132.92
	93.81
	88.79
	109.45
	89
	92.52
	130.53
	128.8
	96
	98.17
	114.08
	98.21
	102.53
	92.4
	200.06
	154.92
	134.67
	151.96
	190.51
	159.1
	139.4
	168.05
	123.64
	159.07
	119.91
	130.63
	103.33

## Sheet: Figure 4U-mature CPL-1 in eat-2
	% of mature CPL-1
		WT				eat-2(ad1116)
	Day 1	75.4274	64.123	63.3296		79.2931	93.5866	91.3932
	Day 5	59.6543	65.4568	49.8125		63.2832	82.3476	79.056
	Day 9	57.0722	46.7215	39.0123		68.0429	60.3216	78.921
The numerical data are analyzed by GraphPad Prism 6 and represented as a bar graph in Figure 4U.

## Sheet: Figure 4W-mature CPL-1 in isp-1
		% of mature CPL-1
			WT			isp-1(qm150)
		Day 1	69.4407	65.5927	71.4274	87.1263	75.9043	93.8521
		Day 5	44.0496	39.6543	58.722	82.4889	91.8296	57.4153
		Day 9	47.1352	47.6944	50.386	62.3669	44.2074	53.89
		The numerical data are analyzed by GraphPad Prism 6 and represented as a bar graph in Figure 4W.
