# Supplementary material for: Lysosome activity is modulated by multiple longevity pathways and is important for lifespan extension in C. elegans
Source: eLife. 2020 Jun 2;9:e55745. doi: 10.7554/eLife.55745 (PMC7274789; doi:10.7554/eLife.55745)
Supplement: Figure 5—source data 1. [file elife-55745-fig5-data1.xlsx]

## Sheet: Figure 5B-C-declined genes
	Gene	Relative mRNA level at Day 5			Mean(Day 5 vs Day 1)	SD(Day 5 vs Day 1)	Description
lysosomal membrane protein	lmp-2	0.463187	0.652025	0.487227	0.534146	0.102791	one of two C. elegans LAMP (lysosomal associated membrane glycoprotein) homologs
	ncr-1	0.725476	0.649	0.542239	0.638905	0.0920347	orthologous to human NPC1
	slc-36.2	0.454127	0.520872	0.705749	0.560249	0.130351	Proton-coupled amino acid transporter
V0 subunits	vha-2	0.564091	0.614293	0.606887	0.59509	0.0271004	an ortholog of subunit c of the membrane-bound (V0) domain of vacuolar proton-translocating ATPase (V-ATPase)
	vha-3	0.283811	0.230792	0.566638	0.360414	0.180552	an ortholog of subunit c of the membrane-bound (V0) domain of vacuolar proton-translocating ATPase (V-ATPase)
	vha-4	0.663576	0.564613	0.825306	0.684498	0.1316	an ortholog of subunit c'' of the membrane-bound (V0) domain of vacuolar proton-translocating ATPase (V-ATPase)
	vha-5	0.16728	0.271307	0.288471	0.242353	0.0655788	an ortholog of subunit a of the membrane-bound (V0) domain of vacuolar proton-translocating ATPase (V-ATPase)
	vha-6	0.29937	0.339778	0.305448	0.314865	0.021788	an ortholog of subunit a of the membrane-bound (V0) domain of vacuolar proton-translocating ATPase (V-ATPase)
	vha-16	0.40239	0.58927	0.848802	0.613487	0.224189	an ortholog of subunit d of the membrane-bound (V0) domain of vacuolar proton-translocating ATPase (V-ATPase)
	vha-17	0.809442	0.647372	0.663882	0.706899	0.089188	an an ortholog of subunit e of the membrane-bound (V0) domain of vacuolar proton-translocating ATPase (V-ATPase)
	vha-19	0.383864	0.771818	0.36619	0.507291	0.229258	an ortholog of subunit Ac45 of the membrane-bound (V0) domain of vacuolar proton-translocating ATPase (V-ATPase)
V1 subunits	vha-8	0.448133	0.393927	0.598739	0.480266	0.10612	an ortholog of subunit E of the cytoplasmic (V1) domain of vacuolar proton-translocating ATPase (V-ATPase)
	vha-10	0.215237	0.552227	0.639271	0.468912	0.223958	an ortholog of subunit G of the cytoplasmic (V1) domain of vacuolar proton-translocating ATPase (V-ATPase)
	vha-11	0.216835	0.404814	0.554592	0.39208	0.169238	an ortholog of subunit C of the cytoplasmic (V1) domain of vacuolar proton-translocating ATPase (V-ATPase)
	vha-12	0.045996	0.306721	0.496546	0.283088	0.226203	an ortholog of subunit B of the cytoplasmic (V1) domain of vacuolar proton-translocating ATPase (V-ATPase)
	vha-13	0.63266	0.356012	0.347319	0.44533	0.162291	an ortholog of subunit A of the cytoplasmic (V1) domain of vacuolar proton-translocating ATPase (V-ATPase)
	vha-14	0.445347	0.44125	0.730776	0.539124	0.165988	an ortholog of subunit D of the cytoplasmic (V1) domain of vacuolar proton-translocating ATPase (V-ATPase)
	vha-15	0.361901	0.293344	0.513345	0.38953	0.112573	an ortholog of subunit H of the cytoplasmic (V1) domain of vacuolar proton-translocating ATPase (V-ATPase)
Protease(cathespin)	ctsa-1	0.299924	0.13199	0.438607	0.290174	0.153541	an ortholog of human CTSA (cathepsin A)
	Y40D12A.2	0.186921	0.331	0.529242	0.349054	0.171873	an ortholog of human CTSA (cathepsin A)
	K10C2.1	0.719217	0.409	0.745354	0.624524	0.187106	an ortholog of human CTSA (cathepsin A)
	Y16B4A.2	0.5	0.322	0.41972	0.413907	0.0891423	an ortholog of human CTSA (cathepsin A)
	F32A5.3	0.265816	0.278	0.532369	0.358728	0.150501	an ortholog of human CTSA (cathepsin A)
	K10B2.2	0.324547	0.284	0.323424	0.310657	0.0230925	an ortholog of human CTSA (cathepsin A)
	ctsd-1(asp-1)	0.457232	0.223808	0.275667	0.318902	0.122571	a homolog of cathepsin D aspartic protease
	asp-3	0.343049	0.587435	0.51889	0.483125	0.126057	an aspartyl protease homolog
	asp-4	0.62579	0.377546	0.457697	0.487011	0.126692	an aspartyl protease homolog
	asp-8	0.650897	0.830182	0.257742	0.579607	0.292803	an aspartyl protease homolog
	cpr-5	0.137167	0.146503	0.264988	0.182886	0.0712555	an ortholog of human CTSB (cathepsin B)
	cpr-6	0.310716	0.32511	0.444627	0.360151	0.0735115	an ortholog of human CTSB (cathepsin B)
	cpr-8	0.48515	0.360857	0.117522	0.321176	0.186999	an ortholog of human CTSB (cathepsin B)
	cpl-1	0.343806	0.330335	0.350868	0.34167	0.0104319	a member of the cathepsin L-like cysteine protease family
	cpz-1	0.252321	0.324397	0.260436	0.279051	0.0394796	a homolog of cathepsin z-like cysteine protease
	tag-196	0.345558	0.400118	0.764984	0.503553	0.228043	an ortholog of human CTSF
	Y40H7A.10	0.725	0.477145	0.672217	0.624787	0.130557	an ortholog of human CTSO
Non-protease hydrolase	asm-1	0.636545	0.400258	0.489187	0.508663	0.119341	similar to human acid sphingomyelinase (ASM) or sphingomyelin phosphodiesterase
	sul-3	0.570975	0.361279	0.419575	0.45061	0.108238	orthologous to the human gene ARYLSULFATASE B
	hex-5	0.262156	0.3942	0.254282	0.303546	0.0786073	a beta-N-acetylhexosaminidase
	gba-3	0.140178	0.13167	0.596048	0.289299	0.265687	homologous to to the human gene GLUCOCEREBROSIDASE
	gba-4	0.228379	0.396666	0.548286	0.39111	0.160026	homologous to to the human gene GLUCOCEREBROSIDASE
	Y105E8B.9	0.167086	0.164672	0.182399	0.171386	0.0096139	orthologous to the human gene GLUTATHIONE TRANSFERASE ZETA 1
	pho-1	0.105258	0.366656	0.273194	0.248369	0.132455	acid phosphatase
	lipl-7	0.431819	0.493341	0.379981	0.435047	0.0567489	an ortholog of members of the human Lipases family
	The numerical data are analyzed by GraphPad Prism 6 and represented as a bar graph in Figure 5 B-C.

## Sheet: Figure 5D-up-regulated-daf-2 
Day 1	up-regulated(20 out of 43)	daf-2 vs WT
	lysosomal genes	relative mRNA level of lysosomal genes			Mean	SD
	lmp-2	2.58381	2.86692	3.78423	3.07832	0.62751
	slc-36.2	3.50642	1.5042	3.16894	2.72652	1.07193
	ncr-1	5.10354	4.5932	3.22098	4.30591	0.973611
	vha-5	2.52471	1.83515	2.55797	2.30594	0.40806
	vha-10	3.50278	2.49926	3.08442	3.02882	0.504067
	vha-14	2.00764	2.16837	2.9363	2.37077	0.496314
	ctsa-1	3.47135	5.43394	6.06707	4.99079	1.35341
	Y40D12A.2	2.31097	2.528	2.27758	2.37218	0.135974
	Y16B4A.2	1.8784	1.92319	2.18556	1.99571	0.165927
	K10B2.2	1.73207	2.12653	2.37924	2.07928	0.326159
	asp-3	1.4799	3.74769	3.17884	2.80214	1.17989
	asp-4	3.6642	2.4158	4.37718	3.48573	0.992796
	asp-8	4.35146	3.47738	8.56824	5.46569	2.7222
	tag-196	3.36125	2.73449	3.02941	3.04172	0.313563
	gba-3	5.6883	2.70382	5.27933	4.55715	1.618
	hex-5	2.71305	3.55488	3.85706	3.37499	0.592839
	Y105E8B.9	2.609	2.93732	2.14542	2.56391	0.397871
	asm-1	1.76296	1.78864	1.78554	1.77905	0.0140205
	sul-3	1.42306	2.51341	3.63008	2.52218	1.10353
	lipl-7	2.97232	3.57303	1.54133	2.69556	1.04374
	The numerical data are analyzed by GraphPad Prism 6 and represented as a bar graph in Figure 5D.

## Sheet: Figure 5E-up-regulated-eat-2
		Day 1	up-regulated(out of 43)	isp-1 vs WT
			lysosomal genes	relative mRNA level of lysosomal genes			Mean	SD
			vha-8	2.90996	4.39678	2.88678	3.39784	0.865187
			ctsa-1	11.4995	15.986	10.5433	12.6762	2.90589
			Y40D12A.2	6.60931	11.1935	5.39281	7.73186	3.05892
			asp-4	3.78336	2.23071	1.22585	2.41331	1.2885
			asp-8	3.56345	3.31958	5.94893	4.27732	1.45278
			cpr-8	5.50408	1.92695	2.97322	3.46808	1.83919
			asm-1	2.15322	2.73429	2.9783	2.62194	0.423858
			sul-3	3.07633	5.28887	2.48382	3.61634	1.47844
			Y105E8B.9	3.30884	5.5535	2.90871	3.92368	1.42557
			lipl-7	2.62754	2.37585	4.1611	3.05483	0.966288
			The numerical data are analyzed by GraphPad Prism 6 and represented as a bar graph in Figure 5E.

## Sheet: Figure 5F-up-regulated-isp-1
	Day 1	up-regulated(out of 43)	eat-2 vs WT
		lysosomal genes	relative mRNA level of lysosomal genes			Mean	SD
		lmp-2	5.31658	2.19771	3.36359	3.62596	1.5759
		slc-36.2	1.65692	2.10162	2.03426	1.93093	0.239681
		ncr-1	1.63694	2.12994	3.02618	2.26435	0.704307
		vha-2	1.66844	2.2548	1.80201	1.90842	0.307321
		vha-3	2.45651	1.92987	3.12857	2.50498	0.600818
		vha-4	2.55831	1.39813	2.41664	2.12436	0.632909
		vha-6	3.84105	1.28521	2.68794	2.60473	1.27995
		vha-19	1.95477	1.80313	2.10348	1.95379	0.150178
		vha-8	2.31177	2.4402	3.41409	2.72202	0.602777
		vha-12	1.30994	1.96156	2.6217	1.9644	0.655884
		vha-15	2.55089	2.08927	2.95468	2.53161	0.433023
		Y105E8B.9	3.19098	6.2832	5.30306	4.92575	1.58026
		pho-1	2.15472	5.86748	2.74442	3.58887	1.99524
		lipl-7	6.26341	12.7703	4.426	7.81989	4.38447
		The numerical data are analyzed by GraphPad Prism 6 and represented as a bar graph in Figure 5F.
