# Supplementary material for: Lysosome activity is modulated by multiple longevity pathways and is important for lifespan extension in C. elegans
Source: eLife. 2020 Jun 2;9:e55745. doi: 10.7554/eLife.55745 (PMC7274789; doi:10.7554/eLife.55745)
Supplement: Figure 6—figure supplement 1—source data 1. [file elife-55745-fig6-figsupp1-data1.xlsx]

## Sheet: Figure 6-S1B-genes in daf-2;TF 
		The numerical data are analyzed by GraphPad Prism 6 and represented as a bar graph in Figure 6-supplemental IB.
		daf-16;daf-2 vs daf-2						daf-2;skn-1 vs daf-2							daf-16;daf-2;skn-1 vs daf-2
	lysosomal genes	relative mRNA level of lysosomal genes			Mean	SD		relative mRNA level of lysosomal genes			Mean	SD			lysosomal genes	relative mRNA level of lysosomal genes			Mean	SD
	lmp-2	0.287872	0.233906	0.534218	0.351999	0.160097		0.224067	0.743807	0.604368	0.524081	0.269011			lmp-2	0.644164	0.261044	0.43298	0.446063	0.191895
	slc-36.2	0.450938	0.283123	0.606677	0.446913	0.161815		2.41747	2.45547	1.54168	2.13821	0.51696			vha-10	0.799406	0.779316	0.753921	0.777548	0.022794
	ncr-1	0.249049	0.340587	0.582973	0.39087	0.172547		2.36281	1.66613	1.95143	1.99345	0.350234			asp-3	0.319968	0.315987	0.122279	0.252745	0.113004
	vha-5	0.546389	0.561555	0.642603	0.583516	0.0517299		6.18811	5.2535	8.19923	6.54695	1.50529			asp-4	0.622437	0.373156	0.598201	0.531265	0.137461
	vha-10	0.336925	0.365008	0.564091	0.422008	0.123846		0.693035	0.7508	0.79369	0.745842	0.0505104			tag-196	0.383819	0.236492	0.403892	0.341401	0.0914066
	vha-14	1.11806	0.717972	0.979081	0.938372	0.203128		0.265724	0.362361	0.466718	0.364934	0.100522			gba-3	0.284303	0.350094	0.237465	0.290621	0.0565796
	ctsa-1	0.440587	0.63826	0.178748	0.419198	0.230501		5.80711	2.85059	7.69277	5.45015	2.44074
	Y40D12A.2	0.914046	0.810565	1.21125	0.978621	0.208003		1.38944	1.11767	1.17308	1.22673	0.143605
	Y16B4A.2	1.24404	0.231727	1.4206	0.965455	0.64153		0.093105	0.097801	0.163461	0.118122	0.0393346
	K10B2.2	0.984184	1.02243	0.71425	0.906955	0.167979		1.13958	0.662869	0.796088	0.866179	0.245963
	asp-3	0.521009	0.528509	0.439825	0.496448	0.0491799		0.301661	0.69713	0.269153	0.422648	0.238263
	asp-4	0.305978	0.332863	0.162668	0.26717	0.091494		0.119162	0.099891	0.108668	0.10924	0.00964824
	asp-8	0.795674	0.943438	0.711532	0.816881	0.117399		3.30122	4.13963	3.12206	3.52097	0.543208
	tag-196	0.725174	0.114348	0.262884	0.367469	0.31856		0.259355	0.529955	0.596254	0.461855	0.178475
	gba-3	0.432569	0.182947	0.185823	0.267113	0.143296		0.418849	0.174162	0.425432	0.339481	0.143208
	hex-5	0.109219	0.193245	0.151827	0.15143	0.0420143		0.893245	1.71597	0.458416	1.02254	0.63867
	Y105E8B.9	1.16941	1.55401	2.24544	1.65629	0.54526		3.87179	3.34175	5.59446	4.26933	1.1778
	asm-1	1.06526	0.176777	0.345798	0.529279	0.471805		0.609416	1.22014	1.1921	1.00722	0.344792
	sul-3	0.346853	0.066546	0.398044	0.270481	0.178458		0.301765	0.32417	1.805	0.810312	0.861499
	lipl-7	0.178342	0.124137	0.063795	0.122091	0.0573009		2.46656	3.67235	1.26759	2.46883	1.20239

## Sheet: Figure 6-S1L-daf-2;hlh-30
			daf-2;hlh-30 vs daf-2
		lysosomal genes	relative mRNA level of lysosomal genes			Mean	SD
		lmp-2	0.618351	1.07438	0.909152	0.867293	0.230877
		slc-36.2	0.688486	1.08373	0.777581	0.849931	0.207315
		ncr-1	1.45196	0.467164	0.626332	0.848485	0.528648
		vha-5	1.41814	1.70173	0.492433	1.2041	0.632422
		vha-10	0.421762	1.46917	0.719717	0.870216	0.539678
		vha-14	1.04211	0.627854	0.856189	0.842049	0.207487
		ctsa-1	0.913831	1.62057	1.83846	1.45762	0.483374
		Y40D12A.2	1.98687	0.630689	0.786217	1.13459	0.74218
		Y16B4A.2	1.18263	0.968282	0.718534	0.956482	0.232273
		K10B2.2	1.16959	1.41177	0.986233	1.1892	0.213443
		asp-3	0.533663	0.390393	0.360482	0.428179	0.0925676
		asp-4	1.08862	0.978063	1.1765	1.08106	0.0994327
		asp-8	0.456441	0.475494	1.21925	0.717063	0.435015
		tag-196	0.238738	0.548856	0.850158	0.545917	0.305721
		gba-3	0.299785	0.376834	0.382757	0.353125	0.0462889
		hex-5	0.138838	0.605207	0.475494	0.406513	0.240715
		Y105E8B.9	0.350261	0.506102	0.365193	0.407185	0.0859891
		asm-1	0.440435	0.861547	1.06259	0.78819	0.317498
		sul-3	0.898873	1.38585	0.817692	1.03414	0.307283
		lipl-7	0.558643	0.287092	0.62326	0.489665	0.178384
		The numerical data are analyzed by GraphPad Prism 6 and represented as a bar graph in Figure 6-supplemental IL.

## Sheet: Figure 6-S1M-cleaved CHERRY
	% of NUC-1:: CHERRY cleavage
	WT							daf-2(e1370)								daf-16;daf-2					daf-2;hlh-30					daf-16;daf-2;hlh-30
	56.886	66.617	59.6362	45.5495	62.3841	56.4189	63.6539	90.2179	77.449	70.3333	77.1052	82.726	70.6378	75.5576	78.6327	54.422	47.1759	30.2356	38.6828	52.5572	65.0291	72.1525	69.3561	76.7509	79.6363	62.9608	75.0862	65.3021
	The numerical data are analyzed by GraphPad Prism 6 and represented as a bar graph in Figure 6-supplemental IM.

## Sheet: Figure 6-S1N-hsf-1;daf-2
		hsf-1;daf-2 vs daf-2
	lysosomal genes	relative mRNA level of lysosomal genes			Mean	SD
	lmp-2	0.455203	0.737901	1.175	0.789368	0.362647
	slc-36.2	1.11745	1.10509	0.802826	1.00845	0.178185
	ncr-1	0.513575	0.588561	1.35896	0.820364	0.467939
	vha-5	0.981864	0.834338	1.13187	0.98269	0.148767
	vha-10	0.730938	0.629959	0.766219	0.709039	0.0707205
	vha-14	1.02209	1.05965	1.47794	1.18656	0.253039
	ctsa-1	0.982811	0.897821	1.17243	1.01769	0.140587
	Y40D12A.2	0.425056	0.951916	0.485991	0.620988	0.288207	The numerical data are analyzed by GraphPad Prism 6 and represented as a bar graph in Figure 6-supplemental IN.
	Y16B4A.2	1.1798	2.0096	1.36367	1.51769	0.435811
	K10B2.2	1.02348	0.590701	0.963263	0.859148	0.234424
	asp-3	0.450269	2.31097	1.58118	1.44747	0.937529
	asp-4	0.751429	0.357496	0.487847	0.532257	0.200686
	asp-8	0.432347	1.09923	0.752884	0.761489	0.333527
	tag-196	0.902835	0.665872	0.721199	0.763302	0.123965
	gba-3	1.08993	0.874979	0.919435	0.961448	0.113467
	hex-5	1.91038	0.603113	1.64947	1.38765	0.691843
	Y105E8B.9	0.550149	0.762337	0.957603	0.756696	0.203786
	asm-1	3.30814	0.69423	0.988838	1.66374	1.43169
	sul-3	0.698257	1.52264	0.726519	0.982471	0.468011
	lipl-7	1.23027	0.813927	1.08072	1.04164	0.210904

## Sheet: Figure 6-S1O-cleaved CHERRY
		% of NUC-1:: CHERRY cleavage
		WT					daf-2(e1370)					hsf-1(sy441)					hsf-1;daf-2
		42.7402	53.6222	62.3841	56.4189		76.5898	73.4449	77.1052	82.726	70.6378	61.7883	42.2863	50.057			80.4073	78.2918	67.4254	64.1934	66.7698
		The numerical data are analyzed by GraphPad Prism 6 and represented as a bar graph in Figure 6-supplemental IO.
