# Supplementary material for: Lysosome activity is modulated by multiple longevity pathways and is important for lifespan extension in C. elegans
Source: eLife. 2020 Jun 2;9:e55745. doi: 10.7554/eLife.55745 (PMC7274789; doi:10.7554/eLife.55745)
Supplement: Figure 6—source data 1. [file elife-55745-fig6-data1.xlsx]

## Sheet: Figure 6A-B-genes in daf-2;TFs
		daf-16;daf-2 vs daf-2						daf-2;skn-1 vs daf-2
	lysosomal genes	relative mRNA level of lysosomal genes			Mean	SD		relative mRNA level of lysosomal genes			Mean	SD
	lmp-2	0.287872	0.233906	0.534218	0.351999	0.160097		0.224067	0.743807	0.604368	0.524081	0.269011
	slc-36.2	0.450938	0.283123	0.606677	0.446913	0.161815		2.41747	2.45547	1.54168	2.13821	0.51696
	ncr-1	0.249049	0.340587	0.582973	0.39087	0.172547		2.36281	1.66613	1.95143	1.99345	0.350234
	vha-5	0.546389	0.561555	0.642603	0.583516	0.0517299		6.18811	5.2535	8.19923	6.54695	1.50529
	vha-10	0.336925	0.365008	0.564091	0.422008	0.123846		0.693035	0.7508	0.79369	0.745842	0.0505104
	vha-14	1.11806	0.717972	0.979081	0.938372	0.203128		0.265724	0.362361	0.466718	0.364934	0.100522
	ctsa-1	0.440587	0.63826	0.178748	0.419198	0.230501		5.80711	2.85059	7.69277	5.45015	2.44074
	Y40D12A.2	0.914046	0.810565	1.21125	0.978621	0.208003		1.38944	1.11767	1.17308	1.22673	0.143605
	Y16B4A.2	1.24404	0.231727	1.4206	0.965455	0.64153		0.093105	0.097801	0.163461	0.118122	0.0393346
	K10B2.2	0.984184	1.02243	0.71425	0.906955	0.167979		1.13958	0.662869	0.796088	0.866179	0.245963
	asp-3	0.521009	0.528509	0.439825	0.496448	0.0491799		0.301661	0.69713	0.269153	0.422648	0.238263
	asp-4	0.305978	0.332863	0.162668	0.26717	0.091494		0.119162	0.099891	0.108668	0.10924	0.00964824
	asp-8	0.795674	0.943438	0.711532	0.816881	0.117399		3.30122	4.13963	3.12206	3.52097	0.543208
	tag-196	0.725174	0.114348	0.262884	0.367469	0.31856		0.259355	0.529955	0.596254	0.461855	0.178475
	gba-3	0.432569	0.182947	0.185823	0.267113	0.143296		0.418849	0.174162	0.425432	0.339481	0.143208
	hex-5	0.109219	0.193245	0.151827	0.15143	0.0420143		0.893245	1.71597	0.458416	1.02254	0.63867
	Y105E8B.9	1.16941	1.55401	2.24544	1.65629	0.54526		3.87179	3.34175	5.59446	4.26933	1.1778
	asm-1	1.06526	0.176777	0.345798	0.529279	0.471805		0.609416	1.22014	1.1921	1.00722	0.344792
	sul-3	0.346853	0.066546	0.398044	0.270481	0.178458		0.301765	0.32417	1.805	0.810312	0.861499
	lipl-7	0.178342	0.124137	0.063795	0.122091	0.0573009		2.46656	3.67235	1.26759	2.46883	1.20239
	The numerical data are analyzed by GraphPad Prism 6 and represented as a bar graph in Figure 6A-B.

## Sheet: Figure 6K-pHtomato
	Average intensity of pHtomato
	Control RNAi				skn-1 RNAi
	WT	daf-2	daf-16	daf-16;daf-2	WT	daf-2	daf-16	daf-16;daf-2
	63.85	24.1	93.13	54.27	180.6	13.75	127.03	49.29
	48.13	24.78	91	48.71	174.06	22.47	152.29	62.28
	54.96	38.42	72	56.6	93.8	15.46	95.33	45.59
	46.53	31.61	64.3	54.69	167.65	16	168.62	49.94
	48.38	22.06	86.13	50.4	173.03	24.79	127.06	44.41
	59.27	40.08	75.38	53.79	168.95	21.15	78.18	96.57
	73.74	19.35	55.5	45.92	147.74	16.35	103.15	69.08	The numerical data are analyzed by GraphPad Prism 6 and represented as a bar graph in Figure 6K.
	59.56	39	113.92	52.51	119.11	19.34	83.15	40
	37.92	33.06	110.81	93.36	113.25	25.41	99.84	51.18
	66.72	32.56	64.6	126.42	161.61	17.4	81.86	68.89
	69.03	22.5	164.08	56.36	161.92	28.38	116.3	51.5
	43.62	34.98	97.23	60.08	174.75	38.03	86.36	53.25
	89.52	27.92	73.28	51.45	179.78	16.07	142.58	80.86
	47.68	25.78	140.19	56.72	124.9	12.73	150.51	83.01
	83.1	29.07	78	83.44	132.78	18.58	160.33	74.35
	51.86	27.08	93.07	94.85	102.47	22.41	72.7	107
	48.37	30.22	79.58	101.81	147.75	18.95	132.24	83.24
	48.33	36.18	79.53	85.19	100.79	14.49	101.59	56.34
	41.32	30.4	66.89	87.62	119.61	21.21	118.72	46
	50.56	55.8	92.5	47.18	143.11	25.81	86.97	47.46
	42.08	47.72	153.18	82	146.71	14.1	81.21	54.9
	45.5	26.97	124.3	51.6	167.76	14.69	83.63	80.4
	69.15	29.91	104.75	91.39	146.67	28.12	122.38	119.1
	122.73	42.82	61.8	84.91	110.13	21.72	87.92	54.67
	42.17	29.23	80.32	100.96	117.54	15.57	102.1	64.58
	71.82	23.73	65.23	77.31	113.39	24.97	140.95	77.85
	52.15	23.64	145.48	62.79	156.98	17.38	94.67	57.64
	77.22	34.37	84.36	72.21	122.05	46.64	78.77	77.27
	77.16	30.1	61.05	69.57	142.82	42.57	81.6	81.15
	37.7	35.73	91.85	63.07	181.43	52.15	136.39	78.13
	54.04	55.23	62.8	63.6	97.16	41.55	85.13	87.25
	53.58	35.17	66.92	57.2	173.82	49.29	121.9	45.79
	102.95	26.6	87.34	64.19	214.37	64.52	173.71	55.08
	69.06	46.36	124.91	63.39	176.29	46.44	89.25	67.92
	86.26	55.63	64.5	50.07	173.1	51.11	171	74.04
	55.4	59.21	82.04	52.92	99.13	95.59	142.32	63.77
	55.78	38.65	72.58	50.07	107.76	46.59	106.76	56.25
	47.74	24	121.08	56.28	209.24	37.36	196.3	65.07
	58.87	34.24	101.43	58.52	132.67	52.61	89.6	66.62
	71.29	41.2	81.63	53.06	114.54	54.42	104.87	72.23
	91.49	31.75	121	62.35	174.3	80.27	190.22	82.98
	70.62	34.54	102.8	56.26	128.81	55.36	173.5	72.44
	170.49	44.59	89.9	81.87	110.5	40.34	107.74	37.91
	70.05	58.41	76.82	50.39	200.78	57.11	119.12	57.91
	94.92	35.92	122.88	66.8	178.24	46.81	140.76	59.42
	89.65	30.75	60.69	85.44	108.28	87.86	91.71	45.24
	110.34	58.66	86.65	57.9	165.22	79.53	85.58	68.19
	87.29	30.08	100.28	83.33	98.71	49.6	109.88	86.1
	156.8	33.76	68.42	47.34	108.47	65.36	92	67.21
	73.62	32.49	145.88	104.97	113.83	43.8	106.74	63.36
	103.73	30.09	84.67	50.7	181.79	41.35	170.36	38.64
	70.63	28.64	116.11	76.35	117.26	53.43	80.47	49.29
	129.87	35.73	65.92	86.02	99.29	36.58	81.28	38.94
	69.73	33.7	65.23	68.28	126.75	37.56	177.7	41.67
	77.08	46.53	103.25	75.77	104.12	79.68	102.03	65.81
	67.04	28.2	65.35	73.72	94.82	77.58	173.46	69.48
	85.28	43.4	80.23	83.77	100.94	100.5	153.85	48.35
	79.7	27.22	72.03	58.92	130.71	186.94	105	71.86
	150.31	31.94	60.53	56.85	125.38	119.29	85.73	57.59
	83.52	27.85	119.76	68.33	148.69	71.73	175.19	45.35
	73.31	57.67	170.72	88.92	153.83	88.83	97.81	60.07
	108.56	42.4	66.4	63.56	128.01	70	117.9	71.62
	41.24	33.78	115.81	47.9	173.06	81.53	164.45	69.73
	45.27	54.01	69.3	76.46	190.79	60.43	148.2	40.55
	60.52	39.99	138.31	82.23	149.26	63.29	172.33	40.17
	63.08	40.5	133.09	80.09	128.83	62.5	175.42	69.24
	61.5	27.78	77.8	72.64	154.82	88.91	105.5	66.92
	51.26	30.19	82.07	69.84	102.76	87.07	139.67	44.83
	42.81	31.84	106.38	89.34	182.38	56.9	155.83	80.31
	56.46	31.88	163.97	76.78	76.55	135.79	184.48	63.14
	57.86	30.94	71.56	57.83	122.67	67.46	190.1	71.44
	46.42	26.96	76	61	102.46	80	130.2	45.24
	46.68	31.21	68.71	47.1	148.7	91.71	184.05	45.25
	80.32	12.16	103.55	96.85	138.16	97.14	186.21	62.3
	74.59	12.06	160.33	53.13	114.5	64.53	86.3	62.59
	80.94	11.83	96.8	45.78	126.06	79.82	107	58.63
	54.21	12.75	67.09	96.03	105.6	60	136.21	90.41
	54.32	13.63	156.52	48	86.5	177.62	138.93	49.58
	43.89	12.24	64.52	51.67	126.21	94.64	114.14	51.2
	91.06	11.23	74.62	60.05	104.5	96.33	163.4	42.05
	103.97	14.89	71.93	93.5	109.81	99.14	130.78	61.54
	49.76	12.81	70.73	118.39	160.52	118.75	113.48	52.96
	56.8	10.58	150.35	64.73	124.56	107.9	134.71	45.98
	60.95	15.62	131.42	66.25	108.67	97.53	145.29	65.96
	54.82	27.45	151	61.61	195.39	99.98	154.79	118.73
	61.17	11.83	114.68	82.68	120.06	109.26	103.63	80.13
	90.03	13	164.98	58.64	125.91	205.85	184.2	95.61
	77.93	17.49	108.14	43.25	112.77	94.09	85.71	49.13
	83.03	24.28	155.32	91.7	135.84	191.52	90.38	54.88
	50.09	19.82	109.45	47.92	115.27	161.32	154.96	73.49
	74.81	12.73	197.69	53.76	133.94	167.21	100.24	52.1
	56.64	12.73	153.27	87.22	160.49	173.77	140.13	87.74
	49.12	14.65	139.55	64.63	99.01	165.81	135.21	56.63
	42.1	9.86	118.37	95.69	207.79	176.37	177.53	65.04
	61.48	20.05	102.23	86.71	192.29	75.17	136.64	70.68
	42	16.29	135.2	62.6	110.43	79.23	108.73	108.17
	59.77	12.77	112.17	80.52	90.16	83.24	152.42	40.4
	48.32	15.44	188.49	71.82	97.76	73	170.6	53.32
	51.6	20.99	153.82	103.17	83.38	68.36	38.9	68.81
	68.71	10.3	98.53	72.18	167.75	95.73	43.5	50.39
	56.62	15.13	140.19	111.28	91.15	112.63	75.02	52.53
	74.75	16.81	114.07	77.7	123.04	113.94	59.27	51.7
	48.73	9.79	209.63	89.78	94.29	85.84	40.68	86.33
	40.2	11.71	214	101.43	80.45	123.66	47.28	76.67
	38.1	104.04	99	75.34	98.42	106.84	46.64	73.44
	45.01	61.94	190.96	118.95	119.7	122.31	56.96	70.3
	58.05	58.59	152.16	83.63	52.83	84.96	32.9	109.54
	47.36	51.2	106.85	102.22	69.38	67.3	45.6	88.5
	39.02	66.67	180.61	134.62	52.43	73.06	64.64	71.48
	52.59	56.54	161.37	76.91	63.44	83.94	64.07	101.35
	54.68	72.83	108.16	82.6	53.8	74.54	94.24	85.61
	51.82	88.44	151.46	66.03	77.78	65.48	43.38	66.52
	64.22	91.68	175.08	123.34	57.6	73.62	50.95	94.12
	70.56	66.75	179	131.56	65.15	68.85	58.79	66.44
	77.34	48.64	100.5	83.95	54.67	171.79	54.6	116.21
	57.85	83.62	125.44	77.77	63.84	87.11	80.6	84.89
	135.31	66.55	115.5	62.86	83.21	93.9	53.33	105.04
	55.23	43.95	126.65	134.82	98.2	62.3	41.32	85.07
	84.67	40.64	126.8	75.27	71.43	157.84	40.04	64.12
	70	90.92	162.2	107.17	102.36	67.9	52.66	82.21
	79.26	62.95	66	75.26	53.14	84.83	48.3	73.44
	52.35	63.23	89.29	88.69	92.07	93.2	41.57	81.95
	69.36	62.57	56.82	114.16	68.57	78.48	33.5	99.68
	81.82	49.44	52.03	86.55	83.73	161.31	52.39	120.26
	93.35	56.44	125	69.25	98.21	61.85	37.99	71.4
	105.62	87.48	86.13	126.18	138.65	105.44	113.23	70.64
	96.75	51.02	72.31	145.11	92.08	118.7	167.53	89.89
	57.34	40.54	50	165.01	90.2	88.68	161.18	145.46
	79.68	49.36	76.2	169.47	64.55	74.91	161.86	101.32
	69.56	55.78	51.03	82.49	61.78	95.38	198.58	97.92
	96.07	55.69	81.4	127.88	81.27	57.5	152.34	91.67
	114.25	37.54	70.33	78.78	61.27	62.02	181.25	75.6
	119.01	35.69	58.75	72.09	108.85	114.74	193.78	90.63
	61.59	32.64	105.72	87.67	117.2	114.37	168.17	77.59
	55.76	62.73	41.55	88.58	66.83	72.88	175.7	95.91
	66.74	34.94	73.63	92.08	73.84	89.75	221.77	82.27
	56.1	33.5	74.67	88.45	103.69	92.22	134.26	119.52
	68.25	47.88	45.18	104.57	99.66	95.81	195.74	89.87
	73.36	60.9	57.23	76.65	52.72	105.58	137.79	76.08
	75.38	40.03	71.16	101.48	76.06	102	181.16	67.8
	76.93	34.09	60.88	95.02	90.53	63.29	151.43	64.82
	33.6	61.05	48.91	72.33	58.94	113.15	112.32	109.61
	23.3	76.49	64.77	81.84	125.05	167.35	165.3	78.46
	38.57	48.5	93.95	74.88	73.63	80.54	133.2	71.44
	61.26	94.56	68.88	91.39	111.15	110.64	128.41	98.94
	40.94	38.74	70.92	89.37	83.06	92.91	183.61	103.27
	38.02	52.63	60	93.27	123.44	82.22	211.16	88.34
	33.52	49.08	76.71	74.98	70.25	77.73	157.31	75.57
	61.23	40.67	63.55	115.95	102.46	104.96	210.82	117.5
	40.93	41.09	58.88	95.52	83.41	31.87	216.03	63.46
	33.9	60.84	143.52	99.56	100.9	33.21	163.28	70.15
	34.21	44.07	93.12	74.69	92.52	31.74	145.71	129.86
	32.34	32.94	68.71	128.68	93.67	30.31	212.18	64.21
	33.78	47.65	72.5	87.94	59.98	41.81	205.46	64.48
	50.84	32.23	92	117.96	84.4	33.42	185.12	70.82
	28.69	48.9	88.66	72.63	65.27	83.16	120.23	68.25
	29.63	36.13	94.86	104.9	85.38	39.73	160.79	71.95
	51.45	30.9	112.97	114.17	60.47	63.48	199.79	122.8
	49.48	35.09	74.7	146.06	64.57	71.7	157.08	110.03
	27.73	33.88	136.23	109.79	104.85	29.27	134.32	88.69
	28.1	26.17	83.38	76.57	63.4	40.56	184.98	80.04
	42.59	28.7	80.52	72.18	141.63	46.87	183.72	56.1
	30.5	46.32	54.5	126.51	104.21	50.15	108.08	59.88
	25.39	27.15	79.15	68	57.13	56.47	187.17	93.14
	25.67	46.43	108.55	92.86	86.43	33.54	154.06	82.37
	38.18	35.24	134.59	68	72.23	38	137.47	66.21
	34.13	27.93	65.29	67	63.15	65.6	114.21	69.78
	25.88	30.73	111.39	73.45	113.75	36.64	125.79	69.65
	32.83	25.5	77.66	67.44	106.21	38	117.29	89.09
	47.96	32.56	60.61	104.94	95.51	41.84	130.27	105.96
	37.55	36.72	75.2	98.53	114.38	51.46	99.73	67.82
	46.36	28.67	67.77	73.57	93.56	32.4	104.5	130.49
	31	37.86	77.4	126.47	87.61	71.55	180.33	76.57
	52.43	25.79	90.06	87.93	108.53	34.13	160.62	82
	26.92	25.26	55.75	67.74	94.85	57.04	151.17	98.83
	24.93	26.26	96.6	72.42	60.8	39.8	156.59	90.5
	23.73	25.61	58.54	115.47	140.32	44.19	123.88	95.82
	35.85	37.05	78.85	92.92	97.03	36.6	121.35	89.85
	25.83	25.63	72.33	67.57	57.3	55.83	127.41	107.85
	39.19	33.99	103	134.88	112.02	54.72	118.88	72.1
	53.65	26.07	66.5	70.76	55.59	48.89	145.68	162.42
	26.66	26.68	54.64	79.17	94.65	42.97	105.4	106.92
	29.39	29.33	76.17	123.48	103.84	35.66	63.72	85.17
	45	35.26	77.6	87.87	91.56	46.43	101.49	99.75
	55.27	48.67	80.46	105.67	77.83	49.76	91.96	78.31
	26.67	54.09	97.52	110.05	70.58	60.31	92.13	76.13
	29.84	37.48	51.67	64.86	92.74	38.49	72.55	92.74
	30.39	49.02	59.94	77.74	70.88	41.46	132.8	83.73
	51.03	29.38	56.84	73.44	65.36	55.22	95.63	81.6
	59.44	31.46	77.75	141.93	86.39	37.47	145.92	104.01
	30.69	54.48	63.95	90.07	124.37	37.28	79.48	96.67
	36.08	49.27	84.13	69.6	101.87	37.73	107.59	147.1
	28.3	38.33	56.5	152.24	95.47	29.4	72.55	141.88
	37.45	35.74	109.55	62.17	114.65	29.21	82.91	81.13
	26	32.24	59.28	79.16	92.25	61.28	81.74	85.76
	106.56	57.98	63.94	74.24	108.67	65.3	70.4	99.16
	88	26.35	57.35	96.33	146.31	29.7	149.17	98.45
	81.47	22.9	150.77	129.2	106.56	39.31	77.03	104.42
	169.49	39.15	59.92	69.75	140.17	42.9	154.34	78.11
	95.16	30.18	93.78	77.97	95.55	66.98	136.65	111.67
	102.64	31.77	74.35	79.8	103.38	58.2	63.53	73.67
	136.86	34.3	67.3	67.09	129.88	35.84	78.23	121.59
	93.45	41.19	95	107.26	106.37	38.13	99.21	79.18
	148.3	27.1	82.29	70	107.37	35.53	96.55	79.88
	175.86	36.78	68.64	64.18	202.02	38.05	81.38	69
	145.48	25.09	158.78	103.32	145.84	50.82	70.27	65.2
	131.35	54	123.14	70.4	161.63	115.58	76	77.25
	163.56	40.4	73.64	64	100.36	71.2	133.25	39.33
	153.75	49.78	65.5	63	174.01	71.18	119.13	57.32
	86.94	29.05	149.86	64.45	127.05	72.38	95.83	58.61
	106	26.47	71.2	99.98	145.79	123.03	70.17	62.33
	77.19	39.12	86.63	92.51	176.65	121.29	94.67	63.32
	172.63	24.07	76.15	71.06	201.87	84.15	114.92	56
	157.67	39.6	66.83	74	111.1	98.32	88.49	50.84
	142.97	28.85	86.18	65.07	160.3	101.29	64.06	54.31
	139.2	26.2	64.52	43.62	94.55	91.19	80.45	57.11
	167.66	26.93	74.75	79.42	154.86	85.33	74.6	63.47
	100.81	42.25	133.68	34.7	122.33	73.26	30.17	45.47
	95	38.21	136.43	65.86	152.48	66.4	41.6	82.01
	88.05	39.43	80.74	43.2	139.92	78.87	39.68	48.45
	100.62	27	75.31	50.47	181.2	84.36	68.69	35.88
	86.95	44.61	58	71.19	124.35	102.61	82.96	45.46
	65	47.53	91.91	40.63	102.62	87.19	49.54	63.21
	72.48	37.89	60.6	45.47	105	141.45	44	69.9
	76.52	41.9	55.05	33.67	110.9	170.93	49.09	42.32
	71.32	53.24	103.65	34.09	192.64	152.66	64.55	47.03
	72.33	41.65	70.44	47.6	142.84	137.72	40.93	39.96
	74.55	39.67	74.56	36.42	140.57	171.82	39.79	45.67
	148.97	59.09	64.2	69.24	114.3	114.15	65.61	68.04
	70.5	64.93	57	68.71	178.81	90	35.52	39.84
	102.48	79.69	77.11	72	108.5	103.67	52.93	49.44
	107.55	37.62	78.01	86.11	177.74	153	53.55	41.44
	55.47	79.61	71.59	68.55	98.82	106.98	75.62	61.63
	55.36	41.3	56.57	34.67	196.28	83.1	34.13	62.77
	74.97	57.53	67.79	39.32	113	87.96	29.73	40.95
	69.43	47.7	62.44	37.32	144.38	109.85	38	69.33
	126.25	38.8	66.35	53.97	207.19	96.87	43	66.29
	110.18	65.89	108.14	35.39	190.57	86.2	46.38	63.68
	86.76	48.16	145.38	43.01	141.23	30.47	28.25	46.57
	60	33.33	99	34.35	172.28	33.8	32.33	41.53
	111.97	42.55	75.32	60.45	182.25	27.32	50.63	92.41
	58.5	66.67	150.47	68.75	163.57	24.92	35.74	70.02
	65.16	49.25	125.18	33.85	116	40.8	49.48	56.01
	139.24	44.93	106.86	55.06	120.5	53.95	65.66	43.33
	107.52	43.67	142.32	51.91	209.78	22.4	60.08	38.48
	97.07	40.1	120.38	33.15	217.95	30.32	71.45	60.71
	141.12	48.65	189.11	42.88	189.49	19.18	47.1	64.82
	110.95	34.9	137.23	31.64	210.34	44.56	27.86	59.34
	187.3	43.65	102.95	38.74	92.5	27.85	38.93	51.26
	186.62	39.28	90.06	73.48	200.75	24.19	40.12	66.41
	101.62	60.2	87.92	35.3	169.14	29	70.3	42.34
	159.05	49.32	112.4	31.9	159.72	29.34	54.94	48.82
	121.95	53.6	99.88	62.95	96.52	44.93	64.06	45.61
	106.41	45.45	113.38	34.75	175.04	27.42	41.81	34.1
	117.9	37.2	148.57	47.48	169.38	20.8	41.13	51.02
	135.15	47.2	189.17	45.39	209.67	24.45	61.71	47.14
	123.61	39.91	105.42	38.96	112.5	26.88	32.92	44.56
	104.92	40.59	131.77	38.68	105	20.7	35	79.9
	123.3	36.36	109.26	51.41	211.67	26.04	30.7	45.27
	162.1	57.04	129.07	47.45	134.28	30.44	43.88	37.7
	127.09	82	130.13	37.79	186.67	38.68	40.57	73.93
	104.92	54.59	83.1	73.98	150.42	21.78	31.9	86.07
	116.12	36.14	181.5	40.05	152.86	30.97	52.01	75.53
	146.96	36.91	101.63	90.07	125.07	33.19	32.43	109.77
	150.71	21.67	105	40.09	145	20.93	58.13	80.6
	209.37	26.38	121.63	39.77	163.02	41.76	45.72	84.71
	105.8	28.49	198.01	42.34	135.7	71.05	45.23	83.81
	163.19	26.16	106.73	37.79	189.19	52.72	30.6	81.24
	96.15	19.37	88.29	34.39	115.76	49.52	41.38	98.55
	191.13	41.47	148.81	57.95	120	71.75	50.59	85.89
	124.52	22.94	108.36	35.73	191.2	102.75	33.94	80.82
	109.89	32.58	152.87	35.1	169.14	53.76	38.19	121.15
	138.59	26.51	95.2	46.09	133.67	52	59.7	71.67
	104.91	23.38	105.52	48.57	171.4	67.73	51.32	103.03
	132.2	38.01	162.06	39.33	143.64	91.11	41.06	70.82
	102.71	28.25	141.72	51.69	167.91	68.41	34.62	103.15
	117.84	41.41	134.49	34.43	130.34	47.25	78.29	82.83
	126.65	20.59	102.7	53.72	116.4	66.6	60.45	72.73
	128.22	19.92	162.99	52.27	110.97	76.69	37.7	115.25
	100.18	21.47	97.19	35.53	104	83.83	28.29	90.59
	169.27	18.53	113.5	44.34	162.88	81.81	30.6	72.63
	168.43	39.75	101.39	34.43	193.81	49.5	78.53	108.98
	72.28	46.06	112.5	39.2	172.58	46.24	40.07	117.02
	60.1	25	144.32	37	147.58	104.6	46.85	72.55
	123.79	37.24	106.93	34.67	130.84	65.81	57.03	87.4
	65.59	24.09	169.63	35.17	202.22	90.55	31.29	78.9
	103.13	19.61	114.62	34.75	110.69	60.13	87.9	71.58
	80	19.67	154.68	57.67	123.93	71.28	133.18	98.12
	100.29	24.15	164.54	57.45	121.35	55.73	66.63	92.26
	132.97	21.44	142.57	34.83	142.76	76.45	103.2	80
	88.43	21	175.57	52.94	154.63	49.67	75.91	113.02
	121.59	32.1	109.5	65.07	116.3	79.03	133.72	76.62
	66.14	35.74	169.35	35.19	108.84	89.23	131.44	103.58
	89.74	25.46	125.98	42.81	154.17	68.95	165.47	84.02
	79.7	18.1	79.4	42.8	194.35	74	105	87.44
	82.9	20.45	91.71	33.35	114.26	99.42	80.64	75.21
	75.93	49.59	161.79	44.4	116.63	65.89	166.14	91.12
	121.13	38.08	87.24	52.53	102.4	78.32	77.73	73.26
	87.61	20.58	115.69	51.92	145.05	61.97	73.75	56.01
	98.76	67.87	152.85	33.77	109	97.48	127.17	43.33
	88.38	19.64	81.8	48.38	134.63	65.56	97.84	38.48
	61.21	19.61	109.41	84.12	174.28	110.35	86.05	60.71
	73.29	35.62	162.74	34.42	166.23	159	97.24	64.82
	85.96	20.53	85.27	81.2	133.51	84.07	135.48	59.34
	124.47	20.44	112.33	36.71	141.67	92.42	90.7	51.26
	82.09	29	119.96	35.53	123.05	72.14	135.05	66.41
	80.06	19.67	101.8	34	158.72	104.32	135.76
	83.97	23.56	108.25	35.55	120.17	87.81	122.63
	83.12	39.1	116.87	40.19	179.34	79.43	86
	104.38	45.77	89	34.52	83.09	83.55	173.9
	82.82	30.06	139.25	74.98	121.69	141.26	129.18
	117	39.64	142	54.85	108.64	57.25	92.26
	99.18	27.62	106.54	56.16	112.57	98.5	90.19
	102.68	20.75	115.51	43.02	131.14	96.72	71.42
	125.96	36.35	120.33	53.63	125.26	111.06	81.4
	78	48.56	220.08	55.21	139	73.52	123.11
	105.12	19.56	109	59.26	152	64.33	138.89
	135.02	21.72	80.15	51.44	181.83	70.46	91.75
	123.63	25.01	91.71	39.14	89.69	69.07	123.11
	151.65	28.44	187.81	37.66	156.03	70.4	137.06
	118.39	20.05	92.6	78.99	92.75	70	120.17
	154.17	21.88	107.76	34.29	116.13	52.83	78.19
	143.31	19.67	103.59	46.11	180.67	63.62	80.25
	122.89	22.24	83.6	45.5	106.86	86.71	103.49
	88.26	31.13	87.64	55.05	101.5	62.24	103.42
	92.09	23.19	104.63	41.35	139.5	75	82.59
	92.89	35.16	119.16	45.72	164.15	55.1	88.79
	134.21	32.29	93.42	63.26	173.09	92.47	79.46
	110.29	30.84	113.69	36.52	185.58	67.65	92.78
	122.78	21.2	89.29	52.23	98.17	95.26	73.82
	151.4	20.59	98.15	42.05	94.03	55.72	91.58
	99.79	35.55	96	41.47	99.88	85.7	138.34
	122.75	22.38	149.88	33.6	158.35	62.73	82.04
	178.6	38.69	74.9	32.29	171.03	82.79	93.72
	137.26	46.88	125.75	55.44	95	88.76	123.18
	90.94	30.45	96.4	62.42	128.25	72.74	71.16
	118.55	33.22	123	58.86	104.34	58.29	94.09
	126.68	35.29	75.95	47.26	95.93	83.24	115.1
	96.22	28.39	107.42	32.44	139.37	107.85	78.85
	128.82	20.44	96.59	51.87	169.1		48.11
	158.87	21.89	124.05	36.67	128.05		129.6
	168.96	43.25	84.62	42.42	112.5		98.97
	117.13	25.67	107.47	32.33	103.18		137.87
	77.14	33.54	103.55	55.75	93.5		95.39
	128.51	21	92.53		98.06		62.83
	175.77	38.8	90		84.75		63.48
	131.16	22.61	137		86.7		81.74
	146.45	22.07	92.41		89.72		52.83
	137.26	26.92	98.36		140.78		95.39
	89.73	20.07	70.58		98.08		73.29
	107.29	35.42	129.74		109.1		91.02
	100.76	30.23	123.71		113.95		66.5
	103.95	25.24	124.44		87.5		105.82
	78.9	20.3	134.46		182.62		65.25
	97.76	18.56	120.27		169.08		64
	97.25	20	108		113.14		120.3
	70.53	28.07	77.78		149.48		92.22
	90.3	34.57	152.73		158.48		70.01
	72.94	35.18	86.91		150.75		72.18
	81.05	34.54	115.48		93.83		61.65
	89.43	33.37	73.83		107.97		78.1
	64.02	27.66	107.79		105.19		90.16
	105.72	26.19	96.29		152.82		66.26
	69.38	24.2	119.47		184.6		91.61
	70.73	30.43	155.01		190.35		92.56
	79.02	20.08	99.56		102.33		54.23
	71.73	19.5	118.77		122.98		69.67
	48.25	22.59	51.25		106.82		100.37
	45.79	22.91	50.65		102.2		61.73
	86.31	19.68	44.12		91		79.6
	49.71	21.52	54.76		88.31		135.02
	88.96	25.1	43.23		149		123.66
	68.85	21.25	69.92		104.87		134.1
	74.4	22.16	43.78		116.78		81.55
	78.81	22.08	42.42		156.44		129.61
	50.05	24.28	46		87.14		62.43
	74.3	19.28	72.01		77.1		132.53
	69.12	20.57	46.8		162.36		62.69
	67.7	46.24	68.9		98.54		85.48
	51.93	20.88	60.13		150.7		48.64
	80.3	22.8	41.33		135.31		62
	63.77	27.87	34.92		140.7		199.58
	69.87	22.16	65.54		111.22		126.5
	94.16	19.05	46.07		80.21		174.78
	52.79	20.87	49.08		142.78		185.06
	121.07	20.71	39.73		173.37		180.7
	112.06	20.44	40.54		112.73		154.77
	189.41	22.31	53.72		91.41		181.05
	164.36	19.79	37.71		161.36		128.65
	111.08	21.56	41.25		111.36		186.51
	180.94	25.1	77.45		96.25		129.03
	144.7	21.32	41.45		118.24		122.58
	185.43	20.46	43.06		119.21		110.13
	187.79	20.92	115.34		101.72		196.61
	193.07	25.19	47.41		145.35		110.95
	119.29	25.93	38.25		168.88		179.36
	134.82	19.73	44.46		183.65		164.17
	99.61	22.82	73.3		78		158.09
	164.1	39.59	84.61		93.38		104
	139.03	20.08	77.2		94		122.28
	182.02	23.63	80.78		97.53		163.27
	170.38	31.93	46.42		160.49		172.22
	131.54	18.36	39.2		80.08		179.24
	140.16	24.98	41.56		133.76		142.31
	97.38	51.87	41.39		86.09		93.42
	174	19.22	43.43		118.64		179.13
	144.83	27.67	46.84		161.4		128.91
	135.84	21	37.67		102.21		184.35
	110.79	22.99	44.75		164.96		44.25
	173.64	31.22	95.1		99.03		54.65
	93.1	53.57	57.13		94.97		54.21
	89.13	28.93	42.5		155.38		71.22
	180.6	32.71	49.3		77.17		63.5
	185.79	41.46	66.74		163.98		58.73
	208.11	19.45	61.5		74.67		52.13
	162.26	33.18	35		147.07		75.86
	128.2	19.4	102.93		86.44		45.88
	184.24	18.94	47.82		126.97		61.69
	107.27	21	47.13		125.24		50.87
	146.25	28.06	92.5		98.32		49.88
	91.78	20.45	52.84		147.11		56.61
	182.77	19.55	37.83		102.04		50.08
	176.36	24.7	67.95		97.07		59
	130.45	23.18	53.36		110.65		83.52
	188.69	51.56	60.25		174.03		59.06
	97.55	32.43	122.12		82		66.4
	176.9	47.47	110.55		150.5		110.1
	196.81	43.44	56.76		155.66		63.6
	177.09	24.07	81.37		135.67		85.83
	166.36	29.51	59.8		138.14		90.52
	98.58	20.43	77.39		83.79		94.21
	184.06	21.23	77.22		98.84		113.65
	119.56	35.94	57.75		106.75		47.31
	144.36	23.08	70.94		100.8		61.1
	171.99	21.56	81.45		115.54		100.64
	96.87	20.89	71.66		86.91		54.77
	138.64	19.29	55.67		129.38		46.24
	132.63	18.76	136.1		105.38		88.22
	122.25	21	76.21		96		55.06
	189.09	39.97	94.58		97.83		127.98
	164.9	26.39	54.04		124.6		58.17
	133.16	18.71	92.02		173.1		53.13
	143.34		53.64		114.89		59.39
	129.73		60		170.26		117.52
	89.6		65.36		182.96		91.45
	143.95		55.69		89.81		44.46
	137		129.3		94.5		82.33
	149		80.69		92.43		113.37
	165.1		88.69		137.89		84.53
	147.35		75.83		87.89		75.04
	125		82.42		101.88		79.38
	113.36		70.18		108.07		67.47
	141.18		57.36		156.25		77.54
	133.8		49.77		135.13		115.11
	178.87		59.48		99.36		144.27
	131.38		66		157.54		132.42
	120.55		64.53		191.34		94.92
	161.41		70.87		116.72		149.73
	157.29				110.62		145.08
	162.35				173.91		159.23
					155.4		140.42
					184.16		168.16
					107.32		176.26
					172.8		181.09
					99.78		197.56
					106.71		121.38
					99.73		161.07
					115.64		124.79
					152.83		163.12
					115.17		121.47
					87.92		96.5
					114.91		165.58
					166.25		90.5
					180.88		106.64
					168.24		143.13
					92.97		185.57
					138.23		117.18
					116.28		206.22
					134.24		109.81
					156.74		103.58
					196.3		174.17
					135.87		132.36
					147.03		94.33
					157.33		129.92
					96		82.92
					92		123.71
					140.24		82.75
					120.85
					171.38
					147.43
					209.32
					131.13
					139.95
					146.52
					139.19
					213.42
					194.03
					213.13
					153.38
					215.14
					191.43
					219.31
					202.75
					194.86
					145.68
					160.4
					163.32
					194.58
					141.44
					165.55
					140.78
					211.48
					190.19
					133.49
					158.97
					152.9
					224.35
					177.47
					183.19
					181.75
					171.03
					180.07
					140
					123.18
					216.39
					131.65
					111.85
					191.59
					209.79
					107.38
					111.54
					176.09
					145.5
					164.76
					157.29
					199.07
					120.86
					195.86
					128.43
					187.26
					117.64
					206.95
					201.98
					188.43
					146.91
					164.21
					166.79
					209.55
					177.71
					138.21
					161.96
					213.39
					187.81
					181.1
					135.33
					181.29
					166
					124.45
					121.4
					141.75
					167.41
					183.07
					148.25
					139.09
					159
					157.7
					123.1
					143.94
					166.95
					139.2
					163.35
					164.66
					166.31
					170.92
					170.28
					174.04
					108.79
					163.18
					169.02
					175.52
					149.34
					172.15
					139.91
					183.53
					186.45
					131.33
					157.47
					97.6
					103.76
					201.5
					148.45
					176.85
					195.62
					140.76
					192.61
					192.81
					201.94
					176.35
					171.21
					200.64
					112.6
					182.82
					201.17
					211.72
					185.36
					129.56
					114.77
					199
					160.08
					186.73
					105.71
					198.27
					100.69
					111.12
					140.13
					199.57
					134.76
					178.24
					114.64
					186.09
					204.31
					127.6
					190.43
					127.71
					174.66
					147.44
					203.69
					126.27
					195.75
					193.21
					189.88
					170.27
					134.39
					179.17
					131.66
					115.14
					127.71
					153.39
					170.33
					186.06
					131.04
					159.42
					191.7
					143.18
					125.32
					198.61
					134.47
					144.59
					136.3
					170.25
					97.81
					82.32
					60.93
					102.68
					85.86
					153.67
					65.07
					81.79
					104.32
					65.89
					84.78
					101.02
					114.52
					67.66
					70.22
					71.6
					95.16
					110.2
					64.14
					71.48
					101.48
					64.13
					105.35
					62.91
					143.81
					119.03
					80.49
					131.26
					85.51
					57.12
					90.74
					114.77
					103.93
					60.15
					88.39
					92.47
					78.33
					76.71
					79.76
					109.85
					93.33
					60.71
					72.13
					81.24
					92.35
					63.32
					76.02
					89.67
					65.31
					109.07
					109.22
					59.3
					85.14
					83.36
					123.85
					83.5
					54
					71.11
					110.21
					87.84
					63.89
					77.67
					164.6
					107.22
					97.24
					131.22
					103.09
					97.82
					78.5
					69
					88.12
					64.95
					77.1
					109.43
					63.5
					96.67
					90.87
					92.83
					91.25
					135.88
					92.2
					91.46
					93.14
					138.86
					107.5
					83.1
					152.59
					94.33
					114.98
					138.67
					116.02
					69.69
					81.4
					133.09
					158.87
					143.6
					82.16
					108.55
					164.52
					108.22
					90.25
					81.21
					149.06
					119.71
					75.46
					74.09
					69.88
					93.7
					146.99
					105.41
					129.29
					79.24
					97.32
					186.73
					134.28
					127.89
					73.45
					82
					86.57
					91.3
					79.66
					145.68
					98.75
					82.6
					123.8
					116.48
					153.57
					107.69
					75.1
					136.14
					89.75
					134.44
					109.82
					100.92
					85.7
					116.09
					79.34
					77.93
					74.5
					164.36
					96.39
					91.97
					108.1
					74.57
					153.14
					101.22
					88.64
					136.73
					190.12
					87.29
					83.64
					88.44
					151.76
					106.16
					143.19
					90.78
					98.46
					118.64
					119.34
					91.49
					174.18
					73.42
					119.33
					75.94
					79.07
					183.35
					149.95
					81.16
					131.67
					88.6
					124.59
					93.69
					98.93
					91.51
					113.89
					74.31
					69.05
					73.1
					89.48
					160.21
					138.23
					85.9
					82.33
					86.54
					76.73
					87.43
					76.7
					71.73

## Sheet: Figure 6L-LSG-LTR
			Relative intensity of LSG/LTR in the intestine
			WT	daf-2(e1370)	daf-16(mu86)	daf-16;daf-2	skn-1(zj15)	daf-2;skn-1	daf-16;skn-1	daf-16;daf-2;skn-1
			0.895759	1.86667	1.38507	0.671201	0.212158	0.97786	1.64385	0.437604
			1.01549	2.19063	1.25748	0.626146	0.381755	0.825886	2.0356	0.344446
			1.06186	2.45717	1.50667	0.698026	0.327219	0.779888	1.86975	0.335074
			0.979955	2.36858	1.48022	0.709364	0.340935	0.746811	2.6988	0.403473
			1.02292	2.01157	1.97368	0.591749	0.476647	0.947447	2.46491	0.302135
			0.789163	2.10843	1.48513	0.604028	0.588983	0.713788	2.67985	0.268375
			0.953389	2.27658	1.54887	0.630889	0.531452	1.00856	2.30039	0.339137
			1.02315	2.53172	1.64268	0.679556	0.5117	0.331473	2.02817	0.375029
			0.754147	2.20988	1.98811	0.625895	0.397947	1.04692	2.45207	0.381998	The numerical data are analyzed by GraphPad Prism 6 and represented as a bar graph in Figure 6L.
			0.838722	2.23882	1.56525	0.592228	0.520146	1.54909	2.28005	0.252128
			0.874565	2.02662	1.53471	0.612821	0.427692	1.73465	1.64274	0.300044
			0.845883	2.48942	1.41061	0.619086	0.623623	1.74864	1.90394	0.30823
			0.830962	1.8636	1.66809	0.595985	0.643564	1.90378	2.2897	0.358261
			0.81614	2.3954	2.36711	0.617208	0.544896	1.50025	1.87121	0.360629
			0.847279	1.99543	1.61356	0.573406	0.435596	2.02559	2.29142	0.271763
			1.04799	2.41439	1.9691	0.510323	0.608969	1.49122	2.13986	0.323591
			1.08228	2.86557	1.52766	0.508918	0.57082	1.1244	2.31793	0.29007
			1.04743	2.87932	1.52902	0.595487	0.570999	1.64703	2.15416	0.4081
			0.964954	1.81951	1.64313	0.525483	0.474454	1.3314	2.57595	0.350337
			0.83711	2.30041	1.39373	0.593504	0.638119	2.17886	2.45067	0.278875
			1.04015	2.76674	1.44813	0.633179	0.301445	1.64725	1.78062	0.22505
			0.795553	2.45462	1.75931	0.504087	0.710316	1.6191	2.01979	0.278674
			0.882869	2.25112	1.54366	0.526289	0.618717	2.05514	2.1599	0.224079
			0.76536	2.41478	1.48438	0.667354	0.637968	1.7463	2.3708	0.236866
			0.88444	2.80382	1.60808	0.561695	0.668235	2.04492	2.38234	0.283544
			0.678876	2.67107	1.63719	0.611267	0.517649	1.75392	2.27625	0.253794
			0.789764	2.91149	1.157	0.617002	0.543172	1.6907	2.38879	0.326279
			1.09676	3.123	1.76299	0.673715	0.657252	1.28736	1.59896	0.216013
			0.930351	3.51348	1.86888	0.702261	0.621986	1.41438	2.39632	0.348884
			0.656241	2.49476	1.94973	0.732194	0.51922	1.98504	2.03855	0.356106
			0.748179	3.28881	1.52898	0.888583	0.618433	1.89012	2.43974	0.20664
			1.05187	2.50561	1.17668	0.947437	0.665243	1.84158	2.77314	0.317691
			0.766877	2.97626	1.34469	1.0054	0.592717	2.01361	1.88315	0.316851
			0.80379	3.22922	1.2893	0.752747	0.603038	2.0444	2.11026	0.252279
			1.26138	3.00778	1.99794	0.836186	0.65162	1.94642	2.17644	0.365779
			0.932682	3.26556	1.82834	0.962388	0.722096	1.65755	1.84497	0.242457
			0.766139	3.42485	1.63459	0.869599	0.74203	1.74867	1.82695	0.244531
			0.916345	2.80489	1.89952	0.716345	0.783214	1.62575	2.10342	0.220579
			0.96427	3.37853	2.13252	0.743146	0.68319	1.96778	1.8657	0.176021
			0.847062	3.86674	1.96887	0.674038	0.412266	1.5963	2.47627	0.26332
			0.748478	3.65884	1.95519	0.830407	0.649954	1.95968	2.05091	0.217194
			0.756728	2.93357	2.4143	0.716884	0.826632	0.5	2.24746	0.808819
			0.662997	3.23043	1.76094	0.955294	0.784197	2.29317	2.02164	0.674311
			0.686554	3.24477	2.38442	0.773232	0.925316	2.27301	1.9153	0.900715
			0.648755	3.58316	1.6926	0.741721	1.04825	2.46104	2.14102	1.1159
			0.901619	3.70983	1.78955	0.777137	1.28571	2.48383	2.2163	0.831081
			0.677811	2.92154	1.93692	0.680408	1.13005	1.80396	2.42574	0.94155
			0.647829	3.45038	1.73734	0.822175	0.986588	3.13529	1.88936	0.975687
			0.839485	3.47377	1.53511	0.895454	0.614377	2.39271	1.89659	0.897796
			0.7111	3.55383	1.70294	0.774848	0.787444	2.34033	2.6104	0.984079
			0.635057	3.47516	2.34962	0.729112	0.66589	2.21093	1.97823	0.849829
			0.715229	3.04931	1.38026	0.675641	1.20641	2.74923	2.32991	0.780715
			0.679781	3.76474	1.93875	0.653173	0.846947	2.44734	2.04562	1.01028
			0.632445	3.72927	1.76683	0.738196	0.701708	2.47981	1.82404	1.02443
			0.816494	3.56574	2.14877	0.752972	0.99905	2.41115	1.83871	0.97301
			0.596784	3.01681	1.51242	0.785236	0.621376	1.94802	2.51173	0.980488
			0.697591	3.21671	2.33604	0.92995	0.573565	2.32628	1.53118	0.900267
			0.705398	3.36287	1.83062	0.739269	0.593736	1.97152	1.92325	0.715593
			0.86746	2.92646	2.21657	0.768311	0.648762	2.71712	2.25911	1.13558
			0.799496	2.24011	1.94712	0.822587	0.70428	3.12206	2.094	0.758272
			0.827501	3.24807	2.23619	0.864857	0.957283	2.74314	2.35073	0.920475
			0.655996	3.58605	1.99855	0.730889	0.591835	2.28171	2.17675	0.853702
			0.730292	3.42463	2.13486	0.978711	0.667411	1.96008	2.10588	0.687322
			0.819414	3.12739	1.91859	0.867568	0.809914	2.41767	1.52411	0.778949
			0.698826	3.91636	1.67378	1.18039	0.829845	2.06082	2.09469	0.827299
			0.85425	3.5833	1.81591	0.830724	0.652426	2.14471	1.81669	0.704609
			0.773387	3.50445	1.95357	0.812753	0.526046	2.08133	2.25317	0.693058
			0.830599	3.41303	2.0442	0.758905	0.739961	2.07752	2.009	0.781861
			0.72275	3.71033	1.5922	0.869069	0.581395	2.35459	1.75751	0.751309
			0.636269	3.38103	1.7157	0.938657	0.471152	1.92098	2.11285	0.703665
			0.792746	3.68488	1.88837	0.888125	0.581204	2.18683	1.70241	0.832658
			0.66497	3.41055	2.04124	0.749419	0.547608	2.25137	1.70241	0.763173
			0.959639	2.7939	2.04035	0.903463	0.474924	2.1432	1.58671	1.09108
			0.805061	3.43726	2.28578	0.880738	0.723275	1.76124	1.80272	0.679262
			0.772825	2.96662	1.37504	0.775903	0.607666	2.51297	1.62465	0.878736
			0.714179	3.64332	1.24059	0.836056	0.523012	1.48436	1.86529	0.876492
			0.848433	2.98785	2.03609	0.785638	0.6408	1.89736	1.9709	0.798041
			0.667818	3.48069	1.87325	0.863681	0.678261	1.60041	1.74772	0.755418
			0.770304	3.35702	1.77236	0.807143	0.407821	2.30634	1.84552	0.710988
			0.886115	3.63401	1.67245	0.940026	0.599026	1.58215	1.93136	0.584605
			0.78396	3.38509	1.67556	0.740741	0.802581	2.11043	2.1227	0.577534
			0.658693	3.15391	2.17169	0.761632	0.617276	2.27621	1.78711	0.377435
			0.845233	3.28823	2.02642	0.789213	0.853224	1.66972	1.9174	0.339392
			0.743646	3.54435	1.74636	0.872872	0.503112	1.86113	1.93392	0.462067
			0.725743	3.27703	2.54072	1.08773	0.487222	1.60294	1.74987	0.374239
			0.83322	2.31375	1.76001	1.07587	0.645989	1.67554	1.67834	0.3616
			0.696569	3.31082	1.68445	1.04799	0.487255	1.56858	2.132	0.317766
			0.81023	2.65308	1.66701	1.01986	0.457467	1.27068	2.0964	0.372538
			0.631987	2.88977	1.75274	1.12731	0.668626	1.29549	1.97724	0.371078
			0.954448	3.90609	2.12453	0.92216	0.539389	1.4628	2.28846	0.419924
			0.984937	2.60175	1.9379	0.736211	0.6	1.83302	1.83819	0.367628
			0.82856	1.78261	1.88596	0.834899	0.47277	1.9594	1.98605	0.342392
			0.997818	2.6489	1.32713	1.1149	0.481863	1.66282	2.0065	0.432037
			0.706446	4.0162	1.0536	0.73272	0.591297	2.11564	1.64229	0.377043
			0.966337	3.04916	1.04212	0.932584	0.5	2.12	1.84452	0.438233
			0.746608	2.91294	1.17408	0.848866	0.471289	1.87212	1.99076	0.349853
			0.827396	2.33739	1.13734	0.97913	0.482034	1.85333	1.99057	0.381074
			1.11241	3.0545	1.07421	1.08556	0.536053	1.53537	1.75462	0.3644
			0.822007	2.4281	1.06557	0.72067	0.447742	1.91835	1.7094	0.358498
			0.808422	2.96893	1.29425	1.04642	0.565527	2.07398	2.13694	0.431316
			0.816593	2.92593	0.915716	0.9725	0.495562	2.01386	1.93013	0.386598
			0.880003	2.62263	1.15093	0.978495	0.770753	2.2231	2.07414	0.338651
			0.769745	2.01494	0.994522	0.891369	0.50551	1.53159	2.29416	0.354495
			0.892969	2.6	1.1156	0.83583	0.609203	2.25318	1.74362	0.383946
			0.896681	3.07748	0.977151	0.752729	0.540128	1.67077	1.97541	0.247652
			0.510152	2.50954	0.828155	0.978421	0.735188	1.98317	1.84611	0.311619
			0.286381	3.35391	1.31159	0.923485	0.600342	1.7971	2.0794	0.393952
			0.34315	2.96075	1.25873	1.0547	0.506439	1.77706	2.10828	0.328084
			0.236446	2.61426	1.16257	1.08667	0.639204	1.68689	1.71221	0.307685
			0.765469	2.51688	1.49345	1.44523	1.08384	1.61664	2.04979	0.326446
			0.777177	2.21229	1.30394	0.843222	1.33036	1.41703	1.51071	0.354935
			0.871014	2.46651	1.37479	0.830902	1.05475	2.18937	1.36965	0.377056
			0.7638	2.66073	0.895109	0.844626	1.10069	2.25586	1.67321	0.349652
			0.421046	3.27737	1.3245	0.948515	1.11071	1.76901	1.71043	0.313922
			0.274686	1.85956	1.51116	0.953751	0.757881	2.21505	1.67155	0.344044
			0.738769	2.58585	1.06702	0.881129	0.614725	2.1746	1.67263	0.351717
			0.681871	2.05819	1.0029	1.09222	0.590323	2.914	1.65977	0.400857
			0.734183	2.41429	1.13114	0.774077	0.687056	1.85714	1.67846	0.332909
			0.613185	1.9009	1.24828	0.843424	0.778133	2.26495	1.71076	0.451968
			0.739963	2.46672	1.26303	0.830423	0.72144	2.58794	1.67202	0.313065
			0.502692	2.88072	0.991843	0.9099	0.631724	2.0884	2.02773	0.326804
			0.750598	2.25081	1.22988	0.803629	0.534697	1.91337	2.01699	0.350657
			0.772448	3.2162	1.42861	1.04859	1.05255	2.27694	2.26512	0.324968
			0.372719	2.2751	1.52954	0.885393	0.704638	1.63408	1.87285	0.383653
			0.732736	2.42429	1.36414	0.96822	0.703357	1.3797	1.1329	0.259145
			0.660129	2.44465	1.50043	0.74711	0.701574	1.28221	1.86448	0.286691
			0.719196	2.76039	1.0702	0.992628	1.04034	1.11264	1.02199	0.528379
			0.619012	3.22612	1.48809	0.686133	0.746393	1.44639	1.45785	0.256013
			0.79062	2.37192	1.77663	0.670904	0.903424	1.34265	1.93819	0.434268
			0.632044	2.83356	1.45566	0.802073	0.739811	1.61835	1.32145	0.288472
			0.767927	2.46163	1.29739	0.952028	0.819884	1.56366	1.03767	0.511666
			0.68308	2.50338	1.55222	0.793572	0.594065	1.391	1.33681	0.450199
			0.903203	2.53414	0.71701	0.875	0.826323	1.4412	1.62122	0.509571
			0.651541	2.83894	0.81985	0.789986	0.873478	1.239	1.11651	0.60589
			0.57387	2.30881	0.913025	0.707469	0.608152	1.16696	1.4866	0.276044
			0.570998	2.27363	1.25932	1.07197	0.926388	1.38596	1.69042	0.292123
			0.565255	2.13112	0.878697	0.743387	0.653141	1.27079	1.52497	0.432738
			0.641055	3.1173	0.981426	1	0.787734	1.17318	1.22082	0.628105
			0.787825	2.19659	0.806464	0.914424	0.66923	1.33283	1.72132	0.59161
			0.762152	3.02698	0.846967	0.980052	0.893252	1.41326	1.39009	0.519642
			0.573125	2.66772	0.809297	0.827816	0.55424	1.33776	1.50414	0.544106
			0.652298	3.28007	0.806753	0.882718	0.502467	1.56061	1.65745	0.517593
			0.61315	3.02147	1.30627	0.758847	0.473479	1.36395	1.36397	0.489485
			0.716051	2.26688	1.17698	0.940007	0.573935	1.42296	1.63231	0.452547
			0.691393	2.60792	0.814448	0.742135	0.693461	1.2428	0.461618	0.41226
			0.646248	1.92235	0.912635	0.846473	0.512255	1.581	1.37012	0.4645
			0.581061	2.75984	1.01085	0.880641	0.965651	1.1236	1.43854	0.637167
			0.717982	3.16746	1.00638	0.651163	0.458128	1.49352	1.521	0.575266
			0.686748	2.24981	0.779182	0.81273	0.845791	1.48073	1.2215	0.448445
			1.67018	2.30528	1.06578	0.874027	0.525813	1.27336	1.47912	0.4616
			1.66453	2.88496	0.947066	0.92942	0.565485	1.48661	1.23318	0.506819
			1.7205	3.68933	0.856799	0.723725	0.67102	1.36993	0.348421	0.510756
			1.89332	2.10861	0.774495	0.708305	0.511998	1.32654	0.385554	0.51695
			1.57173	3.93953	0.941912	0.851985	0.491234	1.63796	1.87761	0.602116
			1.5152	2.05712	1.26494	0.848217	0.513626	1.38344	1.21139	0.514366
			1.60222	2.27717	1.03188	1.52956	0.487987	1.43785	1.48548	0.616193
			1.60252	1.44434	0.863941	1.60431	0.758324	1.32447	0.328512	0.483559
			1.31103	3.84476	0.716304	1.20783	0.543034	1.35583	1.71596	0.502857
			1.2224	1.32323	1.22145	1.29112	0.493196	1.41992	0.408998	0.530927
			1.33322	2.69245	0.684238	1.66406	0.51818	1.94188	0.080354	0.485741
			1.82993	2.18737	1.14264	1.39818	0.426692	2.43878	1.11529	0.412413
			1.47821	2.34775	0.829158	1.14918	0.7139	2.2947	0.917505	0.446411
			1.94333	3.18592	0.961266	1.77478	0.750792	2.18242	1.32745	0.506305
			1.5457	1.70364	0.941319	1.47256	0.417247	2.29855	1.48099	0.586979
			2.0058	2.49881	0.633255	1.40592	0.771328	2.52454	1.48566	0.412556
			1.83233	2.45229	0.88054	1.47033	0.621119	3.24971	1.428	0.531639
			1.67293	1.81406	0.956681	1.76628	0.735799	3.22471	1.46346	0.641081
			2.26562	2.25261	0.902613	1.26479	0.491235	2.94712	1.57832	0.521999
			1.7937	2.37199	0.942641	1.16848	0.520271	2.84152	1.33749	0.556849
			1.66325	3.77063	0.901668	1.29248	0.487888	2.2206	1.30583	0.433376
			1.97489	2.37049	1.06217	1.31628	0.576908	2.39953	1.78654	0.606718
			1.77065	2.23098	0.982343	1.60199	0.570069	2.94423	1.4438	0.479904
			1.39128	2.42177	0.466097	1.57336	0.671687	2.99066	0.879007	0.466222
			1.62454	2.33945	1.163	1.41507	0.439114	2.93168	1.93116	0.455386
			1.54665	2.10356	1.03492	1.55893	0.633584	2.91405	1.5365	0.586538
			2.85811	2.34428	1.11927	1.26009	0.680206	2.17653	1.23543	0.542037
			1.49725	2.24433	1.07696	1.5968	0.529583	2.25025	1.55309	0.589477
			1.40135	2.98683	1.07895	1.52182	0.478064	2.48188	1.81554	0.457313
			1.71183	4.70299	1.13433	1.42736	0.796267	2.5269	2.03969	0.615566
			1.81818	3.68638	1.3659	1.44991	0.575253	2.54851	1.97229	0.470734
			1.63671	5.43989	1.26995	1.12613	0.598943	2.39217	1.44013	0.597546
			1.94704	4.1777	1.68377	1.29519	0.685058	2.40107	1.80165	0.472881
			1.75163	6.47469	1.58286	1.40546	0.66662	2.04295	2.08754	0.50242
			1.78409	4.83991	1.36197	1.51239	0.67787	1.89797	1.20966	0.50781
			1.72643	3.97445	1.22591	1.41708	0.482967	1.79812	1.54726	0.519523
			1.63997	4.19807	1.07157	1.30027	0.634797	1.96254	1.95316	0.523821
			2.01577	3.98108	1.18668	1.63429	0.742957	2.08573	1.64809	0.504557
			1.88071	4.47802	1.26921	1.25201	0.668117	1.94695	1.92778	0.602733
			1.51318	4.70114	1.48798	1.22822	0.473356	2.07318	1.12	0.494949
			2.91633	5.23139	1.28227	1.6604	0.550895	1.806	1.21098	0.478448
			1.56349	4.77685	1.2572	1.36782	0.631754	2.04006	1.4933	0.498999
			1.64209	4.07071	1.54613	0.907885	1.32502	1.93676	0.817836	0.578075
			1.81587	3.63114	1.19209	0.862487	1.35198	1.84293	0.964206	0.553782
			1.72619	3.4425	1.52342	0.733723	1.19486	1.70769	0.922721	0.505141
			2.33586	4.80708	1.48562	0.862081	1.14817	2.67741	0.993333	0.651814
			1.97435	5.55841	1.36261	0.630023	1.31136	1.91919	1.16442	0.490932
			1.99456	4.32536	1.72232	0.626177	1.30107	1.85042	0.92943	0.418695
			1.88492	4.10158	1.35879	0.715014	0.922806	1.85042	0.953867	0.566425
			1.50957	3.92707	1.14493	0.582779	1.13392	0.26276	0.953448	0.432218
			1.9481	5.20594	1.26096	0.561744	1.15538	0.377103	0.773828	0.564455
			1.54002	3.39468	1.16851	0.500166	0.890758	0.226971	0.851008	0.572955
			1.58278	4.59404	1.24664	0.694649	1.0376	0.314827	1.2388	0.445152
			1.70372	5.41508	1.26987	0.569353	1.03481	0.287113	0.953054	0.426929
			1.43667	4.88124	1.29787	0.636525	1.02695	0.237774	0.947925	0.624948
			1.50307	4.20531	1.13877	0.510487	1.17894	0.297424	0.911921	0.501389
			1.65352	3.39359	1.38038	0.609781	0.991267	0.24395	1.06181	0.497564
			1.73723	3.51397	1.22684	0.530985	0.950533	0.261003	0.836187	0.425786
			1.42708	4.4876	1.35857	0.788618	1.03462	0.230363	0.940134	0.561881
			1.29344	3.97605	1.91401	0.589233	1.01062	0.254867	0.846857	0.505062
			2.05892	0.612195	1.35884	0.615075	1.0662	0.234577	0.887919	0.510103
			1.71047	0.552017	1.28344	0.730328	1.05936	0.248667	0.954649	0.538567
			1.56894	1.89103	1.18149	0.597068	0.978295	0.321978	0.738308	0.520556
			1.55605	1.41898	1.21732	0.615742	1.16828	0.283048	1.17167	0.522075
			1.9732	1.89822	1.35667	0.515687	1.14936	0.269941	1.19735	0.55546
			1.44269	2.16225	1.26521	0.535576	0.973051	0.236112	0.936985	0.635173
			1.33466	1.70908	1.63512	0.503381	1.03041	0.317853	0.944148	0.547622
			1.20713	1.26286	1.71075	0.611111	0.871177	0.263813	1.03088	0.55133
			1.54173	1.6305	1.36818	0.427665	1.15481	0.246846	0.991563	0.456771
			1.65318	1.28906	1.31373	0.499773	1.25877	0.217506	1.03873	0.488875
			1.98077	1.24353	1.39705	0.383648	1.02789	0.264149	1.1063	0.60778
			1.47142	1.38486	1.20662	0.789149	1.2532	0.296409	1.11893	0.445382
			1.93383	1.33803	1.32742	0.871309	0.993917	0.290498	0.384925	0.444224
			1.65031	1.44532	1.44067	0.472421	1.11627	0.255786	0.323032	0.508515
			0.736982	1.35759	1.66599	0.521896	1.34411	0.292324	0.359175	0.492559
			1.3611	1.23958	1.24957	0.674355	1.52041	0.26295	0.369939	0.484658
			1.86936	1.4193	1.34463	0.41025	1.08499	0.32604	0.875322	0.54453
			1.85244	1.1275	1.36299	0.538673	1.0096	0.386228	0.433526	0.452087
			1.78069	1.11399	1.49977	0.531688	0.90748	0.235351	0.862187	0.418903
			1.88682	1.13017	1.36066	0.395361	0.92572	0.293817	0.70029	0.527782
			1.66264	1.53855	1.43925	0.465489	1.19884	0.296987	1.41856	0.670506
			0.86643	1.19352	1.64413	0.576327	0.904308	0.406629	1.23944	0.612443
			1.15475	1.70515	1.33522	0.414678	1.15163	0.300128	1.34163	0.531709
			1.0073	1.21098	0.755518	0.511686	0.711225	0.363171	1.42717	0.496121
			0.854761	1.87265	0.768245	0.498996	1.13804	0.267082	1.54287	0.528538
			0.853947	0.971347	0.731544	0.553904	0.91821	0.238544	1.49298	0.607302
			1.29353	1.42158	0.62709	0.444287	0.709083	0.275903	0.944444	0.538608
			1.40706	1.73174	0.669617	0.910995	1.0481	0.379054	0.815367	0.521324
			0.933127	1.49036	0.762141	0.586253	0.78509	0.278541	1.62694	0.390287
			1.11194	1.60285	0.80205	0.744038	0.847916	0.347061	1.4106	0.452506
			0.916361	1.45633	1.03807	0.764474	1.38067	0.363366	1.39461	0.452506
			1.14997	1.67429	0.632325	0.721577	1.24637	0.366545	1.7748	2.66807
			1.23579	1.20889	0.895078	1.03792	1.14923	0.363579	1.75503	2.47889
			0.987138	1.57676	0.718266	0.804057	0.84902	0.575471	1.52479	2.86362
			1.2081	1.43451	0.687227	0.848146	0.741951	0.346623	1.625	2.22716
			1.01671	1.19843	0.55184	1.08428	0.739289	0.374515	1.33814	2.19053
			1.24224	1.35042	0.589269	0.68769	0.707425	0.527734	0.70876	0.570521
			1.31001	1.0616	0.669351	0.983188	1.07416	0.569782	0.70876	2.50155
			0.894552	2.28491	0.613047	0.75159	1.19086	0.783058	0.335671	2.86409
			0.776691	1.95135	0.566162	0.725729	1.538	0.398668	0.420909	2.65234
			1.10105	1.71054	0.55241	0.969793	1.32227	0.402752	0.630283	2.98721
			0.264934	1.66719	0.639803	0.982343	3.17436	0.496684	0.621184	2.64072
			0.709574	1.80422	0.498983	0.813609	2.31169	0.443444	0.537607	3.04283
			0.947416	1.70161	0.687719	0.798384	1.12374	0.319879	0.420221	2.44861
			0.846456	1.62551	0.511382	0.847059	1.3866	0.409427	0.450426	2.16234
			0.909825	1.02685	0.568044	0.846057	1.076	0.748197	0.583969	2.75561
			0.948081	1.5543	0.646476	0.85178	0.967873	0.668786	0.475765	2.05686
			0.805938	2.21616	0.422396	1.07028	1.06798	0.381159	0.474141	3.18815
			0.999633	1.93715	0.652895	0.829601	0.962744	0.281001	0.459656	2.09118
			0.753931	1.88868	0.451236	0.805333	0.877233	0.390712	0.415933	2.69561
			0.929194	2.02448	0.687257	0.805515	2.58518	0.554471	0.784514	2.46693
			0.939573	1.55405	0.469423	1.05773	0.883353	0.225449	0.576977	3.29267
			1.74812	1.60679	0.506503	0.883826	0.95555	0.304793	0.763963	2.33859
			0.865705	1.4559	0.449928	0.758046	0.851444	0.42469	0.524092	2.60849
			1.12049	1.96107	0.558673	0.76838	0.96742	0.740168	0.399861	1.96154
			1.00474	2.02795	0.512609	0.816848	0.933021	0.328719	0.7211	2.21173
			1.1996	2.23922	0.607903	0.93586	0.892423	0.479565	0.593243	2.01672
			0.663168	2.0831	0.552135	0.811729	0.964447	0.537304	0.413431	2.49946
			1.96643	1.70514	0.548676	0.906465	0.867131	0.293903	0.478006	2.69862
			0.957399	1.62151	0.487362	0.890539	0.756149	0.305981	0.360977	2.3726
			2.25228	1.52607	0.539458	1.09825	0.736225	0.427907	0.523008	2.18024
			0.707039	1.78183	1.12377	0.683594	0.979788	0.335534	0.53338	2.25262
			0.885413	2.45003	0.598534	1.06754	0.833576	0.284667	0.570036	2.22409
			1.05354	2.85548	0.612573	0.859172	0.736753	0.62192	0.706456	2.34087
			0.962539	2.4628	1.18539	0.973412	0.815015	0.343083	0.579642	2.1892
			1.38379	1.49873	0.986903	1.10154	0.808955	0.618809	0.19265	2.30144
			2.21314	1.81273	0.577633	0.777605	0.827154	0.297093	0.538876	2.13076
			2.1146	2.95628	0.627357	0.990937	0.557207	0.555805	0.555447	1.79988
			0.866681	2.7657	0.39709	1.03808	0.906839	0.392407	0.615857	2.22951
			1.03302	1.83186	0.422432	0.640956	0.56175	0.453391	0.554849	2.29599
			1.04846	3.5682	0.825909	0.986239	0.576995	0.56873	0.572519	0.599159
			0.748383	2.30474	0.503531	0.72734	0.624684	0.358931	0.47796	1.846
			0.943239	2.37059	1.30415	0.94699	0.882406	0.482634	0.583505	0.791524
			0.884372	2.69141	0.545965	0.715375	0.689519	0.640936	0.437712	2.55202
			0.967099	2.23271	0.519181	0.821776	0.557011	0.482211	0.459396	2.73654
			1.03308	2.17817	0.758092	0.785277	0.779348	0.677454	0.505379	2.70417
			1.22222	2.55119	0.38027	1.12299	1.71593	0.903406	0.61251	1.91805
			0.279653	2.28804	0.749018	1.11694	0.606506	0.444134	0.442104	2.51874
			2.01857	2.27844	0.565474	1.05739	0.718753	0.637739	0.555108	2.1649
			0.325733	2.09014	0.678137	1.16266	0.871535	0.730187	0.547423	1.71769
			1.43262	1.83722	0.418676	0.709883	0.63612	0.706411	0.545884	2.06332
			0.409592	1.88021	0.7215	0.74598	0.769708	0.719794	0.510529	2.35698
			0.323673	2.6863	0.546663	0.70654	0.96238	0.638194	0.501278	0.746775
			1.09968	2.35922	0.36682	0.803279	0.831988	0.645472	1.11783	0.792476
			0.992761	2.23216	0.630408	0.692969	0.958207	0.805043	1.46981	2.00677
			0.897674	2.37898	0.51982	0.72093	0.837367	0.600378	1.31222	1.97987
			1.66066	2.57542	0.379253	0.777999	0.749903	0.838849	1.53364	0.487668
			0.902764	1.69452	0.450951	0.894683	0.779983	0.628467	1.37041	1.4724
			1.10767	1.65184	0.844693	0.794133	0.810015	0.463289	1.4331	1.69832
			0.851022	1.53202	0.464083	1.60924	0.75923	0.550226	1.53536	0.469965
			1.39646	1.18853	0.730825	1.11563	0.843254	0.653038	1.38666	1.5294
			1.53941	1.51619	0.567146	1.74832	0.872129	0.604478	1.34388	1.47606
			1.4965	1.11083	1.23788	1.40291	0.87848	0.274681	1.64038	1.148
			1.41809	1.39225	0.659369	1.60963	0.805644	0.339092	1.37041	1.07462
			1.35102	0.959713	0.991381	1.35471	1.05495	0.544505	1.49052	1.30242
			1.11111	0.788595	1.02604	1.46537	0.793948	0.499305	1.16266	1.48857
			1.01335	1.39347	1.06378	1.56294	0.98391	0.752779	1.50909	1.11962
			1.01401	1.70366	0.548025	1.40165	0.840675	0.570841	1.41104	1.5464
			1.20318	0.898665	0.916355	1.84881	0.835966	0.780261	1.33174	1.07805
			1.31925	1.32287	1.00598	1.15637	0.754602	0.624861	1.20538	1.58445
			0.946208	0.749138	0.785663	1.59158	0.932302	0.599983	1.28657	1.40699
			1.31845	1.60873	0.964728	1.66123	1.12811	0.582884	0.967629	1.45337
			1.1954	1.67909	0.715929	1.3543	0.839521	0.428183	1.36336	1.44962
			1.08499	1.23045	1.0004	1.44705	1.03213	0.877618	1.13732	1.34939
			0.947431	1.42677	0.897871	1.84058	1.21912	0.580704	1.24286	1.45569
			1.1184	1.14881	0.775328	1.72506	0.978264	0.316826	1.1826	1.40351
			1.41056	1.79122	0.931153	1.29479	1.1614	0.765164	1.07815	1.42561
			0.879016	1.3603	0.728663	1.91704	0.892342	0.525689	1.24497	1.1913
			1.24258	1.13411	0.959142	1.49975	0.754362	0.789251	1.18388	1.82971
			1.59914	1.38478	0.675365	1.54599	0.611362	0.334077	0.991505	1.59678
			1.27569	1.29008	0.69311	1.17173	1.17956	0.2768	1.26528	1.45738
			1.44613	1.24815	1.15619	1.09599	0.760505	0.447167	1.004	1.16985
			1.59811	0.631266	0.625977	1.65301	0.838394	0.499932	1.41631	1.83121
			1.40625	1.40686	0.730332	1.39396	0.986908	0.425622	1.46781	2.1562
			1.3819	1.31777	0.878567	1.2684	0.862684	0.675537	1.29812	1.83126
			1.12157	1.25322	0.888493	2.15503	0.852815	0.378976	1.23049	1.6882
			1.18746	1.51189	0.986786	1.18952	0.713169	0.464045	1.36381	1.66186
			1.54453	1.13398	0.716181	1.3681		0.437041	1.18525	1.53329
			1.50894	1.47116	0.78023	2.5058		0.642929	1.20516	2.08868
			1.42533	1.38387	0.532791	1.51299		0.542566	1.26884	1.64458
			1.6088	1.45892	1.24143	1.50092		0.608429	0.976739	1.32954
			1.03512	1.28359	1.04843	1.49453		0.719879	1.24368	1.60527
			1.41099	1.39522	0.996226	1.28463		0.306298	1.62847	1.46068
			1.8669	1.35358	0.836222	0.915325		0.426673	1.52949	1.83163
			1.78573	1.40466	0.620272	1.46315		0.369188	1.36207	1.69191
			1.41403	1.51544	0.91842	1.23619		0.400375	1.63951	1.72744
			1.42362	1.75122	0.800306	1.39386		0.409645	1.52989	1.43192
			1.43295	2.34631	1.14504	1.11241		0.483029	1.5711	1.86169
			0.948472	1.16209	0.759697	1.40276		0.36297	1.53063	1.73806
			1.19198	1.77514	0.834722	1.58612		0.433434	1.41449	1.60625
			1.55852	1.52478	0.873993	1.33056			1.93697	1.62519
			1.62837	1.58514	0.664834	1.74961			1.27067	1.5008
			1.54849	1.74649	0.573303	2.11661			1.40633	1.95548
			1.4037	1.39808	1.01563	1.55803			1.54528	1.49128
			1.53157	1.81383	0.745556	1.40872			1.74519	1.85737
			1.59641	1.87485	0.697751	1.31566			1.50521	2.06697
			1.81595	1.28555	0.888249	1.73703			1.62853	1.78287
			1.56544	1.39453	0.545776	0.612453			1.59256	1.40688
			1.46005	1.8682	0.962336	0.668018			1.63925	1.51598
			1.47538	1.69029	0.784654	2.21646			1.50015	1.71175
			1.36388	1.3707	0.951396	2.43585			1.60357	2.20516
			1.7172	1.3454	0.914351	2.22851			1.31422	1.88126
			1.72274	1.32575	1.10238	1.92404			1.40577	1.74123
			1.50961	1.54867	0.911949	1.87545			1.16311	1.90797
			1.11521	1.71251	0.871168	1.49248				1.64845
			1.88067	1.75766	0.955085	1.43125				2.40791
			1.18762	1.85903	0.777239	2.55659				2.01887
			1.09724	1.3556	1.04831	1.28469				1.83698
			1.53848	1.24812	1.08471	1.64546				1.85367
			1.4086	1.44758	1.0336	1.46582				1.81389
			2.15364	1.30216	0.715724	1.79411				1.89134
			1.95133	1.28241	0.889536	2.02191				1.78824
			1.57248	1.35263	1.13487	1.84645				1.51024
			1.69537	1.242	0.710134	1.36578				1.5952
			2.25034	1.22644	0.969174	1.55176				1.90575
			1.83544	1.08561	0.772335	2.14263				1.64436
			1.5731	1.44261	0.644634	1.62774				0.890233
			2.2394	1.04174	0.618202	1.65081				0.968949
			1.42775	1.47442	0.836356	1.896				0.955866
			1.22364	1.35971	0.839413	1.53577				1.05226
			1.15966	1.44687	0.985942	1.16939				1.27215
			1.19672	1.4974	1.01798	1.49982				0.956314
			1.4694	1.29795	1.01751	1.15456				0.835716
			1.82784	1.42427	0.793314	1.62851				0.867427
			1.15841	1.36228	0.817709	1.60489				1.76471
			1.35247	1.46557	0.747083	1.21498				1.08665
			1.40641	1.17082	1.11799	1.26982				1.05546
			1.31711	1.32866	0.957038	1.3415				0.943493
			1.94913	1.64676	0.802804	2.09302				1.03056
			1.54321	1.50436	0.820825	1.95712				1.23975
			1.83039	1.63204	1.21912	1.39162				1.10558
			2.21428	1.59562	1.12317	1.31891				0.946956
			1.83354	1.65608	0.549339	1.31562				1.12155
			2.04244	1.59547	0.46686	1.66756				1.10871
			1.81022	1.88058	0.521538	1.38137				0.862353
			1.98835	1.23733	0.434585	1.93644				1.13102
			1.32051	1.30829	0.486737	1.22446				1.01161
			1.79625	2.01886	0.429716	1.91315				0.891145
			2.19765	2.01868	0.39164	1.8682				1.08493
			1.2921	1.80842	0.439635	1.29302				0.880012
			2.17021	2.18928	0.353369	1.19433				0.994919
			1.63121	2.31905	0.470663	1.31452				1.02581
			2.22932	2.68346	0.728222	1.4253				1.0707
			1.58336	2.28155	0.336817	1.61728				0.934868
			1.39647	2.06828	0.653675	1.73352				0.910687
			1.31548	2.30009	0.586076	1.28118				1.0206
			1.59799	2.2144	0.453835	1.60299				1.02502
			2.09727	2.13151	0.411276	1.30089				1.1271
			1.44011	2.35637	0.574211	1.22799				0.733003
			1.22216	2.35881	0.330875	1.5053				1.7093
			1.47042	2.20551	0.450988	1.37951				2.05049
			1.69914	2.43051	0.484397	1.37462				2.06886
			1.89273	2.28939	0.339172	0.43873				1.54345
			1.42283	2.3151	0.316325	2.64433				2.4038
			1.45165	2.68932	0.35753	2.73047				2.13877
			1.7038	2.62943	0.380238	2.7905				2.28581
			1.42617	2.05136	0.445152	2.85407				2.05618
			1.67784	2.43282	0.435354	2.54543				2.60303
			1.63218	2.26058	0.428824	3.30098				2.00479
			1.96098	2.55432	0.531418	2.57562				2.13014
			1.79199	2.71453	0.442459	2.72779				2.06589
			2.08316	2.34488	0.400077	2.7379				2.54015
			2.06656	2.21524	0.705742	2.54852				2.49734
			1.29861	2.64233	0.433598	3.31137				2.04225
			2.13058	2.29941	0.98136	2.55287				1.31403
			2.10535	2.39345	1.23736	2.49937				1.76851
			2.03864	2.80083	1.03383	2.82655				2.41298
			1.73929	2.21104	1.42309	2.38853				2.14327
				2.22035	1.43646	2.6941				2.32958
				2.40912	0.991716	2.21673				2.30143
				2.18251	0.942212	2.85636				2.0374
				2.40283	1.10299	2.88855				2.33745
				1.97861	0.848169	2.1951				2.67756
				2.54879	1.12572	2.7333				1.69907
				0.754429	1.38307	2.99755				1.81297
					0.880509	2.00472				2.36902
					1.32269	2.71101				1.94338
					0.857029	1.98517				2.43067
					1.03399	2.09155				2.67567
					0.719167	2.50299				1.82327
					2.00434	2.28112				2.95879
					0.915254	2.33158				2.04565
					0.923956	1.87502				2.36322
					0.950678	1.70727				2.04847
					1.04358	2.47986				2.14245
					1.22186	1.85012				2.31173
					0.614635	0.985787				2.49825
					0.642506	0.958021				2.0538
					0.955012	0.697344
					0.951731	0.581828
					0.861544	0.749418
					1.06621	0.571887
					0.749699	0.752227
					1.10532	0.761619
					0.664799	0.933562
					0.684422	1.06042
					0.748221	0.633829
					0.6048	1.04505
					0.958271	0.879066
					0.713141	0.873196
					0.71079	1.17355
					0.937867	0.659964
					1.02069	0.773317
					0.838339	0.762334
					1.02305	0.622721
					0.683633	0.84799
					0.740265	0.84309
					0.650617	0.981413
					0.9345	1.22152
					0.718996	0.644786
					1.11361	0.824606
					0.561337	0.915224
					0.838462	0.757354
					0.672619	0.898836
					0.815373	0.711695
					0.543382	0.766842
					0.82537	0.712579
					0.655387	0.976634
					0.608692	0.863713
					0.826636	0.812455
					0.819797	0.692592
					0.603217	0.855247
					0.686355	0.751142
						0.675772
						0.719164
						0.740329
						0.691638
						0.716096
						0.805001
						0.724092
						0.707507
						0.737682
						0.756242
						0.968785

## Sheet: Figure 6N-cleaved CHERRY
	% of NUC-1::CHERRY cleavage
	WT				daf-2(e1370)				daf-16				daf-16;daf-2				skn-1(zj15)				daf-2;skn-1				daf-16;skn-1				daf-16;daf-2;skn-1
	31.6675	42.7402	42.7402	29.5432	76.5898	73.4449	59.5407		51.79	36.4775	47.8913		40.2175	51.3425	37.6351		38.8838	26.4107	40.9002		48.7853	54.5764	52.8353		44.736	33.2929	40.7832		41.3677	34.0063	49.447	39.8523
		The numerical data are analyzed by GraphPad Prism 6 and represented as a bar graph in Figure 6N
