# Supplementary material for: Lysosome activity is modulated by multiple longevity pathways and is important for lifespan extension in C. elegans
Source: eLife. 2020 Jun 2;9:e55745. doi: 10.7554/eLife.55745 (PMC7274789; doi:10.7554/eLife.55745)
Supplement: Figure 7—figure supplement 1—source data 1. [file elife-55745-fig7-figsupp1-data1.xlsx]

## Sheet: Figure 7-S1A-daf-16-eat-2-skn- 
		daf-16;eat-2; skn-1 vs eat-2
			daf-16;eat-2					eat-2;skn-1					daf-16;eat-2;skn-1
		lysosomal genes	relative mRNA level of lysosomal genes			Mean	SD	relative mRNA level of lysosomal genes			Mean	SD	relative mRNA level of lysosomal genes			Mean	SD
		vha-12	0.626835	0.207617	0.683909	0.50612	0.260082	0.2664	0.433018	0.409308	0.369576	0.0901356	0.193105	0.210989	0.142274	0.182123	0.0356496
		vha-15	0.685179	0.484319	0.707156	0.625551	0.122803	0.613479	0.41068	0.895744	0.639968	0.243615	0.237436	0.108859	0.162616	0.169637	0.0645754
			The numerical data are analyzed by GraphPad Prism 6 and represented as a bar graph in Figure 7-figure supplement 1A.

## Sheet: Figure 7-S1B-daf-16;isp-1skn-1 
		The numerical data are analyzed by GraphPad Prism 6 and represented as a bar graph in Figure 7-figure supplement 1B.
	daf-16;isp-1 control RNAi					isp-1 skn-1 RNAi					daf-16;isp-1 skn-1 RNAi
lysosomal genes	relative mRNA level of lysosomal genes			Mean	SD	relative mRNA level of lysosomal genes			Mean	SD	relative mRNA level of lysosomal genes			Mean	SD
asp-4	0.170307	0.600257	0.714952	0.495172	0.287127	0.731476	0.597225	0.751105	0.693269	0.0837533	0.485685	0.611658	0.650017	0.582453	0.0859706
asp-8	0.0861	0.055661	0.39474	0.178834	0.187599	0.389614	0.584027	0.603872	0.525838	0.11839	0.540766	0.593119	0.837266	0.65705	0.158251
asm-1	0.86023	0.841415	0.62133	0.774325	0.132831	0.293424	0.136367	0.629915	0.353235	0.252152	0.584027	0.872437	0.83605	0.764171	0.157067
Y105E8B.9	0.911497	0.597225	0.429263	0.645995	0.244788	0.826179	0.256293	0.696767	0.59308	0.298757	0.625215	0.731476	0.679314	0.678668	0.0531334

## Sheet: Figure 7-S1D-cleaved CHERRY
% of NUC-1::CHERRY cleavage
WT						eat-2						daf-16(mu86)						daf-16;eat-2						skn-1(zj15)						eat-2; skn-1						daf-16;eat-2;skn-1
55.0589	50.718	43.8542	59.7193			84.5323	70.2554	69.864	88.7383	75.6534	70.7501	41.7369	42.4439	44.8936				63.7388	45.5234	52.4592	62.7255	53.172	72.7643	62.4241	60.9392	49.6237				62.3537	67.508	64.4237				55.7615	52.5234	50.3661
	The numerical data are analyzed by GraphPad Prism 6 and represented as a bar graph in Figure 7-figure supplement 1D.

## Sheet: Figure 7-S1F-cleaved CHERRY
% of NUC-1::CHERRY cleavage
Control RNAi												skn-1 RNAi
WT			isp-1(qm150)			daf-16(mu86)			daf-16;isp-1			WT			isp-1(qm150)			daf-16(mu86)			daf-16;isp-1
63.1974	52.5363	49.8354	75.3665	68.213	72.7643	59.902	50.5767	66.5404	51.2078	50.8944	62.5825	67.2875	63.3437	54.3021	72.4796	68.9632	65.7892	55.8637	59.6192	63.2192	66.5633	68.9122	50.2893
			The numerical data are analyzed by GraphPad Prism 6 and represented as a bar graph in Figure 7-figure supplement 1F.

## Sheet: Figure 7S1H-cleaved CHERRY
	The numerical data are analyzed by GraphPad Prism 6 and represented as a bar graph inFigure 7-figure supplement 1H.
		% of NUC-1::CHERRY cleavage
		eat-2 control RNAi			eat-2;pha-4RNAi
		76.8823	73.8825	87.1887	91.8418	84.7703	89.023

## Sheet: Figure 7S1J-cleaved CHERRY
	% of NUC-1::CHERRY cleavage
	WT					isp-1(qm150)					hif-1(ia4)					isp-1;hif-1
	48.2158	61.856	52.5363	41.7149		73.3665	87.0353	72.7643			40.0054	61.1829	60.9392			77.4172	61.856	78.9792
		The numerical data are analyzed by GraphPad Prism 6 and represented as a bar graph in Figure 7-figure supplement 1J.
