# Supplementary material for: Lysosome activity is modulated by multiple longevity pathways and is important for lifespan extension in C. elegans
Source: eLife. 2020 Jun 2;9:e55745. doi: 10.7554/eLife.55745 (PMC7274789; doi:10.7554/eLife.55745)
Supplement: Figure 7—source data 1. [file elife-55745-fig7-data1.xlsx]

## Sheet: Figure 7A-daf-16;eat-2
		daf-16;eat-2 vs eat-2
	lysosomal genes	relative mRNA level of lysosomal genes			Mean	SD
	lmp-2	0.850189	0.808553	0.605416	0.754719	0.130966
	slc-36.2	1.34403	1.13434	3.01676	1.83171	1.03162
	ncr-1	2.20347	1.64198	3.95726	2.6009	1.20772
	vha-2	1.09349	1.02254	0.287573	0.801202	0.446228
	vha-3	0.996065	0.882836	0.357125	0.745342	0.340939
	vha-4	1.50483	1.45789	0.691595	1.21811	0.456576
	vha-6	1.07471	0.79612	0.982479	0.951104	0.141922		The numerical data are analyzed by GraphPad Prism 6 and represented as a bar graph in Figure 7A.
	vha-19	1.12215	1.12799	0.629815	0.959985	0.285951
	vha-8	0.498911	0.318075	0.256761	0.357916	0.125895
	vha-12	0.535342	0.626835	0.207617	0.456598	0.220423
	vha-15	0.603779	0.685179	0.212716	0.500558	0.252579
	Y105E8B.9	1.45794	2.78108	3.2344	2.49114	0.923041
	pho-1	1.25737	1.16285	1.53794	1.31939	0.195084
	lipl-7	3.26394	4.47031	5.64982	4.46136	1.19297

## Sheet: Figure 7B-eat-2;skn-1
	eat-2;skn-1 vs eat-2
lysosomal genes	relative mRNA level of lysosomal genes			Mean	SD
lmp-2	0.410086	0.312634	0.544876	0.422532	0.11662
slc-36.2	1.52679	1.49582	1.93187	1.65149	0.243309
ncr-1	1.26576	0.670089	1.46663	1.13416	0.414254
vha-2	0.326758	0.224487	0.299785	0.283677	0.0530042
vha-3	1.17553	0.936995	1.1708	1.09444	0.136374
vha-4	1.02253	0.602742	1.07885	0.901375	0.260152	The numerical data are analyzed by GraphPad Prism 6 and represented as a bar graph in Figure 7B.
vha-6	2.24443	1.42328	4.5096	2.72577	1.59847
vha-19	0.882725	0.75819	0.817902	0.819605	0.062285
vha-8	1.59766	0.8236	1.25788	1.22638	0.387989
vha-12	0.274904	0.2664	0.433018	0.324774	0.0938387
vha-15	0.228775	0.283421	0.244008	0.252068	0.0282006
Y105E8B.9	7.9075	5.53058	4.425	5.95436	1.77951
pho-1	0.754248	0.680036	0.909408	0.781231	0.117042
lipl-7	0.817632	1.00673	1.42169	1.08202	0.308986

## Sheet: Figure 7K-pHtomato
		Average intensity of pHtomato per lysosome
		Control RNAi				skn-1 RNAi
		WT	eat-2	daf-16	daf-16;eat-2	WT	eat-2	daf-16	daf-16;eat-2
		63.85	46.34	93.13	36	180.6	85.78	127.03	124.99
		48.13	18.59	91	37.22	174.06	111	152.29	161.35
		54.96	19.41	72	37.7	93.8	90.17	95.33	99.78
		46.53	16.17	64.3	55.18	167.65	82.4	168.62	171
		48.38	18.5	86.13	32	173.03	61.36	127.06	103.82
		59.27	54.39	75.38	30.9	168.95	75.87	78.18	178
		73.74	16.9	55.5	41.43	147.74	93.96	103.15	168.41
		59.56	22.23	113.92	40.77	119.11	135	83.15	84.09
		37.92	25.54	110.81	39.48	113.25	127.88	99.84	160.95		The numerical data are analyzed by GraphPad Prism 6 and represented as a bar graph in Figure 7K.
		66.72	15.4	64.6	96.75	161.61	64.08	81.86	163
		69.03	20.4	164.08	39.8	161.92	112.76	116.3	154.17
		43.62	24.71	97.23	58.25	174.75	74.82	86.36	156.08
		89.52	15.42	73.28	32.83	179.78	73.21	142.58	110.94
		47.68	17.97	140.19	30.5	124.9	70.31	150.51	131.74
		83.1	24.76	78	38.03	132.78	72	160.33	164.75
		51.86	22.36	93.07	38.13	102.47	120.91	72.7	201.52
		48.37	28.1	79.58	29.09	147.75	71.18	132.24	114.38
		48.33	25.19	79.53	38.94	100.79	61.59	101.59	98.62
		41.32	18.25	66.89	33.73	119.61	57.3	118.72	84.91
		50.56	24.06	92.5	44.84	143.11	165.06	86.97	116.42
		42.08	18.47	153.18	33.17	146.71	155.72	81.21	179.59
		45.5	28.9	124.3	46.53	167.76	147.06	83.63	202.3
		69.15	24.63	104.75	35.94	146.67	206.25	122.38	190.4
		122.73	17.55	61.8	36.31	110.13	164.1	87.92	95.31
		42.17	20.71	80.32	33.2	117.54	108.6	102.1	99.67
		71.82	22.04	65.23	59.88	113.39	176.4	140.95	115.57
		52.15	16.12	145.48	169.03	156.98	181.04	94.67	147
		77.22	17.19	84.36	60.36	122.05	189.46	78.77	111.81
		77.16	15.83	61.05	73.46	142.82	181.46	81.6	146.33
		37.7	22.93	91.85	56.33	181.43	188.89	136.39	176.65
		54.04	24.42	62.8	72.84	97.16	132.04	85.13	136.92
		53.58	16.5	66.92	70.05	173.82	107.4	121.9	106.08
		102.95	27.74	87.34	87.2	214.37	141.53	173.71	143.3
		69.06	16.9	124.91	73.86	176.29	30.45	89.25	92.22
		86.26	24.9	64.5	80.79	173.1	39.17	171	159.42
		55.4	28.21	82.04	56.06	99.13	77.37	142.32	106.72
		55.78	18.27	72.58	140.83	107.76	36.94	106.76	120.4
		47.74	27.47	121.08	70.05	209.24	57.63	196.3	98.15
		58.87	30.39	101.43	52.3	132.67	59.6	89.6	80.07
		71.29	25.89	81.63	61.46	114.54	45.78	104.87	206.66
		91.49	20.82	121	74.41	174.3	37.72	190.22	123.21
		70.62	28.75	102.8	60.65	128.81	46.58	173.5	119.82
		170.49	15.88	89.9	58.64	110.5	65.96	107.74	91.57
		70.05	21	76.82	69.1	200.78	76.18	119.12	105.6
		94.92	28.75	122.88	74.21	178.24	58.54	140.76	49
		89.65	28.8	60.69	56.83	108.28	43.4	91.71	73.41
		110.34	28.35	86.65	53.07	165.22	77.8	85.58	72.68
		87.29	27.73	100.28	101.9	98.71	58.82	109.88	107.71
		156.8	10.79	68.42	58.8	108.47	67.64	92	41.49
		73.62	12.84	145.88	98.58	113.83	37.07	106.74	57.71
		103.73	14.96	84.67	85.62	181.79	31.31	170.36	73.21
		70.63	13.31	116.11	70.17	117.26	29.17	80.47	63.59
		129.87	11.97	65.92	58.11	99.29	40.09	81.28	58.24
		69.73	11.61	65.23	57.83	126.75	45.81	177.7	47.56
		77.08	9.17	103.25	66	104.12	34.09	102.03	58.49
		67.04	10.31	65.35	21.15	94.82	39.21	173.46	36.72
		85.28	6.86	80.23	12.56	100.94	47.69	153.85	63
		79.7	7.75	72.03	16	130.71	63.94	105	53.01
		150.31	11.29	60.53	12.89	125.38	32.54	85.73	48.94
		83.52	10.07	119.76	24.48	148.69	26.67	175.19	42
		73.31	16.08	170.72	15.88	153.83	32.14	97.81	60
		108.56	8	66.4	21.08	128.01	23.91	117.9	48.67
		41.24	7.25	115.81	18.92	173.06	32.36	164.45	55.98
		45.27	6.5	69.3	35.61	190.79	44.45	148.2	77.53
		60.52	6.91	138.31	14.81	149.26	26.67	172.33	60.66
		63.08	7.72	133.09	28.04	128.83	47.79	175.42	55.32
		61.5	13.05	77.8	21.68	154.82	35.6	105.5	47.72
		51.26	9.64	82.07	13.38	102.76	27.72	139.67	38.07
		42.81	14.39	106.38	15.55	182.38	31.86	155.83	46.6
		56.46	10.78	163.97	15.07	76.55	47.68	184.48	39.83
		57.86	17.18	71.56	14.92	122.67	19.07	190.1	44.32
		46.42	11.63	76	29.45	102.46	23.74	130.2	40.4
		46.68	16.73	68.71	25.73	148.7	20.71	184.05	52.87
		80.32	11.42	103.55	21.91	138.16	21.68	186.21	168.32
		74.59	20.07	160.33	20.44	114.5	25.14	86.3	139.3
		80.94	18.11	96.8	18.48	126.06	33.02	107	187.59
		54.21	13.49	67.09	20.77	105.6	32.21	136.21	178.67
		54.32	15.91	156.52	24.77	86.5	23.77	138.93	106
		43.89	14.11	64.52	19.39	126.21	32.33	114.14	167.95
		91.06	12.3	74.62	15.31	104.5	33.2	163.4	123.8
		103.97	10.38	71.93	18.16	109.81	24.7	130.78	128.62
		49.76	16.03	70.73	22.82	160.52	29.98	113.48	193.31
		56.8	18.46	150.35	26.35	124.56	34.35	134.71	147.14
		60.95	11.53	131.42	13.79	108.67	20.36	145.29	125.83
		54.82	11.58	151	16.46	195.39	29.15	154.79	159.8
		61.17	9.85	114.68	18.98	120.06	42.95	103.63	184.77
		90.03	8.25	164.98	17.54	125.91	44.74	184.2	137.89
		77.93	12.09	108.14	13.51	112.77	54.7	85.71	146.6
		83.03	12.03	155.32	15.19	135.84	33.66	90.38	166.14
		50.09	9.82	109.45	47.25	115.27	33.91	154.96	109.71
		74.81	21.36	197.69	45.18	133.94	32.2	100.24	152.01
		56.64	33.99	153.27	36.8	160.49	65.97	140.13	101.15
		49.12	23.11	139.55	76.47	99.01	66.19	135.21	103.57
		42.1	33.34	118.37	42.74	207.79	91.19	177.53	123.64
		61.48	38.58	102.23	49.67	192.29	31.96	136.64	191.31
		42	30.82	135.2	69.07	110.43	45.89	108.73	177.64
		59.77	24.26	112.17	78.39	90.16	47.87	152.42	199.04
		48.32	22.75	188.49	43.46	97.76	34.65	170.6	132.35
		51.6	34.81	153.82	40.37	83.38	33.17	38.9	145.83
		68.71	30.84	98.53	42	167.75	57.62	43.5	102.2
		56.62	33.42	140.19	35.45	91.15	46.94	75.02	105
		74.75	31.13	114.07	57.84	123.04	53.02	59.27	118.81
		48.73	29.92	209.63	79.36	94.29	54	40.68	161.85
		40.2	28.94	214	44.5	80.45	29.8	47.28	141.47
		38.1	27.62	99	84.71	98.42	38.98	46.64	119
		45.01	25.83	190.96	42.78	119.7	50.17	56.96	112.91
		58.05	22.4	152.16	42.53	52.83	29.78	32.9	179.21
		47.36	20.88	106.85	40.73	69.38	54	45.6	127.58
		39.02	20.25	180.61	58.41	52.43	46.22	64.64	123.07
		52.59	33.47	161.37	62.77	63.44	59.25	64.07	158.72
		54.68	26.24	108.16	57.86	53.8	25.94	94.24	167.93
		51.82	34.16	151.46	90.17	77.78	26.64	43.38	156.66
		64.22	29.29	175.08	81.97	57.6	32.3	50.95	101.63
		70.56	27.56	179	58.13	65.15	36.69	58.79	167
		77.34	24.8	100.5	71.38	54.67	45.02	54.6	153.1
		57.85	30.79	125.44	84.62	63.84	35.31	80.6	101.64
		135.31	22.9	115.5	54.75	83.21	40.8	53.33	150.63
		55.23	24.15	126.65	101.86	98.2	44.55	41.32	123.72
		84.67	63.23	126.8	138.4	71.43	41.47	40.04	129.77
		70	20.36	162.2	61.11	102.36	29.37	52.66	167.29
		79.26	37.67	66	128.23	53.14	29.67	48.3	113.17
		52.35	50.12	89.29	68.96	92.07	28.48	41.57	147.71
		69.36	24.32	56.82	61.25	68.57	54.55	33.5	156.85
		81.82	31.14	52.03	61.41	83.73	30.6	52.39	147.53
		93.35	22.58	125	132.91	98.21	33.63	37.99	172.14
		105.62	15.39	86.13	134.06	138.65	50.86	113.23	189.55
		96.75	16.22	72.31	123.52	92.08	52.77	167.53	209.56
		57.34	15	50	179.96	90.2	74.91	161.18	134.65
		79.68	12.77	76.2	116.64	64.55	71.96	161.86	104
		69.56	14.44	51.03	174.86	61.78	67.6	198.58	124.75
		96.07	15.66	81.4	150.33	81.27	67.85	152.34	118.56
		114.25	17.71	70.33	154.04	61.27	75.57	181.25	95.91
		119.01	22.01	58.75	173.19	108.85	34.14	193.78	88.06
		61.59	19.63	105.72	143.42	117.2	31.13	168.17	121
		55.76	14	41.55	174.09	66.83	42.11	175.7	100.71
		66.74	14.47	73.63	136.11	73.84	46.56	221.77	100.26
		56.1	24.18	74.67	115.13	103.69	32.91	134.26	113.9
		68.25	13.94	45.18	150.54	99.66	34.5	195.74	161.6
		73.36	16.15	57.23	190.28	52.72	46.33	137.79	125.9
		75.38	22.94	71.16	82.29	76.06	52.82	181.16	79.88
		76.93	25.23	60.88	182.3	90.53	27.27	151.43	160.19
		33.6	15.97	48.91	96.8	58.94	42.91	112.32	130.03
		23.3	13	64.77	101.8	125.05	26.5	165.3	95.4
		38.57	15.94	93.95	98.84	73.63	36.7	133.2	150.97
		61.26	14.75	68.88	197.36	111.15	29.33	128.41	96.75
		40.94	14.23	70.92	165.71	83.06	29.02	183.61	136.25
		38.02	16.63	60	116.54	123.44	42.13	211.16	133.66
		33.52	31.98	76.71	160.22	70.25	37.78	157.31	97.47
		61.23	12.4	63.55	122.05	102.46	47.05	210.82	147.45
		40.93	14.33	58.88	87.07	83.41	30.54	216.03	95
		33.9	14.48	143.52	104.08	100.9	25.6	163.28	113.95
		34.21	17.47	93.12	128.61	92.52	56.95	145.71	88.29
		32.34	25.08	68.71	194.67	93.67	54.51	212.18	132.66
		33.78	14	72.5	196.14	59.98	92.25	205.46	96.06
		50.84	16.46	92	149.22	84.4	47.55	185.12	91.63
		28.69	13.5	88.66	90	65.27	117.32	120.23	114.02
		29.63	14.25	94.86	103	85.38	56.1	160.79	130.16
		51.45	16.91	112.97	88.47	60.47	87.34	199.79	78
		49.48	16.07	74.7	104.77	64.57	55.15	157.08	108.5
		27.73	22.05	136.23	108.45	104.85	39.1	134.32	94.54
		28.1	13.1	83.38	98.13	63.4	31.96	184.98	89.15
		42.59	26.72	80.52	100.32	141.63	41.35	183.72	149.91
		30.5	17.16	54.5	118.17	104.21	27.06	108.08	97.25
		25.39	16.11	79.15	87.36	57.13	24.67	187.17	96.07
		25.67	14.97	108.55	114.38	86.43	53.63	154.06	179.1
		38.18	31.57	134.59	94.91	72.23	58.82	137.47	90.6
		34.13	15.27	65.29	98.04	63.15	28.5	114.21	181.14
		25.88	20.34	111.39	165.68	113.75	30.32	125.79	94.29
		32.83	17.9	77.66	174.46	106.21	30.92	117.29	153.61
		47.96	16.02	60.61	111.57	95.51	43.38	130.27	77.58
		37.55	17.54	75.2	157.06	114.38	32.96	99.73	90.43
		46.36	13.56	67.77	183.7	93.56	69	104.5	85.75
		31	15.67	77.4	148.6	87.61	66.12	180.33	87.75
		52.43	17.91	90.06	94.5	108.53	79	160.62	88.68
		26.92	14.51	55.75	82.76	94.85	83.33	151.17	97.33
		24.93	14.59	96.6	96.79	60.8	42.7	156.59	92.53
		23.73	23.17	58.54	149.86	140.32	53.3	123.88	83.17
		35.85	18.46	78.85	186.14	97.03		121.35	91.18
		25.83	16.34	72.33	129.44	57.3		127.41	79.64
		39.19	19.86	103	100.24	112.02		118.88	114.49
		53.65	14.92	66.5	158.85	55.59		145.68	80.9
		26.66	18.23	54.64	102.62	94.65		105.4	120.03
		29.39	17.2	76.17	160.62	103.84		63.72	159.03
		45	13.33	77.6	134.8	91.56		101.49	75.13
		55.27	13.42	80.46	137.05	77.83		91.96	103.24
		26.67	27.34	97.52	172.64	70.58		92.13	95.64
		29.84	17.31	51.67	204.89	92.74		72.55	85
		30.39	22.6	59.94	115.61	70.88		132.8	77.45
		51.03	13.95	56.84		65.36		95.63	93.55
		59.44	17.1	77.75		86.39		145.92	93.78
		30.69	17.6	63.95		124.37		79.48	81.48
		36.08	13.89	84.13		101.87		107.59
		28.3	29.03	56.5		95.47		72.55
		37.45	18.35	109.55		114.65		82.91
		26	16.33	59.28		92.25		81.74
		106.56	18.71	63.94		108.67		70.4
		88	17.01	57.35		146.31		149.17
		81.47	21.11	150.77		106.56		77.03
		169.49	14.93	59.92		140.17		154.34
		95.16	16.6	93.78		95.55		136.65
		102.64	16.49	74.35		103.38		63.53
		136.86	22.57	67.3		129.88		78.23
		93.45	15.76	95		106.37		99.21
		148.3	15.63	82.29		107.37		96.55
		175.86	15.73	68.64		202.02		81.38
		145.48	12.8	158.78		145.84		70.27
		131.35	26.83	123.14		161.63		76
		163.56	22.32	73.64		100.36		133.25
		153.75	21.72	65.5		174.01		119.13
		86.94	16.03	149.86		127.05		95.83
		106	20.55	71.2		145.79		70.17
		77.19	14	86.63		176.65		94.67
		172.63		76.15		201.87		114.92
		157.67	17	66.83		111.1		88.49
		142.97	16.33	86.18		160.3		64.06
		139.2	24.66	64.52		94.55		80.45
		167.66	34.84	74.75		154.86		74.6
		100.81	17.75	133.68		122.33		30.17
		95	28.84	136.43		152.48		41.6
		88.05	14.5	80.74		139.92		39.68
		100.62	23.05	75.31		181.2		68.69
		86.95	31.2	58		124.35		82.96
		65	25.44	91.91		102.62		49.54
		72.48	34.67	60.6		105		44
		76.52	27.7	55.05		110.9		49.09
		71.32	24.43	103.65		192.64		64.55
		72.33	52.01	70.44		142.84		40.93
		74.55	51.22	74.56		140.57		39.79
		148.97	34.02	64.2		114.3		65.61
		70.5	35.05	57		178.81		35.52
		102.48	42.04	77.11		108.5		52.93
		107.55	27.76	78.01		177.74		53.55
		55.47	41.56	71.59		98.82		75.62
		55.36	28.58	56.57		196.28		34.13
		74.97	26.76	67.79		113		29.73
		69.43	23.12	62.44		144.38		38
		126.25	18.89	66.35		207.19		43
		110.18	47.38	108.14		190.57		46.38
		86.76	33.14	145.38		141.23		28.25
		60	23.48	99		172.28		32.33
		111.97	24.92	75.32		182.25		50.63
		58.5	21.08	150.47		163.57		35.74
		65.16	22.41	125.18		116		49.48
		139.24	18.44	106.86		120.5		65.66
		107.52	23.91	142.32		209.78		60.08
		97.07	17.27	120.38		217.95		71.45
		141.12	18.44	189.11		189.49		47.1
		110.95	18.38	137.23		210.34		27.86
		187.3	38.94	102.95		92.5		38.93
		186.62	24.48	90.06		200.75		40.12
		101.62	20.44	87.92		169.14		70.3
		159.05	18.86	112.4		159.72		54.94
		121.95	27.21	99.88		96.52		64.06
		106.41	25.72	113.38		175.04		41.81
		117.9	30.51	148.57		169.38		41.13
		135.15	25.14	189.17		209.67		61.71
		123.61	26.5	105.42		112.5		32.92
		104.92	33.02	131.77		105		35
		123.3	28.07	109.26		211.67		30.7
		162.1	26	129.07		134.28		43.88
		127.09	23.13	130.13		186.67		40.57
		104.92	25.1	83.1		150.42		31.9
		116.12	19.5	181.5		152.86		52.01
		146.96	27.44	101.63		125.07		32.43
		150.71	28.05	105		145		58.13
		209.37	23.16	121.63		163.02		45.72
		105.8	28.39	198.01		135.7		45.23
		163.19	19.71	106.73		189.19		30.6
		96.15	27.41	88.29		115.76		41.38
		191.13	25.04	148.81		120		50.59
		124.52	28.77	108.36		191.2		33.94
		109.89	32.73	152.87		169.14		38.19
		138.59	35.05	95.2		133.67		59.7
		104.91	26.47	105.52		171.4		51.32
		132.2	23.06	162.06		143.64		41.06
		102.71	41.94	141.72		167.91		34.62
		117.84	19	134.49		130.34		78.29
		126.65	18.62	102.7		116.4		60.45
		128.22	30.23	162.99		110.97		37.7
		100.18	27	97.19		104		28.29
		169.27	37.15	113.5		162.88		30.6
		168.43	35.8	101.39		193.81		78.53
		72.28	28.55	112.5		172.58		40.07
		60.1	43.73	144.32		147.58		46.85
		123.79	50.95	106.93		130.84		57.03
		65.59	74.19	169.63		202.22		31.29
		103.13	47.81	114.62		110.69		87.9
		80	31.68	154.68		123.93		133.18
		100.29	39.65	164.54		121.35		66.63
		132.97	52.77	142.57		142.76		103.2
		88.43	39.02	175.57		154.63		75.91
		121.59	31.27	109.5		116.3		133.72
		66.14	55.56	169.35		108.84		131.44
		89.74	40.73	125.98		154.17		165.47
		79.7	43.26	79.4		194.35		105
		82.9	33.62	91.71		114.26		80.64
		75.93	30.34	161.79		116.63		166.14
		121.13	30.21	87.24		102.4		77.73
		87.61	29.11	115.69		145.05		73.75
		98.76	30.31	152.85		109		127.17
		88.38	32.83	81.8		134.63		97.84
		61.21	33.95	109.41		174.28		86.05
		73.29	47.75	162.74		166.23		97.24
		85.96	29.75	85.27		133.51		135.48
		124.47	28.32	112.33		141.67		90.7
		82.09	28.3	119.96		123.05		135.05
		80.06	30.43	101.8		158.72		135.76
		83.97	36.93	108.25		120.17		122.63
		83.12	31.94	116.87		179.34		86
		104.38		89		83.09		173.9
		82.82	39.43	139.25		121.69		129.18
		117	49.11	142		108.64		92.26
		99.18	56.51	106.54		112.57		90.19
		102.68	29.56	115.51		131.14		71.42
		125.96	29	120.33		125.26		81.4
		78	33.6	220.08		139		123.11
		105.12	29.75	109		152		138.89
		135.02	30.27	80.15		181.83		91.75
		123.63	31.4	91.71		89.69		123.11
		151.65	29.9	187.81		156.03		137.06
		118.39	39.45	92.6		92.75		120.17
		154.17	30.35	107.76		116.13		78.19
		143.31	36.21	103.59		180.67		80.25
		122.89	42.12	83.6		106.86		103.49
		88.26	30.8	87.64		101.5		103.42
		92.09	31.5	104.63		139.5		82.59
		92.89		119.16		164.15		88.79
		134.21		93.42		173.09		79.46
		110.29		113.69		185.58		92.78
		122.78		89.29		98.17		73.82
		151.4		98.15		94.03		91.58
		99.79		96		99.88		138.34
		122.75		149.88		158.35		82.04
		178.6		74.9		171.03		93.72
		137.26		125.75		95		123.18
		90.94		96.4		128.25		71.16
		118.55		123		104.34		94.09
		126.68		75.95		95.93		115.1
		96.22		107.42		139.37		78.85
		128.82		96.59		169.1		48.11
		158.87		124.05		128.05		129.6
		168.96		84.62		112.5		98.97
		117.13		107.47		103.18		137.87
		77.14		103.55		93.5		95.39
		128.51		92.53		98.06		62.83
		175.77		90		84.75		63.48
		131.16		137		86.7		81.74
		146.45		92.41		89.72		52.83
		137.26		98.36		140.78		95.39
		89.73		70.58		98.08		73.29
		107.29		129.74		109.1		91.02
		100.76		123.71		113.95		66.5
		103.95		124.44		87.5		105.82
		78.9		134.46		182.62		65.25
		97.76		120.27		169.08		64
		97.25		108		113.14		120.3
		70.53		77.78		149.48		92.22
		90.3		152.73		158.48		70.01
		72.94		86.91		150.75		72.18
		81.05		115.48		93.83		61.65
		89.43		73.83		107.97		78.1
		64.02		107.79		105.19		90.16
		105.72		96.29		152.82		66.26
		69.38		119.47		184.6		91.61
		70.73		155.01		190.35		92.56
		79.02		99.56		102.33		54.23
		71.73		118.77		122.98		69.67
		48.25		51.25		106.82		100.37
		45.79		50.65		102.2		61.73
		86.31		44.12		91		79.6
		49.71		54.76		88.31		135.02
		88.96		43.23		149		123.66
		68.85		69.92		104.87		134.1
		74.4		43.78		116.78		81.55
		78.81		42.42		156.44		129.61
		50.05		46		87.14		62.43
		74.3		72.01		77.1		132.53
		69.12		46.8		162.36		62.69
		67.7		68.9		98.54		85.48
		51.93		60.13		150.7		48.64
		80.3		41.33		135.31		62
		63.77		34.92		140.7		199.58
		69.87		65.54		111.22		126.5
		94.16		46.07		80.21		174.78
		52.79		49.08		142.78		185.06
		121.07		39.73		173.37		180.7
		112.06		40.54		112.73		154.77
		189.41		53.72		91.41		181.05
		164.36		37.71		161.36		128.65
		111.08		41.25		111.36		186.51
		180.94		77.45		96.25		129.03
		144.7		41.45		118.24		122.58
		185.43		43.06		119.21		110.13
		187.79		115.34		101.72		196.61
		193.07		47.41		145.35		110.95
		119.29		38.25		168.88		179.36
		134.82		44.46		183.65		164.17
		99.61		73.3		78		158.09
		164.1		84.61		93.38		104
		139.03		77.2		94		122.28
		182.02		80.78		97.53		163.27
		170.38		46.42		160.49		172.22
		131.54		39.2		80.08		179.24
		140.16		41.56		133.76		142.31
		97.38		41.39		86.09		93.42
		174		43.43		118.64		179.13
		144.83		46.84		161.4		128.91
		135.84		37.67		102.21		184.35
		110.79		44.75		164.96		44.25
		173.64		95.1		99.03		54.65
		93.1		57.13		94.97		54.21
		89.13		42.5		155.38		71.22
		180.6		49.3		77.17		63.5
		185.79		66.74		163.98		58.73
		208.11		61.5		74.67		52.13
		162.26		35		147.07		75.86
		128.2		102.93		86.44		45.88
		184.24		47.82		126.97		61.69
		107.27		47.13		125.24		50.87
		146.25		92.5		98.32		49.88
		91.78		52.84		147.11		56.61
		182.77		37.83		102.04		50.08
		176.36		67.95		97.07		59
		130.45		53.36		110.65		83.52
		188.69		60.25		174.03		59.06
		97.55		122.12		82		66.4
		176.9		110.55		150.5		110.1
		196.81		56.76		155.66		63.6
		177.09		81.37		135.67		85.83
		166.36		59.8		138.14		90.52
		98.58		77.39		83.79		94.21
		184.06		77.22		98.84		113.65
		119.56		57.75		106.75		47.31
		144.36		70.94		100.8		61.1
		171.99		81.45		115.54		100.64
		96.87		71.66		86.91		54.77
		138.64		55.67		129.38		46.24
		132.63		136.1		105.38		88.22
		122.25		76.21		96		55.06
		189.09		94.58		97.83		127.98
		164.9		54.04		124.6		58.17
		133.16		92.02		173.1		53.13
		143.34		53.64		114.89		59.39
		129.73		60		170.26		117.52
		89.6		65.36		182.96		91.45
		143.95		55.69		89.81		44.46
		137		129.3		94.5		82.33
		149		80.69		92.43		113.37
		165.1		88.69		137.89		84.53
		147.35		75.83		87.89		75.04
		125		82.42		101.88		79.38
		113.36		70.18		108.07		67.47
		141.18		57.36		156.25		77.54
		133.8		49.77		135.13		115.11
		178.87		59.48		99.36		144.27
		131.38		66		157.54		132.42
		120.55		64.53		191.34		94.92
		161.41		70.87		116.72		149.73
		157.29				110.62		145.08
		162.35				173.91		159.23
						155.4		140.42
						184.16		168.16
						107.32		176.26
						172.8		181.09
						99.78		197.56
						106.71		121.38
						99.73		161.07
						115.64		124.79
						152.83		163.12
						115.17		121.47
						87.92		96.5
						114.91		165.58
						166.25		90.5
						180.88		106.64
						168.24		143.13
						92.97		185.57
						138.23		117.18
						116.28		206.22
						134.24		109.81
						156.74		103.58
						196.3		174.17
						135.87		132.36
						147.03		94.33
						157.33		129.92
						96		82.92
						92		123.71
						140.24		82.75
						120.85
						171.38
						147.43
						209.32
						131.13
						139.95
						146.52
						139.19
						213.42
						194.03
						213.13
						153.38
						215.14
						191.43
						219.31
						202.75
						194.86
						145.68
						160.4
						163.32
						194.58
						141.44
						165.55
						140.78
						211.48
						190.19
						133.49
						158.97
						152.9
						224.35
						177.47
						183.19
						181.75
						171.03
						180.07
						140
						123.18
						216.39
						131.65
						111.85
						191.59
						209.79
						107.38
						111.54
						176.09
						145.5
						164.76
						157.29
						199.07
						120.86
						195.86
						128.43
						187.26
						117.64
						206.95
						201.98
						188.43
						146.91
						164.21
						166.79
						209.55
						177.71
						138.21
						161.96
						213.39
						187.81
						181.1
						135.33
						181.29
						166
						124.45
						121.4
						141.75
						167.41
						183.07
						148.25
						139.09
						159
						157.7
						123.1
						143.94
						166.95
						139.2
						163.35
						164.66
						166.31
						170.92
						170.28
						174.04
						108.79
						163.18
						169.02
						175.52
						149.34
						172.15
						139.91
						183.53
						186.45
						131.33
						157.47
						97.6
						103.76
						201.5
						148.45
						176.85
						195.62
						140.76
						192.61
						192.81
						201.94
						176.35
						171.21
						200.64
						112.6
						182.82
						201.17
						211.72
						185.36
						129.56
						114.77
						199
						160.08
						186.73
						105.71
						198.27
						100.69
						111.12
						140.13
						199.57
						134.76
						178.24
						114.64
						186.09
						204.31
						127.6
						190.43
						127.71
						174.66
						147.44
						203.69
						126.27
						195.75
						193.21
						189.88
						170.27
						134.39
						179.17
						131.66
						115.14
						127.71
						153.39
						170.33
						186.06
						131.04
						159.42
						191.7
						143.18
						125.32
						198.61
						134.47
						144.59
						136.3
						170.25
						97.81
						82.32
						60.93
						102.68
						85.86
						153.67
						65.07
						81.79
						104.32
						65.89
						84.78
						101.02
						114.52
						67.66
						70.22
						71.6
						95.16
						110.2
						64.14
						71.48
						101.48
						64.13
						105.35
						62.91
						143.81
						119.03
						80.49
						131.26
						85.51
						57.12
						90.74
						114.77
						103.93
						60.15
						88.39
						92.47
						78.33
						76.71
						79.76
						109.85
						93.33
						60.71
						72.13
						81.24
						92.35
						63.32
						76.02
						89.67
						65.31
						109.07
						109.22
						59.3
						85.14
						83.36
						123.85
						83.5
						54
						71.11
						110.21
						87.84
						63.89
						77.67
						164.6
						107.22
						97.24
						131.22
						103.09
						97.82
						78.5
						69
						88.12
						64.95
						77.1
						109.43
						63.5
						96.67
						90.87
						92.83
						91.25
						135.88
						92.2
						91.46
						93.14
						138.86
						107.5
						83.1
						152.59
						94.33
						114.98
						138.67
						116.02
						69.69
						81.4
						133.09
						158.87
						143.6
						82.16
						108.55
						164.52
						108.22
						90.25
						81.21
						149.06
						119.71
						75.46
						74.09
						69.88
						93.7
						146.99
						105.41
						129.29
						79.24
						97.32
						186.73
						134.28
						127.89
						73.45
						82
						86.57
						91.3
						79.66
						145.68
						98.75
						82.6
						123.8
						116.48
						153.57
						107.69
						75.1
						136.14
						89.75
						134.44
						109.82
						100.92
						85.7
						116.09
						79.34
						77.93
						74.5
						164.36
						96.39
						91.97
						108.1
						74.57
						153.14
						101.22
						88.64
						136.73
						190.12
						87.29
						83.64
						88.44
						151.76
						106.16
						143.19
						90.78
						98.46
						118.64
						119.34
						91.49
						174.18
						73.42
						119.33
						75.94
						79.07
						183.35
						149.95
						81.16
						131.67
						88.6
						124.59
						93.69
						98.93
						91.51
						113.89
						74.31
						69.05
						73.1
						89.48
						160.21
						138.23
						85.9
						82.33
						86.54
						76.73
						87.43
						76.7
						71.73

## Sheet: Figure 7L-LSG-LTR
			Relative intensity of LSG/LTR in the intestine
			Control RNAi				skn-1 RNAi
			WT	eat-2(ad1116)	daf-16(mu86)	daf-16;eat-2	WT	eat-2(ad1116)	daf-16(mu86)	daf-16;eat-2
			1.03817	1.74172	2.32089	0.223397	1.2855	0.200634	1.49217	0.47182
			1.06988	1.90165	1.25141	0.23413	0.985	0.112456	1.72781	0.444853
			0.876582	1.80867	1.23549	0.219844	0.554926	0.232888	1.17166	0.489362
			1.08555	1.93964	1.04623	0.288383	0.60733	0.141557	1.35424	0.448029
			0.989179	1.49157	1.01869	0.247255	0.71939	0.204204	1.45298	0.424184
			1.09286	1.77029	1.11558	0.212587	0.743195	0.258115	1.18744	0.440536
			0.95657	1.92018	1.1114	0.216106	1.403	0.153262	0.984405	0.630996	The numerical data are analyzed by GraphPad Prism 6 and represented as a bar graph in Figure 7L.
			0.937367	1.64096	1.20666	0.293631	1.35206	0.217488	1.10173	0.45881
			1.00819	2.01396	1.74503	0.210296	0.521259	0.19693	1.06238	0.621236
			0.939619	1.95092	1.06256	0.327487	1.16413	0.245895	1.35411	0.457912
			1.15414	2.05614	1.04092	0.23495	1.19054	0.216903	1.93199	0.435294
			1.0543	2.62877	1.07605	0.37766	1.3637	0.286232	1.16018	0.533442
			1.13929	2.28373	2.29827	0.326014	1.31825	0.163265	2.47694	0.57384
			0.769461	2.15874	1.01679	0.359652	1.63448	0.233949	1.21002	0.465753
			1.08767	1.95125	1.43291	0.254779	1.19278	0.227022	1.89817	0.647887
			1.09357	1.45293	1.67316	0.340201	1.09637	0.206441	1.4552	0.408585
			0.871489	2.14644	2.07207	0.328657	1.29469	0.267836	1.555	0.615385
			1.28259	2.43885	1.2935	0.35058	1.04252	0.237949	2.03604	0.462523
			0.885057	1.99798	1.16021	0.247991	1.27293	0.169042	1.49925	0.375246
			0.970379	2.42255	2.8704	0.255263	1.25103	0.215237	1.37282	0.593176
			1.17861	1.60779	1.08333	0.241716	1.1023	0.160423	0.701361	0.539964
			0.802974	2.02376	1.36567	0.279752	1.02367	0.163845	0.721565	0.58467
			0.841727	2.11917	1.04233	0.336763	1.17751	0.19795	0.882525	0.438224
			1.01787	1.86085	1.48607	0.321523	1.21916	0.217443	0.842972	0.417457
			0.976139	3.09107	1.17091	0.335669	1.13262	0.180952	0.774917	0.597496
			1.09452	1.76939	1.6846	0.326502	1.39928	0.18161	0.923077	0.612546
			1.035	1.80869	1.64174	0.315223	1.11475	0.262852	0.78732	0.425497
			1.04148	1.94644	1.68682	1.84049	1.08175	0.194842	0.869117	0.703565
			0.746988	2.39783	0.817803	1.76644	1.38216	0.227988	1.28561	0.611785
			1.22959	2.85659	1.75559	1.89944	1.15066	0.163478	0.675981	0.701783
			1.1675	2.54092	1.3976	1.93029	1.25586	0.2175	0.751621	0.557664
			1.0217	1.77333	1.22866	1.85859	1.12896	0.178464	0.863214	0.866279
			1.01414	1.52003	1.29847	1.55737	1.2225	0.225131	0.818686	0.489209
			0.980704	1.51223	1.84091	3.29674	0.988253	0.242136	0.942375	0.753153
			0.897605	2.23772	1.93443	2.62862	1.1447	0.139167	0.657234	0.968401
			1.4	1.50266	1.61259	2.8621	1.27224	0.191704	0.904311	0.509404
			0.919149	2.06101	1.31025	2.89474	1.20745	0.181638	0.815357	0.531131
			0.986318	1.46459	1.03821	2.17422	1.11508	0.193966	0.897663	0.607073
			0.961252	2.3668	1.62892	1.90744	1.18313	0.174739	0.791536	0.589226
			1.05004	2.42407	1.77788	1.8129	0.973743	0.186104	0.904087	0.548883
			0.910881	2.17453	1.01959	1.94411	1.00487	0.218026	0.876502	0.548463
			1.13161	2.18586	1.06977	1.84428	1.12155	0.165501	1.04013	0.472356
			0.954059	0.920322	1.38027	1.81808	1.05963	0.197321	0.721131	0.378752
			1.02653	1.90404	1.43112	1.92284	1.14492	0.24942	0.93537	0.438495
			0.780942	2.17558	0.94948	2.38272	1.20324	0.24053	0.80619	0.47365
			1.11625	2.16471	1.38718	1.92791	1.22712	0.217546	1.20289	0.689922
			1.05592	2.72451	1.35125	2.71818	1.26908	0.216941	1.01658	0.557608
			0.864495	2.61776	2.27236	1.49427	1.11429	0.22372	1.02737	0.509184
			0.849711	1.71757	0.950476	1.72574	1.4107	0.250149	0.867421	0.519912
			1.23964	1.30241	1.40989	2.37889	1.06583	0.174632	0.968224	0.870031
			0.65668	2.48288	1.16716	1.85847	1.29255	0.256937	1.04925	0.538198
			1.01358	1.31061	0.969986	1.69326	0.813688	0.207097	1.06269	0.219224
			0.82543	1.97416	1.45711	1.72856	1.31815	0.229535	1.14915	0.448918
			1.24495	2.34083	1.66069	2.14178	1.02382	0.153979	1.10166	0.19929
			0.961838	1.70894	1.15742	1.76119	1.14325	0.196911	0.980227	0.274046
			0.96628	1.96623	1.08916	2.29984	1.77466	0.195313	1.10629	0.288554
			0.941229	2.24009	1.26486	1.69183	1.34391	0.185374	0.84847	0.380165
			0.995823	2.32558	1.00902	1.59576	1.38889	0.205562	0.836201	0.287671
			0.693927	1.57683	1.11888	1.90341	1.51563	0.181872	1.00785	0.294498
			1.14087	2.58128	1.79948	2.08623	0.99195	0.228333	1.00128	0.596195
			1.20259	1.72682	1.16013	1.72186	1.44428	0.170557	1.04643	0.362306
			1.35796	2.40229	0.979671	1.80085	1.10419	0.237384	0.960621	0.333333
			1.42934	2.55277	1.15078	2.75383	1.09495	0.233959	1.0314	0.32381
			1.2608	2.53892	0.955671	1.46588	1.55738	0.215541	1.01075	0.476218
			1.45697	2.85293	1.25608	1.68718	2.51359	0.203125	1.01944	0.252322
			1.55061	1.56889	1.10889	1.769	2.17302	0.548148	0.864868	0.298984
			1.45128	2.29739	1.47559	1.48651	3.42418	0.767349	1.09287	0.301266
			1.49428	3.01429	0.856081	1.69718	1.87971	0.715652	0.95216	0.285815
			1.30765	1.52272	0.97831	1.99653	2.10098	0.598653	0.991328	0.23504
			1.45592	1.51149	1.12543	1.86639	3.24957	0.730539	1.04465	0.22815
			0.872353	1.49985	1.283	1.75613	1.60134	0.857964	0.977237	0.377413
			1.46696	1.66876	1.33444	1.71316	1.85954	0.768041	1.02028	0.3712
			0.922509	1.61109	1.12568	1.69271	2.02239	0.495402	1.03885	0.305577
			1.37409	1.40049	1.44493	1.59021	1.3065	0.826453	0.924834	0.492928
			1.18538	1.57736	0.996193	1.46273	3.37883	0.670723	0.928554	0.361111
			1.42013	1.96532	1.07851	1.36475	1.71938	0.890517	1.15585	0.345364
			1.22701	1.55429	1.01223	1.8099	1.93789	0.706	1.23026	0.325314
			1.39089	1.57033	0.768506	1.90839	1.42581	0.732545	1.30463	0.319334
			1.30974	1.65649	1.07081	1.73457	1.51298	0.564767	1.96183	0.250281
			0.914409	1.4432	1.27078	1.51647	1.87212	0.917363	1.57717	0.271472
			1.39429	1.64876	1.62037	1.82318	1.60865	0.814994	1.91447	0.286533
			1.14445	1.36583	1.3714	1.89555	1.80861	0.842043	1.18863	0.334311
			1.02499	1.86718	1.14657	1.35164	1.64976	0.570858	1.13842	0.291157
			1.17714	1.5586	1.06826	1.22623	1.71235	0.756776	1.78934	0.32757
			1.46831	1.53146	1.01218	1.64447	1.58574	0.79659	1.73589	0.299656
			1.41077	1.9347	1.1257	1.33904	3.02998	0.780721	1.54385	0.34224
			1.35141	1.63739	0.96181	1.628	2.086	0.633242	2.08395	0.280282
			1.17884	1.76005	0.977327	1.02414	2.46002	1.27079	1.30054	0.22284
			1.32213	2.15898	0.852476	1.35398	2.10247	0.612203	1.42212	0.26557
			1.5187	1.70554	1.04655	1.7029	3.22981	0.735987	0.926497	0.174365
			1.45615	1.72925	0.893557	1.76107	1.89322	0.670543	1.775	0.273832
			1.7026	1.38441	1.08227	1.91687	1.78243	0.718296	1.32511	0.258768
			2.30792	1.41814	0.993338	1.85658	1.83028	0.65415	1.27905	0.187201
			1.73192	1.78065	0.976619	1.54331	1.79491	0.845383	1.2671	0.286458
			1.81567	2.22797	1.05049	1.45934	1.7875	0.617617	1.41234	0.300481
			2.5025	1.68993	0.958258	1.41199	1.75996	0.927363	1.55292	0.455882
			1.81472	1.60592	1.01473	1.83567	0.838718	0.574022	1.69019	0.324372
			1.65332	1.5308	1.92975	1.88111	0.909592	0.816197	1.88189	0.281088
			1.88744	1.60364	2.31575	2.02342	0.523297	0.820762	2.03698	0.338736
			2.22134	1.80014	1.87944	1.49018	0.625995	0.704762	1.934	0.356011
			2.39479	1.83886	2.34265	1.90736	0.889364	0.727038	1.94319	0.374705
			2.67125	1.83822	2.32491	1.91632	0.712446	0.822208	1.63736	0.388025
			2.16389	1.46816	2.03026	1.64282	0.739645	0.683665	1.62199	0.376117
			1.99798	1.42799	2.30367	2.07194	1.05556	0.780044	1.78188	0.316108
			1.89844	1.36862	2.22492	1.59593	0.425576	0.71411	2.05987	0.436108
			2.2083	1.49576	2.52431	1.6129	0.652094	0.645603	1.6072	0.349531
			2.21044	1.52235	1.99312	1.8323	0.648746	0.629934	2.1173	0.400772
			2.30677	1.44948	1.8264	2.14037	0.708443	0.662278	2.00052	0.270954
			1.88779	1.46694	1.86319	1.37491	1.05872	0.47619	1.58047	0.33625
			2.28774	1.42154	1.77562	1.64005	0.93305	0.70109	1.55285	0.320095
			2.18879	1.36661	2.19082	1.84215	0.548399	0.645408	2.19879	0.320686
			3.33647	1.40025	2.10035	1.55523	1.06539	0.475366	2.1172	0.290471
			2.20083	1.47812	1.95181	1.61922	0.834104	0.636774	1.65014	0.328724
			2.07944	1.52664	2.38739	2.14945	0.470775	0.744782	1.98852	0.42236
			1.43426	2.8743	1.4921	1.66247	1.21689	0.697303	2.02106	0.342925
			1.34882	2.85984	1.2318	1.7123	0.529289	0.587541	1.64006	0.280102
			1.44521	1.77549	1.70855	1.81845	0.658816	0.671627	1.43649	0.394015
			1.44459	2.51977	2.35434	1.5626	0.628646	0.64974	1.53327	0.366251
			1.38849	2.37721	1.99051	0.233508	0.79589	0.562044	1.39618	0.272516
			1.48735	2.38287	1.53913	0.322344	1.28099	0.746046	1.25931	0.325593
			1.59478	2.9543	1.66	0.317658	0.81228	0.671622	1.38937	0.375295
			1.62435	2.48295	2.43541	0.386189	0.593015	0.727361	1.39774	0.312142
			1.47448	3.39392	1.85065	0.352962	0.662543	0.77072	1.29563	0.263448
			2.01718	2.78718	1.75508	0.323715	0.483259	0.509083	1.43779	0.315947
			1.92922	2.14767	1.89568	0.29153	0.851981	0.730535	1.36476	0.709001
			1.31146	2.32295	2.19964	0.63326	0.821409	0.677072	1.2239	0.704415
			1.42878	2.86493	1.73513	1.18562	0.707268	0.43241	1.35181	0.589565
			1.61624	2.95769	1.45369	0.639566	1.0386	0.677125	1.31707	0.802947
			1.84624	2.29734	1.65257	0.708835	1.18829	0.662817	1.28514	0.725217
			1.62395	2.69882	1.54596	0.717718	0.593255	0.369863	1.44062	0.949324
			1.24627	2.4824	1.68646	0.710489	0.589777	0.59322	1.12676	0.566077
			1.6375	2.91905	1.87017	0.716418	0.497884	0.630614	1.29318	0.772506
			1.72068	2.12513	1.30884	0.841044	0.721239	0.627794	1.38446	0.891239
			2.05793	2.41518	2.06021	0.989305	0.975866	0.458494	1.25854	0.676548
			1.4848	2.7531	1.71804	0.906883	0.845139	0.209756	1.15305	0.780822
			1.42606	2.5642	2.54336	0.811576	0.79172	0.640075	1.31895	0.839641
			1.10807	2.78562	1.57976	0.80831	0.613208	1.615	1.11864	0.808976
			1.36804	2.49541	2.05544	0.668571	0.76404	1.99619	2.3696	0.794872
			1.58397	3.55493	1.57274	0.963001	0.546453	1.83531	1.53292	0.873016
			1.53382	2.69515	2.30944	0.837522	1.10255	2.15345	1.71445	0.628486
			1.19848	2.13355	2.55844	0.649584	0.774898	2.00712	1.21452	0.787611
			1.2322	2.07241	1.42308	0.824111	0.830145	2.01349	2.03891	1
			1.43981	2.21905	2.09868	1.09454	0.582932	2.33333	1.37917	1.03717
			1.39181	2.92815	1.72861	0.895876	0.467143	1.94223	1.13433	0.669565
			1.73042	3.22194	2.53744	1.13057	0.694933	2.25259	1.3659	0.741158
			1.21877	2.1537	1.68107	0.720192	0.749625	2.27009	1.26995	0.727975
			1.49208	2.02926	2.0234	0.840035	0.81427	1.58	1.68377	0.761046
			1.43929	2.3527	1.97048	0.752399	0.416609	1.9202	1.58286	0.635546
			1.9648	1.53568	2.16549	0.74918	0.392024	2.01071	1.36197	0.628272
			1.71492	1.73173	1.57071	1.00173	0.330486	2.06289	1.22591	0.815889
			1.89421	1.17944	2.07496	0.765533	0.303763	1.96405	1.07157	0.607891
			1.80733	1.71596	1.7071	0.751067	0.32649	2.28169	1.18668	0.970486
			1.65651	1.26619	2.23024	0.801752	0.314094	1.85791	1.26921	0.869072
			2.30569	1.7947	2.63905	0.709316	0.280366	2.13636	1.48798	1.02397
			1.68969	1.37692	2.20853	0.810957	0.314815	1.84756	1.28227	0.74
			1.86771	1.39047	2.14147	0.739257	0.232101	1.75	1.2572	0.965251
			1.75867	1.17091	1.05388	0.689041	0.348504	1.78775	1.54613	0.769376
			1.75426	1.67722	1.33333	0.810643	0.223162	1.64346	1.19209	0.763271
			2.00216	1.3721	1.20454	0.625	0.230804	2.16225	1.52342	0.669986
			1.77698	1.81965	1.60491	0.661538	0.320609	2.37961	1.48562	0.803853
			1.47063	1.38552	1.19864	0.705307	0.230442	2.02494	1.36261	0.49349
			1.7981	1.55008	1.25166	0.73122	0.274506	1.32826	1.72232	0.742081
			1.64732	1.94621	1.22029	0.719231	0.207071	1.78025	1.35879	0.698795
			1.56458	1.8818	1.29117	1.17655	0.235805	1.84541	1.14493	1.12417
			2.03746	2.12741	1.34143	0.783784	0.290165	1.62521	1.26096	0.68625
			1.89039	1.41185	1.52719	0.726542	0.306735	1.82153	1.16851	0.61831
			1.97602	1.77014	1.60483	0.673956	0.213773	2.17126	1.24664	0.795129
			1.87441	1.71149	1.93461	0.915323	0.377065	1.62974	1.26987	0.469091
			1.93898	1.77858	1.10926	0.757576	0.1395	1.89067	1.29787	0.813433
			1.61323	1.49954	1.44392	0.432635	0.181687	1.9689	1.13877	1.02632
			1.66165	1.67454	1.6483	0.67439	0.332143	1.65376	1.38038	1
			1.98764	2.12264	1.3151	0.757985	0.242372	1.68575	1.22684	0.839363
			1.68372	1.71529	2.13528	0.551669	0.285203	1.86076	1.35857	0.768953
			2.22239	1.92252	1.84839	0.730392	0.420526	1.76485	1.91401	0.608061
			2.06967	1.67929	1.23649	0.618321	0.280079	2.18588	1.35884	0.798165
			1.791	1.81318	1.16601	0.926327	0.243961	1.71087	1.28344	1.04012
			1.89242	2.47833	2.42963	0.810282	0.222163	1.8779	1.18149	0.825926
			1.8563	2.23436	1.39495	0.707535	0.280527	1.67574	1.21732	0.949519
			1.94796	1.82726	1.12089	0.519836	0.216903	1.41479	1.35667	0.855528
			1.6513	1.84231	1.62859	0.580533	0.193897	2.17732	1.26521	0.645293
			1.63722	1.70526	1.6216	0.650602	0.238046	1.86042	1.63512	1.23804
			1.83478	1.70869	1.63366	0.517919	0.219323	1.40855	1.71075	1.38477
			1.89059	2.09607	1.49164	0.70697	0.248575	0.455227	1.36818	1.04618
			1.85541	2.20219	1.68606	0.614951	0.30303	0.538581	1.31373	1.48027
			2.00685	1.44357	1.5694	0.779352	0.25689	0.50861	1.39705	1.1489
			2.00282	1.89847	1.92898	0.632948	0.272235	0.576228	1.20662	1.32235
			1.93944	2.35384	1.65804	0.598456	0.308874	0.540179	1.32742	1.10911
			2.23534	1.63425	1.74127	0.688679	0.29536	0.456878	1.44067	1.16488
			1.89546	1.65358	1.41945	0.671271	0.206171	0.501615	1.66599	1.37795
			1.97576	2.64	1.6732	0.444604	0.273903	0.39265	1.24957	1.39604
			1.89264	1.51087	1.59976	0.670009	0.246471	0.576286	1.34463	1.4233
			1.85729	1.53573	2.08592	0.608277	0.33624	0.590674	1.36299	0.967033
			2.21679	1.85657	1.54597	0.750936	0.381095	0.480082	1.49977	1.29346
			2.06903	1.57864	1.34397	0.25817	0.380478	0.56574	1.36066	1.23429
			1.84253	2.55378	1.85054	0.702934	0.256106	0.50251	1.43925	1.18546
			2.1597	2.72352	1.5311	0.631336	0.386867	0.506912	1.64413	1.6382
			1.95386	3.50324	1.60138	0.562857	0.397356	0.550635	1.33522	1.18168
			2.33858	2.69462	1.87492	0.540541	0.352371	0.518824	1.49217	1.32995
			1.7779	3.67826	1.5814	0.757123	0.42659	0.569471	1.72781	1.17544
			1.44284	3.65045	1.27742	0.723537	0.400113	0.53153	1.17166	1.07459
			1.71047	3.40683	1.2399	0.609155	0.317429	0.555364	1.35424	1.02923
			2.03861	3.46697	1.27561	0.78441	0.434365	0.561065	1.45298	1.2087
			1.79706	2.9803	1.2874	0.60356	0.468111	0.524096	1.18744	1.02941
			1.50965	3.41524	1.43962	0.658717	0.333888	0.558182	0.984405	1.05298
			2.65591	3.37833	1.27526	0.834805	0.348162	0.52983	1.10173	1.22472
			2.08033	3.51901	1.45484	0.613847	0.398033	0.537711	1.06238	1.16999
			2.09265	2.92127	1.88381	0.507622	0.36074	0.570445	1.35411	0.993304
			1.68456	3.47013	1.33256	0.625119	0.346458	0.50118	1.93199	1.10657
			1.61933	3.1036	1.41183	0.748266	1.99215	0.663678	1.16018	1.02603
			1.89412	2.77046	2.07397	0.793801	1.68066	0.526295	2.47694	1.04742
			1.3597	2.43319	1.57022	0.394904	2.21875	0.520191	1.21002	1.05445
			2.36477	2.71488	2.26639	0.658774	2.45868	0.45383	1.89817	1.07837
			1.80665	1.54328	1.4841	0.568869	2.07186	0.567155	1.4552	1.1645
			2.06844	1.96863	1.22988	0.770179	2.47249	0.490796	1.555	1.2155
			1.94186	2.41303	1.3164	0.630046	1.16129	0.432974	2.03604	0.964286
			2.34195	1.87069	1.13433	0.767764	1.99604	0.558358	1.49925	1.02206
			2.54768	1.8225	3.3659	0.587571	2.42251	0.486454	1.84049	0.931604
			2.5464	2.25456	1.26995	0.658537	2.00285	0.441957	1.76644	1.43794
			2.74132	2.33	1.68377	0.663206	1.79872	0.466093	1.89944	1.23771
			2.37809	1.8268	2.58286	0.564286	2.07476	0.509802	1.93029	1.07762
			3.50059	2.07356	1.36197	0.656164	2.17904	0.474062	1.85859	1.21856
			1.87538	2.04305	1.22591	0.622196	1.96164	0.479167	1.55737	0.977578
			2.00908	1.95846	2.07157	0.7125	2.6783	0.472315	3.29674	1.17521
			1.98326	2.15855	1.18668	0.828911	3.55597	0.497893	2.62862	1.12881
			2.04463	2.46723	1.26921	0.883243	2.23372	0.551053	2.8621	1.31294
			2.11641	2.25583	1.48798	0.799167	1.97421	0.480477	2.89474	1.28289
			2.48629	1.40263	1.28227	0.866667	1.69565	0.432718	2.17422	1.45894
			2.50397	1.69722	1.2572	0.694231	2.39702	0.446208	1.90744	1.1596
			2.56569	1.57774	1.54613	0.833512	2.09867	0.502603	1.8129	1.3617
			2.39905	1.77937	1.19209	0.887943	2.32756	0.480004	1.94411	1.0339
			2.13039	1.83898	1.52342	0.824201	2.3031	0.541788	1.84428	0.939326
			2.35704	2.07603	1.48562	0.600707	1.59434	0.436975	1.81808	1.83186
			2.50202	2.14405	1.36261	0.950055	2.30743	0.465244	1.92284	1.173
			2.03451	2.62254	1.72232	0.545525	2.08546	0.64922	2.38272	1.06689
			1.99417	1.74572	1.35879	0.808889	1.64384	0.525989	1.92791	1.23711
			1.58889	2.60794	1.14493	0.758645	1.73842	0.480943	2.71818	1.19861
			1.70532	2.13681	1.26096	0.777193	1.7648	0.465189	1.49427	1.04519
			1.73621	2.02108	1.16851	0.796058	2.0117	0.473684	1.72574	1.12041
			1.73298	3.16638	1.24664	0.786846	2.0613	0.396822	2.37889	1.14935
			1.72621	3.17019	1.26987	0.717865	1.97644	0.491541	1.85847	1.24917
			2.61242	2.46741	1.29787	0.903992	1.0974	0.457239	1.69326	1.34978
			2.53555	2.32055	1.13877	0.822109	1.77738	0.42199	1.72856	1.06604
			2.23014	2.67661	1.38038	0.937719	1.6887	0.4514	2.14178	1.26767
			2.53236	2.69389	1.22684	0.678019	1.90088	0.515924	1.76119	1.11706
			1.44218	3.09575	1.35857	0.989767	1.67485	1.02914	2.29984	1.16514
			1.7693	2.34618	1.91401	0.596618	1.14144	0.804945	1.69183	1.36155
			2.03751	2.47173	1.35884	0.63783	1.56625	0.709951	1.59576	1.42256
			2.15464	2.40848	1.28344	0.85696	1.63315	0.868766	1.90341	1.1743
			2.6422	2.92617	1.18149	0.882407	1.9	0.925397	2.08623	1.01531
			2.35651	2.71052	1.21732	0.666244	1.98745	0.963636	1.72186	1.51048
			2.41961	3.03387	1.35667	0.776997	1.92897	0.904	1.80085	1.11005
			2.04205	2.47085	1.26521	0.815562	1.5873	1.15811	2.75383	1.24294
			2.92136	2.65112	1.63512	0.558176	1.71429	0.852825	1.46588	1.1909
			2.29486	2.55819	1.71075	0.655738	1.14286	0.93265	1.68718	1.33333
			2.42914	2.91725	1.36818	0.722667	1.44281	1.10714	1.769	1.36323
			2.61208	2.4032	1.31373	0.765581	1.92208	0.880423	1.48651	1.06675
			2.18004	2.67221	1.39705	0.77018	1.50657	0.900188	1.69718	1.48131
			2.30485	3.71087	1.20662	0.711283	2.10086	0.65096	1.99653	1.42105
			2.66331	2.57422	1.32742	0.639394	1.5092	1.2748	1.86639	1.33693
			2.56815	3.00114	1.44067	1.23642	1.41801	0.851013	1.75613	1.30972
			2.14784	2.32632	1.66599	1.05395	2.30233	0.944535	1.71316	1.47203
			2.58864	2.67107	1.24957	0.801429	1.30045	1.07029	1.69271	1.33807
			2.00508	2.26347	1.34463	0.796754	1.93664	0.875688	1.59021	1.21411
			2.07512	2.91489	1.36299	0.931649	2.24927	0.850685	1.46273	1.33763
			2.16246	2.84532	1.49977	1.4463	1.7971	0.995066	1.36475	1.33296
			2.17958	2.12966	1.36066	1.05606	1.95627	1	1.8099	1.26743
			2.18839	2.28003	1.43925	0.823129	1.78333	1.07111	1.90839	1.27175
			2.96381	2.58512	1.64413	0.72879	2.26899	1.11435	1.73457	0.99
			1.86495	2.67466	1.33522	1.10863	1.85653	1.00651	1.51647	1.32444
			1.81988	2.31061	1.75552	1.55006	2.0504	0.935989	1.82318	1.22025
			2.7027	2.55954	1.76825	1.09596	1.37143	1.12725	1.89555	1.02347
			1.85064	2.51139	2.73154	0.256552	1.90741	0.974555	1.35164	1.16428
			1.88976	2.62816	2.62709	0.729072	2.0649	0.804598	1.22623	1.14121
			2.07157	2.43997	2.66962	0.756018	1.54546	0.800926	1.64447	1.0884
			1.89771	2.77199	1.76214	0.873659	1.7675	0.955275	1.33904	1.27065
			2.28641	2.56213	2.80205	1.24508	1.55128	0.845161		1.23067
			2.04392	3.25436	2.03807	0.814972	1.3539	1.03129		0.873033
			2.04556	3.90857	1.63233	0.844374	1.64425	1.17398		1.19333
			2.2491	2.23575	1.89508	1.06349	1.54497	0.997558		1.00571
			2.41734	3.74847	2.71827	0.826972	1.65689	0.933126		1.82079
			2.1967	2.37626	1.68723	0.92253	1.35168	1.24818		1.2837
			1.95437	2.84461	1.628	1.01957	1.35629	0.977591		1.30791
			1.89644	2.36203	1.02414	1.24855	1.49491	1.04882		1.31465
			1.86982	2.16775	1.35398	1.06645	1.49326	0.862656		1.33566
			1.9327	1.48039	1.7029	0.854139	1.3955	0.894049		1.47826
			1.67766	1.35581	1.76107	1.06477	1.56744	1.41333		1.45422
			1.93777	1.2548	1.91687	1.0566	1.22571	0.935143		1.01072
			1.19167	2.00919	1.85658	0.87156	1.13812	0.925859		1.35526
			1.30823	2.17912	1.54331	1.00734	1.23529	1.14023		1.3403
			1.32777	1.9491	1.45934	0.92053	1.3096	0.906137		1.28748
			1.14312	1.81788	1.41199	0.831307	1.41259	0.851852		1.55305
			1.18328	2.32975	1.83567	0.963279	1.51632	0.968268		1.37484
			1.36615	2.16378	1.88111	0.787045	1.56884	0.828402		1.36426
			1.12885	2.10944	2.02342	1.06735	1.48262	0.894668		1.5275
			1.18803	2.19475	1.49018	0.954819	1.4	0.962963		1.42193
			1.28125	1.96791	1.90736	0.981959	1.16959	0.930645		1.43268
			1.21905	1.83333	1.91632	0.884163	1.21849	0.883469		1.38072
			1.4	2.03914	1.64282	0.805699	1.1448	1.22648		1.40987
			1.49653	2.24	2.07194	0.872449	0.956072	0.856315		1.44608
			1.36326	1.78245	1.59593	0.987342	0.977199	0.955665		1.31325
			1.63194	1.98867	1.6129	0.947195	1.52236	1.46771		0.590909
			1.18461	2.20054	1.8323	0.886983	1.26212	1.33153		0.594643
			1.2087	1.67251	2.14037	0.752696	1.51931	0.845619		0.579972
			1.38583	1.99716	1.37491	1.03145	1.10625	0.968586		0.689769
			1.22758	2.42667	1.64005	0.799228	1.19973	0.831502		0.656947
			1.36662	1.70801	1.84215	0.964113	1.31049	0.924968		0.808929
			1.15205	1.99363	1.55523	0.973712	1.11864	0.855799		0.691589
			1.35986	1.91759	1.60134	0.750473	1.32102	1.1611		0.57622
			1.33665	1.94462	1.85954	0.916963	2.11156	0.688333		0.715421
			1.25	2.18133	2.02239	0.801127	1.3125	0.774709		0.632051
			1.25379	1.9427	1.3065	0.915694	1.2008	0.849216		0.602564
			1.81118	1.41595	3.37883	0.837148	1.44084	0.921011		0.592593
			2.69581	1.3857	1.71938	0.963912	1.54206	0.811957		0.732601
			1.79809	1.31208	1.93789	1.0552	1.17418	0.89781		0.759602
			1.19078	1.98712	1.42581	0.979344	1.33266	0.725589		0.502044
			1.25673	2.33648	1.51298	0.855128	1.42078	1.01809		0.546154
			1.30444	2.49631	1.87212	0.71093	0.928767	1.07274		0.544532
			1.17881	1.68823	1.60865	0.81128	1.30283	0.819265		0.486071
			1.15886	2.52833	1.80861	0.948375	1.41477	0.923005		0.61745
			1.37453	1.94093	1.64976	1.22802	1.05825	0.79285		0.527027
			1.27479	1.91627	1.71235	0.813582	1.33007	0.752308		0.533499
			1.56677	2.34502	1.58574	0.834448	1.04138	0.901639		0.785381
			2.01159	2.18286	3.02998	1.1	1.27673	1.06065		0.249605
			1.31619	1.94003	2.086	1.00831	1.4	0.830065		0.554307
			1.19727	2.73582	2.46002	0.904762	1.19516	1.0181		0.436893
			1.28545	2.0758	2.10247	0.758185	1.77667	0.901408		0.633508
			1.16841	2.04074	3.22981	0.813333	1.32551	1.7365		0.735974
			1.29205	2.12862	1.89322	1.11357	1.5	1.56923		1.63885
			1.39539	2.14316	1.78243	1.04986	1.11927	1.5		1.35993
			1.30529	1.72199	2.09768	1.38505	1.28387	1.42732		1.34112
			1.15702	2.23224	2.62807	0.741252	1.20968	1.14139		2.09005
			1.29808	2.11744	3.22143	0.817958	1.1935	1.65734		1.55365
			1.10325	2.17824	2.65589	0.873587	0.986333	1.11453		1.12549
			1.6147	2	1.61873	0.95904	0.921311	1.25105		1.28744
			1.20156	1.7963	2.28824	0.973872	0.771978	1.50585		1.59079
			1.17537	3.5887	0.715929	0.884868	1.07431	1.48597		1.36213
			1.80608	3.66109	1.0004	0.905028	1.51587	1.70652		1.91693
			1.39967	3.42546	0.897871	1.06667	1.01482	1.64115		1.31185
			2.02635	1.28309	0.775328	0.863354	0.933333	1.24513		2.02029
			2.56002	1.11277	0.931153	0.762675	1.86746	1.495		1.6411
			1.70732	1.53761	0.728663	1.00863	1.93515	1.56194		1.46872
			1.77231	1.18221	0.959142	0.765258	2.24203	1.15637		1.27223
			2.12299	1.33406	0.675365	1.12121	2.49166	1.31515		1.75871
			2.78184	1.21653	0.69311	0.798958	1.20327	1.48426		1.38826
			2.66395	1.38698	1.15619	0.720401	1.06695	1.98551		2.44993
			1.6464	1.20195	2.62598	0.932367	0.968511	1.87042		1.43822
			1.13254	2.19115	1.73033	0.786946	1.05901	2.23355		1.87845
			1.37335	2.54206	2.87857	0.842814	0.882756	2.11993		1.42623
			1.16312	2.00342	1.88849	1.29063	1.09309	1.453		1.43664
			1.22159	2.0303	0.986786	1.00734	1.26228	1.41745		1.7694
			1.5808	2.18823	1.71618	0.799593	0.890732	1.61194		1.36662
			1.1955	2.32942	0.78023	0.787183	1.0044	1.49775		1.68119
			1.39292	2.61469	2.53279	0.752085	1.04378	1.71268		1.34061
			1.18503	2.2422	1.24143	0.845201	0.880135	1.38718		1.77987
			1.29779	3.32662	1.04843	0.465461	0.922994	1.51955		1.8501
			0.717084	3.5505	0.996226	0.43497	0.989476	2.41494		1.68592
			0.8089	3.93764	0.836222	0.427593	0.961188	1.58625		1.79204
			0.890765	3.86705	0.620272	0.341378	1.07754	1.3667		1.73198
			1.83641	5.25339	0.91842	0.380673	0.99274	1.3653		1.57859
			1.8984	4.90745	0.800306	0.344574	0.704675	1.78541		0.789326
			1.99785	4.22984	1.14504	0.274682	0.898464	2.16049		0.582005
			2.12679	3.53482	0.759697	0.471334	0.875375	1.87067		0.424423
			1.89823	4.33034	0.901181	0.443139	0.775488	1.69224		0.178941
			1.81786	2.48095	2.00889	0.37863	0.831169	2.22139		0.411026
			1.9375	4.295	1.8165	0.358235	0.806132	1.33974		0.33531
			2.34627	3.8686	1.18799	0.350082	0.802367	1.72684		0.484551
			2.48718	3.19954	1.27421	0.286452	0.745272	1.58186		0.23166
			2.45558	5.29425	2.48681	0.34689	0.787619	1.7543		0.295924
			2.21528	3.095	1.87029	0.501985	0.966829	2.09699		0.311991
			2.57732	4.82076	1.88825	0.318452	0.743719	1.58437		0.378769
			2.1853	4.25635	0.545776	0.348727	1.03333	1.52214		0.358877
			1.59837	4.52163	0.962336	0.313529	0.824047	1.59858		0.270157
			1.53967	4.63889	0.784654	0.410339	0.763231	1.63434		0.345714
			1.96282	5.26506	0.951396	0.404342	1.07367	1.41632		0.477961
			1.97447	3.08884	0.914351	0.282862	0.935791	1.69732		0.203125
			1.55801	4.41936	1.10238	1.01048	0.668806	2.17647		0.358031
			1.95691	3.72093	0.911949	1.18947	0.819106	1.62659		0.241741
			1.63636	3.73036	0.871168	1.17427	0.758767	1.60066		0.173667
				2.93598	0.955085	1.13397	0.739869	1.51975		0.207504
				3.30993	0.777239	1.22232	0.687805	1.94719		0.299137
				4.11975	1.04831	1.21592	0.834606	1.41966		0.391384
				4.52654	1.08471	1.19931	0.879365	1.75301		0.242762
				5.38608	1.0336	2.15426	0.758028	2		0.358912
				4.2963	0.715724	1.23945	1.01376	1.82815		0.220207
				3.64078	0.889536	1.67361	0.642582	2.2393		0.453171
				1.845	1.13487	1.12923	0.893639	1.81992		0.225094
				4.16667	0.710134	1.18796	0.877761	1.46914		0.258811
				4.71174	0.969174	1.81301	0.722267	1.78777		0.337527
				5.97517	0.772335	1.55511	0.846266	1.80162		0.310519
				5.08102	0.644634	1.10106	0.696884	1.71056		0.386711
				4.37363	0.618202	1.17893	0.781369	1.55495		0.275576
				3.61211	0.836356	1.84049	0.658993	1.51552		0.256327
				3.42661	0.839413	1.76644	0.867277	1.43419		0.317566
				5.66443	0.985942	1.89944	0.834184	1.28571		0.447115
				4.02505	1.01798	1.93029	0.934307	1.86224		0.480703
				5.57788	1.01751	1.85859	0.737835	1.18629		0.320616
				3.90217	0.793314	1.55737	0.794661	1.7659		0.316574
				3.74201	0.817709	1.68718	0.823293	1.5649		0.3349
				3.43541	0.747083	1.769	0.690616	1.22268		0.306716
				4.28598	1.11799	1.48651	1.02314	1.10422		0.268116
				4.42553	0.957038	1.69718	0.777114	1.631		0.388505
				2.16558	0.802804	1.99653	0.751034	1.63956		0.344167
				2.07417	0.820825	1.86639	0.902362	1.78337		0.399457
				1.98714	1.21912	1.75613	0.769841	1.5747		0.321326
				3.04289	1.12317	1.71316	0.809484	2.02597		0.352397
				1.91448	2.09768	1.69271	0.736602	1.99112		0.327048
				2.40742	2.62807	1.59021	0.97474	1.84521		0.409091
				2.72818	3.22143	1.46273	1.02737	1.78333		0.302503
				2.27843	2.65589	1.36475	0.864975	1.96752		0.227402
				2.21979	1.61873	1.8099	0.694421	2.7234		0.401382
				2.13053	2.28824	1.90839	1.30894	1.98131		0.26136
				2.14292	2.07293	1.73457	0.632159	1.8703		0.430627
				1.91791	1.55443	1.51647		2.16112		0.391393
				2.09041	2.57047	1.82318		1.83137		0.326193
				2.26708		1.89555		1.7532		0.338384
				2.03317		1.35164		1.7167		0.47646
				1.86871		1.22623		1.76978		0.51871
				1.88117		1.64447		1.73918		0.433467
				1.92124		1.33904		1.868		0.56707
				2.15968		1.628		1.86337		0.464977
				2.12352		1.02414		1.99601		0.384177
				2.39225		1.35398		1.91593		0.499635
				1.91577		1.7029		2.36333		0.562921
				1.75724		1.76107		2.51451		0.410047
				2.31377		1.91687		1.7363		0.287547
				1.84453		1.85658		1.90012		0.376404
				1.7664		1.54331		1.79		0.248532
				1.77451		1.45934		2.61803
				1.68458		1.41199		2.30068
				1.87875		1.83567		2.3273
				1.77773		1.88111		2.09724
				1.75296		2.02342		2.23433
				2.1902		1.49018		2.22261
				2.07878		1.90736		2.82676
				2.0821				2.39293
				4.01027				2.95276
				2.94199				1.91975
				3.86828				2.47634
				3.55735				2.01931
				3.11444				2.6087
				3.32978				2.3821
				3.40175				2.10913
				3.26446				2.1003
				3.84215				2.17967
				3.28629				2.49077
				4.18956				0.842626
				2.77582				2.18929
				3.82808				1.14114
				3.17409				2.42645
				3.05813				2.66252
				3.71452				2.20478
				3.33168				1.93798
				3.04272				1.39697
				3.03524				1.1637
				3.28976				0.449895
				3.84027				0.525512
				4.09761				0.641186
				3.16691				0.576823
				3.6786				0.559021
				3.54559				0.872203
				3.00861				0.705638
				3.36475				0.550544
				2.87275				0.625
				3.79323				0.526166
				2.96901				0.539192
				3.68764				0.52123
				3.10929				0.579598
				3.10855				0.583155
				3.81465				0.702462
				3.55246				0.565208
				3.14346				0.619543
				3.33172				0.683633
				2.56088				0.6844
				3.34486				0.527448
				2.99023				0.607228
				3.68996				0.553668
				3.28688				0.632338
				2.59278				0.87461
				4.30427				0.849699
				3.22142				0.786221
				3.359				0.704225
				2.66997				0.679144
				3.81852				0.626972
				3.11998				0.6007
				3.85314				0.712616
				2.50257				0.596112
				3.35691				0.647796
				3.14491				0.682942
				3.70497				0.751501
				3.69041				0.619128
				3.1774				0.629358
				4.05263				0.712644
				3.30999				0.730741
				3.99257				0.818783
				3.83243				0.649003
				2.62003				0.709904
				3.53463				0.56716
				3.66911				0.67776
				3.99313				0.683966
				2.09441				0.671379
				3.43561				0.623766
				3.22926				0.570723
				1.82432				0.633634
				2.27869				0.823548
				2.21073				0.725169
				2.40244				0.63303
				2.70729				0.679688
				2.09351				0.674988
				1.96916				0.673401
				3.36021				0.615656
				3.09434				0.581341
				2.65623				0.657067
				3.66667				0.672258
				4.23178				0.68909
								0.535714
								0.607798
								0.715465
								0.787835
								0.574244
								0.814624
								0.617358
								0.572616
								0.59651
								0.585421
								0.626812
								0.774648
								0.788922
								1.05654
								0.235
								0.367637
								0.354011
								0.332239
								0.434255
								0.521104
								0.42505
								0.383491
								0.608752
								0.563887
								0.450883
								0.454545
								0.408691
								0.418866
								0.370532
								0.443535
								0.466435
								0.440476
								0.364299
								0.303107
								0.351184
								0.390421
								0.605338
								0.479412
								0.386161
								0.450846
								0.390045
								0.540775
								0.397112
								0.511584
								0.348091
								0.500271
								0.423478
								0.545524
								0.460543
								0.368404
								0.406699
								0.419589
								0.474903
								0.460048
								0.353357
								0.547993
								0.538182
								0.33418
								0.536806
								0.563939
								0.331096
								0.517763
								0.506158
								0.380805
								0.553114
								0.471051
								0.544244
								0.974314
								0.673934
								0.525956
								0.545609
								0.405405
								1.00794
								0.517297
								0.523472
								0.576522
								0.51987
								0.598586
								0.759709
								0.389772
								0.727983
								0.733995
								0.549534
								0.574014
								0.609711
								0.566479
								0.406583
								0.96618
								0.612705
								0.410542
								0.488748
								0.512571
								0.461245
								0.506452
								0.695167
								0.411147
								0.546296
								0.478384
								0.684116
								0.854355
								0.52409
								1.03815
								0.348631
								0.67418
								0.46238
								0.445058
								0.516784
								0.49843
								0.34398
								0.433404
								0.399274
								0.405243
								0.369752
								0.395604
								0.404702
								0.278002

## Sheet: Figure 7M-eat-2;pha-4
		eat-2;pha-4RNAi vs eat-2
	lysosomal genes	relative mRNA level of lysosomal genes			Mean	SD
	lmp-2	1.68298	1.4848	1.89584	1.68787	0.205564
	slc-36.2	1.52061	2.8294	1.09328	1.81443	0.904585
	ncr-1	0.665212	2.97914	1.98838	1.87758	1.16094
	vha-2	0.197218	0.373959	0.391108	0.320762	0.107335
	vha-3	0.871782	1.97483	1.83815	1.56159	0.601287
	vha-4	0.112115	0.154365	0.746266	0.337582	0.354561
	vha-6	0.586184	0.619178	0.866776	0.690713	0.153365
	vha-19	0.352454	0.843328	0.629778	0.60852	0.246126
	vha-8	0.246421	0.455327	0.837364	0.513037	0.299669
	vha-12	0.412922	0.669246	0.209692	0.43062	0.230288
	vha-15	1.85981	0.790352	0.164236	0.938132	0.857391
	Y105E8B.9	2.25227	0.29663	5.05855	2.53581	2.39359
	pho-1	0.356588	0.377504	0.728481	0.487524	0.208936
	lipl-7	2.06132	3.70227	1.46108	2.40822	1.16017
	The numerical data are analyzed by GraphPad Prism 6 and represented as a bar graph in Figure 7M.

## Sheet: Figure 7R-pHtomato
		Average intensity of pHtomato
		control RNAi		pha-4 RNAi
		WT	eat-2	WT	eat-2
		63.85	46.34	83.97	23.06
		48.13	18.59	83.12	27.38
		54.96	19.41	104.38	24.52
		46.53	16.17	82.82	41.9		The numerical data are analyzed by GraphPad Prism 6 and represented as a bar graph in Figure 7R.
		48.38	18.5	117	20.71
		59.27	54.39	99.18	28.76
		73.74	16.9	102.68	37.41
		59.56	22.23	125.96	20.83
		37.92	25.54	78	20.62
		66.72	15.4	105.12	34.58
		69.03	20.4	135.02	20.94
		43.62	24.71	123.63	37.97
		89.52	15.42	151.65	19.66
		47.68	17.97	118.39	36.81
		83.1	24.76	154.17	28.49
		51.86	22.36	143.31	29.7
		48.37	28.1	122.89	31.9
		48.33	25.19	88.26	26.25
		41.32	18.25	92.09	22.25
		50.56	24.06	92.89	22.7
		42.08	18.47	134.21	29.98
		45.5	28.9	110.29	23.69
		69.15	24.63	122.78	19.88
		122.73	17.55	151.4	23.2
		42.17	20.71	99.79	12.27
		71.82	22.04	122.75	11.51
		52.15	16.12	178.6	10.79
		77.22	17.19	137.26	7.77
		77.16	15.83	90.94	8.07
		37.7	22.93	118.55	9.46
		54.04	24.42	126.68	7.52
		53.58	16.5	96.22	9.9
		102.95	27.74	128.82	7.68
		69.06	16.9	158.87	12.9
		86.26	24.9	168.96	12.74
		55.4	28.21	117.13	8.61
		55.78	18.27	77.14	7.96
		47.74	27.47	128.51	8.94
		58.87	30.39	175.77	7.36
		71.29	25.89	131.16	13.14
		91.49	20.82	146.45	10.46
		70.62	28.75	137.26	7.67
		170.49	15.88	89.73	8.39
		70.05	21	107.29	7.84
		94.92	28.75	100.76	14.2
		89.65	28.8	103.95	9.03
		110.34	28.35	78.9	13
		87.29	27.73	97.76	8
		156.8	10.79	70.53	13.71
		73.62	12.84	90.3	18.13
		103.73	14.96	72.94	8.13
		70.63	13.31	81.05	12.8
		129.87	11.97	89.43	17.83
		69.73	11.61	64.02	11.2
		77.08	9.17	105.72	8.35
		67.04	10.31	69.38	9.64
		85.28	6.86	70.73	14.53
		79.7	7.75	79.02	13.88
		150.31	11.29	71.73	22.24
		83.52	10.07	48.25	11.8
		73.31	16.08	45.79	15.05
		108.56	8	86.31	11.33
		41.24	7.25	49.71	13.7
		45.27	6.5	88.96	12.07
		60.52	6.91	68.85	11.6
		63.08	7.72	74.4	13.33
		61.5	13.05	78.81	23.47
		51.26	9.64	50.05	21.34
		42.81	14.39	74.3	12.95
		56.46	10.78	69.12	13
		57.86	17.18	67.7	14.67
		46.42	11.63	51.93	11.46
		46.68	16.73	80.3	11.96
		80.32	11.42	63.77	11.61
		74.59	20.07	69.87	10.75
		80.94	18.11	94.16	6.82
		54.21	13.49	52.79	7.39
		54.32	15.91	121.07	8.28
		43.89	14.11	112.06	7.18
		91.06	12.3	189.41	7.64
		103.97	10.38	164.36	9.26
		49.76	16.03	111.08	10.73
		56.8	18.46	180.94	7.56
		60.95	11.53	144.7	7.45
		54.82	11.58	185.43	13.04
		61.17	9.85	187.79	8.11
		90.03	8.25	193.07	7.28
		77.93	12.09	119.29	8.35
		83.03	12.03	134.82	7.5
		50.09	9.82	99.61	8.47
		74.81	21.36	164.1	12.4
		56.64	33.99	139.03	12.69
		49.12	23.11	182.02	10.28
		42.1	33.34	170.38	7.63
		61.48	38.58	131.54	7.9
		42	30.82	140.16	8.92
		59.77	24.26	97.38	9.31
		48.32	22.75	174	14.55
		51.6	34.81	144.83	6.89
		68.71	30.84	135.84	8.7
		56.62	33.42	110.79	11.95
		74.75	31.13	173.64	7.81
		48.73	29.92	93.1	13.07
		40.2	28.94	89.13	17.88
		38.1	27.62	180.6	7.89
		45.01	25.83	185.79	17.01
		58.05	22.4	208.11	13.9
		47.36	20.88	162.26	10.89
		39.02	20.25	128.2	8.06
		52.59	33.47	184.24	9.35
		54.68	26.24	107.27	37.84
		51.82	34.16	146.25	49.73
		64.22	29.29	91.78	24.7
		70.56	27.56	182.77	53.34
		77.34	24.8	176.36	40.21
		57.85	30.79	130.45	33.97
		135.31	22.9	188.69	39.1
		55.23	24.15	97.55	59.96
		84.67	63.23	176.9	29.64
		70	20.36	196.81	29.33
		79.26	37.67	177.09	53.63
		52.35	50.12	166.36	38.29
		69.36	24.32	98.58	34
		81.82	31.14	184.06	41.51
		93.35	22.58	119.56	53.82
		105.62	15.39	144.36	21.28
		96.75	16.22	171.99	17.7
		57.34	15	96.87	17.43
		79.68	12.77	138.64	18.73
		69.56	14.44	132.63	23.1
		96.07	15.66	122.25	25.09
		114.25	17.71	189.09	30.82
		119.01	22.01	164.9	19.02
		61.59	19.63	133.16	43.77
		55.76	14	143.34	23.43
		66.74	14.47	129.73	33.18
		56.1	24.18	89.6	29.6
		68.25	13.94	143.95	22.74
		73.36	16.15	137	24.09
		75.38	22.94	149	17.55
		76.93	25.23	165.1	22.12
		33.6	15.97	147.35	20.69
		23.3	13	125	28.43
		38.57	15.94	113.36	33.08
		61.26	14.75	141.18	33.85
		40.94	14.23	133.8	29.59
		38.02	16.63	178.87	26.29
		33.52	31.98	131.38	24.11
		61.23	12.4	120.55	54.41
		40.93	14.33	161.41	54.46
		33.9	14.48	157.29	30.55
		34.21	17.47	162.35	21.65
		32.34	25.08	64.92	17.55
		33.78	14	62.29	29.46
		50.84	16.46	94.89	18.23
		28.69	13.5	113.15	32.72
		29.63	14.25	100.02	29.91
		51.45	16.91	101.47	18.3
		49.48	16.07	116.72	27.22
		27.73	22.05	98.31	24.77
		28.1	13.1	109.05	30.64
		42.59	26.72	132.92	27.27
		30.5	17.16	116.48	28.7
		25.39	16.11	64.08	20.8
		25.67	14.97	93.05	25.35
		38.18	31.57	91.7	20.2
		34.13	15.27	78.78	31.49
		25.88	20.34	124.91	34.82
		32.83	17.9	79.59	17.91
		47.96	16.02	81.67	39.22
		37.55	17.54	77.92	17.67
		46.36	13.56	59.18	32.56
		31	15.67	71.5	51.78
		52.43	17.91	68.8	30.5
		26.92	14.51	69.46	22.9
		24.93	14.59	83.19	26.29
		23.73	23.17	67	30.06
		35.85	18.46	73.88	67.89
		25.83	16.34	131.35
		39.19	19.86	105.36
		53.65	14.92	70.23
		26.66	18.23	85.26
		29.39	17.2	119.46
		45	13.33	130.87
		55.27	13.42	111.57
		26.67	27.34	96.57
		29.84	17.31	77.1
		30.39	22.6	79.65
		51.03	13.95	59.45
		59.44	17.1	89.19
		30.69	17.6	63.58
		36.08	13.89	93.76
		28.3	29.03	108.46
		37.45	18.35	74.61
		26	16.33	100.39
		106.56	18.71	69.75
		88	17.01	82.48
		81.47	21.11	56.18
		169.49	14.93	56.61
		95.16	16.6	40.79
		102.64	16.49	60.78
		136.86	22.57	59.56
		93.45	15.76	64.2
		148.3	15.63	60.91
		175.86	15.73	44.11
		145.48	12.8	35.9
		131.35	26.83	33.35
		163.56	22.32	54.05
		153.75	21.72	67.94
		86.94	16.03	49.57
		106	20.55	63.92
		77.19	14	48.04
		172.63		33.47
		157.67	17	47.43
		142.97	16.33	55.24
		139.2	24.66	39.36
		167.66	34.84	49.11
		100.81	17.75	48.45
		95	28.84	46.85
		88.05	14.5	65.89
		100.62	23.05	41.75
		86.95	31.2	41.7
		65	25.44	46.55
		72.48	34.67	47.29
		76.52	27.7	45.47
		71.32	24.43	85.27
		72.33	52.01	78.93
		74.55	51.22	50.27
		148.97	34.02	86.67
		70.5	35.05	40.75
		102.48	42.04	35.91
		107.55	27.76	73.36
		55.47	41.56	87.03
		55.36	28.58	78.21
		74.97	26.76	71.54
		69.43	23.12	75.4
		126.25	18.89	67.82
		110.18	47.38	72.07
		86.76	33.14	96.69
		60	23.48	94.47
		111.97	24.92	96.55
		58.5	21.08	76.93
		65.16	22.41	106.48
		139.24	18.44	100.33
		107.52	23.91	64.1
		97.07	17.27	62.81
		141.12	18.44	86.03
		110.95	18.38	65.77
		187.3	38.94	67.25
		186.62	24.48	57.66
		101.62	20.44	52.58
		159.05	18.86	78.64
		121.95	27.21	103.05
		106.41	25.72	70.79
		117.9	30.51	129.77
		135.15	25.14	94.36
		123.61	26.5	119.57
		104.92	33.02	95.43
		123.3	28.07	95.73
		162.1	26	52
		127.09	23.13	99.42
		104.92	25.1	104.68
		116.12	19.5	55.88
		146.96	27.44	109.43
		150.71	28.05	74.35
		209.37	23.16	93.41
		105.8	28.39	109.81
		163.19	19.71	91.69
		96.15	27.41	84.1
		191.13	25.04	97.62
		124.52	28.77	50.94
		109.89	32.73	93.71
		138.59	35.05	52.78
		104.91	26.47	81.19
		132.2	23.06	53
		102.71	41.94	95.91
		117.84	19	95.2
		126.65	18.62	107.57
		128.22	30.23	46.96
		100.18	27	61.74
		169.27	37.15	138.64
		168.43	35.8	45.6
		72.28	28.55	49.37
		60.1	43.73	85.46
		123.79	50.95	74.4
		65.59	74.19	79
		103.13	47.81	55.45
		80	31.68	64.79
		100.29	39.65	90.54
		132.97	52.77	88.32
		88.43	39.02	90.41
		121.59	31.27	53.45
		66.14	55.56	99.85
		89.74	40.73	71.17
		79.7	43.26	73.49
		82.9	33.62	95.3
		75.93	30.34	65.34
		121.13	30.21	45.53
		87.61	29.11	81.34
		98.76	30.31	63.47
		88.38	32.83	74.12
		61.21	33.95	94.43
		73.29	47.75	100.41
		85.96	29.75	94.38
		124.47	28.32	55.74
		82.09	28.3	54.24
		80.06	30.43	73.57
		83.97	36.93	64.21
		83.12	31.94	61.2
		104.38		50.47
		82.82	39.43	79.34
		117	49.11	59.39
		99.18	56.51	58.9
		102.68	29.56	86.28
		125.96	29	70.68
		78	33.6	123.83
		105.12	29.75	126.48
		135.02	30.27	51.63
		123.63	31.4	66.77
		151.65	29.9	62.32
		118.39	39.45	63.7
		154.17	30.35	91.25
		143.31	36.21	67.5
		122.89	42.12
		88.26	30.8
		92.09	31.5
		92.89
		134.21
		110.29
		122.78
		151.4
		99.79
		122.75
		178.6
		137.26
		90.94
		118.55
		126.68
		96.22
		128.82
		158.87
		168.96
		117.13
		77.14
		128.51
		175.77
		131.16
		146.45
		137.26
		89.73
		107.29
		100.76
		103.95
		78.9
		97.76
		97.25
		70.53
		90.3
		72.94
		81.05
		89.43
		64.02
		105.72
		69.38
		70.73
		79.02
		71.73
		48.25
		45.79
		86.31
		49.71
		88.96
		68.85
		74.4
		78.81
		50.05
		74.3
		69.12
		67.7
		51.93
		80.3
		63.77
		69.87
		94.16
		52.79
		121.07
		112.06
		189.41
		164.36
		111.08
		180.94
		144.7
		185.43
		187.79
		193.07
		119.29
		134.82
		99.61
		164.1
		139.03
		182.02
		170.38
		131.54
		140.16
		97.38
		174
		144.83
		135.84
		110.79
		173.64
		93.1
		89.13
		180.6
		185.79
		208.11
		162.26
		128.2
		184.24
		107.27
		146.25
		91.78
		182.77
		176.36
		130.45
		188.69
		97.55
		176.9
		196.81
		177.09
		166.36
		98.58
		184.06
		119.56
		144.36
		171.99
		96.87
		138.64
		132.63
		122.25
		189.09
		164.9
		133.16
		143.34
		129.73
		89.6
		143.95
		137
		149
		165.1
		147.35
		125
		113.36
		141.18
		133.8
		178.87
		131.38
		120.55
		161.41
		157.29
		162.35
