# Supplementary material for: Lysosome activity is modulated by multiple longevity pathways and is important for lifespan extension in C. elegans
Source: eLife. 2020 Jun 2;9:e55745. doi: 10.7554/eLife.55745 (PMC7274789; doi:10.7554/eLife.55745)
Supplement: Figure 8—source data 1. [file elife-55745-fig8-data1.xlsx]

## Sheet: Figure 8A-daf-16;isp-1
		daf-16;isp-1 vs isp-1
	lysosomal genes	relative mRNA level of lysosomal genes			Mean	SD
	vha-8	0.422044	0.345635	0.825264	0.530981	0.257704
	ctsa-1	1.09012	1.46166	1.39417	1.31532	0.197925
	Y40D12A.2	0.82033	0.698592	0.753384	0.757435	0.06097
	asp-4	0.549577	0.430826	0.331892	0.437432	0.108993
	asp-8	0.396704	0.110899	0.125585	0.211063	0.160938
	cpr-8	2.05938	1.141	1.02101	1.40713	0.568041		The numerical data are analyzed by GraphPad Prism 6 and represented as a bar graph in Figure 8A.
	asm-1	0.808119	0.414393	0.23204	0.484851	0.294432
	sul-3	1.93634	1.71155	1.11652	1.58814	0.423613
	Y105E8B.9	0.77283	0.621985	0.584918	0.659911	0.0995315
	lipl-7	1.03806	1.64403	1.2166	1.29956	0.311389

## Sheet: Figure 8B-isp-1skn-1
	isp-1skn-1RNAi vs isp-1
lysosomal genes	relative mRNA level of lysosomal genes			Mean	SD
vha-8	1.63589	0.443558	0.36383	0.814426	0.712524
ctsa-1	1.21339	1.50047	3.29016	2.00134	1.12534
Y40D12A.2	0.721966	2.21427	1.75199	1.56274	0.763938
asp-4	0.298693	0.415647	0.209672	0.308004	0.103303
asp-8	0.294155	0.461287	0.514319	0.423254	0.114904
cpr-8	0.734497	1.56216	1.96139	1.41935	0.625791	The numerical data are analyzed by GraphPad Prism 6 and represented as a bar graph in Figure 8B.
asm-1	0.250222	0.629915	0.136367	0.338835	0.258431
sul-3	0.107654	0.171802	0.033792	0.104416	0.0690619
Y105E8B.9	0.500615	0.35515	0.256293	0.370686	0.1229
lipl-7	0.655989	1.03805	1.38985	1.02796	0.367036

## Sheet: Figure 8K-pHtomato
		Average intensity of pHtomato per lysosome
		Control RNAi				skn-1 RNAi
		WT	isp-1	daf-16	daf-16;isp-1	WT	isp-1	daf-16	daf-16;isp-1
		63.85	34.5	93.13	64.89	57.04	109.47	127.03	38.88
		48.13	34.17	91	44.07	39.8	106.73	152.29	40.93
		54.96	46.16	72	57.32	44.19	158.09	95.33	46.28
		46.53	27.94	64.3	51.3	70.53	135.12	168.62	48.32
		48.38	34.93	86.13	86.58	90.3	156.68	127.06	34.77
		59.27	26.87	75.38	51.88	72.94	139.17	78.18	53.49
		73.74	30.64	55.5	68.95	81.05	101.81	103.15	43.54
		59.56	34.91	113.92	64.52	42.97	151.32	83.15	38.93
		37.92	40.94	110.81	65.63	35.66	91.69	99.84	58.1		The numerical data are analyzed by GraphPad Prism 6 and represented as a bar graph in Figure 8K.
		66.72	33.89	64.6	39.36	46.43	120	81.86	55.46
		69.03	61.38	164.08	48.3	49.76	125.5	116.3	76
		43.62	61.05	97.23	71.9	60.31	136.8	86.36	77.27
		89.52	40	73.28	70	38.49	107.7	142.58	55.17
		47.68	23.18	140.19	74.49	41.46	185.11	150.51	48.27
		83.1	32.22	78	68.36	55.22	145.32	160.33	61.31
		51.86	35.01	93.07	52.8	37.47	117.38	72.7	56.76
		48.37	48.84	79.58	61	37.28	200.36	132.24	53.7
		48.33	33.96	79.53	61.21	89.43	154.8	101.59	51.7
		41.32	35.34	66.89	46.33	64.02	156.59	118.72	50.85
		50.56	31.15	92.5	98.05	105.72	131.76	86.97	54.25
		42.08	58.51	153.18		69.38	155.88	81.21	37.26
		45.5	28.91	124.3	37.73	70.73	194.67	83.63	54.23
		69.15	33.42	104.75	42.67	79.02	91.8	122.38	49.14
		122.73	24.3	61.8	39.47	39.31		87.92	61.07
		42.17	24	80.32	39.57	42.9	62.26	102.1	54.77
		71.82	25.89	65.23	30.87	66.98	63.63	140.95	74.13
		52.15	35.67	145.48	62.24	58.2	45.36	94.67	36.07
		77.22	23.91	84.36	40.11	35.84	70.33	78.77	62.43
		77.16	40.14	61.05	38.71	38.13	63	81.6	49.9
		37.7	31.58	91.85	72.9	35.53	62.3	136.39	72.7
		54.04	46.89	62.8	35.78	38.05	71.15	85.13	41.84
		53.58	28.86	66.92	43.26	50.82	67.54	121.9	73.11
		102.95	51.73	87.34	53.8	115.58	75.7	173.71	58.33
		69.06	29.87	124.91	43.11	71.2	72.14	89.25	73.31
		86.26	32.78	64.5	64.57	71.18	47.08	171	34.13
		55.4	42	82.04	45.95	72.38	56.44	142.32	54.15
		55.78	56.66	72.58	38.57	123.03	96.21	106.76	45.16
		47.74	52.19	121.08	31.29	121.29	120.44	196.3	54.63
		58.87	39.31	101.43	56.28	84.15	87.59	89.6	51.09
		71.29	39.72	81.63	30.2	98.32	40.54	104.87	46.93
		91.49	24.92	121	36.04	101.29	62.29	190.22	38.8
		70.62	33.68	102.8	35.23	91.19	75.74	173.5	39.89
		170.49	40.16	89.9	33.9	85.33	59.75	107.74	33.14
		70.05	35.79	76.82	40.8	73.26	45.58	119.12	34.79
		94.92	43.98	122.88		66.4	85.05	140.76	37.47
		89.65	51.32	60.69	30.14	108.28	64.79	91.71	40.6
		110.34	48.99	86.65	27.26	165.22	55.94	85.58	39.35
		87.29	27	100.28	28.71	98.71	62.94	109.88
		156.8	28.15	68.42	36.26	108.47	50.76	92	25.67
		73.62	48.28	145.88	20.36	113.83	70.32	106.74	17.68
		103.73	25.5	84.67	26.36	181.79	63.41	170.36	33.72
		70.63	37	116.11	20.96	117.26	82.83	80.47	22.14
		129.87	44.67	65.92	32.11	99.29	41.57	81.28	29.77
		69.73	51.37	65.23	23.6	126.75	57.74	177.7	24
		77.08	33.43	103.25	23.88	104.12	47.04	102.03	29.97
		67.04	29.89	65.35	34.05	94.82	67.31	173.46	36.54
		85.28	28.45	80.23	27.32	100.94	49.36	153.85	41.47
		79.7	24.14	72.03	24.69	71.73	49.68	105	34.44
		150.31	32.34	60.53	31.06	48.25	64.46	85.73	37.85
		83.52	32.37	119.76	36.16	45.79	61.27	175.19	32.5
		73.31	32.26	170.72	21.76	86.31	67.11	97.81	33.86
		108.56	55.9	66.4	23.27	49.71	79.53	117.9	18.36
		41.24	29	115.81	21.04	88.96	54.4	164.45	37
		45.27		69.3	28.96	68.85	48.13	148.2	37.47
		60.52	9.54	138.31	19.9	74.4	51.19	172.33	48.8
		63.08	10.07	133.09	26.05	78.81	44.91	175.42	22.73
		61.5	7.02	77.8	29.94	50.05	53.81	105.5	21.73
		51.26	10.7	82.07	32.23	74.3	60	139.67	22
		42.81	7.57	106.38	23.88	69.12		155.83	32.94
		56.46	7.1	163.97	27.09	67.7	49.65	184.48	25.91
		57.86	5.89	71.56	19	51.93	60.71	190.1	40.5
		46.42	14.7	76	19.36	80.3	128.61	130.2	24.05
		46.68	7.74	68.71	29.29	63.77	96.25	184.05	19.28
		80.32	7.51	103.55	19.76	69.87	58	186.21	47.53
		74.59	6.7	160.33	30.08	94.16	62.18	86.3	25.48
		80.94	7.1	96.8	31.95	52.79	42.8	107	20.08
		54.21	5.64	67.09	19.2	105.6	52.71	136.21	26.48
		54.32	7.36	156.52	21.09	86.5	57.21	138.93	20.82
		43.89	6.5	64.52	20.2	126.21	60.33	114.14	22.86
		91.06	6.4	74.62	30.43	104.5	53.93	163.4	39.22
		103.97	8.42	71.93	29.8	109.81	55.29	130.78	21.53
		49.76	7.92	70.73	28.2	160.52	95.37	113.48
		56.8	8.18	150.35	18.88	124.56	56.63	134.71
		60.95	17.59	131.42	36.68	108.67	53.96	145.29	48.47
		54.82	10.04	151	26.09	79.17	73.11	154.79	49.82
		61.17	6.13	114.68	24.54	93.78	41.85	103.63	69.76
		90.03	11.69	164.98	25.94	122.7	51.67	184.2	62.8
		77.93	15.39	108.14	39.01	134.88	39.73	85.71	48.6
		83.03	11.61	155.32	33.8	135.84	75.42	90.38	38.79
		50.09	7	109.45	34.99	115.27	70.97	154.96	70.44
		74.81	6.21	197.69	29.16	133.94	68.7	100.24	86.31
		56.64	6.71	153.27	21.66	160.49	39.4	140.13	64.89
		49.12	7.18	139.55	31.22	99.01	35.5	135.21	63.42
		42.1	9.78	118.37	29.14	207.79	59.35	177.53	47.54
		61.48	15.67	102.23	32.49	192.29	72.19	136.64	50.71
		42	5.18	135.2	29.97	110.43	65.82	108.73	87.36
		59.77	6.8	112.17	19.67	90.16	44.21	152.42	72.11
		48.32	9.86	188.49	16.89	97.76	44.27	170.6	84.58
		51.6	7.24	153.82	26.45	83.38	64.64	38.9	96.76
		68.71	6.68	98.53	16.73	167.75	41.05	43.5	37.09
		56.62	7.65	140.19		91.15	40	75.02	61.53
		74.75	7.25	114.07	78.47	123.04	41.71	59.27	68.14
		48.73	6.5	209.63	70.32	94.29	68.56	40.68	42
		40.2	7.29	214	73.58	80.45	49.81	47.28	62.45
		38.1	9.75	99	65.99	98.42	60.52	46.64	73.09
		45.01	7.38	190.96	42.23	119.7	41.67	56.96	45.33
		58.05	7.19	152.16	47.24	52.83	49.7	32.9	62.52
		47.36	11.04	106.85	37.23	69.38	56.26	45.6	56.27
		39.02	6.36	180.61	42.5	52.43	58.2	64.64	46.52
		52.59	11.22	161.37	70.59	63.44	46.7	64.07	46.96
		54.68	6.42	108.16	66.38	53.8	32.82	94.24	54.55
		51.82	5.5	151.46	47.33	77.78	38.38	43.38	51.29
		64.22	8.11	175.08	51.03	57.6	41.55	50.95	49.62
		70.56	7.45	179	45.75	65.15	34.07	58.79	53.62
		77.34	7.71	100.5	49.47	54.67	76.62	54.6	43.25
		57.85	8.18	125.44	52.41	63.84	50.63	80.6	51
		135.31	7.59	115.5	49.73	83.21	40.75	53.33	60.46
		55.23	7.3	126.65	77.3	98.2	50.96	41.32	64.83
		84.67	5.93	126.8	56.7	71.43	46.33	40.04	70.76
		70	13.47	162.2	40.09	102.36		52.66	75.67
		79.26	10.11	66	52.08	53.14	94.88	48.3	74.92
		52.35	10.85	89.29	70.38	92.07	105	41.57	44.2
		69.36	10.68	56.82	44.85	68.57	110.92	33.5	44.4
		81.82	14.25	52.03	62.72	83.73	101.2	52.39	66.67
		93.35	8.82	125	68.8	98.21	89.73	37.99	67.64
		105.62	9.89	86.13	57.83	138.65	91.27	113.23	45.13
		96.75	7.3	72.31	65.87	92.08	96.67	167.53	91.31
		57.34	8.33	50	88.52	90.2	97	161.18	42
		79.68	8.61	76.2	58.41	64.55	87.1	161.86	78.97
		69.56	5.83	51.03	48.5	61.78	83.85	198.58	70.8
		96.07	6.92	81.4	43.07	81.27	93.93	152.34	43.34
		114.25	8.59	70.33	38.91	61.27	103.27	181.25	43.46
		119.01	10.13	58.75		108.85	104.21	193.78	53.44
		61.59	7.71	105.72	46.21	117.2	165.06	168.17	45.29
		55.76	6.95	41.55	58.24	66.83	79.76	175.7	45.58
		66.74		73.63	75.24	73.84	85.98	221.77	58.66
		56.1	13.79	74.67	52.16	103.69	72.5	134.26	54.57
		68.25	31.26	45.18	75.42	99.66	127.8	195.74	38.37
		73.36	18.25	57.23	60.79	52.72	82	137.79	78.96
		75.38	33.45	71.16	72.5	76.06	71.5	181.16	41.77
		76.93	33.66	60.88	56.66	90.53	84.33	151.43	78.56
		33.6	15.5	48.91	47.6	58.94	78.82	112.32	72.21
		23.3	14.95	64.77	48.61	125.05	134.07	165.3	89.14
		38.57	23.91	93.95	38.42	73.63	117	133.2	67.15
		61.26	30.68	68.88	59.82	111.15	81.35	128.41	58.04
		40.94	17.68	70.92	45.45	83.06	86.63	183.61
		38.02	14.95	60	56.98	123.44	73	211.16	44.79
		33.52	16.67	76.71	41.82	70.25	113.21	157.31	33.4
		61.23	13.81	63.55	55.45	102.46	72.64	210.82	37.89
		40.93	23.74	58.88	40.58	83.41	108.19	216.03	37.27
		33.9	17.93	143.52	94.52	100.9	132.85	163.28	43.23
		34.21	13.24	93.12	42.29	92.52	84.9	145.71	33.17
		32.34	25.21	68.71	61.05	93.67	152.29	212.18	36.1
		33.78	16.5	72.5	54.87	59.98	87	205.46	26.58
		50.84	29.97	92	62.48	84.4	137.96	185.12	30.93
		28.69	18.31	88.66	45	65.27	153.66	120.23	48.16
		29.63	19.68	94.86	56.57	85.38	96.12	160.79	56.8
		51.45	16.92	112.97	91.95	60.47	114.94	199.79	58.5
		49.48	17.54	74.7	51.17	64.57	114.31	157.08	30.37
		27.73	26.46	136.23	44.08	104.85	73.18	134.32	66.05
		28.1	15.5	83.38	65.31	63.4	117.65	184.98	26.93
		42.59	35.66	80.52	66.45	141.63	89.8	183.72	30.12
		30.5	26.1	54.5	48.44	104.21	84.95	108.08	37.03
		25.39	22.5	79.15	43.55	57.13	102.77	187.17	27.74
		25.67	13.5	108.55	50.22	86.43	97.44	154.06	30.71
		38.18	29.09	134.59	47.83	72.23		137.47	31.5
		34.13	13.2	65.29	36.9	63.15	91.3	114.21	30.47
		25.88	16.96	111.39	41.41	113.75	58.82	125.79	30.93
		32.83	17.04	77.66	56.88	106.21	65.9	117.29	36.31
		47.96	23.76	60.61	44.24	95.51	129.75	130.27	46.93
		37.55	16.5	75.2	35.8	114.38	88.33	99.73	25.67
		46.36	22.19	67.77		93.56	129.01	104.5	45.89
		31	17.13	77.4	63	87.61	52.22	180.33	27.4
		52.43	18	90.06	74.93	108.53	82.25	160.62	34.86
		26.92	18.53	55.75	78.91	94.85	118.55	151.17	31.11
		24.93	23.51	96.6	53.67	60.8	84.59	156.59	71.22
		23.73	21.29	58.54	51.75	140.32	80.23	123.88	30.1
		35.85	27.24	78.85	86.78	97.03	68.59	121.35	28.09
		25.83	14.82	72.33	94.35	57.3	72.94	127.41	39.64
		39.19	18.73	103	98.58	112.02	101.21	118.88	50.16
		53.65	27.55	66.5	76.06	55.59	127.35	145.68	31.08
		26.66	16.92	54.64	73	94.65	114.69	105.4	58.44
		29.39	22.24	76.17	76.23	103.84	56.67	63.72	27.47
		45	18.6	77.6	126.47	91.56	87.83	101.49	31
		55.27	25.48	80.46	125.72	77.83	78.63	91.96	38
		26.67	18.75	97.52	98.79	70.58	55.88	92.13	47.43
		29.84	26.28	51.67	103.77	92.74	80.08	72.55	38.2
		30.39	23.49	59.94	85.95	70.88	59.55	132.8	46.67
		51.03	21.52	56.84	88.45	65.36	144.55	95.63
		59.44	19.18	77.75	52	86.39	63.12	145.92	37.59
		30.69	26.3	63.95	49	124.37	93.71	79.48	27.45
		36.08	23.77	84.13	118.11	101.87	86.51	107.59	32.44
		28.3	16.86	56.5	66.81	95.47	108.27	72.55	37.53
		37.45	23.23	109.55	104.87	114.65	65.21	82.91	21.29
		26	17.62	59.28	86.06	92.25	76.55	81.74	36.14
		106.56		63.94	61.94	108.67	109.81	70.4	28.72
		88	35.09	57.35	102.87	146.31	84.6	149.17	24
		81.47	43.79	150.77	69.67	106.56	77.91	77.03	34.24
		169.49	31.63	59.92	75.8	140.17	73.75	154.34	21.45
		95.16	33.73	93.78	105.4	95.55	93.91	136.65	36.77
		102.64	50.89	74.35	67.58	103.38	86.07	63.53	24.67
		136.86	36.76	67.3	83.26	129.88	70.44	78.23	37.28
		93.45	37.56	95	65.47	106.37	56	99.21	22.67
		148.3	38.09	82.29	84.8	107.37	61.9	96.55	39.1
		175.86	27.41	68.64	89.34	202.02	62.15	81.38	22
		145.48	54.36	158.78	84.26	145.84	70.45	70.27	21.54
		131.35	48.97	123.14	123.41	161.63	52.65	76	22.2
		163.56	41.72	73.64	63.6	100.36	54.64	133.25	25.3
		153.75	25.71	65.5	57.11	174.01		119.13	27.91
		86.94	29.18	149.86	73.08	127.05	71	95.83	34.34
		106	47.44	71.2	82.76	145.79	69.25	70.17	22.91
		77.19	43.32	86.63	110.72	176.65	87.85	94.67	31.68
		172.63	29.68	76.15	111.79	201.87	121.89	114.92	24.96
		157.67	58.39	66.83	86.67	111.1	69.89	88.49	19.67
		142.97	46.42	86.18	69.11	160.3	103.77	64.06	28.95
		139.2	29.61	64.52	71.06	94.55	115	80.45	25.14
		167.66	50.97	74.75	55.65	154.86	127.53	74.6	38.63
		100.81	34.57	133.68	111.95	122.33	140.65	30.17	28.64
		95	49.55	136.43	77.33	152.48	94.63	41.6	18.84
		88.05	24.09	80.74	70.28	139.92	85.9	39.68	22.5
		100.62	29.6	75.31	53.75	181.2	86.54	68.69	47.56
		86.95	31.31	58	66.86	124.35	79.33	82.96	21.14
		65	46.48	91.91	79.78	102.62	93.86	49.54	24.03
		72.48	42.21	60.6	68.97	105	74.5	44	18.16
		76.52	38.15	55.05	69.27	110.9	72.24	49.09
		71.32	33.4	103.65	68.75	192.64	103.14	64.55	34.27
		72.33	69.26	70.44	68.6	142.84	67.9	40.93	22.82
		74.55	40.84	74.56	56.32	140.57	103.67	39.79	29
		148.97	72.89	64.2	34.25	114.3	112.03	65.61	51.33
		70.5	51.77	57	27.57	178.81	63.67	35.52	39.92
		102.48	34.83	77.11	27.81	108.5	84.96	52.93	36.45
		107.55	46.48	78.01	29.55	177.74	154.35	53.55	31.88
		55.47	28.07	71.59	24.73	98.82	106.36	75.62	53.1
		55.36	47	56.57	21	60.91	83.44	34.13	23.28
		74.97	25.18	67.79	29.33	115.28	107.58	29.73	24.55
		69.43	48.88	62.44	27.23	46.42	111.91	38	50.46
		126.25	31.56	66.35	38.56	71.74	68.96	43	35.75
		110.18	35.6	108.14	43.06	52.62	71.67	46.38	25.82
		86.76	37.61	145.38	42.56	141.23	75.36	28.25	24.4
		60	36.61	99	30.02	172.28	76.53	32.33	54.71
		111.97	34.25	75.32	36.17	182.25	105.59	50.63	31.49
		58.5	30.58	150.47	25.1	163.57		35.74	29.8
		65.16	29.29	125.18	28.85	116	53.54	49.48	25.15
		139.24	25.89	106.86	32.41	120.5	66.11	65.66	33.42
		107.52	33.78	142.32	32.95	209.78	69.04	60.08	23.2
		97.07	32.91	120.38	27.77	217.95	53.22	71.45	24
		141.12	56.41	189.11	26.38	189.49	49.67	47.1	27.2
		110.95	29.14	137.23	39.88	210.34	53.58	27.86	40.13
		187.3	34.65	102.95	27.65	92.5	45.48	38.93	38.18
		186.62	31.1	90.06	35.72	200.75	45.17	40.12	32
		101.62	29.81	87.92	29.58	169.14	52.33	70.3	42.21
		159.05	33.5	112.4	33.71	159.72	51.48	54.94	44.03
		121.95	27.14	99.88	28.85	96.52	49.57	64.06	38.77
		106.41	70.17	113.38	27.55	175.04	76.08	41.81	33.17
		117.9	37.75	148.57	23.31	169.38	65.09	41.13	41.47
		135.15	43.31	189.17	32.91	209.67	46.11	61.71	32.81
		123.61	28.67	105.42	74.23	112.5	68.47	32.92	40.11
		104.92	35.88	131.77	71.04	105	39.5	35	41.31
		123.3	28.37	109.26	45.07	211.67	42.94	30.7	26.11
		162.1	44.76	129.07	55.49	134.28	49.9	43.88	30.05
		127.09	45.68	130.13	35.98	186.67	81.56	40.57	29.75
		104.92	38.4	83.1	36.75	150.42	65.69	31.9	38.38
		116.12	44.9	181.5	41.5	152.86	65.53	52.01	45.08
		146.96	47.16	101.63	68.55	125.07	79.24	32.43
		150.71	32.91	105	50.14	145	48.56	58.13	26.38
		209.37	26.96	121.63	87.74	163.02	74.4	45.72	19
		105.8	50.73	198.01	65.79	135.7	53.62	45.23	26.68
		163.19	47.24	106.73	70.73	189.19	64.57	30.6	18.3
		96.15	44.24	88.29	48.06	115.76	85.39	41.38	18.03
		191.13	38.76	148.81	82.19	120	71.96	50.59	16.42
		124.52	36.69	108.36	52.25	191.2	93.95	33.94	33.46
		109.89	37.28	152.87	50.37	169.14	112.57	38.19	20.61
		138.59	29.75	95.2	110.14	133.67	65.65	59.7	28.95
		104.91	39.14	105.52	125.79	171.4	69.49	51.32	19.1
		132.2	37.13	162.06	66.38	143.64	50.51	41.06	19.04
		102.71	41.58	141.72	62.2	167.91	40.94	34.62	33.19
		117.84	46.16	134.49	80.04	130.34	59.32	78.29	28.1
		126.65	33.21	102.7	69.84	116.4	49.1	60.45	21.69
		128.22	33.86	162.99	51.85	110.97	61.4	37.7	19.48
		100.18	46.89	97.19	107.49	104	79.13	28.29	27.2
		169.27	44.82	113.5	53.16	162.88	50.93	30.6	47.32
		168.43	25.67	101.39	79.6	193.81	82.71	78.53	19.75
		72.28	36.92	112.5	74.3	172.58	42.7	40.07	22.27
		60.1	34	144.32	58.04	147.58	82.53	46.85	23.2
		123.79	39.2	106.93	85.64	130.84	47.43	57.03	34.68
		65.59	29.97	169.63	108.1	202.22	136.77	31.29	24.84
		103.13	36.2	114.62	81.1	110.69	77.6	87.9	45.91
		80	27.91	154.68	55.54	123.93	58.8	133.18	28.45
		100.29	53.59	164.54	107.89	121.35	82.11	66.63	24.8
		132.97		142.57	68.25	142.76	77.89	103.2	34.91
		88.43	52.72	175.57	56.64	154.63	41.55	75.91	27.29
		121.59	52.47	109.5	92.34	116.3	45	133.72	18.39
		66.14	50.88	169.35	51.88	108.84	59.67	131.44	18.33
		89.74	71.85	125.98		154.17	67.87	165.47	25.73
		79.7	79.17	79.4		194.35	51.3	105	19.27
		82.9	50.58	91.71		114.26	78.56	80.64	23.69
		75.93	73.17	161.79		116.63	66.8	166.14	34.67
		121.13	81.7	87.24		102.4	61.84	77.73	24.27
		87.61	68.06	115.69		145.05	62.36	73.75	35.82
		98.76	55.65	152.85		109	53.68	127.17	21.56
		88.38	74.36	81.8		134.63	87.03	97.84	16.87
		61.21	104.89	109.41		174.28	77.82	86.05	29.59
		73.29	66.03	162.74		166.23	96.05	97.24	22.77
		85.96	61.89	85.27		69.38	64	135.48	22.27
		124.47	83.8	112.33		52.43	56.67	90.7	71.1
		82.09	77.63	119.96		63.44	57.07	135.05	87.41
		80.06	66.64	101.8		53.8	85.41	135.76	61.09
		83.97	64.94	108.25		77.78	62.33	122.63	65.96
		83.12	90.9	116.87		57.6	56.89	86	73.14
		104.38	108.91	89		65.15	61.43	173.9	119.08
		82.82	70.06	139.25		54.67	57.74	129.18	64.61
		117	55.9	142		63.84	50.13	92.26	85.18
		99.18	57.27	106.54		83.21	92.94	90.19	64.5
		102.68	113.75	115.51		98.2	52.5	71.42	91.93
		125.96	77.44	120.33		71.43	51.27	81.4	77.6
		78	68.58	220.08		102.36	87.07	123.11	64.47
		105.12	89.7	109		53.14	60.28	138.89	69.35
		135.02	94.56	80.15		92.07	56.38	91.75	60.86
		123.63	95.97	91.71		68.57	53.45	123.11	108.67
		151.65	68.15	187.81		83.73	67.61	137.06	106.89
		118.39	52.89	92.6		98.21	77.86	120.17	97.32
		154.17	142.42	107.76		138.65		78.19	89
		143.31	48.46	103.59		92.08	48.97	80.25	83.08
		122.89	83.78	83.6		90.2	46.62	103.49	69.25
		88.26	59.36	87.64		64.55	51.15	103.42	62
		92.09	86.85	104.63		61.78	42.09	82.59	104.39
		92.89	86.45	119.16		81.27	48.06	88.79	77.12
		134.21	111.55	93.42		61.27	49.17	79.46	67.14
		110.29	54	113.69		108.85	38.21	92.78	49.81
		122.78	71.06	89.29		117.2	37.5	73.82	58.46
		151.4	90.63	98.15		66.83	60.25	91.58	97.21
		99.79	67.6	96		73.84	48.19	138.34	92.63
		122.75	63.77	149.88		103.69	57.41	82.04	59.44
		178.6	127.35	74.9		99.66	42	93.72	103.95
		137.26	54.15	125.75		52.72	38.12	123.18	56.14
		90.94	87.89	96.4		76.06	38.69	71.16	92.2
		118.55	85.67	123		90.53	97.23	94.09	68.82
		126.68	139	75.95		58.94	58.2	115.1	56.84
		96.22	66.19	107.42		125.05	48	78.85	53.23
		128.82	85	96.59		73.63	41.39	48.11	105.18
		158.87	61.75	124.05		111.15	79.36	129.6	104.21
		168.96	54.44	84.62		83.06	38.8	98.97	123.56
		117.13	57.67	107.47		123.44	40.21	137.87	79.96
		77.14	120.33	103.55		70.25	52.83	95.39	79.46
		128.51	99.14	92.53		102.46	86.95	62.83	90.64
		175.77	130.73	90		83.41	60.82	63.48	85.38
		131.16	80.33	137		100.9	86.2	81.74	95.75
		146.45	76.75	92.41		92.52	48.38	52.83	93.82
		137.26	62.21	98.36		93.67	59.48	95.39	83.61
		89.73	87.16	70.58		59.98	43.7	73.29	72.76
		107.29	79.78	129.74		84.4	38.65	91.02	63.82
		100.76	49.95	123.71		65.27	87.61	66.5	53.33
		103.95	95.3	124.44		85.38	69.74	105.82	66.52
		78.9	68.22	134.46		60.47	51	65.25	55.51
		97.76	76.71	120.27		64.57	49.74	64	49.64
		97.25	68.38	108		104.85	54.61	120.3	64.2
		70.53	82.85	77.78		63.4	96.97	92.22	94.87
		90.3	55.55	152.73		141.63	41.71	70.01	86.88
		72.94	72.27	86.91		104.21	65.21	72.18	58.93
		81.05	65.12	115.48		57.13	45.62	61.65	122.74
		89.43	51.69	73.83		86.43	49	78.1	82.13
		64.02	101.19	107.79		72.23	42.48	90.16	65.4
		105.72	77.51	96.29		63.15	39.5	66.26	100.74
		69.38	72.57	119.47		113.75	55.54	91.61	57.88
		70.73	57.87	155.01		106.21	41.62	92.56	54.37
		79.02	63.62	99.56		95.51	53.63	54.23	77.62
		71.73	70.59	118.77		114.38	38.63	69.67	96.35
		48.25	68.13	51.25		93.56	43	100.37	56.33
		45.79	61.33	50.65		87.61	66.13	61.73	80.36
		86.31		44.12		108.53	63.71	79.6	60.06
		49.71	41.97	54.76		94.85	42.74	135.02	47.25
		88.96	36.54	43.23		60.8	48.18	123.66	50.68
		68.85	80.01	69.92		140.32	51.58	134.1	60.9
		74.4	44.45	43.78		97.03	51.22	81.55	66.55
		78.81	54.99	42.42		57.3	39.43	129.61	70.16
		50.05	40.85	46		112.02	42.33	62.43	68.71
		74.3	47.27	72.01		55.59	57.1	132.53	65.67
		69.12	41.85	46.8		94.65	98.4	62.69	66.92
		67.7	46.57	68.9		103.84	58.68	85.48	65.46
		51.93	50	60.13		91.56	34.6	48.64	64.18
		80.3	36.15	41.33		77.83	42.69	62	64.29
		63.77	72.54	34.92		70.58	64.1	199.58	127.3
		69.87	63.18	65.54		92.74	60.78	126.5	70.44
		94.16	58.8	46.07		70.88	88.31	174.78	81.79
		52.79	52.53	49.08		65.36	47.2	185.06	114.75
		121.07	44.67	39.73		86.39	41.73	180.7	149.63
		112.06	50.02	40.54		112.73	74.12	154.77	73.57
		189.41	34.23	53.72		91.41	56.02	181.05	64.5
		164.36	34.7	37.71		161.36	55.84	128.65	65.69
		111.08	74.92	41.25		111.36	37.18	186.51	69.2
		180.94	56.92	77.45		96.25	46	129.03	150.1
		144.7	83.06	41.45		118.24	48.92	122.58	95.08
		185.43	43	43.06		119.21	46.18	110.13	67.32
		187.79	46.91	115.34		101.72	74.89	196.61	76.17
		193.07	65.38	47.41		145.35	68.27	110.95	106.03
		119.29	54.72	38.25		168.88	45.74	179.36	83.06
		134.82	52.41	44.46		183.65	44.27	164.17	64.17
		99.61	62.91	73.3		78	42.66	158.09	114.37
		164.1	53.19	84.61		93.38	41.95	104	94.08
		139.03	62.52	77.2		94	76.44	122.28	130.14
		182.02	62.71	80.78		97.53	35.76	163.27	106.22
		170.38	71.62	46.42		160.49	44.39	172.22	94.97
		131.54	57.08	39.2		80.08	56.32	179.24	122.64
		140.16	53.3	41.56		133.76	55.94	142.31	84.5
		97.38	44.33	41.39		86.09	40.17	93.42	116.35
		174	53.75	43.43		118.64	38.93	179.13	88.49
		144.83	79.3	46.84		161.4	42.13	128.91	67.92
		135.84	49.63	37.67		102.21	43.75	184.35	111.92
		110.79	41.96	44.75		164.96	56.58	44.25	68.71
		173.64	51.4	95.1		99.03	59.89	54.65	126.75
		93.1	38	57.13		94.97	39.16	54.21	151.01
		89.13	65.73	42.5		155.38	54.89	71.22	102.82
		180.6	63.63	49.3		77.17	52.8	63.5	82.57
		185.79	32.8	66.74		163.98	43.08	58.73	98.38
		208.11	63.96	61.5		74.67	40.81	52.13	107.25
		162.26	46.33	35		147.07	99.24	75.86	147.15
		128.2	66.2	102.93		86.44	72.24	45.88	93.21
		184.24	43.42	47.82		126.97	51.25	61.69	128.89
		107.27	44.25	47.13		125.24	57.67	50.87	135.23
		146.25	37.5	92.5		98.32	102.63	49.88	104.81
		91.78	47.08	52.84		147.11	47.52	56.61	94.14
		182.77	85.99	37.83		102.04	45	50.08	83.48
		176.36	62.74	67.95		97.07	60.58	59	106.22
		130.45	54.06	53.36		110.65	82.38	83.52	94.97
		188.69	65.82	60.25		174.03	50.28	59.06	122.64
		97.55	39.65	122.12		82	47.5	66.4	84.5
		176.9	62.48	110.55		150.5	54.25	110.1	116.35
		196.81	43.02	56.76		155.66	59.21	63.6	88.49
		177.09	45.22	81.37		135.67	38.7	85.83	67.92
		166.36	63.2	59.8		138.14	52.1	90.52	111.92
		98.58	62.83	77.39		83.79	65.12	94.21	68.71
		184.06	44.18	77.22		98.84	55.64	113.65	126.75
		119.56	59.22	57.75		106.75	35.5	47.31	151.01
		144.36	40.9	70.94		100.8	43.92	61.1	102.82
		171.99	41.58	81.45		115.54	66.29	100.64	82.57
		96.87	55.42	71.66		86.91	51.81	54.77	98.38
		138.64	59.92	55.67		129.38	57.94	46.24	107.25
		132.63	40	136.1		105.38	65.73	88.22	147.15
		122.25	54.2	76.21		96	41.45	55.06	93.21
		189.09	47.42	94.58		97.83	66.33	127.98	128.89
		164.9	59.66	54.04		124.6	54.85	58.17	135.23
		133.16	46.94	92.02		173.1	53.54	53.13	104.81
		143.34	83.26	53.64		114.89	48.11	59.39	94.14
		129.73	54.79	60		170.26	46.45	117.52	83.48
		89.6	47.55	65.36		182.96	66.21	91.45	141.42
		143.95	54.72	55.69		89.81	36.7	44.46	75.66
		137	34.9	129.3		94.5	80.91	82.33	67.72
		149	32.08	80.69		92.43	30.38	113.37	150.21
		165.1	37.13	88.69		137.89	24.8	84.53	92.26
		147.35	46.23	75.83		87.89	23.13	75.04	74.72
		125	33.33	82.42		101.88	24.86	79.38	67.81
		113.36	39.15	70.18		108.07	75.61	67.47
		141.18	52.53	57.36		156.25	24.5	77.54
		133.8	36.04	49.77		135.13	22.65	115.11
		178.87	42.58	59.48		99.36	27.59	144.27
		131.38	106.76	66		157.54	28.87	132.42
		120.55	40.9	64.53		191.34	35.02	94.92
		161.41	67.56	70.87		116.72	32.25	149.73
		157.29	69.86			110.62	38.77	145.08
		162.35	48.49			173.91	31.58	159.23
			55.58			155.4	28.16	140.42
			71.58			184.16	36.55	168.16
			40.29			107.32	25.7	176.26
			56.35			69.25	41.1	181.09
			51.66			62	31.35	197.56
			50.4			104.39	21	121.38
			114.92			77.12	29.54	161.07
			40.8			67.14	19.8	124.79
			51.97			49.81	30.16	163.12
			37.79			58.46	31.09	121.47
			27.06			97.21	39.57	96.5
			32.53			92.63	28.94	165.58
			23.36			59.44	26.75	90.5
			29			103.95	32.37	106.64
			54.09			56.14	34.54	143.13
			30.97			92.2	31.62	185.57
			36.07			68.82	30.46	117.18
			37.33			56.84	20.22	206.22
			27.3			53.23	33.89	109.81
			40.43			105.18	36.75	103.58
			31.71			104.21	21.9	174.17
			29.27			123.56	43.7	132.36
			29.64			79.96	22.69	94.33
			26.88			79.46	21	129.92
						90.64	24.67	82.92
						85.38	43.02	123.71
						95.75	31.03	82.75
						93.82	27.95
						83.61	33.02
						72.76	22.29
						63.82	31.82
						53.33	22.93
						66.52	34.92
						55.51	42.42
						49.64	51.08
						64.2	39.46
						94.87	90.62
						86.88	49.18
						58.93	35.93
						122.74	38.85
						82.13	39.84
						65.4	39.01
						100.74	41.98
						57.88	42.42
						54.37	55.61
						77.62	38.48
						96.35	40.39
						56.33	41.82
						80.36	49.41
						60.06	37.73
						47.25	33.7
						50.68	57.66
						60.9	34.46
						133.49	43.33
						158.97	45.19
						152.9	37.24
						224.35	56.76
						177.47	34.09
						183.19	34.44
						181.75	37.79
						171.03	40.71
						180.07
						140
						123.18
						216.39
						131.65
						111.85
						191.59
						209.79
						107.38
						111.54
						176.09
						145.5
						164.76
						157.29
						199.07
						120.86
						195.86
						128.43
						187.26
						117.64
						206.95
						201.98
						188.43
						146.91
						164.21
						166.79
						209.55
						177.71
						138.21
						161.96
						213.39
						187.81
						181.1
						135.33
						181.29
						166
						124.45
						121.4
						141.75
						167.41
						183.07
						148.25
						139.09
						159
						157.7
						123.1
						143.94
						166.95
						139.2
						129.56
						114.77
						199
						160.08
						186.73
						105.71
						198.27
						100.69
						111.12
						97.81
						82.32
						60.93
						102.68
						85.86
						153.67
						65.07
						81.79
						104.32
						65.89
						84.78
						101.02
						114.52
						67.66
						70.22
						71.6
						95.16
						110.2
						64.14
						71.48
						101.48
						64.13
						105.35
						62.91
						143.81
						119.03
						80.49
						131.26
						85.51
						57.12
						90.74
						114.77
						103.93
						60.15
						88.39
						92.47
						78.33
						76.71
						79.76
						109.85
						93.33
						60.71
						72.13
						81.24
						92.35
						63.32
						76.02
						89.67
						65.31
						109.07
						109.22
						59.3
						85.14
						83.36
						123.85
						83.5
						54
						71.11
						110.21
						87.84
						63.89
						77.67
						164.6
						107.22
						97.24
						131.22
						103.09
						97.82
						78.5
						69
						88.12
						64.95
						77.1
						109.43
						63.5
						96.67
						90.87
						92.83
						91.25
						135.88
						92.2
						91.46
						93.14
						138.86
						107.5
						83.1
						152.59
						94.33
						114.98
						138.67
						116.02
						69.69
						81.4
						133.09
						158.87
						143.6
						82.16
						108.55
						164.52
						108.22
						90.25
						81.21
						149.06
						119.71
						75.46
						74.09
						69.88
						93.7
						146.99
						105.41
						129.29
						79.24
						97.32
						186.73
						134.28
						127.89
						73.45
						82
						86.57
						91.3
						79.66
						145.68
						98.75
						82.6
						123.8
						116.48
						153.57
						107.69
						75.1
						136.14
						89.75
						134.44
						109.82
						100.92
						85.7
						116.09
						79.34
						77.93
						74.5
						164.36
						96.39
						91.97
						108.1
						74.57
						153.14
						101.22
						88.64
						136.73
						190.12
						87.29
						83.64
						88.44
						151.76
						106.16
						143.19
						90.78
						98.46
						118.64
						119.34
						91.49
						174.18
						73.42
						119.33
						75.94
						79.07
						183.35
						149.95
						81.16
						131.67
						88.6
						124.59
						93.69
						98.93
						91.51
						113.89
						74.31
						69.05
						73.1
						89.48
						160.21
						138.23
						85.9
						82.33
						86.54
						76.73
						87.43
						76.7
						71.73

## Sheet: Figure 8L-LSG-LTR
			Relative intensity of LSG/LTR in the intestine
			Control RNAi				skn-1 RNAi
			WT	isp-1(qm150)	daf-16(mu86)	daf-16;isp-1	WT	isp-1(qm150)	daf-16(mu86)	daf-16;isp-1
			1.03817	2.10418	2.32089	0.554989	1.2855	0.960784	1.49217	0.33138
			1.06988	2.12368	1.25141	0.582656	0.985	0.829268	1.72781	0.44505
			0.876582	1.89657	1.23549	0.830986	0.554926	0.821803	1.17166	0.440856
			1.08555	2.16219	1.04623	0.676014	0.60733	1.03297	1.35424	0.371083
			0.989179	2.01649	1.01869	0.710377	0.71939	0.791525	1.45298	0.440773
			1.09286	2.29752	1.11558	0.754491	0.743195	1.17762	1.18744	0.528505
			0.95657	2.50997	1.1114	0.677496	1.403	0.851064	0.984405	0.308766	The numerical data are analyzed by GraphPad Prism 6 and represented as a bar graph in Figure 8L.
			0.937367	1.87413	1.20666	0.910383	1.35206	0.879852	1.10173	0.353404
			1.00819	2.27561	1.74503	0.730088	0.521259	0.73	1.06238	0.380438
			0.939619	2.36741	1.06256	0.648841	1.16413	0.864532	1.35411	0.372032
			1.15414	2.63339	1.04092	0.537156	1.19054	1.18768	1.93199	0.314812
			1.0543	2.16043	1.07605	0.299582	1.3637	0.993902	1.16018	0.310139
			1.13929	1.73169	2.29827	0.599882	1.31825	0.880952	2.47694	0.344897
			0.769461	2.72435	1.01679	0.669691	1.63448	1.25063	1.21002	0.28828
			1.08767	1.75394	1.43291	0.339286	1.19278	0.760369	1.89817	0.296135
			1.09357	2.15292	1.67316	0.450681	1.09637	0.821033	1.4552	0.403392
			0.871489	1.90973	2.07207	0.599705	1.29469	0.864615	1.555	0.509603
			1.28259	2.18583	1.2935	0.639549	1.04252	0.85348	2.03604	0.351174
			0.885057	2.07083	1.16021	0.548872	1.27293	0.779736	1.49925	0.332483
			0.970379	2.24032	2.8704	0.674001	1.25103	0.727273	1.37282	0.221524
			1.17861	2.06409	1.08333	0.363851	1.1023	0.937788	0.701361	0.346724
			0.802974	1.90842	1.36567	0.586305	1.02367	1.31593	0.721565	0.453074
			0.841727	2.37322	1.04233	0.594928	1.17751	1.01647	0.882525	0.312722
			1.01787	2.24133	1.48607	0.39016	1.21916	0.804348	0.842972	0.386952
			0.976139	2.45017	1.17091	0.329736	1.13262	1.14043	0.774917	0.479759
			1.09452	1.85966	1.6846	0.41648	1.39928	0.692157	0.923077	0.371441
			1.035	1.83122	1.64174	0.380499	1.11475	1.01582	0.78732	0.357749
			1.04148	2.165	1.68682	0.66485	1.08175	0.821029	0.869117	0.345429
			0.746988	1.85307	0.817803	0.567976	1.38216	1.22741	1.28561	0.289352
			1.22959	2.21496	1.75559	0.34405	1.15066	0.86	0.675981	0.480886
			1.1675	2.41506	1.3976	0.539513	1.25586	0.942857	0.751621	0.465574
			1.0217	1.20968	1.22866	0.633628	1.12896	0.288312	0.863214	0.308471
			1.01414	1.14354	1.29847	0.299056	1.2225	0.853261	0.818686	0.38432
			0.980704	2.18491	1.84091	0.486534	0.988253	0.912833	0.942375	0.334603
			0.897605	2.49517	1.93443	0.662493	1.1447	0.751055	0.657234	0.271349
			1.4	2.0264	1.61259	0.330247	1.27224	0.935897	0.904311	0.588465
			0.919149	2.10568	1.31025	0.59696	1.20745	0.861284	0.815357	0.37381
			0.986318	1.23375	1.03821	0.618088	1.11508	0.991379	0.897663	0.473321
			0.961252	1.9669	1.62892	0.604679	1.18313	1.46	0.791536	0.401807
			1.05004	1.77015	1.77788	0.323581	0.973743	0.46648	0.904087	0.398286
			0.910881	2.43908	1.01959	0.330508	1.00487	1.04518	0.876502	0.400916
			1.13161	2.10577	1.06977	0.339557	1.12155	0.940874	1.04013	0.422074
			0.954059	2.53275	1.38027	0.55	1.05963	1.3731	0.721131	0.301299
			1.02653	2.08378	1.43112	0.605096	1.14492	1.02896	0.93537	0.518177
			0.780942	2.2588	0.94948	0.36646	1.20324	1.06702	0.80619	0.378508
			1.11625	2.22716	1.38718	0.550148	1.22712	0.720077	1.20289	0.587131
			1.05592	2.23861	1.35125	0.483316	1.26908	1.06325	1.01658	0.476995
			0.864495	1.2691	2.27236	0.552962	1.11429	1.02326	1.02737	0.325253
			0.849711	1.95473	0.950476	0.35873	1.4107	0.854839	0.867421	0.443575
			1.23964	2.10872	1.40989	0.554382	1.06583	0.948718	0.968224	0.253888
			0.65668	2.26156	1.16716	0.306461	1.29255	0.759259	1.04925	0.453479
			1.01358	2.19612	0.969986	0.316327	0.813688	1.39788	1.06269	0.340941
			0.82543	2.31939	1.45711	0.412855	1.31815	1.5	1.14915	0.357522
			1.24495	2.22843	1.66069	0.369939	1.02382	0.967427	1.10166	0.332892
			0.961838	2.40364	1.15742	0.372849	1.14325	1.07034	0.980227	0.401415
			0.96628	2.19647	1.08916	0.408057	1.77466	1.25794	1.10629	0.478271
			0.941229	2.00437	1.26486	0.434023	1.34391	0.889121	0.84847	0.408148
			0.995823	2.69815	1.00902	0.606366	1.38889	0.872521	0.836201	0.433012
			0.693927	1.92376	1.11888	0.562796	1.51563	1.13202	1.00785	0.407477
			1.14087	2.39401	1.79948	0.444793	0.99195	0.975	1.00128	0.353348
			1.20259	2.67816	1.16013	0.395319	1.44428	1	1.04643	0.284331
			1.35796	2.61949	0.979671	0.408203	1.10419	1.0038	0.960621	0.526927
			1.42934	2.19946	1.15078	0.320794	1.09495	0.693333	1.0314	0.321684
			1.2608	2.15435	0.955671	0.431621	1.55738	0.762963	1.01075	0.394904
			1.45697	2.13855	1.25608	0.536177	2.51359	0.8325	1.01944	0.37831
			1.55061	2.40539	1.10889	0.569444	2.17302	0.680672	0.864868	0.277813
			1.45128	1.99716	1.47559	0.382942	3.42418	1.48387	1.09287	0.488195
			1.49428	2.06364	0.856081	0.273704	1.87971	0.658174	0.95216	0.376648
			1.30765	2.44063	0.97831	0.619242	2.10098	1.32641	0.991328	0.305579
			1.45592	1.98258	1.12543	0.303136	3.24957	0.073733	1.04465	0.375463
			0.872353	2.21602	1.283	0.363095	1.60134	0.086554	0.977237	0.469563
			1.46696	2.73909	1.33444	0.529851	1.85954	0.062707	1.02028	0.359473
			0.922509	2.12362	1.12568	0.39211	2.02239	0.075049	1.03885	0.442341
			1.37409	1.81592	1.44493	0.323723	1.3065	0.083212	0.924834	0.332955
			1.18538	1.0696	0.996193	0.567901	3.37883	0.068325	0.928554	0.437811
			1.42013	2.08641	1.07851	0.625731	1.71938	0.071941	1.15585	0.333398
			1.22701	2.59572	1.01223	0.650602	1.93789	0.069819	1.23026	0.431018
			1.39089	1.12046	0.768506	0.745863	1.42581	0.046841	1.30463	0.343096
			1.30974	1.71389	1.07081	0.695294	1.51298	0.075528	1.96183	0.36212
			0.914409	1.93939	1.27078	0.31467	1.87212	0.086698	1.57717	0.330798
			1.39429	1.98167	1.62037	0.637202	1.60865	0.073318	1.91447	0.410773
			1.14445	2.64855	1.3714	0.833841	1.80861	0.065311	1.18863	0.410488
			1.02499	2.11527	1.14657	0.732771	1.64976	0.072293	1.13842	0.344703
			1.17714	2.09162	1.06826	0.386895	1.71235	0.062657	1.78934	0.531326
			1.46831	2.65752	1.01218	0.506221	1.58574	0.069532	1.73589	0.377673
			1.41077	2.47414	1.1257	0.503809	3.02998	0.069676	1.54385	0.426698
			1.35141	2.11642	0.96181	0.68723	2.086	0.056611	2.08395	0.35
			1.17884	2.40306	0.977327	0.460299	2.46002	0.070848	1.30054	0.413676
			1.32213	2.22458	0.852476	0.662778	2.10247	0.059855	1.42212	0.442366
			1.5187	2.79415	1.04655	0.864505	3.22981	0.088391	0.926497	0.480564
			1.45615	2.15961	0.893557	0.243772	1.89322	0.062026	1.775	0.302026
			1.7026	2.15002	1.08227	0.286429	1.78243	0.075117	1.32511	0.359175
			2.30792	2.15716	0.993338	0.234527	1.83028	0.062383	1.27905	0.376523
			1.73192	2.20537	0.976619	0.280471	1.79491	0.067457	1.2671	0.293347
			1.81567	2.07565	1.05049	0.210454	1.7875	0.072818	1.41234	0.298819
			2.5025	2.05495	0.958258	0.177835	1.75996	0.072601	1.55292	0.275592
			1.81472	2.44887	1.01473	0.168822	0.838718	0.053267	1.69019	0.301663
			1.65332	2.67378	1.92975	0.247543	0.909592	0.064231	1.88189	0.345201
			1.88744	2.10295	2.31575	0.18961	0.523297	0.07621	2.03698	0.342982
			2.22134	2.27065	1.87944	0.252092	0.625995	0.063649	1.934	0.346983
			2.39479	2.40075	2.34265	0.193328	0.889364	0.077277	1.94319	0.29717
			2.67125	2.08611	2.32491	0.18714	0.712446	0.064667	1.63736	0.303157
			2.16389	2.48412	2.03026	0.263226	0.739645	0.07486	1.62199	0.689365
			1.99798	1.98319	2.30367	0.226753	1.05556	1.36	1.78188	0.640212
			1.89844	1.83882	2.22492	0.246969	0.425576	1.66221	2.05987	0.556083
			2.2083	2.52848	2.52431	0.196682	0.652094	1.29831	1.6072	0.698492
			2.21044	2.36371	1.99312	0.206301	0.648746	1.28512	2.1173	0.6215
			2.30677	2.55419	1.8264	0.232348	0.708443	1.14815	2.00052	0.592262
			1.88779	2.35838	1.86319	0.184969	1.05872	1.08214	1.58047	0.696361
			2.28774	2.16723	1.77562	0.201047	0.93305	1.625	1.55285	0.736066
			2.18879	2.17361	2.19082	0.242888	0.548399	1.4	2.19879	0.66681
			3.33647	1.84408	2.10035	0.207226	1.06539	0.994403	2.1172	0.514874
			2.20083	2.51561	1.95181	0.2526	0.834104	1.00885	1.65014	0.632019
			2.07944	1.63545	2.38739	0.17071	0.470775	0.899543	1.98852	0.731326
			1.43426	1.69317	1.4921	0.206985	1.21689	1.2167	2.02106	0.721814
			1.34882	2.89233	1.2318	0.260359	0.529289	1.05818	1.64006	0.85957
			1.44521	2.26801	1.70855	0.164366	0.658816	0.975779	1.43649	1.02458
			1.44459	2.62209	2.35434	0.253208	0.628646	1.21723	1.53327	0.670555
			1.38849	1.8808	1.99051	0.313588	0.79589	1.49575	1.39618	0.678707
			1.48735	2.95239	1.53913	0.165244	1.28099	1.27352	1.25931	0.932314
			1.59478	2.22255	1.66	0.190643	0.81228	1.69471	1.38937	0.665369
			1.62435	1.79755	2.43541	0.222368	0.593015	1.21951	1.39774	0.798097
			1.47448	2.67625	1.85065	0.168427	0.662543	1.49077	1.29563	0.741303
			2.01718	2.60197	1.75508	0.282674	0.483259	1.40637	1.43779	0.685799
			1.92922	2.73033	1.89568	0.17565	0.851981	2.48028	1.36476	0.582397
			1.31146	2.59992	2.19964	0.172414	0.821409	1.91589	1.2239	0.622492
			1.42878	2.78903	1.73513	0.356007	0.707268	1.33529	1.35181	0.57704
			1.61624	2.27271	1.45369	0.164928	1.0386	1.78624	1.31707	0.65519
			1.84624	2.52456	1.65257	0.208459	1.18829	1.22122	1.28514	0.758945
			1.62395	2.73736	1.54596	0.201012	0.593255	1.39664	1.44062	0.7019
			1.24627	1.99476	1.68646	0.203297	0.589777	1.26637	1.12676	0.598819
			1.6375	2.14456	1.87017	0.29282	0.497884	2.10176	1.29318	0.687926
			1.72068	1.97912	1.30884	0.198159	0.721239	1.36082	1.38446	0.62439
			2.05793	2.40755	2.06021	0.209586	0.975866	1.20779	1.25854	0.751186
			1.4848	2.42797	1.71804	0.23711	0.845139	1.59382	1.15305	0.678663
			1.42606	1.82388	2.54336	0.187563	0.79172	1.19438	1.31895	0.564004
			1.10807	2.17908	1.57976	0.167455	0.613208	1.53908	1.11864	0.735889
			1.36804	2.06892	2.05544	0.201659	0.76404	2.10714	2.3696	0.468122
			1.58397	2.41442	1.57274	0.227731	0.546453	1.37968	1.53292	0.809444
			1.53382	2.68465	2.30944	0.347655	1.10255	1.84757	1.71445	0.863578
			1.19848	2.52288	2.55844	0.211984	0.774898	1.75895	1.21452	0.797468
			1.2322	2.79368	1.42308	0.248613	0.830145	1.34888	2.03891	0.745098
			1.43981	2.70399	2.09868	0.173607	0.582932	1.29338	1.37917	0.691011
			1.39181	1.96898	1.72861	0.173077	0.467143	1.37037	1.13433	0.966942
			1.73042	3.22826	2.53744	0.196735	0.694933	1.55089	1.3659	0.92721
			1.21877	2.37685	1.68107	0.123188	0.749625	1.34766	1.26995	1.01839
			1.49208	2.24487	2.0234	0.233073	0.81427	1.25	1.68377	0.818554
			1.43929	2.20091	1.97048	0.244972	0.416609	1.36754	1.58286	0.886897
			1.9648	2.40336	2.16549	0.194301	0.392024	1.51026	1.36197	0.891147
			1.71492	2.23207	1.57071	0.291565	0.330486	1.33835	1.22591	0.77561
			1.89421	2.22512	2.07496	0.160377	0.303763	1.26693	1.07157	0.936
			1.80733	2.40769	1.7071	0.190031	0.32649	1.72305	1.18668	0.865
			1.65651	2.16638	2.23024	0.398426	0.314094	1.44834	1.26921	0.928135
			2.30569	2.0841	2.63905	0.248999	0.280366	1.4825	1.48798	1.05099
			1.68969	2.86892	2.20853	0.210313	0.314815	1.765	1.28227	1.15088
			1.86771	1.86328	2.14147	0.249912	0.232101	1.28261	1.2572	0.825746
			1.75867	1.80029	1.05388	0.235202	0.348504	1.23541	1.54613	0.828063
			1.75426	1.82331	1.33333	0.242208	0.223162	1.68136	1.19209	0.86087
			2.00216	2.09953	1.20454	0.253439	0.230804	1.56782	1.52342	0.878165
			1.77698	2.6647	1.60491	0.224806	0.320609	1.94969	1.48562	1.07212
			1.47063	2.23515	1.19864	0.268249	0.230442	1.4515	1.36261	1.10024
			1.7981	2.11386	1.25166	0.250306	0.274506	1.58486	1.72232	0.908397
			1.64732	2.44532	1.22029	0.258288	0.207071	1.49391	1.35879	0.94844
			1.56458	1.68248	1.29117	0.320496	0.235805	1.71875	1.14493	1.19163
			2.03746	1.86625	1.34143	1.36202	0.290165	1.25214	1.26096	0.920238
			1.89039	1.8091	1.52719	1.02791	0.306735	1.33511	1.16851	1.39859
			1.97602	1.54458	1.60483	1.06178	0.213773	1.51542	1.24664	0.871233
			1.87441	1.49285	1.93461	1.42725	0.377065	1.59169	1.26987	1.05682
			1.93898	1.65954	1.10926	1.10889	0.1395	1.46024	1.29787	0.759328
			1.61323	1.50733	1.44392	1.2	0.181687	1.18315	1.13877	0.738245
			1.66165	1.61277	1.6483	1.36905	0.332143	1.37136	1.38038	0.984127
			1.98764	2.18008	1.3151	1.41904	0.242372	1.26849	1.22684	0.872777
			1.68372	1.85246	2.13528	1.15398	0.285203	1.4551	1.35857	1.03945
			2.22239	1.86975	1.84839	1.05401	0.420526	1.19187	1.91401	1.06886
			2.06967	3.05957	1.23649	1.05085	0.280079	1.22358	1.35884	1.02907
			1.791	1.48597	1.16601	1.51809	0.243961	1.37081	1.28344	0.701493
			1.89242	2.26421	2.42963	1.09332	0.222163	1.26538	1.18149	0.837925
			1.8563	1.46558	1.39495	1.14482	0.280527	1.28186	1.21732	0.928177
			1.94796	2.64219	1.12089	1.13067	0.216903	1.31522	1.35667	0.861111
			1.6513	1.98052	1.62859	1.10923	0.193897	1.42302	1.26521	1.09735
			1.63722	1.52529	1.6216	1.54706	0.238046	1.40488	1.63512	1.25184
			1.83478	2.12828	1.63366	1.28173	0.219323	1.53829	1.71075	0.869439
			1.89059	2.03283	1.49164	1.02684	0.248575	1.54546	1.36818	0.938967
			1.85541	1.82546	1.68606	1.1479	0.30303	1.65741	1.31373	1.04865
			2.00685	1.63112	1.5694	1.09046	0.25689	1.85012	1.39705	0.911728
			2.00282	2.2044	1.92898	1.43204	0.272235	1.61966	1.20662	0.871477
			1.93944	2.22939	1.65804	1.19467	0.308874	1.18919	1.32742	0.915935
			2.23534	1.57659	1.74127	0.894775	0.29536	1.05418	1.44067	0.978227
			1.89546	1.63254	1.41945	1.18252	0.206171	0.914221	1.66599	1.10019
			1.97576	1.69743	1.6732	1.16652	0.273903	0.811947	1.24957	0.820611
			1.89264	2.14975	1.59976	1.19923	0.246471	0.242188	1.34463	1.01899
			1.85729	1.57207	2.08592	1.29242	0.33624	0.27993	1.36299	0.810939
			2.21679	1.9321	1.54597	1.4748	0.381095	0.430411	1.49977	0.914706
			2.06903	1.81562	1.34397	1.16711	0.380478	0.295284	1.36066	0.822978
			1.84253	2.09994	1.85054	1.28169	0.256106	0.327899	1.43925	0.793722
			2.1597	1.47397	1.5311	1.04878	0.386867	0.308854	1.64413	1.1117
			1.95386	1.53925	1.60138	1.08869	0.397356	0.249143	1.33522	0.824818
			2.33858	1.61084	1.87492	0.9325	0.352371	0.269276	1.49217	0.98188
			1.7779	1.53728	1.5814	1.21242	0.42659	0.254299	1.72781	0.832955
			1.44284	1.5729	1.27742	1.72663	0.400113	0.225092	1.17166	0.877125
			1.71047	1.90393	1.2399	1.31787	0.317429	0.332002	1.35424	1.38195
			2.03861	1.9009	1.27561	0.960471	0.434365	0.279429	1.45298	0.926564
			1.79706	1.71616	1.2874	1.35758	0.468111	0.331228	1.18744	0.777778
			1.50965	2.32971	1.43962	1.21751	0.333888	0.254456	0.984405	1.22372
			2.65591	1.58893	1.27526	1.38208	0.348162	0.328904	1.10173	0.874647
			2.08033	2.03679	1.45484	1.35379	0.398033	0.317073	1.06238	0.941109
			2.09265	1.83778	1.88381	1.12141	0.36074	0.327089	1.35411	1.30785
			1.68456	1.61961	1.33256	1.23401	0.346458	0.242275	1.93199	1.14887
			1.61933	1.77184	1.41183	1.19847	1.99215	0.321654	1.16018	0.737279
			1.89412	1.79397	2.07397	1.04651	1.68066	0.321068	2.47694	0.851667
			1.3597	1.52154	1.57022	1.10244	2.21875	0.312935	1.21002	0.809349
			2.36477	1.67176	2.26639	1.22294	2.45868	0.261874	1.89817	1.70808
			1.80665	1.58869	1.4841	1.01499	2.07186	0.313076	1.4552	1.18995
			2.06844	1.80232	1.22988	1.13389	2.47249	0.318149	1.555	1.11475
			1.94186	1.48511	1.3164	1.33152	1.16129	0.26055	2.03604	0.813008
			2.34195	1.71132	1.13433	1.10076	1.99604	0.277406	1.49925	0.875
			2.54768	1.54173	3.3659	1.05765	2.42251	0.227945	1.84049	0.853261
			2.5464	1.96691	1.26995	0.996277	2.00285	0.262238	1.76644	1.70857
			2.74132	1.6023	1.68377	0.94697	1.79872	0.300546	1.89944	1.68547
			2.37809	2.06234	2.58286	1.2543	2.07476	0.304828	1.93029	1.59375
			3.50059	1.61083	1.36197	1.36879	2.17904	0.302352	1.85859	1.68517
			1.87538	1.83451	1.22591	0.911598	1.96164	0.318123	1.55737	1.58248
			2.00908	2.36101	2.07157	0.900627	2.6783	0.43472	3.29674	1.29484
			1.98326	1.97277	1.18668	1.11492	3.55597	0.360629	2.62862	1.87008
			2.04463	1.49035	1.26921	0.976701	2.23372	0.310185	2.8621	1.65329
			2.11641	1.92571	1.48798	1.06367	1.97421	0.35839	2.89474	2.00975
			2.48629	1.68909	1.28227	0.929799	1.69565	0.273114	2.17422	1.60339
			2.50397	1.4264	1.2572	1.0169	2.39702	0.282534	1.90744	2.0041
			2.56569	1.92019	1.54613	0.864437	2.09867	0.303944	1.8129	1.63085
			2.39905	1.69345	1.19209	1.07892	2.32756	0.233145	1.94411	1.72065
			2.13039	1.69585	1.52342	1.20343	2.3031	0.371538	1.84428	1.43793
			2.35704	1.78886	1.48562	1.07016	1.59434	0.26867	1.81808	1.52068
			2.50202	2.29047	1.36261	1.31733	2.30743	0.282437	1.92284	2.17526
			2.03451	1.82817	1.72232	0.941288	2.08546	0.371589	2.38272	1.32474
			1.99417	1.87694	1.35879	1.28758	1.64384	0.251669	1.92791	1.71916
			1.58889	1.87526	1.14493	1.27432	1.73842	0.298718	2.71818	1.2276
			1.70532	2.18461	1.26096	1.27535	1.7648	0.258812	1.49427	1.1362
			1.73621	1.80263	1.16851	1.24909	2.0117	0.262573	1.72574	1.81793
			1.73298	1.74618	1.24664	0.927614	2.0613	0.270073	2.37889	1.60342
			1.72621	1.60786	1.26987	0.802292	1.97644	0.344362	1.85847
			2.61242	1.39897	1.29787	1.09166	1.0974	0.315612	1.69326
			2.53555	1.26744	1.13877	1.41606	1.77738	0.390769	1.72856
			2.23014	1.65236	1.38038	0.99435	1.6887	0.308553	2.14178
			2.53236	1.46986	1.22684	1.24217	1.90088	0.283251	1.76119
			1.44218	2.07582	1.35857	0.835249	1.67485	0.337037	2.29984
			1.7693	1.84997	1.91401	1.23203	1.14144	0.414634	1.69183
			2.03751	1.77162	1.35884	1.03122	1.56625	0.258721	1.59576
			2.15464	1.54459	1.28344	1.16059	1.63315	0.26644	1.90341
			2.6422	1.88117	1.18149	1.31727	1.9	0.272727	2.08623
			2.35651	1.61133	1.21732	1.33961	1.98745	0.300392	1.72186
			2.41961	1.34196	1.35667	1.24404	1.92897	0.351288	1.80085
			2.04205	1.30716	1.26521	1.27529	1.5873	0.295017	2.75383
			2.92136	1.66569	1.63512	1.32506	1.71429	0.250281	1.46588
			2.29486	1.45854	1.71075	1.21026	1.14286	0.269285	1.68718
			2.42914	1.57082	1.36818	1.21905	1.44281	0.358209	1.769
			2.61208	1.47702	1.31373	1.19506	1.92208	0.228346	1.48651
			2.18004	1.29024	1.39705	1.07759	1.50657	0.287918	1.69718
			2.30485	1.83464	1.20662	1.54157	2.10086	0.330097	1.99653
			2.66331	1.39268	1.32742	1.20577	1.5092	0.409235	1.86639
			2.56815	1.32088	1.44067	1.28308	1.41801	0.28257	1.75613
			2.14784	1.55263	1.66599	2.09696	2.30233	0.293262	1.71316
			2.58864	1.47213	1.24957	1.31763	1.30045	0.30025	1.69271
			2.00508	1.34868	1.34463	0.878736	1.93664	0.371473	1.59021
			2.07512	1.30883	1.36299	1.24713	2.24927	0.287843	1.46273
			2.16246	1.5656	1.49977	0.971698	1.7971	0.284628	1.36475
			2.17958	1.19103	1.36066	1.14108	1.95627	0.316153	1.8099
			2.18839	1.36138	1.43925	1.24876	1.78333	0.248261	1.90839
			2.96381	1.71432	1.64413	1.28689	2.26899	0.277806	1.73457
			1.86495	1.92717	1.33522	1.31675	1.85653	0.346542	1.51647
			1.81988	1.29927	1.75552	1.04075	2.0504	0.234568	1.82318
			2.7027	1.66318	1.76825	0.991573	1.37143	0.30268	1.89555
			1.85064	1.4029	2.73154	1.06104	1.90741	0.331538	1.35164
			1.88976	1.34915	2.62709	1.43902	2.0649	0.355114	1.22623
			2.07157	1.71739	2.66962	1.07446	1.54546	0.334286	1.64447
			1.89771	1.34308	1.76214	1.02536	1.7675	0.242056	1.33904
			2.28641	1.33997	2.80205	0.912621	1.55128	0.25977
			2.04392	1.24247	2.03807	1.1633	1.3539	0.316591
			2.04556	1.35795	1.63233	1.42	1.64425	0.268703
			2.2491	1.89728	1.89508	1.24307	1.54497	0.22788
			2.41734	1.56095	2.71827	1.38049	1.65689	0.298258
			2.1967	1.63913	1.68723	1.27669	1.35168	0.332418
			1.95437	1.3417	1.628	1.12221	1.35629	0.504268
			1.89644	1.15269	1.02414	1.08322	1.49491	0.352847
			1.86982	1.29199	1.35398	1.12202	1.49326	0.362205
			1.9327	1.34478	1.7029	1.03606	1.3955	0.402196
			1.67766	1.42326	1.76107	0.973379	1.56744	0.109033
			1.93777	1.8071	1.91687	1.11319	1.22571	0.505982
			1.19167	1.74223	1.85658	1.13879	1.13812	0.406977
			1.30823	1.62275	1.54331	1.26449	1.23529	0.627315
			1.32777	1.54645	1.45934	1.33663	1.3096	0.41092
			1.14312	1.95656	1.41199	1.27108	1.41259	0.474576
			1.18328	1.80135	1.83567	1.0958	1.51632	0.421053
			1.36615	1.45	1.88111	1.12684	1.56884	0.346888
			1.12885	1.24475	2.02342	1.25444	1.48262	0.620162
			1.18803	1.32465	1.49018	1.13772	1.4	0.467962
			1.28125	1.89119	1.90736	0.980832	1.16959	0.771654
			1.21905	1.75168	1.91632	1.00154	1.21849	0.530722
			1.4	1.33546	1.64282	1.35309	1.1448	0.391579
			1.49653	1.96496	2.07194	1.27138	0.956072	0.305094
			1.36326	1.53007	1.59593	0.998705	0.977199	0.300954
			1.63194	1.66284	1.6129	1.1801	1.52236	0.168767
			1.18461	1.51627	1.8323	0.35728	1.26212	0.213161
			1.2087	1.55033	2.14037	0.340586	1.51931	0.486635
			1.38583	2.29108	1.37491	0.503472	1.10625	0.267291
			1.22758	1.58149	1.64005	0.391555	1.19973	0.36053
			1.36662	1.78808	1.84215	0.346883	1.31049	0.354839
			1.15205	1.66352	1.55523	0.474383	1.11864	0.390923
			1.35986	1.47496	1.60134	0.437247	1.32102	0.59375
			1.33665	1.38838	1.85954	0.361564	2.11156	0.392662
			1.25	1.55725	2.02239	0.395161	1.3125	0.317699
			1.25379	1.36896	1.3065	0.438776	1.2008	0.196245
			1.81118	1.70202	3.37883	0.515238	1.44084	0.254509
			2.69581	1.25418	1.71938	0.403141	1.54206	0.199755
			1.79809	1.38066	1.93789	0.429907	1.17418	0.176587
			1.19078	1.88094	1.42581	0.340024	1.33266	0.227937
			1.25673	1.34784	1.51298	0.436728	1.42078	0.307087
			1.30444	1.74112	1.87212	0.446498	0.928767	0.28
			1.17881	1.93637	1.60865	0.539528	1.30283	0.319502
			1.15886	1.26281	1.80861	0.442308	1.41477	0.506757
			1.37453	1.79503	1.64976	0.540862	1.05825	0.46533
			1.27479	1.7267	1.71235	0.384615	1.33007	0.365931
			1.56677	2.12034	1.58574	0.387097	1.04138	0.216352
			2.01159	1.99301	3.02998	0.554348	1.27673	0.228684
			1.31619	1.81812	2.086	0.442871	1.4	0.204148
			1.19727	1.6286	2.46002	0.516358	1.19516	0.18747
			1.28545	1.76712	2.10247	0.47018	1.77667	0.258134
			1.16841	2.11955	3.22981	0.476112	1.32551	0.162029
			1.29205	1.91439	1.89322	0.468988	1.5	0.324415
			1.39539	2.34663	1.78243	0.443258	1.11927	0.22077
			1.30529	1.77884	2.09768	0.444698	1.28387	0.293923
			1.15702	2.23153	2.62807	0.287356	1.20968	0.305478
			1.29808	2.05086	3.22143	0.362928	1.1935	0.29038
			1.10325	2.14962	2.65589	0.51444	0.986333	0.218372
			1.6147	1.82213	1.61873	0.410167	0.921311	0.676226
			1.20156	1.91111	2.28824	0.479478	0.771978	0.260223
			1.17537	2.05307	0.715929	0.414405	1.07431	0.304556
			1.80608	2.85018	1.0004	0.426003	1.51587	0.19943
			1.39967	1.95982	0.897871	0.469136	1.01482	0.312932
			2.02635	2.47883	0.775328	0.411914	0.933333	0.35793
			2.56002	2.35805	0.931153	0.478088	1.86746	0.494624
			1.70732	2.18368	0.728663	0.609756	1.93515	0.31012
			1.77231	1.97139	0.959142	0.347222	2.24203	0.231749
			2.12299	2.28574	0.675365	0.613757	2.49166	0.414973
			2.78184	2.21465	0.69311	0.627247	1.20327	0.409492
			2.66395	1.87232	1.15619	0.569767	1.06695	0.440044
			1.6464	2.26519	2.62598	0.60241	0.968511	0.402823
			1.13254	1.9313	1.73033	0.461234	1.05901	0.150109
			1.37335	2.23577	2.87857	0.470588	0.882756	0.243697
			1.16312	2.9386	1.88849	0.508501	1.09309	0.365854
			1.22159	1.87977	0.986786	0.575	1.26228	0.45
			1.5808	2.05294	1.71618	0.556689	0.890732	0.311074
			1.1955	2.1006	0.78023	0.377273	1.0044	0.329329
			1.39292	2.02059	2.53279	0.512857	1.04378	0.433962
			1.18503	1.97561	1.24143	0.428099	0.880135	0.432504
			1.29779	2.68841	1.04843	0.631268	0.922994	0.305692
			0.717084	2.81043	0.996226	0.598315	0.989476	0.777202
			0.8089	2.25351	0.836222	0.381008	0.961188	1.2847
			0.890765	2.13728	0.620272	0.416584	1.07754	1.09242
			1.83641	2.15162	0.91842	0.4111	0.99274	0.908932
			1.8984	2.02141	0.800306	0.724615	0.704675	0.692998
			1.99785	1.96982	1.14504	0.730721	0.898464	0.846045
			2.12679	2.19185	0.759697	0.436364	0.875375	1.01246
			1.89823	2.94427	0.901181	0.664865	0.775488	1.0777
			1.81786	2.40111	2.00889	0.836066	0.831169	1.20682
			1.9375	2.89421	1.8165	0.536164	0.806132	1
			2.34627	2.48717	1.18799	0.618421	0.802367	0.914149
			2.48718	2.36364	1.27421	0.610866	0.745272	0.977199
			2.45558	2.49728	2.48681	0.654676	0.787619	0.933599
			2.21528	1.7695	1.87029	0.368088	0.966829	0.874847
			2.57732	2.51049	1.88825	0.427114	0.743719	1.03025
			2.1853	2.90795	0.545776	0.457399	1.03333	0.801029
			1.59837	2.52136	0.962336	0.380098	0.824047	0.792768
			1.53967	2.14693	0.784654	0.639429	0.763231	0.787654
			1.96282	2.12873	0.951396	1.65812	1.07367	0.912857
			1.97447	2.54147	0.914351	1.58463	0.935791	1.10667
			1.55801	2.00966	1.10238	1.36124	0.668806	1.02489
			1.95691	2.66053	0.911949	1.55044	0.819106	0.986395
			1.63636	2.09738	0.871168	1.48023	0.758767	0.917135
				2.65542	0.955085	1.46212	0.739869	1.33465
				2.82951	0.777239	1.79311	0.687805	1.1534
				2.2925	1.04831	1.38075	0.834606	0.761518
				2.38281	1.08471	1.57255	0.879365	0.893648
				2.44562	2.0336	1.45099	0.758028	1.36037
				2.3373	2.71572	1.19729	1.01376	0.876471
				2.94432	2.88954	1.24267	0.642582	1.08201
				2.6151	1.13487	1.8827	0.893639	0.716033
				2.70331	0.710134	1.52974	0.877761	1.10377
				2.16642	0.969174	1.16822	0.722267	1.43345
				2.61444	0.772335	1.96072	0.846266	0.708487
				3.13358	2.64463	1.95687	0.696884	1.02
				2.54025	2.6182	1.53516	0.781369	1.00806
				2.51152	1.83636	1.28362	0.658993	0.965695
				2.12905	0.839413	1.754	0.867277	1.17248
				1.92912	0.985942	1.25713	0.834184	0.889085
				2.34163	1.01798	1.39369	0.934307	1.02849
				2.48421	1.01751	1.70091	0.737835	0.891501
				2.24026	0.793314	1.59774	0.794661	0.899382
				2.60113	0.817709	1.50608	0.823293	1.00697
				2.79162	0.747083	1.24653	0.690616	1.02513
				2.04652	1.11799	1.49487	1.02314	0.958453
				3.12887	0.957038	1.50019	0.777114	0.850975
				2.70638	0.802804	1.56053	0.751034	1.34438
				2.58352	0.820825	1.37912	0.902362	0.85
				2.40269	1.21912	1.02899	0.769841	0.937313
				2.4052	1.12317	1.57635	0.809484	0.875994
				3.23226	2.09768	1.37996	0.736602	1.17663
				2.61206	2.62807	1.46118	0.97474	1.00509
				2.73574	3.22143	1.50868	1.02737	0.761468
				2.14286	2.65589	1.17415	0.864975	0.981324
				2.24287	1.61873	1.43867	0.694421	0.827869
				2.01353	2.28824	1.37144	1.30894	0.889091
				2.32633	2.07293	1.81043	0.632159	0.838755
				2.75693	1.55443	1.40687
				2.56671	2.57047	1.33475
				2.55671	1.40651	1.496
				2.52797	1.76756	1.65646
				2.37826	1.92071	1.92117
				2.75923	1.25955	1.74849
				2.78144	1.30716	1.9925
				2.34056	1.3198	1.49774
				2.70747	1.48311	1.56636
				1.45231	1.45043	1.7846
				2.28497	1.81289	1.38247
				2.94169	1.62702	1.79113
				3.10366	1.32837	1.6913
				2.93411	1.69343	1.77838
				3.13787	1.7519	1.44606
				2.73459	1.3426	1.60389
				2.37593	1.22855
				2.09664	1.79018
				2.76608	2.80214
				2.62326	2.53535
				2.19533	3.19036
				2.96538	2.17488
				3.09175	2.53015
				2.58037	2.57673
				2.01251	1.9615
				2.12013
				2.58975
				2.49103
				2.85844
				2.46882
				2.29369
				2.89488
				2.31912
				2.2285
				2.20454
				1.90007
				1.27884
				1.91607
				2.03563
				1.38778
				1.34347
				1.45674
				1.97185
				1.12249
				1.66012
				1.39272
				1.53765
				1.45385
				1.46751
				2.11061
				1.54934
				1.77054
				1.36705
				1.95628
				1.69076
				1.72535
				2.07659
				1.50267
				2.35781
				1.92735
				1.69048
				1.46857
				1.8044
				1.55419
				1.65348
				1.6722
				1.74194
				1.69946
				1.72816
				1.37024
				2.89435
				2.07912
				2.04968
				1.95954
				1.88708
				2.13603
				2.61482
				3.30934
				2.89461
				2.63785
				2.27499
				2.84018
				2.40652
				2.57573
				2.38998
				2.85377
				2.94798
				2.7385
				2.86771
				2.99158
				2.72291
				1.88474
				3.20884
				3.14338
				2.70131
				3.22087
				2.95658
				2.41359
				3.01729
				2.48776
				2.00334
				3.13107
				3.04629
				3.30942
				3.16453
				2.82086
				3.28265
				2.02305
				2.6386
				1.9878
				2.31058
				2.79001
				2.50197
				2.59603
				2.57716
				1.96081
				2.434
				2.04902
				2.40274
				2.12239
				2.55067
				2.25851
				2.36323
				1.98774
				2.40896
				2.26581
				1.93389
				2.38047
				2.76121
				2.38354
				2.65288
				2.21467
				2.218
				2.16893
				2.64846
				1.92535
				2.2302
				2.09502
				1.13926
				1.04053
				1.247
				1.24028
				1.47344
				1.1601
				1.3573
				1.25262
				3.84157
				1.90203
				2.42515
				3.66005
				2.3137
				1.99219
				2.32751
				3.03424
				2.58843
				2.74759
				2.9056
				2.19947
				3.23714
				3.34962
				2.9837
				2.84405
				3.36131
				3.09748
				3.00686
				2.60243
				2.76353
				2.33443
				4.15487
				3.44635
				2.66983
				2.7054
				3.00177
				3.12888
				2.07584
				2.2216
				3.4253
				2.83975
				2.12871
				1.91106
				2.47619
				3.01744
				1.96425
				2.14442
				2.40471
				3.01016
				2.54393
				2.53938
				2.596
				2.42282
				2.99628
				2.7316
				2.09499
				2.32785
				1.9304
				1.8838
				2.29303
				3.13562
				2.12001
				2.29467
				2.13415
				2.50148
				2.02248
				2.2558
				1.78435
				1.99295
				2.36793
				1.80236
				1.93859
				1.51839
				2.24731
				1.59565
				1.72008
				1.89569
				1.84349
				1.72747
				1.71903
				2.58362
				2.20962
				1.89021
				2.07233
				2.0528
				2.38126
				1.91923
				1.96452
				1.97629
				2.03479
				2.07435
				2.40401
				2.99326
				1.90567
				1.81322
				2.31941
				1.9693
				1.91182
				2.03555
				1.98419
				2.71645
				1.95089
				1.78271
				1.994
				2.36806

## Sheet: Figure 8M-isp-1;hif-1
		isp-1;hif-1 vs isp-1
	lysosomal genes	relative mRNA level of lysosomal genes			Mean	SD
	vha-8	1.34853	1.06313	1.24058	1.21741	0.144099
	ctsa-1	1.02101	1.45854	2.29558	1.59171	0.647639
	Y40D12A.2	1.2166	2.62818	1.24865	1.69781	0.805883
	asp-4	0.94028	0.700843	1.68092	1.10735	0.510949
	asp-8	0.584918	0.286092	0.494747	0.455252	0.153278
	cpr-8	1.38519	2.23318	1.60653	1.74164	0.439842
	asm-1	2.2233	1.21498	2.21841	1.88557	0.58075
	sul-3	2.05938	2.31893	3.38211	2.58681	0.700874
	Y105E8B.9	2.64403	2.22794	3.16086	2.67761	0.467368
	lipl-7	2.49227	4.64765	4.74013	3.96002	1.27195
	The numerical data are analyzed by GraphPad Prism 6 and represented as a bar graph in Figure 8M.

## Sheet: Figure 8R-pHtomato
		Average intensity of pHtomato
		WT	isp-1	hif-1(ia4)	isp-1;hif-1
		38.22	35.17	64.92	51.91
		54.41	69.1	62.29	59.27
		34.45	37.64	94.89	26.94
		37.75	53.47	113.15	41.56
		47.62	63.45	100.02	36.47
		42.21	32.97	101.47	29.29
		45.01	45.03	116.72	30.35
		33.83	43.64	98.31	66
		35.4	63.59	109.05	72.18
		71.74	58.51	132.92	29.92
		36.76	50.11	116.48	36.58		The numerical data are analyzed by GraphPad Prism 6 and represented as a bar graph in Figure 8R.
		35.83	55.19	64.08	44.79
		47.32	32.84	93.05	49.85
		39	76.44	91.7	35.88
		36.42	55.63	78.78	40.38
		42.54	42.12	124.91	37.27
		40.93	32.97	79.59	47.22
		34.29	39.71	81.67	46.69
		37.87	52.05	77.92	25.72
		55.78	30.5	59.18	56.39
		42.26	39.57	71.5	27.09
		68.14	49.41	68.8	31.5
		73.52	43	69.46	32
		87.17	62.52	83.19	66.48
		53.3	57.28	67	25.25
		85.56	35.55	73.88	36.13
		36.56	59.3	131.35	34.72
		34.92	45.78	105.36	35.81
		42.42	46.88	70.23	46.79
		51.08	64.61	85.26	28.14
		39.46	40.78	119.46	69.13
		90.62	64.69	130.87	28.79
		49.18	63.26	111.57	26.17
		35.93	43.65	96.57	87.1
		38.85	54.5	77.1	38.19
		39.84	29.86	79.65	25.16
		39.01	32.2	59.45	31.83
		41.98	58.03	89.19	27.76
		42.42	38.42	63.58	55.5
		55.61	43.23	93.76	55.39
		38.48	46.77	108.46	24.17
		40.39	43.6	74.61	53.05
		41.82	57.52	100.39	39.46
		49.41	67.84	69.75	31.26
		37.73	65.23	82.48	43.08
		33.7	32.24	84.26	36.38
		57.66	38.25	71.17	49.81
		34.46	33.83	64.4	42.7
		43.33	42.08	64.03	29.75
		45.19	42.67	70.39	31.54
		37.24	32.59	96.95	45.32
		56.76	40.38	102.22	35.53
		34.09	34	97.35	31.2
		34.44	41.38	86.57	37.59
		37.79	34.31	84.25	49.84
		40.71	33.51	75.4	28
		93.83	60.24	111.3	66.76
		79.74	52.41	159.43	57.83
		95.49	37.09	67.94	46.37
		66.18	37.49	71.2	24.14
		62.14	43.74	97.89	32.5
		81.44	35.79	67.44	47.95
		100.7	40.6	149.1	27.46
		77.48	54.31	70.76	26.08
		68.71	38.79	117.63	40.56
		83.43	56.74	113.61	36.56
		60.83	36.71	78.48	32.98
		58.46	62.06	66.18	28.06
		61.67	32.82	75.84	27.83
		74.23	56.73	125.96	46.73
		64.1	49.12	123.55	38.14
		63.91	47.73	61.31	41.43
		69.18	28.67	110.64	51.91
		100.97	40.59	59	46.63
		74.28	48.55	93.24	46.54
		58.31	29.56	79.23	33.15
		63.57	54.05	80.57	36.87
		76.2	76.25	96.55	36.54
		57.46	72.22	75.63	31.9
		63.69	67.09	144.35	27.59
		65.73	70.5	56.68	26
		62.18	57.89	124.25	37.56
		61	55.09	84.13	24.14
		84.74	59.63	85.63	29.47
		76.21	74.15	67.52	39.91
		62.38	50.02	82.96	43.19
		73.87	38.52	67.13	49.61
		117.62	60.64	80.31	34.78
		70.66	42.65	109.4	30.44
		105.89	38.36	140.92	33.4
		151.89	38.73	154.73	38.32
		63.09	35.58	117.16	49.35
		78.47	38.14	112.3	59.93
		56.92	69.19	110.11	32.75
		69.96	42.3	164.39	37.17
		129.7	36.33	96	31.5
		60.15	34.7	146.06	33.89
		100.82	44.68	130.13	25.83
		70.24	32.8	138.41	30.48
		111.9	38.3	95.86	55.69
		123.85	41.8	101.73	49.01
		151.62	37.33	139.32	66.61
		66.2	33.77	128.66	52.06
		91.05	38.53	132.88	42.67
		97.56	40.52	107.86	58.04
		58.82	53.23	126.18	57.62
		75.54	45.46	103.46	43.08
		71.04	38.77	86.1	67.74
		102.32	37.71	125.17	84.16
		63.79	44.73	169.1	81.74
		61.89	58.99	160.45	57.63
		67.89	45.87	119.88	93.32
		80.65	42.14	166.23	40.77
		63.28	43.02	125.17	105.57
		64.91	32.5	151.52	66.55
		143.7	79.17	90.3	54.38
		73.79	93.78	144.16	105.42
		66.95	122.7	120.83	60.81
		83.85	134.88	80.1	52.86
		74.39	129.47	98.93	61.07
		71.76	76	94.09	50.58
		27.23	65.47	105.8	57.6
		24.43	88.47	134.95	52.71
		25.52	111.1	139.63	47.67
		39.04	153.42	79.2	68.19
		20.94	82.39	125.78	85.94
		41.7	74.48	99.55	80.54
		21.55	144.39	154.33	69
		34.4	123.57	117.03	76.37
		21.2	135.53	140.33	68.51
		30.38	99.08	99	85.28
		24.8	98.71	154.43	62.13
		23.13	79.78	161.52	91.74
		24.86	132.17	147.27	110.21
		75.61	134.3	163.28	70.36
		24.5	116.25	143.09	66.04
		22.65	141.11	105.94	86.23
		27.59	131.91	88.86	93.47
		28.87	74.28	89.54	76.25
		35.02	57.94	136.65	144.41
		32.25	103.5	108.09	100.23
		38.77	60.86	123.48	143.44
		31.58	66.55	88.33	66.12
		28.16	80.13	124.31	48.31
		36.55	89.59	186.13	73.21
		25.7	85.97	167.15	79.08
		41.1	85	117.3	88.22
		31.35	93.83	124.52	65.94
		21	110.76	135.02	55.27
		29.54	91.38	209.61	80.04
		19.8	98.54	184.42	65.58
		30.16	72.09	141.86	54.82
		31.09	62.18	205.34	58.23
		39.57	130.26	193	41.27
		28.94	126.4	192.14	54.87
		26.75	103.58	94.12	74.18
		32.37	89.38	117.71	73.55
		34.54	63.73	107.07	61.87
		31.62	75.04	157.34	48.65
		30.46	59.52	188.12	84.39
		20.22	118.13	163.59	52.3
		33.89	77.52	128.1	45.88
		36.75	94.74	174.58	68.96
		21.9	82.35	212.84	71.53
		43.7	66.36	151.89	48.91
		22.69	60.91	207.22	51.33
		21	115.28	133.32	77.38
		24.67	46.42	197.54	43.36
		43.02	71.74	114.54	40.81
		31.03	52.62	120.74	74
		27.95	50.92	164.1	66.96
		33.02	72.07	121.56	47.22
		22.29	99.71	134.53	61.11
		31.82	92.08	190.63	55.29
		22.93	48.4	180.72	41.8
		92.89	52.12	111.06	58.46
		76.86	57.8	110.82	41.1
		96.14	65.21	193.28	66.24
		75.6	64.14	171.78	57.71
		144.3	49.33	170.07	54.85
		81.22	73.35	134.8	54.13
		108.83	58.77	127	45.71
		97.41	121.64	146.64	100.94
		162.02	56.42	99.8	60.06
		108.71	67.62	169.13	56.5
		80.66	58.93	133.78	72.4
		139.34	49.4	196.31	47.2
		78.88	86.8	170	74.48
		110.28	112.97	139.74	85
		74.05	70.77	164.91	59.7
		131.02	102.91	180.88	62.38
		110.95	72.4	176.35	82.58
		70.12	76.97	112.19	77.61
		67.07	107.53	182.42	43
		117.56	63.39	142.24	45.67
		70.64	60.05	135.15	56.23
		162.94	67.15	153.18	58.03
		72.56	81.51	142	105.86
		72.34	52.14	126.56	69.12
		78.23	64	137.76	70.27
		139.59	51.94	106.29	65.88
		122.24	93.53	110.42	44.37
		135.69	45.9	156.1	86.48
		118.62	59.9	175.02	42.21
		128.04	60.33	95.33	54.48
		83.9	111.53	140.99	52.44
		122.93	56.88	156.93	87.42
		74.79	53.56	123.38	68.98
		93.62	72.76	104.33	92.37
		70.38	53.09	148.33	41.89
		188.94	49.61	179.43	56.03
		71.83	61.92	186.76	58.97
		86.18	54.5	203.81	51.4
		142.06	58.21	186.05	45.25
		152.7	56.6	132.94	70.38
		120.72	57.15	106.23	93.64
		92.5	69.67	204.1	78.87
		101.35	53.91	190.13	72.08
		109.28	85.79	199.54	128.7
		73.75	62.77	194.39	174.29
		71.85	81.81	154.84	94.68
		69.85	100.43	189.29	78.62
		71.91	90.94	122.54	158.63
		184.31	53.42	147.97	143.18
		96.11	71.94	102.25	73.2
		110.6	82.52	137.63	123.85
		106.73	56.75	152.5	130.46
		67.17	51.23	124.5	92.34
		80.06	51.3	116.97	99.13
		66.55	53.27	207.04	139.57
		70.16	47.54	90.35	67.82
		68.71	38.27	186.61	149.12
		65.67	44.61	179.77	147.9
		66.92	39.33	101.8	137.85
		65.46	36.73	156.16	113.79
		64.18	33.67	153.32	91.07
		64.29	38.19	195.79	110.7
		127.3	40.9	147.02	105.64
		70.44	39.06	100	106.33
		81.79	39.56	134.78	191.86
		114.75	41.25	173.95	86.08
		149.63	32.55	148.16	149.2
		73.57	52.45	156.05	79.25
		64.5	37.63	213.57	110.22
		65.69	48.34	173.45	92.71
		69.2	47.75	203.82	81.73
		150.1	39.3	162.44	94.38
		95.08	64.94	151.24	79.24
		67.32	36.31	125.13	71.2
		76.17	58.77	194.5	70.67
		106.03	56.27	142.75	82
		83.06	67.48	142.81	99.63
		64.17	45.68	195.21	128.72
		114.37	36.25	177.73	91.78
		94.08	53.36	182.04	67.06
		130.14	76.34	151	77.07
		106.22	30.53	158.3	74.56
		94.97	58.47	182.89	149.54
		122.64	39.2	180.66	75.04
		84.5	37.4	211.13	67.3
		116.35	52.38	204.48
		88.49	44.03	127.63
		67.92	30.76	154.11
		111.92	54.64	120.65
		68.71	42.18	181.31
		126.75	61.32	134.94
		151.01	63.7	167.13
		102.82	37.5	220.66
		82.57	37.17	184.35
		98.38	51.24	185.91
		107.25	74.03	187.16
		147.15	40.4	219.61
		93.21	56.66	188.07
		128.89	59.18	215.11
		135.23	37.82	208.35
		104.81	41.62	145.77
		94.14	53.17	225.69
		83.48	56.55	221.88
		141.42	35.28	200.25
		75.66	47.14	25.71
		67.72	47.96	31.09
		150.21	66	46.19
		92.26	37.4	30.2
		74.72	52.43	31.92
		67.81	64.19	34.23
		57.64	41.69	25.71
		61.47	29.5	47.38
		60.18	33.58	26.08
		87.22	40.21	32.75
		63.27	44.71	23.93
		66.29	50.48	37.12
		69.72	45.39	21.69
		97.88	33.33	32.72
		108.61	33.39	26.07
		78.72	40.08	53.56
		132.98	43.79	41.47
		125.05	54.73	36.88
		92.68	33.1	28.91
		95.4	31.56	24.83
		80.57	48.88	31.94
		67.63	48.36	21.17
		144.62	49.31	23.67
		80.16	45.57	29.52
		78.19	42.9	52.47
		108.54	37.43	28.77
		89.58	60.15	26.92
		127.59	55.78	26.05
		69.05	42.94	26.94
		97.63	60.51	43.26
		70.71	41.39	39.65
		86.52	63.32	55.05
		105.68	71.56	80.9
		92.48	72	38.47
		92.35	73.24	60.06
		101.88	73.7	53.08
		64.76	68.28	86.4
		151.98	81.78	44.64
		96.79	47.86	130.61
		84.63	37.3	63.04
		101.24	101.06	56.57
		70.46	87.19	42.89
		69.54	62.85	61.55
		72.21	62.47	102.19
		84.55	78.52	43.46
		80.12	95.83	95.81
		76.62	39.37	42.88
		63.36	51.94	67.81
		79.29	49.75	61.08
		72.18	92.85	79.31
		85.45	63.42	44.35
		67.54	51.06	87.53
		115.21	77.17	44.31
		95.2	48.27	49.19
		79.89	48.37	61.88
		71.29	44.04	61.87
		76.64	70.36	66.68
		63.71	83.65	76.56
		71.85	80.67	72.43
		116.43	40.7	42.18
		68.56	86.98	56.98
		61.14	47.73	89.01
		77.67	74.61	43.84
		94.95	44.71	36.21
		65.06	35.38	44.64
		93.65	41.35	44.6
		62.63	50.44	46.43
		82.34	75.05	45.41
		80.46	42	38.39
		108.59	46.95	35.7
		71.36	53.98	34.93
		96.16	48.71	35
		137.48	42.18	52.16
		72.11	48.8	39.36
		55.67	47.07	55.48
		60.27	58.78	46.89
		73.4	44	37.4
		146.52	73.35	40.25
		65	50.23	49.38
		100.92	46.81	41.19
		82.37	44.41	55.41
		68.2	48.83	89.15
		79.56	39.4	69.74
		65.18	52	70.45
		69.83	49.81	82.9
		69.72	43.88	97.62
		65.44	48.83	101.82
		63	36.45	47.67
		152.26	42.4	57.72
		98.08	49.53	81.4
		103.42	87.14	46.28
		85.68	52.91	51.06
		77.92	49.92	64.45
		58.08	50.67	118.7
		85.83	61.26	72.21
		144.73	47.4	84.55
		103.65	48.88	80.12
		101.67	48.36	76.62
		111.21	49.31	63.36
		108.07	45.57	79.29
		128.12	42.9	72.18
		125.89	37.43	85.45
		73.38	60.15	67.54
		66.66	55.78	115.21
		95.85	42.94	95.2
		66.4	60.51	79.89
		106.91	41.39	71.29
		112.71	63.32	76.64
		89.02	71.56	63.71
		58.21	72	71.85
		95.78	73.24	116.43
		85.81	73.7	68.56
		77.07	68.28	61.14
		111.76	81.78	77.67
		88.67	47.86	94.95
		102.41	37.3	65.06
		84.5	101.06	93.65
		61.83	87.19	62.63
		63.1	62.85	82.34
		94.92	62.47	80.46
		124.65	78.52	108.59
		63.38	95.83	71.36
		71.5	39.37	96.16
		96.58	51.94	137.48
		100.48	49.75
		96.4	92.85
		66.13	63.42
		81.77	51.06
		142.06	77.17
		71.17	48.27
		77.44	48.37
		170.35	44.04
		115.71	70.36
		172.63	83.65
		149.49	80.67
		79.56	40.7
		84.36	86.98
		150.53	47.73
		156.73	74.61
		161.33	44.71
		101.12	35.38
		92.8	41.35
		171.42	50.44
		116.41	75.05
		106.09	42
		118.04	46.95
		155.24	53.98
		108.65	48.71
		146.75	42.18
		141.17	48.8
		118.39	47.07
		95.65	58.78
		108	44
		114.13	73.35
		98.94	50.23
		149.57	46.81
		111.79	44.41
		84.1	48.83
		97.62	39.4
		50.94	52
		93.71	49.81
		52.78	43.88
		81.19	48.83
		53	36.45
		95.91	42.4
		95.2	49.53
		107.57	87.14
		46.96	52.91
		61.74	49.92
		138.64	50.67
		45.6	61.26
		49.37	47.4
		85.46	75.82
		74.4	92.61
		79	124.13
		55.45	103.94
		64.79	96.47
		90.54	65.63
		88.32	75.6
		90.41	108.39
		53.45	72.85
		99.85	89.55
		71.17	113.48
		73.49	95.55
		95.3	86.5
		65.34	141.75
		45.53	139.41
		81.34	92.45
		63.47	95.15
		74.12	110.31
		94.43	131.61
		100.41	111.87
		94.38	90.27
		55.74	144.73
		54.24	122.22
		73.57	84.19
		64.21	83.36
		61.2	70
		50.47	84.27
		79.34	151.43
		59.39	67.07
		58.9	139.38
		86.28	86.58
		70.68	143.53
		123.83	112.87
		126.48	69.33
		51.63	91.16
		66.77	120.92
		62.32	86.05
		63.7	136.88
		91.25	67.08
		67.5	121.73
		116.68	85.32
		117.43	76.9
		154.64	103.69
		182.84	102.23
		170.87	87.31
		176.03	76
		168.24	70.91
		114.07	71.57
		130.27	169.96
		124.31	108.92
		186.13	136.45
		167.15	67.46
		117.3	96.04
		124.52	86.78
		135.02	154.47
		209.61	162.29
		184.42	119.71
		141.86	112.48
		205.34	82.81
		193	141.09
		192.14	101.48
		94.12	95.7
		117.71	104.58
		107.07	137.52
		157.34	95.24
		188.12	77.1
		163.59	88.5
		128.1	155.2
		174.58	68.68
		212.84	64.62
		151.89	88.48
		207.22	98.25
		133.32	87.65
		197.54	86
		114.54	79.45
		120.74	85.21
		164.1	105.76
		121.56	105.31
		134.53	67.18
		190.63	108.42
		180.72	80.25
		111.06	82.5
		110.82	95.63
		193.28	95.88
		171.78	119.88
		170.07	99.72
		134.8	91.53
		127	77.45
		146.64	73.84
		99.8	104.86
		169.13	95.17
		133.78	145.97
		196.31	91.89
		170	84.33
		139.74	88.27
		164.91	81
		180.88	59.76
		176.35	156.11
		112.19	120.27
		182.42	106.94
		142.24	82.88
		135.15	88.81
		153.18	114.57
		142	114.02
		126.56	87.62
		137.76	104.6
		106.29	98.17
		110.42	120.8
		156.1	93.25
		175.02	161.96
		95.33	97.62
		140.99	105.51
		156.93	62.64
		123.38	118.47
		104.33	76.83
		148.33	84.36
		179.43	85.91
		186.76	66.83
		203.81	101.4
		186.05	85.25
		132.94	131.83
		106.23	77.87
		204.1	83.34
		190.13	96.86
		199.54	76.98
		194.39	83.07
		154.84	78.79
		189.29	132.43
		122.54	95.63
		147.97	93.79
		102.25	94.14
		137.63	75.71
		152.5	65.5
		124.5	69.59
		116.97	107.53
		207.04	67.5
		90.35	98.88
		186.61	74.1
		179.77	73.13
		101.8	82.7
		156.16	95.87
		153.32	78.06
		195.79	124.21
		147.02	99.64
		100	102.58
		134.78	87.53
		173.95	113.38
		148.16	87.43
		73.36	138.65
		87.03	115.96
		78.21	99.11
		71.54	69.76
		75.4	104.77
		67.82	78.86
		72.07	66.69
		96.69	129.2
		94.47	105.31
		96.55	91.75
		76.93	80.88
		106.48	63.5
		100.33	63.73
		64.1	38.83
		62.81	38.57
		86.03	37.63
		65.77	36.25
		67.25	47.17
		57.66	66.29
		52.58	45.26
		78.64	44.8
		103.05	41.8
		70.79	29.67
		129.77	30.62
		94.36	34.8
		119.57	46.43
		95.43	27.09
		95.73	37.94
		52	53.42
		99.42	26.6
		104.68	29.6
		55.88	51.66
		109.43	43.21
		74.35	25.74
		93.41	32.38
		109.81	44.71
		91.69	43.7
		40.42	36.92
		39.71	39.77
		53.33	30.43
		40.33	44.68
		28.81	24.87
		44.32	31.96
		79.85	36.22
		29.2	46
		35.27	42.41
		84.31	59.38
		52.55	37.48
		40.31	25.9
		37.83	44.32
		62.8	26.7
		48.71	37.05
		57.57	58.55
		41.9	38.83
		49.91	27.8
		44.08	45.08
		61.74	45.49
		49.62	37.04
		57.09	31.1
		38.78	38.09
		45.03	36.42
		41.48	28.91
		32.93	37
		46.87	25.4
		29.24	34.06
		45.36	38.41
		51.74	28.67
		45.82	46.36
		30.36	27.88
		35.6	74.86
		34.58	25.29
		29.9	34.27
		38.8	34.36
		38.55	46.96
		49.56	33.24
		44.05	28.69
		33.32	31.67
		34.12	39.84
		30.83	49.89
		41.69	32.31
		39.69	43.21
		62.38	32.21
		36.29	26
		37.26	28.05
		45.4	39.48
		45.63	28.45
		31.87	26.69
		37.05	54.36
		89.53	63.91
		95.65	39
		109.09	38.77
		153.52	28.46
		138.93	28.91
		103.94	47.49
		197.96	37.97
		106.63	37.99
		96.58	29.35
		83.3	25.3
		111.63	35.41
		144.74	42.63
		93.53	31.85
		180.75	35.55
		98.35	46.76
		96.14	43.35
		92.87	40.23
		167.17	27
		120.06	44.02
		80.95	60.95
		183.73
		154.53	23.35
		196.08	23.36
		102.69	20.2
		178.84	24.88
		181.69	30.08
		128	21.24
		88.25	25.67
		186.71	21.19
		109.57	24.18
		80.5	40.3
		87.21	23.66
		116.82	29.93
		108.52	30.34
		193.01	23.35
		119.39	26.93
		85.53	29.99
		174.27	21.32
		112.27	33.4
		189.48	42.38
		121.6	39.27
		105.52	28.62
		167.31	27.02
		111.93	27.16
		175.13	38.04
		141.89	19.85
		122.86	30
		184.39	59.55
		106.81	21.45
		112.47	25
		104.46	24.97
		99.63	26.13
		147.14	26.9
		131.65	36.26
		139.25	21.55
		106.12	28.66
		105.61	33.17
		114.29	28.3
		98	34
		167.64	38.27
		113.3	33.63
		176.65	29.92
		123.07	52.8
		181.94	49.19
		99.57	31.71
		187.46	56.62
		183	50.31
		79.04	29.99
		168.68	21.17
		150.08	22.08
		115.7	25.42
		188.98	32.53
		154.55	45.52
		179	37.93
		187.14	29.08
		180.86	29.2
		206.01	36.64
		148.1	30.74
		184.79	40.77
		114.52	34.43
		123.67	23.73
		107.35	24.81
		122	22.36
		90	26.56
		144.55	33.29
		158.98	23.94
		93	51.93
		99.16	46.63
		156.04	44.25
		139.45	27.9
		120.79	24.89
		92.44	24.44
		122.55	33.01
		85.75	28.33
		137.04	23.31
		99.08	36.88
		88.94	23.7
		88.4	37
		89.67	26.59
		116.44	32.96
		96.8	21.61
		92.05	25.69
		81.36	18.65
		93.85	20.25
		116.13	17.35
		86.7	27.84
		82.54	42
		156.05	22.28
		213.57	23.33
		173.45	25.93
		203.82	25.44
		162.44	24.77
		151.24	19.57
		125.13	17.91
		194.5	54.46
		142.75	30.05
		142.81	18.8
		195.21	28.91
		177.73	23.76
		182.04	22.74
		151	19.57
		158.3	18.18
		182.89	20.8
		180.66	32.32
		211.13	27
		204.48	32.85
		127.63	19.82
		154.11	19.3
		120.65	17.15
		181.31	21.76
		134.94	47.42
		167.13	32.66
		220.66	21.5
		184.35	21.06
		185.91	19.73
		187.16	40.99
		219.61	30.13
		188.07	19
		215.11	19.2
		208.35	19.64
		145.77	29.6
		225.69	16.73
		221.88	23.5
		200.25	25.05
		224.33	19.28
		167.05	19.92
		147.14	18.47
		139.43	21.69
		224.18	17.48
		201.05	19.55
		131.69	17.54
		188.45	27.6
		140.47	16.12
		178.44	15.89
		207.26	16.44
		211.76	27.07
		209.23	34.42
		137.55	28.82
		206.05	39.67
		138.14	26.75
		126.52	31.06
		102.82	35.61
		140.8	44.82
		174.68	60.98
		201.05	82.71
		142.5	36.31
		160.34	45.39
		188.48	36.71
		188.06	40.59
		166.76	34
		197.73	34.42
		138.88	35.95
		215.87	30.71
		181.08	36.93
		113.5	48.24
		203.69	38.39
		173.95	44.38
		202.49	52.57
		156.33	51.71
		165.79	64.08
		161.81	35.62
		170.15	42.91
		109.32	38.4
		186.07	40.84
		189.89	60.8
		157.94	37.17
		122.57	35.55
		123.9	31.25
		123.16	29.7
		170.4
		193.64
		132.05
		115.88
		195.11
		150.88
		170.81
		209.6
		189.44
		203.49
		197.06
		205.15
		219.96
		208.83
		201.42
		189.86
		142.35
		192.03
		231.78
		185.53
		172.3
		196.81
		130.63
		199.08
		132.2
		176.59
		188.21
		185.53
		213.96
		206.71
		177.49
		213.53
		214.41
		167.43
		131.24
		136.92
		164.35
		168.61
		178.03
		169.05
		188.18
		175.41
		209.42
		136
		190.15
		151.64
		227.31
		182.57
		167.76
		224.51
		151.95
		136.18
		175.41
		211.79
		191.04
		157.76
		185.11
		111.27
		161.36
		165.29
		144.88
		196.72
		204.21
		197.1
		193.72
		109.4
		105.54
		176.09
		216.29
		140.65
		199.16
		187.15
		121.08
		140
		128.2
		127.69
		157.47
		172.67
		112.87
		159.62
		176.88
		183
		168.93
		201.85
		162.24
		114.19
		165.15
		146.18
		132.35
		200.86
		187.47
		163.56
		120.9
		189.45
		183.55
		126.14
		174.59
		208.93
		202.47
		157.39
		152.29
		224.49
		147.26
		189.83
		220.43
		205.84
		224.46
		172.67
		195.05
		154.58
		205.13
		152.18
		230.9
		206.02
		120
		122.2
		143.41
		153.96
		132.92
		198.7
		180.33
		180.26
		172.7
		159.26
		173.88
		188.12
		120.42
		160.5
		175.19
		74.35
		66.89
		63.67
		58.14
		68.38
		64.1
		60.76
		76.93
		72.65
		76.91
		65
		76.16
		72.96
		57
		71.1
		94.74
		91.55
		72.83
		61.47
		86.34
		51.51
		85.19
		55.2
		136.74
		50.62
		70.72
		61.59
		78.38
		60.2
		74.13
		70.81
		86.46
		48.8
		64.24
		88.11
		115.97
		52.02
		63.67
		120.2
		135.13
		114.15
		64.86
		61
		67.74
		103.5
		93.92
		110.33
		100.96
		100.5
		84.19
		59.31
		72.18
		68.75
		72.43
		73.61
		56.55
		55.8
		109.89
		82.9
		110.84
		101.45
		107.56
		72.84
		73.49
		83.82
		72
		74.17
		102.23
		79.49
		100.87
		71.48
		72.3
		100.42
		65.3
		82.27
		117.89
		75.96
		61.73
		86.4
		102.04
		85.41
		86.02
		63
		93.79
		76.74
		79.32
		110.42
		62.14
		61.82
		169.37
		110.08
		113.5
		63.01
		104.4
		121.2
		118.7
		74.01
		96.06
		72.59
		71.43
		110
		59.33
		65.63
		53.92
		85.07
		62.42
		111.44
		120.52
		106.15
		116.49
		127.3
		138.06
		155.36
		153.19
		155.83
		185.35
		157.15
		98.95
		123.45
		96.67
		158.01
		89.08
		82.33
		123.67
		136.37
		138.8
		104.13
		98.55
		177.76
		147.38
		110.56
		86.69
		142.17
		88.86
		132.92
		93.81
		88.79
		109.45
		89
		92.52
		130.53
		128.8
		96
		98.17
		114.08
		98.21
		102.53
		92.4
		200.06
		154.92
		134.67
		151.96
		190.51
		159.1
		139.4
		168.05
		123.64
		159.07
		119.91
		130.63
		103.33
		12.64
		12.83
		9.88
		11.4
		10.09
		13.59
		12.96
		11.57
		13.91
		13.59
		25.27
		10.77
		11.48
		11
		11.95
		17.93
		10.4
		9.94
		24.81
		17.11
		12.51
		17.25
		13.94
		13.24
		16.24
		11.2
		17.15
		11.19
		16.14
		16.9
		12.31
		11.32
		9.42
		14.92
		13.66
		15.76
		12.07
		10.7
		10.83
		16.38
		21.54
		10.44
		10.56
		11.38
		16.73
		17.11
		15.54
		12.36
		10.87
		15.24
		36.57
		11.97
		14.71
		11.32
		16.76
		19.91
		20.05
		11.22
		12.92
		11.97
		24.85
		17.54
		15.27
		15.21
		9.45
		14.72
		15
		19.7
		20.98
		45.77
		25.79
		25.76
		19.6
		55.64
		18.36
		19
		27
		19.14
		29.28
		37.81
		22.93
		37.86
		19.28
		28.32
		21.19
		32.73
		27.31
		20.48
		22.14
		32.71
		29.95
		29.7
		20.79
		23.08
		27.87
		38.11
		22.7
		27.77
		29.51
		44.9
		23.15
		33.48
		26.78
		21.75
		20.6
