# Supplementary material for: Lysosome activity is modulated by multiple longevity pathways and is important for lifespan extension in C. elegans
Source: eLife. 2020 Jun 2;9:e55745. doi: 10.7554/eLife.55745 (PMC7274789; doi:10.7554/eLife.55745)
Supplement: Figure 9—figure supplement 1—source data 1. [file elife-55745-fig9-figsupp1-data1.xlsx]

## Sheet: Figure 9-S1M-Day 1 intensituy
	Mean intensity of NMY-2 at Day 1
	WT	cup-5	eat-2	eat-2;cup-5	isp-1	cup-5;isp-1
	9	11.8	19.8	29.2	14.8	23.6
	10.8	11.7	15.7	25.6	14	21.5
	11.2	14	9.9	21.4	11.9	23.7
	8.3	13.9	19	12	12.7	20.8
	11.5	12.6	16.6	22	13	21.4
	8.6	15.3	9	26.8	12.9	21.6
	13.8	13.3	14	14.4	13.8	17.3
	11	15.3	10	16.9	13	20.6	The numerical data are analyzed by GraphPad Prism 6 and represented as a bar graph in Figure 9-figure supplement 1M.
	12.66	12.5	10.4	19	15	18.5
	12.8	11	10.7	17	15	20.8
	6	10	14	23	15.6	22.5
	5	10	13	16	17	26
	6	13	4	13	16	13.4
	13	9	4	16	19	17.3
	10.6	9	10	24.6	23	17.7
	11.5	12	8	22.8	20	16.4
	13	9	14	21	21	24.3
	10	20.6	9	23.6	20	22
	14	15.5	10.9	16	20	25.3
	14	15.9	13	28	22	28.8
	11.5	13.2	16	25	23	23
	7	20	8	28.3	16	18.5
	10	23	7.6	26.3	15	16.5
	11.8	28.6	11.3	24.7	17	15.3
	12.2	24	15	22	22	20.4
	9	15	8.3	16	22.9	25.6
	8.5	24	14	18	25	32
	8.9	22.3	14	15	11	14
	11	28.7	12.5	21	13	18
	11.2	23.5	16.5	15	12.6	21.5
	9.7	12	11.9	18	18.5	26
	8.3	14	10.9	15	22	20
	12.4	15	13.5	19	21	29.4
	9.6	13	6	16.8	17	19
	8.7	17	4.8	15	14.8	21
	6.4	13	8.4	17	15.9	22
	6	14	10.5	20.7	16	17
	13.8	15	10.9	26.7	8	23
	11.5	15	13	33	15.6	30
	12	17	9.6	26.3	14.4	19
	4	23	10.5	26.8	15.8	21
	5	13	11.3	37.5	15.6	18
	3	15	12.3	28.5	20	19.2
	11	14	10.5	33.8	16	19.5
	10.5	16	15	25	13.8	23
	10	15.7	8.6	21	10	30.7
	6	14	12	18.7	13.3	23.5
	8	14.5	10	22.6	13	35.6
	18	19.5	12.6	25	13.5	23.2
	14	15	12	20	12.7	19.8
	15	20.7	10	22.7	8	20.5
	10.5	14	15	27.5	17.8	21
	9	14	9.4	28.4	18	18
	11.6	14.9	8.5	20.4	17.5	23
	8.8	24	12	29	19.5	19.5
	8.8	14	10.5	25	14	25
	7	15	13	20.4	16	20
	8	14.9	12	32	11	19
	9	17.9	9	22	15	28
	8.5	17	12	31	18	26.7
	11.5	12.3	10	14.6	12.4	12.8
	9.3	12.2	10.6	12.9	11.5	14
	7.9	12	9.9	11.2	10.7	15.3
	8.4	11.9	5.1	11	8.8	19.7
	9.4	15.1	10.7	12	8	12.8
	9.8	18.6	8.1	14.3	10.9	12.3
	10.6	13.6	8.3	13	11.4	13.5
	11.4	12.1	6.2	13.6	10.6	10.9
	10.1	10.9	7	13	10	15.8
	10.5	14.5	9.9	13.2	7.8	21
	11.3	20.8	13.1	18.7	8	16
	8.4	13.4	9.7	16.6	9.5	21
	8.4	16.2	9.7	15.4	8.1	14
	9.5	17.8	7.4	13.5	7	19
	8.2	17.2	7.8	15	5.2	11
	7.6	11.2	8.8	12.5	6.4	14
	6.1	10	7.7	10	6.3	16.1
	10.8	13	7.3	12.4	9.3	12
	9.8	12.6	9.5	9.8	8.4	16.8
	8.8	14	7.6	12.7	7.5	14
	9	10.6	6.4	15	7	11
	7.5	11.3	6.2	12	6.2	21.6
	8.3	10.3	9.6	14.8	6.8	20
	7.4	11.4	10.3	14.3	11	11.6
	11.3	9.4	8.4	13.3	11.6	16.5
	11	11.5	10	10	10.8	14.5
	11.2	14.9	9.5	9.5	10.6	9
	9.7	8.5	9.3	12.2	9.8	7
	9.3	11.2	13.1	17.4	8.8	14
	8.4	9.1	12.5	15.2	8.8	8
	9	10.3	11.6	18.8	7.3	14
	9.4	9	10.8	16.7	9.2	25.7
	10.9	8.7	9.5	17.3	8.8	18.4
	13.2	9.2	10	15.1	7.9	19.8
	12.2	11.2	10.2	12.4	7.6	13
	9.2	10.6	9.8	13.3	7	19.6
	10.8	9.7	8.9	12.1	8.2	17.1
	9.3	20.8	8.5	12	7.9	27
	9.2	17.8	7.8	11.3	9.5	20
	9.2	12	10.8	11.6	10.1	17
	8.6	18.6	9	14.2	9	19.6
	8.7	14.6	9.3	18	8	17.7
	7	10.8	8.5	12	8.3	20.7
	7.8	10.5	8	15.4	7.6	18.5
	6.9	10.9	9.7	13.5	6.8	16.4
	9.2	12.8	9.3	14.3	8.9	19
	8.1	10.2	14	16.8	8	19
	7.6	10	11.3	15.7	8.6	15
	6.8	12	10.3	19.4	10.3	20.8
	6.5	13.4	8.7	17.2	12.6	14.6
	9	13.6	11.4	13.8	16.3	14
	9	13.3	10.2	17	12.2	17.7
	9.2	13.3	9.4	23	10.5	17.6
	8.2	11.6	9.8	14	8.2	19.4
	7	10	9.9	16	12.3	21
	6.4	14.6	7.9	9.8	10.9	11
	6.5	13.1	8.8	14	9.5	14
	11.6	11.4	10.7	17.5	9.3	33
	11	10.3	8.8	18	12.1	18.7
	9.5	11.3	9.3	16.9	10.5	13
	10.7	13.6	13.9	11.3	12	23
	9.6	11.7	9.9	15.5	9.6	31
	9	15	10.4	14	13.5	24
	11.4	10	10	21	10.1	37.7
	12	12.4	13.8	12.9	7.8	31
	11.6	13.4	9.4	13.8	11.4	10
	11	16.4	7.5	17.4	11.6	23
	10.9	14.3	7.9	15	9.4	24
	9.8	12.2	9.5	16	10.4	23
	14	11.7	8	19	11.2	16
	13.4	12.3	8	10	14	25
	13.6	11.2	6.7	27.9	13.4	21
	12.2	13.5	9.8	31	14.4	21
	12.7	12.3	9.2	27	10.9	25
	11.5	11.5	9.6	18	11.6	12
	11.2	11	11.1	10	13.2	12
	10.7	10	10.3	18	11.8	21
	8.5	10.9	12	16.5	10.9	33
	8.3	11	8.5	11.6	9.6	17.5
	9.7	10	9.3	31	11.3	14
	8.5	10	6.7	12	11.6	14.6
	8.9	12.4	7.9	14	8.9	30
	11.7	15.3	7.4	22	7.6	9
	10	12.3	8.7	11	7	20
	10.1	12.2	11	18	9.8	22.6
	9.5	10	10.2	15	8.4	13.5
	10.9	10	10.3	18.9	10	17.8
	10.8	14.9	11	16.5	7.3	18.2
	9.9	12.2	9.8	20	7	15
	12.6	17.8	7.2	18.3	5.5	16.2

## Sheet: Figure 9-S1N-Day 5 intensity
Mean intensity of NMY-2 at Day 5
WT	cup-5	eat-2	eat-2;cup-5	isp-1	cup-5;isp-1
14.9	19	17	28.5	21	17
14.2	19	21	26.3	18	18
14	21	14.5	29.7	15	23
17	17	14.8	19.9	19	19
17	15	13	25.8	17	23.4
10.6	33	9	26.8	19	25
20.5	24.6	13.8	21	9.8	23	The numerical data are analyzed by GraphPad Prism 6 and represented as a bar graph in Figure 9-figure supplement 1N.
16.7	25.9	16.4	20	11.2	27
17.8	26	13.6	18	11	27
11	28.5	16.4	33	11.7	14
14	17.5	14.5	20.6	16.3	13
14.8	22	20	15	18	16
18	17	21	17.77	19	20
16	25.6	21	12	14	18
16.5	32	12.5	20	9.4	24
16	30	12.5	17	9.7	22.5
15.7	16	17.5	14	13	23.8
20	19	12.8	19.5	11.6	25
15.8	25	15	13	7.5	16.7
17.5	17	17.5	18	9	13.5
15.8	20	6.8	24	7.5	20.9
15.3	19	9	24.3	12	17.5
17	25	12	21	12	14
14	32	17.8	26	13.6	16
15	23	19	16	15	18
12	24	19.7	27.7	15.8	16
15	22	14	21.9	10.7	17.7
11.5	28	8	25	13	26
15	21	7.4	22.9	15	23.6
13	18	8.6	28.7	9.4	24.7
16.7	23	10	26	11.2	10.9
10.5	18	10	19.9	10.8	11.8
12.2	15	9.5	21	8.6	15.3
10.6	18	13.7	18.4	10.7	20.4
14.7	15	11.8	18.1	7.3	20.8
10.8	20	16	16.5	7.8	23
20.6	24	11	22.9	8	18
17.4	26	14.8	20.5	12	17
20.6	16.3	15.8	16	10.7	12.5
15	26	15.5	26	13	19.3
14.5	25	16.6	20	13	18.6
13.9	18	12.6	20	16	18.9
14.3	22.7	17	39	16	18.2
19	25.9	14	30	13	14.8
16	29.2	10	35	11	13
20	18.6	16	30	7	19.8
19.7	16	20	40	14	21.3
18.8	20	18	25	13.8	17.4
15	20.4	14.5	39	16.8	14.2
14.5	27.4	17.8	40	15	21
16.3	31	10.5	24	12	30
13.3	22.6	10	20.5	12.7	38
19.5	26.4	10	26	12.2	29.4
22	27.8	15	22.6	10	25
16	22.5	12	33.5	9.7	23
16	20.4	14	27	11.3	27
16	23.3	11.6	29	9.6	35
19	27.8	16	31	12	27
15	16.3	13	27.3	12.5	33
10	20	17	33	8.5	38
7.2	19	15.4	23	9.6	20.5
8.7	17.8	25.5	32	13	25.7
10.5	12.6	18.6	27	15	30
11.2	17.3	18	36.8	9.4	28.8
9.6	14.4	17	38	11.1	26.3
11.3	18.8	17.8	56	12.3	25.5
8	14	22	38.9	16.5	28.5
12.8	16.5	21.3	52.7	19.3	21
11.7	18	20.5	39.8	15.7	19
11.3	6.9	13	34	13.8	18
22	13.3	13.5	36.8	14	22
23.7	13.5	17.8	42	13.9	29.3
18.8	13.3	14	54	12.6	27.4
14.6	16.7	15	51.8	15.8	20.8
15	16	18	55.8	14.8	30.1
15	10.4	15	35.6	16.6	29.5
17.2	7.2	20	25.7	16.5	28.2
16.2	9	15.6	47.5	18.7	25.3
16	13.9	19.5	38.7	10.8	28.5
16.5	13	29	47.5	12.8	18.6
17.5	18	32.8	50.7	13.9	23.5
23.7	9.6	16	23.2	12.2	20
17.4	13.6	21.3	28.9	10.6	20
13.7	7.7	18.4	45.7	12.5	19.5
17.9	8.8	18	29	12.6	19.9
8.8	13.7	19.8	47.6	17.9	21
13.5	9.9	20.8	50	12.2	19.5
12.4	11.2	22.2	39.3	14.2	23
12.8	10	18.9	47.6	15.4	25
13	11.7	23.5	53	18.6	24.3
12.4	7	13.3	33	12.4	32
10.1	9.7	13.6	45	14.4	29
10.5	7.5	18.8	45.6	15.1	26.8
13.6	11.4	15	41	19.3	33
26.8	10.8	14.4	44.7	20	27
22.3	13.1	17.4	54.7	17.3	25.5
16.9	9.6	16.8	23.5	8.6	29.9
14	8.5	17.4	23	11.1	28.4
15.3	10	21.6	32	10.3	26.9
20.4	4.9	29.1	25	5.8	20
11.7	10	33.3	32	5.6	21
13.7	7	29.2	35	10.4	24
16.2	10.6	16.8	26	11.3	19
13.5	13.8	21.8	35.5	12.3	17
10	14.7	27.6	41.8	12.6	21
12.4	8.6	19.3	31	10	27.7
19.7	9	17.2	33	14.3	25
20.8	11	15.9	52.4	11.8	23.6
20.6	10.9	16	28.3	13.5	16.2
15	10.7	16.7	23.1	11.4	15
19.5	9.1	15.8	33	13.8	24
17.8	10.6	18	34.4	13.1	14
15.5	8.5	18.9	36.9	12.4	13
16.2	9.2	21.8	38.9	14	23
16	12.3	29.2	24	8.1	25
17.2	16.6	25.3	26	8.7	20.8
17	17	33.5	33	7	14.6
18.3	13.1	18	30	11.4	14
11.7	14.1	16	32.8	14	17.7
15.1	14.7	16	47.3	15.5	17.6
17.3	11.8	19	45.5	21	19.4
13	9.8	25	57	20	21
14.9	14	22	50	19	11
11.7	9.2	15.4	34.9	9.9	13
12.2	12.7	17.3	27	11.6	12.7
18.3	10.6	15	38	11.4	15.2
13.8	13.9	21.3	41	10.2	16
15	14	29.4	30	9.8	16
15.8	16.8	25	47.5	11	18
11.7	9.8	25.5	51.8	7.8	17.8
8	11.8	17	40.3	7.8	18.3
10	13.8	24	43.5	7.8	14.3
9	25	22.3	38.2	7	22
16.7	29	23.7	33.3	10.2	28
19.2	24	25.2	41.3	11	30
17.8	10.9	19.9	32.6	12.4	26.8
16.3	10.9	19.3	32.9	16.3	25.3
15.8	14	20.2	35.9	17	19.9
14.1	10.8	25.1	49.5	18.8	23
11.1	8.7	23.7	50	18	26
14.2	12	20.8	31.3	21	25.8
13.3	15.6	28.6	50.6	13.7	30
7.6	11.5	30.5	35	14.7	30
8.6	16.9	25.8	34	19	27.6
9.2	12.7	20.6	39.3	10	19
12.6	12	24.5	45	11	17
8.9	12.9	23.8	48	13	27
12	13	26.2	49	9.8	21
10	11	22.3	50.3	8	18.9
8	12	25.6	45.2	10	18.9

## Sheet: Figure 9-S1O-percentage
NMY-2 puncta at Day 5
	0 puncta(%)	less than 10 puncta(%)	between 10 and 30 puncta(%)	over 30 puncta(%)
WT	12	24	38	26
cup-5(bp510)	16	30	30	24
eat-2(ad1116)	80	18	0	2
eat-2;cup-5	30	46	16	8
isp-1(qm150)	78	22	0	0
isp-1;cup-5	44	22	24	10
The numerical data are analyzed by GraphPad Prism 6 and represented as a bar graph in Figure 9-figure supplement 1O.

## Sheet: Figure 9-S1X-LSG-LTR
		The numerical data are analyzed by GraphPad Prism 6 and represented as a bar graph in Figure 9- figure supplement 1X.
		Relative intensity of LSG/LTR in the intestine
		WT Day 1	cup-5 Day 1	WT Day 3	cup-5 Day 3	WT Day 5	cup-5 Day 5	WT Day 9	cup-5 Day 9
		1.31896	0.169218	0.715101	1	0.279158	0.164417	0.113869	1.1711
		1.56215	0.365237	0.696877	0.692913	0.260852	0.214305	0.101725	0.296943
		2.2385	0.208635	0.500303	0.61809	0.23186	0.139246	0.114487	0.434093
		1.31752	0.213493	0.722021	0.929412	0.168595	0.230974	0.121558	0.505694
		2.957	0.294856	0.336486	0.631373	0.207508	0.180501	0.143702	0.454748
		1.6678	0.202393	0.616027	0.981455	0.248062	0.216762	0.160275	0.581933
		1.57841	0.254392	0.62333	1.39283	0.244112	0.229606	0.160405	0.583698
		1.89769	0.300798	0.471612	1.40832	0.230881	0.221947	0.306809	0.543739
		1.2327	0.243086	0.617887	1.15555	0.280703	0.365122	0.182978	0.498203
		1.14494	0.233029	0.420857	1.32667	0.266476	0.373291	0.266775	0.479523
		1.12962	0.20119	0.88759	1.25826	0.332072	0.49271	0.199022	0.501518
		1.41468	0.221364	0.749399	1.25637	0.293337	0.332673	0.263255	0.549578
		0.904698	0.201801	0.778838	1.21464	0.244618	0.395129	0.231852	0.426994
		1.08496	0.209081	0.614775	1.49147	0.29048	0.532314	0.320817	0.476697
		0.747604	0.266689	1.00716	1.4653	0.33231	0.406327	0.217927	0.46359
		1.65488	0.243246	0.45377	0.993867	0.258239	0.443452	0.230907	0.498477
		0.816678	0.347805	0.523135	1.30947	0.257429	0.222772	0.396748	0.530418
		1.37386	0.28171	0.385362	1.28056	0.209181	0.501219	0.326325	0.552106
		1.1058	0.37758	0.806176	1.40559	0.261421	0.549692	0.235517	0.444693
		1.42513	0.306198	0.584813	1.93743	0.268781	0.343846	0.249217	0.586614
		1.06506	0.49335	0.679727	1.45812	0.263989	0.552167	0.174089	0.558158
		2.2493	0.340826	0.106461	1.26504	0.249691	0.31292	0.414185	0.604401
		1.0534	0.428514	0.626339	1.02151	0.360248	0.503842	0.325028	0.376573
		0.884615	0.23083	0.385823	1.56697	0.243604	0.35903	0.366482	0.558898
		1.47418	0.208589	0.821297	1.20156	0.27411	0.386496	0.287628	0.504071
		0.824931	0.351351	0.691901	1.39374	0.278884	0.489707	0.252695	0.557923
		2.02865	0.38493	0.824561	1.1434	0.258803	0.464969	0.204882	0.511973
		1.33977	0.312735	0.725289	1.16924	0.266959	0.484767	0.223874	0.557013
		1.27149	0.278852	0.77175	1.21068	0.262744	0.513648	0.359663	0.296866
		1.76409	0.315794	0.616702	1.27248	0.281539	0.348717	0.373514	0.514893
		1.2445	0.335037	0.687425	1.39381	0.271373	0.558014	0.243846	0.368353
		1.00217	0.277213	0.479384	1.52373	0.32901	0.511236	0.333635	0.572449
		1.39139	0.364052	0.512821	0.867161	0.286394	0.416696	0.347614	0.597122
		0.883068	0.237362	0.428136	1.28669	0.231489	0.629579	0.150851	0.494251
		0.754098	0.394694	0.625984	1.48437	0.279635	0.455442	0.260915	0.479824
		1.07964	0.217775	0.570142	1.26127	0.229776	0.371665	0.310467	0.469251
		0.988562	0.282001	0.490758	1.52591	0.273818	0.381979	0.308672	0.405798
		1.05228	0.310397	0.988166	1.21773	0.289845	0.445035	0.178431	0.434899
		1.85813	0.335703	0.950673	1.56648	0.291965	0.260601	0.214521	0.50405
		0.72335	0.219331	0.924901	1.20229	0.323116	0.355087	0.227864	0.556617
		0.935884	0.237902	0.996078	1.21813	0.305194	0.515464	0.211404	0.568593
		1.18716	0.246006	1.29461	1.40316	0.197256	0.469651	0.196023	0.408923
		0.810208	0.226921	1.29998	1.32258	0.163735	0.437916	0.361948	0.370319
		0.743529	0.18748	1.17889	1.47347	0.256308	0.510263	0.186728	0.606754
		0.743529	0.356264	1.23526	1.45165	0.248284	0.494354	0.310734	0.424258
		2.1545	0.314511	1.34628	1.25908	0.209804	0.490126	0.232853	0.435377
		1.75412	0.231825	0.632915	1.23206	0.211003	0.390541	0.31869	0.478846
		1.67161	0.216585	0.78499	0.794918	0.676809	0.431045	0.377813	0.367791
		1.64678	0.200601	0.610616	0.876505	0.697732	0.429927	0.247103	0.536577
		1.8501	0.355253	0.976218	1.07661	0.989303	0.181597	0.202715	0.613851
		2.64444	0.341921	0.825052	1.16143	1.01954	0.592844	0.254436	0.490683
		2.40016	0.296296	1.09913	0.823489	0.838562	0.426187	0.241525	0.650384
		2.05419	0.307075	1.03894	1.02323	1.04966	0.537818	0.278424	0.551721
		2.33764	0.218494	1.00571	0.981173	1.12149	0.471306	0.379641	0.596404
		3.00254	0.248807	1.03707	1.5662	1.04376	0.49918	0.287197	0.472323
		2.21921	0.281831	1.22089	1.53549	0.997875	0.535451	0.357015	0.395405
		2.26942	0.341008	0.713306	1.23669	0.977931	0.475664	0.412013	0.503662
		2.75373	0.185099	0.971809	1.37985	0.993596	0.504766	0.228658	0.63252
		2.16337	0.351205	1.33182	1.36159	1.0639	0.432648	0.234815	0.472182
		1.92677	0.215149	1.11794	1.32613	1.28499	0.593388	0.219101	0.467299
		1.69433	0.333839	1.3669	1.02812	1.44992	0.560518	0.344752	0.587302
		1.98581	0.321814	0.705153	1.47479	1.18989	0.576878	0.483336	0.541436
		2.32978	0.183253	0.632683	1.11134	0.789914	0.521884	0.225378	0.565058
		2.52944	0.326255	0.718855	1.27689	0.915951	0.570815	0.256836	0.556569
		2.03331	0.281929	0.651331	1.28734	1.23728	0.381045	0.365719	0.458157
		1.76798	0.244728	1.20075	1.27065	1.0433	0.446683	0.380478	0.555307
		1.92795	0.289237	1.14834	1.24828	1.18028	0.529029	0.311628	0.514363
		2.24075	0.207356	0.904274	1.13155	1.27037	0.385334	0.387976	0.410661
		2.23276	0.203783	0.94269	1.38902	1.35144	0.405564	0.281508	0.469351
		2.09654	0.26915	0.938691	0.970205	1.19363	0.56213	0.324476	0.491977
		1.77638	0.25909	0.879675	0.891459	1.10586	0.24512	0.182983	0.469242
		2.17382	0.255799	0.890158	1.24715	1.09818	0.444378	0.37602	0.565311
		2.67721	0.200079	0.637112	1.52787	0.761329	0.437008	0.316473	0.547018
		1.77202	0.1334	0.62586	1.10914	0.482383	0.715826	0.297326	0.504608
		2.69287	1.70131	0.85604	1.49433	0.466504	0.532581	0.227777	0.530556
		2.31771	1.60263	0.885478	1.08408	0.526449	0.557724	0.321231	0.531783
		1.90219	2.08361	0.874793	0.97171	1.16915	0.48658	0.388474	0.402973
		2.43895	2.17469	0.785984	1.37345	1.06544	0.480781	0.25951	0.466413
		1.81053	2.34857	0.558686	0.734623	1.16102	0.254946	0.3874	0.542824
		1.82331	2.26336	0.412074	1.06595	1.08039	0.30126	0.440789	0.51736
		2.15643	2.39841	0.474754	1.35206	1.18159	0.633807	0.288165	0.504527
		1.71804	1.98279	0.486057	0.98481	1.16979	0.351873	0.334771	0.503947
		1.9752	2.23272	0.467197	1.25654	1.1732	0.507184	0.401679	0.315234
		2.14868	2.58007	0.433985	0.848663	1.22705	0.48619	0.546483	0.462248
		1.98725	2.74871	0.477845	0.977445	1.24073	0.483119	0.490657	0.36876
		1.67415	2.44284	0.43805	0.664313	1.17936	0.482885	0.760316	0.438225
		1.84275	2.26933	0.454319	0.813433	1.30695	0.911002	0.649017	0.520395
		1.47235	2.08101	0.442173	1.20376	1.35143	1.03469	0.432222	0.361629
		1.50923	2.24848	0.552974	1.00954	1.17614	0.92219	0.535736	0.452036
		1.70424	3.23809	0.572285	1.29331	1.02072	0.945004	0.614747	0.428794
		1.56425	2.25502	0.479342	1.12448	1.31806	0.944187	0.512929	0.483049
		2.02714	2.28729	0.513233	1.28775	1.31701	1.04718	0.578045	0.459852
		1.35888	2.31416	0.543439	1.62229	1.12304	1.0998	0.473287	0.408189
		1.63473	2.08476	0.520895	1.40845	1.05393	1.09603	0.637045	0.495872
		2.02394	2.32329	0.550878	1.17363	1.39972	0.947299	0.564115	0.436431
		1.65954	2.18917	0.497565	1.15652	1.0772	1.18779	0.521724	0.470165
		1.77669	2.40386	0.517621	1.0795	1.23178	1.09329	0.61593	0.449658
		1.88372	2.08237	0.470904	1.6083	1.24948	0.820493	0.426135	0.444286
		1.61147	1.75061	0.504677	1.69045	1.04902	1.02451	0.512339	0.474732
		1.7627	2.67312	0.614334	1.14769	1.44733	1.10566	0.459148	0.337637
		1.79268	2.24826	0.514905	1.30477	1.28193	0.963525	0.544773	0.432921
		2.37415	2.14963	0.492453	1.63134	1.13493	0.982649	0.460458	0.516761
		1.61565	2.1656	0.615886	1.70418	1.05724	0.945927	0.469057	0.486693
		1.90274	1.93621	0.598596	1.02334	1.23558	1.1431	0.468827	0.288623
		2.55133	1.86335	0.596918	1.58173	1.20143	1.0924	0.52006	0.358573
		1.87871	2.51484	0.237618	1.01723	1.39457	0.998398	0.470708	0.480099
		2.07561	2.10639	0.600984	1.18226	1.25561	0.911243	0.466767	0.534207
		1.41908	2.14595	0.629083	1.27744	1.16144	1.16432	0.529025	0.523223
		1.53158	2.20421	0.652319	0.988218	1.2072	1.11069	0.481113	0.684385
		1.48936	2.17024	0.61115	1.51039	1.1077	0.911336	0.485544	0.613561
		1.69463	2.09913	0.700367	1.4099	1.07345	0.849562	0.488974	0.711641
		2.20822	2.15611	0.62609	1.46997	1.13011	1.00669	0.464431	0.655216
		3.0089	2.15655	0.534691	1.01275	1.12129	1.28301	0.459785	0.752873
		1.40291	2.07655	0.612122	1.65335	1.14369	1.10847	0.43349	0.548905
		1.79786	2.3301	0.682878	1.33685	1.43182	1.07599	0.492893	0.641207
		1.67388	2.1277	0.242468	0.973338	1.11302	1.02664	0.388047	0.609987
		1.53808	2.2858	0.619392	1.81655	1.06029	1.22863	0.36234	0.700886
		2.03998	1.50215	0.640033	2.00211	1.33619	1.22104	0.478345	0.714193
		1.52892	0.703851	0.807148	1.02547	1.12499	0.999459	0.457742	0.788329
		2.09995	1.11606	0.611994	0.952776	1.12499	1.09592	0.430918	0.681209
		2.11094	1.29172	0.652677	1.05601	1.2948	1.09053	0.44184	0.871522
		1.7628	1.26855	0.648977	1.50075	1.42243	1.0795	0.400216	0.658629
		1.88807	1.5155	0.573568	1.05541	1.51505	0.942144	0.614244	0.649473
		1.16536	1.26994	0.585824	0.973811	1.04379	0.898199	0.436863	0.67082
		1.55698	1.42115	0.768126	1.61287	1.22644	1.0893	0.542603	0.654009
		1.41856	1.23674	0.717425	1.18357	1.16462	1.06053	0.581721	0.631783
		1.76471	1.1606	0.672874	1.1911	1.15932	1.00364	0.507531	0.609576
		1.70267	1.23259	0.636259	1.80335	2.00875	1.14727	0.390724	0.682578
		1.92077	1.28325	0.61228	1.35713	1.26844	1.12823	0.504866	0.678869
		1.57512	1.31605	0.731308	1.41041	1.76031	1.00848	0.433122	0.56591
		1.55044	1.49178	0.698543	1.14098	1.66333	1.22433	0.54842	0.595221
		2.02469	1.2316	0.668113	1.09776	1.73332	1.04383	0.533489	0.727573
		1.99954	1.23794	0.708465	1.3378	1.45418	1.00363	0.506564	0.728458
		1.46024	1.3863	0.647091	1.13255	1.69431	1.18725	0.635979	0.728064
		1.62064	1.22394	0.601795	1.5242	1.37457	1.10048	0.457631	0.677484
		1.69714	1.32566	0.702497	1.50639	1.06103	1.3064	0.532915	0.665691
		1.23429	1.3558	0.705102	1.15383	2.01542	0.999659	0.471128	0.650485
		1.56708	1.54755	0.705165	1.30312	1.03846	0.911259	0.447538	0.682607
		1.76276	1.48799	0.769559	1.26293	1.76394	0.911259	0.446459	0.638376
		1.32658	1.25	0.711404	1.07258	1.39655	0.274154	0.613551	0.750642
		1.63348	1.58695	0.68881	1.04798	1.50279	0.298035	0.640833	0.667519
		1.55253	1.26506	0.750981	1.07477	1.24286	0.286252	0.402158	0.752732
		1.85098	1.31652	0.888213	1.44176	1.70621	0.287083	0.487265	0.582388
		1.95436	1.30887	0.70857	1.084	1.57765	0.286975	0.443287	0.602986
		1.2366	1.26086	0.793698	1.24235	1.55	0.268293	0.456318	0.653996
		1.7133	1.41143	0.944262	1.12694	1.58607	0.422207	0.870462	0.700172
		1.54531	1.26095	0.697068	1.46352	1.29271	0.477267	0.791604	0.644443
		1.46643	1.31088	0.911531	1.11555	1.85788	0.230873	0.875201	0.638765
		1.49853	1.47034	0.872543	1.2151	1.32769	0.567505	0.771192	0.699279
		1.62843	1.48607	0.669274	1.14543	1.45522	0.491189	0.756264	0.672678
		1.23712	1.67053	0.632245	1.13851	1.30293	0.528232	0.47307	0.741755
		4.84931	1.34475	0.633247	1.09338	1.59637	0.463928	0.649121	0.625618
		1.58503	1.16105	0.90209	1.251	1.3966	0.568165	0.643408	0.675431
		3.61845	1.15058	0.909206	1.62691	0.765385	0.446405	0.664962	0.601347
		1.48856	1.57047	0.665043	1.62024	0.910853	0.518993	0.278143	0.655324
		2.33323	1.75781	0.624882	1.25981	1.03228	0.540846	0.266521	0.632582
		2.77858	1.40731	0.676589	1.54467	0.981286	0.544107	0.19387	0.625396
		1.78138	1.30574	0.604421	1.29851	1.83215	0.581114	0.277014	0.681436
		2.17381	1.2943	0.583972	1.16468	1.61555	0.493453	0.389947	0.620686
		3.1296	0.910163	0.683487	1.15643	1.49399	0.506368	0.260182	0.699065
		2.55617	1.07187	0.924074	1.34248	2.00628	0.547812	0.191988	0.660938
		2.38562	1.25473	0.675384	1.15513	0.973436	0.616022	0.419411	0.62511
		1.85694	1.51219	0.730213	1.62213	1.76053	0.515022	0.365886	0.614855
		1.79802	1.30289	0.724092	1.11585	1.6439	0.530215	0.503198	0.707761
		1.90347	1.28111	0.783748	1.20964	1.67151	0.620205	0.454269	0.63623
		3.28729	1.23074	0.951965	1.26394	1.13767	0.604975	0.456248	0.646138
		3.58578	1.39522	0.74345	1.07624	1.4354	0.630757	0.346364	0.698372
		3.18098	1.29706	0.703061	1.2822	1.53038	0.530973	0.380468	0.674959
		2.89428	0.799437	1.03662	1.4321	1.55952	0.459133	0.648374	0.60634
		2.276	1.36537	0.565111	1.09678	1.20673	0.482658	0.680099	0.634177
		1.60693	1.29481	0.672259	1.1981	0.967337	0.589634	0.828589	0.72073
		2.99974	1.09465	0.664693	1.22272	0.905855	0.605826	0.812799	0.701091
		2.12157	1.18391	0.801698	1.26815	1.16805	0.554921	0.435731	0.617067
		4.97117	1.45445	0.6938	1.08251	1.36105	0.554106	0.662351	0.71698
		2.99302	1.16959	0.810081	1.24019	1.51775	0.602945	0.758889	0.709774
		1.59137	1.14071	0.746755	1.51129	1.09864	0.569016	0.348941	0.641574
		1.65773	0.980194	0.611317	1.13683	1.41295	0.578448	0.424557	0.649632
		1.38496	1.0725	0.601746	1.10702	1.07227	0.470255	0.377366	0.765464
		1.5844	1.26336	0.736104	1.19548	1.09035	0.565573	0.523733	0.775004
		3.26316	1.19716	0.697079	1.05391	0.558626	0.545485	0.369037	0.602557
		2.24003	0.985727	0.416974	1.29082	0.586791	0.479424	0.295801	0.73996
		2.24991	0.98894	0.352113	1.08804	1.27632	0.634815	0.229542	0.537667
		2.45252	1.04699	1.04023	1.23253	1.18776	0.545886	0.570831	0.688905
		1.34189	0.658145	1.17826	1.05464	1.32949	0.522115	0.454604	0.724417
		1.65579	2.64158	0.758422	1.59652	1.37916	0.496223	0.479384	0.665402
		1.65847	1.1143	0.9409	1.57517	1.14563	0.485383	0.512821	0.707881
		2.88795	1.48456	0.906333	1.61816	1.20563	0.49729	0.428136	0.589666
		1.44262	1.05855	0.359239	1.09482	1.50755	0.529696	0.625984	0.699098
		1.45359	0.913283	0.344884	1.96193	1.15984	0.490788	0.570142	0.644241
		2.30073	0.560166	1.30884	1.1342	1.25868	0.598073	0.490758	0.64361
		3.48571	0.659335	0.94614	1.63245	1.33004	0.463004	1.16283	0.56068
		2.05872	0.879195	1.46507	1.21365	1.27858	0.461377	1.09434	0.709129
		1.90909	0.740302	1.19403	1.71577	1.55169	0.387453	0.762501	0.6171
		1.77125	0.614961	0.995115	1.07516	1.42665	0.39627	1.18996	0.680527
		2.11218	0.671892	1.09506	1.5128	1.3357	0.407015	0.957986	0.595761
		1.46435	0.428571	0.966416	1.75353	1.85601	0.437458	1.39087	0.583465
		1.50697	0.659453	0.945709	1.49327	1.6912	0.387593	0.937686	0.715442
		1.20838	0.678251	0.794441	1.71811	1.5857	0.36602	0.913859	0.700653
		2.416	0.489531	0.994988	1.3466	1.36867	0.477448	0.646551	0.767182
		1.95436	0.795606	0.853815	1.25532	1.29551	0.370445	0.768495	0.660401
		0.640279	0.795606	0.92074	1.13492	1.31186	0.405566	0.933555	0.749668
		0.508388	1.0566	1.08199	1.47864	1.32507	0.40175	0.940506	0.715776
		0.66809	1.25414	0.971799	1.74761	1.54656	0.371297	0.6888	0.561816
		0.717179	0.982591	1.21494	1.12138	1.23731	0.458373	0.858883	0.729299
		0.516632	1.20478	1.03032	1.6428	1.14411	0.451925	0.981973	0.637942
		0.873491	0.682891	0.995161	1.1541	1.16594	0.389031	1.01036	0.570377
		0.297279	1.01272	0.893408	1.36379	1.28642	0.436596	0.818133	0.599696
		0.516665	1.42644	1.16368	1.24677	1.4435	0.430683	1.15405	0.744066
		0.373786	1.22188	1.13762	1.36481	1.28932	0.442939	0.437677	0.629136
		0.651021	0.916189	1.05553	1.35477	1.56797	0.464594	0.596708	0.659355
		0.506134	1.03584	0.757545	1.13269	1.59873	0.467929	0.447877	0.678029
		0.404115	1.04441	0.995369	1.44329	1.48748	0.447697	0.500634	0.638238
		0.423529	1.34338	1.04581	1.21924	1.76296	0.475203	0.657378	0.564529
		0.442337	0.800899	1.06319	1.29711	1.41559	0.468735	0.639918	0.697372
		0.453383	1.00557	0.936591	1.26965	1.26888	0.40681	0.768987	0.701957
		0.549611	0.935137	0.941782	1.26775	1.35215	0.45538	0.698645	0.602923
		0.341804	0.912403	0.856273	1.99491	1.46033	0.389037	0.561697	0.628307
		0.666813	0.717335	1.07992	2.01818	1.30965	0.549656	0.688385	0.680383
		0.42591	0.884629	0.70963	1.10152	1.36198	0.462966	0.70275	0.662943
		0.372386	0.789421	1.93402	1.42639	1.31349	0.454974	0.471181	0.718252
		0.596508	0.9192	2.06857	1.17941	1.30015	0.583583	0.458346	0.633164
		0.403332	1.17293	1.76151	1.60651	1.82528	0.724693	0.578652	0.713381
		0.419491	1.30116	1.89799	1.26192	1.78493	0.449998	0.660421	0.555148
		0.462614	1.18581	1.90167	1.12678	1.49162	0.582108	0.521796	0.563402
		0.739118	0.857207	2.1877	1.6801	1.56758	0.475722	0.495412	0.560949
		0.358308	1.0298	1.75649	1.43014	2.18562	0.510413	0.615962	0.691057
		0.360474	0.780869	1.48138	1.21773	1.61555	0.495133	0.523321	0.628606
		0.303457	1.18639	1.77335	1.53068	1.77993	0.469707	0.531838	0.564032
		0.283462	0.765825	2.57926	2.02768	1.8513	0.524089	0.661111	0.606585
		0.399882	1.26835	1.47044	1.28762	1.61579	0.467433	1.25358	0.528198
		0.348862	0.995369	2.10746	1.56324	1.55324	0.545794	0.880673	0.635302
		0.838994	1.11368	2.85806	1.872	1.58543	0.428792	0.776273	0.643192
		0.589066	1.40875	1.75328	1.53143	1.87906	0.468057	0.936694	0.56
		0.310398	1.07561	1.05969	1.63332	1.3173	0.514603	0.694532	0.562316
		0.404208	1.21695	2.00392	2.08168	1.68869	0.518845	0.665009	0.67451
		0.505634	1.34412	2.17809	1.78886	1.51954	0.472058	0.97997	0.559032
		0.360459	2.07472	2.09913	1.80906	1.35865	0.367819	0.779647	0.58798
		0.424642	1.85017	2.13611	1.38014	1.23113	0.41608	1.15571	0.618345
		0.344273	1.70003	2.13704	1.27073	1.47368	0.577614	0.841354	0.672199
		0.26971	1.76039	2.14361	1.15553	1.16475	0.356583	0.929131	1.20415
		0.513132	1.67233	2.23393	1.47471	1.18899	0.445253	1.41159	1.24052
		0.331076	2.12741	2.99436	1.96315	1.32447	0.503285	1.18374	1.42667
		0.377036	1.68405	1.80777	1.37089	1.06026	0.493261	0.890809	1.44995
		1.56671	1.65356	2.04244	1.70809	1.51116	0.576383	1.10801	1.16988
		1.94887	2.3125	1.46751	1.17826	1.40452	0.524844	1.00152	1.3331
		2.6993	1.84887	2.56196	1.1589	1.17436	0.607492	1.38461	1.38891
		1.7746	1.98288	2.40125	1.99184	1.45182	0.431393	1.18384	1.37407
		1.98246	1.83912	2.01275	1.20794	1.19352	0.406383	1.02299	1.36007
		2.36971	1.72246	1.78808	1.42198	1.05196	0.471517	1.58807	1.19271
		2.0474	2.24733	2.01	1.28202	1.47268	0.496443	1.41961	1.41873
		2.20626	1.8109	2.16354	1.37865	1.69631	0.439457	0.843965	1.36534
		2.02196	1.76476	1.70319	1.21443	1.34374	0.422691	0.456318	1.30522
		2.04551	1.56296	2.20318	1.12011	1.35313	0.588198	0.320384	1.44605
		2.0883	1.53486	2.1127	1.85073	1.36045	0.520608	0.408871	1.43662
		1.70758	1.78755	1.80704	1.20149	1.95239	0.431752	0.505078	1.25965
		2.21232	1.7688	1.65501	1.81788	2.04788	0.408968	0.458094	1.35103
		1.41253	1.63877	1.39417	1.98011	0.844956	0.418461	0.600417	1.44046
		1.94318	1.57427	1.90216	1.12671	1.12845	0.399279	0.491964	1.00334
		2.18004	1.75964	1.72305	1.47832	1.49137	0.476601	0.572877	1.22179
		1.57649	1.47174	2.10703	1.64215	0.936897	0.416038	0.67025	1.32794
		1.97391	1.73322	2.01471	1.47741	1.21349	0.399121	0.57659	1.5293
		1.73524	1.71117	1.8801	1.45398	1.41873	0.531627	0.791834	1.39869
		1.33023	1.79881	2.28733	1.76111	1.45324	0.466808	0.6025	1.38541
		2.17169	1.62893	1.80672	1.55854	1.24929	0.510553	0.472529	1.39233
		2.68927	1.34804	1.50329	1.44064	1.11546	0.52425	0.645817	1.39663
		2.31732	2.1526	1.52246	1.27453	0.994716	0.478878	0.440516	1.32381
		2.1361	1.78598	1.67837	1.77848	1.2453	0.541427	0.647389	0.685871
		1.66492	1.92742	0.596501	1.37027	1.64794	0.530844	0.689522	1.43129
		1.90463	2.28378	0.629838	1.4115	1.40553	0.591269	0.607847	1.163
		1.75844	2.1397	0.687043	1.45048	1.47182	0.552863	0.572145	1.40594
		1.58837	1.60599	0.539164	1.43148	1.03186	0.48438	0.448685	1.4857
		1.45859	1.52239	0.751618	1.36632	1.22048	0.547413	0.866984	0.777693
		1.83018	2.08467	0.598015	1.76133	0.978463	0.471451	0.450551	1.22635
		1.75304	1.68791	1.13447	1.53279	1.25141	0.531233	0.675209	1.26384
		2.32323	2.13259	0.595355	1.65643	1.21994	0.508652	0.551571	1.27147
		1.80785	2.06259	0.645439	1.49558	1.98952	0.41582	0.534652	1.19249
		1.99436	1.76062	0.955778	1.45946	1.15261	0.440545	0.374645	1.43028
		2.17728	1.97979	0.613959	1.51875	0.967358	0.540057	0.536841	1.30613
		1.76668	1.79817	0.823683	1.5846	1.53509	0.426469	0.515795	1.30995
		2.24477	1.89523	0.711335	1.56445	1.40831	0.456981	0.419654	1.39947
		1.52444	0.868669	0.580073	1.74095	1.54281	0.436491	0.43482	1.25426
		1.27007	0.780822	0.635018	1.84516	1.81498	0.428101	0.563866	1.47267
		1.84361	0.938386	0.939048	1.39841	1.35166	0.47468	0.648468	1.39464
		1.34891	0.859833	0.799051	1.46382	1.20982	0.453765	0.463629	1.19287
		1.98564	1.02355	0.596422	1.3758	1.35282	0.370078	0.579388	1.30857
		1.6461	1.16759	1.0307	1.67608	1.22584	0.489795	0.572347	1.20538
		1.46843	0.789354	0.846908	1.58674	1.45377	0.420012	0.557134	1.46168
		1.33961	0.89082	1.27625	1.53325	1.32478	0.462928	0.497638	1.36343
		1.10046	0.937094	0.693197	1.36533	1.415	0.499823	0.378916	1.37579
		1.2741	0.91866	0.940872	1.15305	1.32811	0.496147	0.560222	1.21076
		1.69338	0.921049	1.31232	1.36109	1.02696	0.561687	0.597364	1.47
		1.34909	0.769533	1.25418	1.33692	1.32561	0.455134	0.475203	1.36198
		1.74053	0.95921	0.873834	1.31171	1.0513	0.41954	0.389387	1.45512
		1.43349	0.848432	1.41708	1.26317	1.1662	0.420897	0.402035	1.48605
		1.16657	0.906472	1.15642	1.40927	1.13988	0.558543	0.430632	1.25224
		1.03746	0.889181	1.08063	1.04099	1.63084	0.526863	0.372862	1.40162
		1.8212	0.872774	0.303797	1.21898	1.34724	0.458484	0.447214	1.27878
		1.03726	0.922082	0.374604	1.33324	0.870462	0.446795	0.416895	1.24768
		0.63323	0.869828	0.328859	1.59598	0.791604	0.483979	0.512543	1.19239
		0.616279	0.887952	0.309773	1.0874	0.875201	0.505053	0.442145	1.22226
		1.1303	0.919351	0.324112	1.38413	0.771192	0.681157	0.542544	1.04876
		4.41709	0.746556	0.355506	1.28857	0.756264	0.511843	0.491995	0.982409
		3.86789	0.845697	0.265526	1.43885	0.47307	0.481648	0.669881	1.32645
		7.26142	1.04537	0.332587	1.24632	0.649121	0.51924	0.47814	1.22457
		4.01592	1.02995	0.305556	1.24632	0.643408	0.558701	0.382585	1.36445
		3.26117	1.20949	0.302355	0.60209	0.664962	0.480607	0.471126	1.30709
		3.66643	0.933022	0.317035	0.581796	0.278143	0.533193	0.412182	1.25633
		3.51424	0.999486	0.329833	0.627539	0.266521	0.450263	0.501825	1.44153
		3.35091	0.862802	0.691024	0.724123	0.19387	0.542278	0.595955	1.03817
		3.85726	0.884921	0.82682	0.666851	0.277014	0.532069	0.37004	1.32954
		3.32951	1.07126	0.719247	0.785953	0.389947	0.475183	0.368893	1.35511
		3.22353	0.927913	0.870038	0.638022	0.260182	0.532236	0.583964	1.38989
		2.72821	0.908344	0.818454	0.543534	0.191988	0.506948	0.474104	1.31267
		3.81314	0.80253	0.864793	0.724407	0.419411	0.515446	0.474367	1.4695
		3.36242	1.11872	0.748	0.524575	0.365886	0.603089	0.424546	1.39157
		2.85631	0.872852	0.863595	0.924616	0.503198	0.453613	0.495877	1.24219
		4.3683	0.786707	0.931728	0.722913	0.454269	0.612275	0.515919	1.19465
		2.83115	0.858461	1.10314	0.766779	0.456248	0.490697	0.504309	1.32949
		2.61111	0.785322	1.25676	0.99097	0.346364	0.457116	0.455125	1.14846
		4.7541	0.909405	1.00851	0.717029	0.380468	0.563977	0.469095	0.16457
		2.90694	0.810273	0.541817	0.682175	0.648374	0.55826	0.525461	0.110557
		2.83024	0.821227	0.812574	0.869289	0.680099	0.520658	0.431632	0.080989
		4.58333	0.916899	0.550391	0.606472	0.828589	0.45367	0.544087	0.103951
		4.68441	0.851103	0.564327	0.692639	0.812799	0.597219	0.428333	0.105121
		2.19123	0.846616	0.969559	0.707028	0.435731	0.626063	0.566274	0.157547
		2.75779	0.872119	0.812363	0.754379	0.662351	0.617896	0.477631	0.054528
		3.33749	0.879698	0.955452	0.681154	0.758889	0.504753	0.443607	0.063252
		2.76168	0.823648	0.677024	0.601275	0.348941	0.564029	0.398365	0.103585
		2.52253	0.867749	0.642329	0.7488	0.424557	0.528289	0.448597	0.089402
		2.45535	0.686478	1.05164	0.771805	0.377366	0.453926	0.402583	0.145665
		3.6168	0.676246	0.956783	0.761819	0.523733	0.50337	0.5875	0.133306
		4.02207	0.841452	0.829092	0.662418	0.369037	0.54286	0.44749	0.076845
		4.16743	0.75768	0.614064	0.635404	0.295801	0.41539	0.518572	0.106524
		4.18464	0.832531	0.909939	0.636234	0.229542	0.522567	0.464964	0.131033
		5.01474	0.743922	2.12697	0.772498	0.570831	0.533581	0.602872	0.08988
		2.70568	0.722465	1.86471	0.652168	0.454604	0.508935	0.608624	0.083651
		4.39899	0.770379	0.941054	0.68349	1.34724	0.577207	0.486208	0.139447
		3.02232	0.706932	1.32601	0.809218	1.80802	0.543837	0.372597	0.197752
		2.82582	0.757845	1.05837	0.763433	2.08285	0.508626	0.497297	0.164767
		3.36422	0.67328	1.38465	0.627672	1.90776	0.458304	0.545309	0.116563
		3.90584	0.644856	0.947715	0.715926	2.05857	0.530843	0.464235	0.133533
		2.39031	0.734829	0.840122	0.717931	2.79167	0.479285	0.482453	0.18551
		3.94818	0.767997	0.745722	0.696679	1.97666	0.49839	0.473101	0.146341
		3.87923	0.682361	2.01294	0.709747	1.70928	0.501914	0.516652	0.102759
		4.85422	0.864511	0.929466	0.650227	2.60433	0.445478	0.534909	0.165149
		3.0449	0.660734	1.57074	0.671326	1.82776	0.510798	0.552436	0.091089
		2.60875	0.800225	0.605738	0.688601	2.79167	0.541596	0.485651	0.086991
		3.44444	0.679574	0.713139	0.88365	1.89706	0.46357	0.506584	0.156735
		2.98087	0.864508	0.816521	0.724155	2.40999	0.566536	0.47327	0.078795
		2.74214	0.664336	0.961667	0.626944	1.65664	0.534197	0.428901	0.134225
		2.739	0.72438	0.760936	0.536277	2.49416	0.576497	0.689598	0.257515
		2.73618	0.809157	1.61269	0.78826	1.54459	0.441218	0.46119	0.156822
		2.88109	0.721303	1.23822	0.844765	2.11937	0.53109	0.518007	0.196384
		2.9925	0.517518	0.919746	0.814608	2.01395	0.152207	0.498249	0.173611
		2.62064	0.659721	0.766197	0.78023	1.70599	0.438144	0.465217	0.322975
		2.48866	0.685294	1.06081	0.787398	1.53405	0.376404	0.420527	0.076443
		3.07514	0.828676	1.84708	0.729484	1.60022	0.367864	0.505692	0.086449
		2.31667	0.745714	0.849854	0.756301	0.489488	0.388169	0.692694	0.122932
		0.839439	0.56489	0.797672	0.72239	0.603187	0.357177	0.889016	0.123593
		1.19798	0.632741	0.762641	0.71015	0.585533	0.290303	0.77262	0.139954
		2.52864	0.833176	0.867249	0.654273	0.64121	0.372508	0.94719	0.187085
		2.359	0.753918	0.862911	0.735747	0.701848	0.461874	0.97129	0.205841
		2.27054	0.804661	0.82656	0.592122	0.580037	0.504182	0.873936	0.207112
		2.77127	0.875319	1.14737	0.708185	0.617237	0.229617	1.24408	0.154317
		2.5859	0.765279	0.707406	0.626888	0.73653	0.544704	0.997352	0.152925
		2.7794	0.75372	0.787583	0.660501	0.725179	0.469035	0.701524	0.135269
		2.97934	0.727062	0.75721	0.754533	0.684942	0.468008	1.08489	0.188105
		2.32241	0.668964	0.85332	0.833311	0.675831	0.522432	0.970553	0.174961
		2.42321	0.768576	0.84886	0.651952	0.603154	0.505923	0.878708	0.258285
		2.46454	0.873184	0.836498	0.58728	0.759123	0.543901	0.801663	0.113226
		2.75065	0.814149	0.929966	1.43182	0.51591	0.549292	1.56762	0.231934
		2.75982	0.812566	1.38623	1.55946	0.694833	0.495642	0.750816	0.071593
		2.57248	0.666789	0.972028	1.1433	0.501255	0.368416	1.1279	0.214748
		2.37986	0.780565	0.708235	1.38383	0.493336	0.550153	0.75731	0.19275
		3.04129	0.796597	0.796029	1.52241	0.541118	0.470327	1.09018	0.124842
		2.36455	0.905693	0.712726	1.108	0.548431	0.527214	0.791295	0.129225
		2.48297	0.725251	1.35615	1.48043	0.625554	0.508021	0.859546	0.08195
		3.15189	0.917658	0.694944	1.43195	0.620199	0.605748	0.73112	0.211372
		2.72484	0.885837	1.13103	1.38706	0.628909	0.574924	0.745308	0.101961
		2.83917	0.876777	0.982226	1.52418	0.714572	0.480417	0.765374	0.105727
		2.46396	0.872311	0.89478	1.18962	0.607572	0.588035	1.23534	0.206555
		2.25404	0.845638	0.792526	1.45822	0.675882	0.460419	0.784703	0.246131
		2.09191	0.47947	0.752864	1.27412	0.72192	0.557095	0.984047	0.148966
		2.47746	0.848416	1.58975	1.58996	1.13938	0.700342	0.679658	0.13728
		2.90714	0.755416	1.527	1.28667	0.785548	0.524561	0.832626	0.142136
		3.30614	0.790222	1.42465	1.63731	0.744457	0.551118	0.846154	0.114362
		2.67188	0.846883	1.31212	1.33963	0.782333	0.511452	0.735925	0.248057
		2.59966	0.646709	2.01966	1.95174	0.702439	0.699239	1.22955	0.173691
		3.29387	0.592873	1.53049	1.70702	1.693	0.601986	0.998864	0.183606
		2.89542	0.545893	1.81752	1.63801	0.680921	0.572123	0.992347	0.153268
		2.75	0.508831	1.82102	1.39855	0.789045	0.579187	0.817223	0.124145
		2.7198	0.674361	1.70985	1.80298	0.71826	0.490718	0.583373	0.0819
		3.51681	0.6817	1.56721	1.46287	0.678187	0.473186	0.716309	0.151821
		3.5591	0.266842	1.36641	1.65945	0.776892	0.703572	0.599928	0.183775
		2.26747	0.275689	2.15909	1.65528	0.717905	0.579696	0.76046	0.142178
		2.41755	0.256154	2.5062	1.18756	0.721429	0.545043	0.700649	0.117456
		3.13111	0.176851	1.50716	1.05857	1.16708	0.637628	0.541251	0.113414
		3.13731	0.333134	1.79771	1.51604	1.03525	0.505109	0.636364	0.226111
		2.84035	0.301842	1.582	1.51676	0.619163	0.566152	0.603154	0.115554
		2.26403	0.224088	1.7417	1.41086	1.312	0.538931	0.585962	0.146622
		2.20397	0.310851	1.36544	1.54132	1.39359	0.55676	0.585247	0.115944
		2.77969	0.233561	1.58905	1.69753	0.803935	0.523996	0.706144	0.137886
		2.40585	0.315259	1.70403	1.46077	0.818125	0.571018	0.471064	0.144963
		2.53715	0.369023	1.62545	1.68428	1.18851	0.532618	0.635	0.149972
		2.0678	0.431772	1.3729	1.80851	0.66991	0.769044	0.602697	0.272348
		2.62016	0.359469	1.561	1.34665	0.863094	0.510878	0.63457	0.251525
		2.59648	0.304277	1.74839	1.58057	0.844619	0.561316	0.680992	0.199142
		2.33588	0.32291	1.58298	2.21437	0.773046	0.552191	0.67067	0.18561
		3.13425	0.326146	2.21007	1.64796	0.791471	0.471009	0.675926	0.203289
		2.6296	0.261344	0.941277	1.53415	0.785351	0.628196	0.996547	0.156303
		2.79207	0.323468	1.58877	1.5129	0.879062	0.489784	0.662551	0.225806
		2.45859	0.335261	1.4503	1.82552	1.14164	0.523435	0.730641	0.174992
		2.08212	0.406865	1.01349	1.62894	0.607077	0.600216	0.700214	0.140155
		2.40051	0.322773	1.137	1.62432	0.875121	0.677121	0.585799	0.219295
		2.16051	0.283774	1.72427	1.44238	1.32531	0.529937	0.702855	0.227938
		2.30191	0.3218	1.30928	1.1333	0.730448	0.510251	0.607143	0.133522
		2.07929	0.308195	0.980435	1.4757	0.790728	0.540098	0.542689	0.144564
		2.39915	0.476878	1.91755	1.09293	0.914265	0.521502	0.695985	0.183448
		3.06583	0.361359	0.918991	1.1476	1.05901	0.658378	0.84741	0.135254
		1.14903	0.415138	0.871199	1.91252	0.910903	0.573635	0.790222	0.138185
		0.912684	0.428298	1.06935	1.14347	1.10909	0.678542	0.99846	0.147125
		1.35329	0.361362	1.25071	1.24183	0.875966	0.605434	0.910874	0.178489
		1.80312	0.421186	1.24402	1.25676	0.807269	0.687205	0.577701	0.235226
		1.17859	0.443247	1.97924	1.11369	1.25356	0.50805	0.604949	0.157075
		1.68952	0.40127	1.42706	1.51676	0.793545	0.584616	0.667986	0.134395
		1.22344	0.282276	1.39674	1.32921	0.928278	0.543897	0.890956	0.183308
		1.47544	0.197381	1.2302	1.20991	0.749699	0.626532	1.25424	0.143563
		1.56449	0.189408	0.948731	1.1256	0.906856	0.538591	0.760517	0.152833
		1.1171	0.258535	0.872453	2.09975	1.70522	0.744773	0.920892	0.097525
		1.0549	0.210228	3.69298	1.39827	1.94946	0.685998	0.824688	0.11993
		1.45454	0.214842	0.90469	1.37946	1.64028	0.537516	0.689504	0.239539
		1.55011	0.312531	1.09083	1.78948	1.1206	0.644302	0.926887	0.101021
		1.55764	0.230203	0.912336	1.44408	1.44545	0.466771	1.20535	0.184625
		1.23818	0.34072	0.947607	1.17703	1.26991	0.445848	0.727184	0.159785
		1.18667	0.398558	1.00456	0.965323	1.46283	0.498476	0.641871	0.232697
		1.47818	0.259588	1.39073	1.34461	1.15985	0.471262	0.678112	0.088765
		1.23141	0.307858	1.46694	0.962512	1.08733	0.442301	0.982389	0.211183
		1.40807	1.87272	1.26226	1.03917	1.40823	0.298209	1.06114	0.144948
		1.53773	1.87031	1.36595	1.22219	1.29444	0.385406	0.797001	0.088782
		1.18269	1.7648	1.74519	1.27718	1.57349	0.573023	0.612878	0.127891
		1.21725	1.66096	1.68358	1.2643	1.14083	0.302836	0.968062	0.198441
		1.41126	1.59733	1.35634	1.02319	1.04118	0.61306	0.669089	0.147695
		1.6021	1.5924	1.51636	1.22031	1.31593	0.524516	1.0039	0.080379
		1.18973	1.9949	1.80491	1.16986	0.863289	0.286734	0.685451	0.061055
		1.13414	1.88876	1.39247	0.909048	0.939309	0.330996	0.638298	0.375813
		1.1019	2.10325	1.40468	1.35823	2.70657	0.406612	1.20458	0.605163
		1.1179	2.10317	1.38077	1.18714	2.01832	0.401213	0.728336	0.556966
		0.541041	1.60155	1.25826	1.01306	1.29458	1.04052	0.979452	0.658055
		0.651393	1.54273	1.54685	1.24473	1.4745	1.12511	1.12653	0.663717
		0.483511	1.52297	1.445	0.960865	0.948847	1.0492	0.923077	0.335185
		2.65099	1.96346	1.37292	1.13099	1.28311	1.16906	0.839562	0.699351
		2.05419	1.52546	1.50651	1.27361	1.78426	1.20284	0.684761	0.525143
		2.02628	1.40904	1.73406	1.13088	0.915288	1.05993	0.227739	0.734411
		1.5922	1.97165	1.66804	1.02026	1.9203	1.09386	0.201217	0.687594
		2.11344	1.6048	2.08758	1.34529	2.33743	1.16261	0.241396	0.59009
		1.97647	1.23432	2.33878	1.42926	1.05278	1.04223	0.15854	0.43191
		1.77778	1.75782	1.99481	1.19875	0.89083	0.945878	0.175034	0.673706
		1.81267	1.26261	0.529076	1.25655	1.21343	1.05409	0.13284	0.548215
		1.89705	1.3979	0.626078	1.34463	1.32574	1.22147	0.116671	0.610432
		2.19805	1.34507	0.625097	1.27933	2.18738	1.06098	0.236957	0.743565
		2.35215	1.56906	0.548255	2.98416	1.31585	0.898012	0.210994	0.695114
		1.65505	1.66375	0.595204	3.06043	1.90894	1.02433	0.135908	0.736398
		2.28222	1.66375	1.0185	2.85368	1.61373	1.10859	0.300408	0.701561
		2.30749	0.639189	0.562293	3.44518	2.8292	1.10928	0.216883	0.608417
		1.86937	0.603087	0.653536	3.09442	0.876771	0.985695	0.178322	0.644507
		2.08	0.497008	0.928549	3.61819	0.856538	0.997314	0.249197	0.635876
		3.26389	0.439747	0.656614	2.9961	2.15855	1.15695	0.105172	0.774778
		1.57403	0.54805	0.608868	2.74213	0.964516	1.07828	0.160494	0.75834
		2.05161	0.426557	0.666518	3.02575	1.64896	0.945955	0.349297	0.707583
		2.07207	0.41374	0.722314	2.82774	1.35083	1.17617	0.160578	0.867123
		2.23479	0.526771	0.746522	3.35617	2.01	1.0147	0.121226	0.636944
		2.1318	0.382537	0.515965	3.17264	1.07932	0.868517	0.221317	0.888935
		2.03641	0.545281	0.85577	3.24795	2.24945	1.05306	0.147262	0.703744
		2.07787	0.435333	1.17809	3.13506	2.10704	0.847412	0.215487	0.586569
		2.05667	0.537281	0.80678	3.21768	1.39173	0.869108	0.158053	0.667605
		2.45068	0.39078	1.00465	3.75327	2.02926	1.01048	0.298037	0.559904
		2.29717	0.438257	0.647013	3.25327	1.32674	0.823009	0.256588	0.54916
		1.95048	0.449505	0.646911	3.57452	1.85401	0.912409	0.213442	0.632791
		2.35693	0.340313	0.681209	3.42135	1.38142	1.11949	0.4545	0.642535
		2.39543	0.438848	0.748926	3.05802	1.57481	1.18852	0.275917	0.463372
		2.32634	0.557828	0.748654	3.06286	1.26603	1.08536	0.127074	0.439841
		2.32073	0.441652	0.954387	2.60426	1.52673	1.07311	0.240026	0.557654
		1.91293	0.565892	1.32886	3.3622	1.27083	0.911872	0.194794	0.678439
		2.592	0.504892	0.965629	3.45492	1.57587	0.927413	0.180035	0.73434
		2.18133	0.343298	0.83091	2.92296	0.755906	0.873424	0.243059	0.593303
		1.79806	0.452387	0.867515	2.99842	1.57956	1.00298	0.263467	0.477996
		1.78282	0.491245	0.849231	3.32644	1.38167	0.900382	0.178012	0.591076
		2.27633	0.53896	0.811127	3.15408	1.11786	0.947146	0.225554	0.679833
		2.3446	0.343697	0.526066	3.02756	0.664336	0.967843	0.26242	0.480857
		1.97648	0.559442	1.53143	2.92527	1.85252	0.925414	0.142002	0.448936
		1.8626	0.474784	0.652145	3.65179	2.26696	1.1386	0.255311	0.596286
		2.76835	0.441478	0.752286	2.9359	1.28298	1.05058	0.20432	0.572127
		2.7627	0.572792	0.834653	3.24351	1.50369	1.62982	0.290558	0.544033
		1.86584	0.470169	1.04918	2.52624	1.39718	0.974979	0.201432	0.706715
		1.59649	0.612063	0.730881	3.95762	2.16239	0.968036	0.25689	0.48081
		1.95259	0.403412	0.75472	2.87742	1.28831	1.24595	0.186916	0.548404
		1.84359	0.425209	0.624717	2.99609	1.66524	1.0551	0.41084	0.441936
		1.49834	0.452885	1.03911	3.58855	1.18474	0.888634	0.097939	0.373298
		1.87047	0.399853	0.971182	3.17224	1.76127	0.862252	0.22249	0.368549
		1.99222	0.465047	0.799208	2.99019	1.67524	1.03985	0.198198	0.459177
		1.40706	0.415155	0.707099	3.17096	1.23243	0.899894	0.291632	0.483243
		1.82007	0.604053	1.13641	2.97205	2.03084	0.854435	0.273105	0.491369
		1.56562	0.439605	0.680239	3.02342	1.33333	0.928988	0.287814	0.446707
		2.08236	0.439605	0.336568	2.92569	1.33333	1.01934	0.329243	0.392089
		1.64629	0.661906	2.95913	3.25508	0.493704	0.864164	0.25765	0.485722
		2.11154	0.658943	3.78951	2.75703	0.537789	0.909733	0.170326	0.444944
		1.51192	0.597786	2.96053	2.88208	0.522921	0.961714	0.312269	0.521156
		1.91753	0.526702	3.44508	3.2435	0.559401	0.889879	0.286848	0.520857
		1.98875	0.537117	3.75767	2.81034	0.432398	1.04989	0.559545	0.501209
		2.08866	0.575116	4.23067	2.80945	0.474269	1.16372	0.561768	0.407201
		2.29609	0.596556	3.76006	2.92313	0.473314	1.03529	0.578544	0.38858
		2.1639	0.567178	2.4749	3.44644	0.525316	0.93229	0.642783	0.488839
		1.81081	0.567844	3.16235	2.99821	0.381496	0.917511	0.823485	0.334267
		1.71478	0.671618	3.20126	2.77245	0.47755	0.924293	0.669959	0.41983
		2.47374	0.577937	3.44129	3.64593	0.405347	0.932243	0.649892	0.320624
		2.67638	0.545806	3.25031	3.20783	0.410861	1.06877	0.548627	0.361047
		2.96684	0.608916	2.315	3.9702	0.48607	1.12086	0.688557	0.654106
		2.16288	0.849951	2.73862	2.87438	0.497342	1.19982	0.884885	0.547474
		2	0.786722	2.90019	2.68648	0.443473	1.08396	0.979883	0.532645
		2.28772	0.696645	3.11614	2.58174	0.406549	1.03494	0.734919	0.704955
		2.45353	0.702343	4.59762	2.73775	0.493498	1.39997	0.655185	0.60194
		2.16807	0.593047	2.74449	3.05251	0.455017	1.04992	0.583619	0.565758
		1.98704	0.539452	3.17944	3.16162	0.472411	0.96539	0.605004	0.832545
		2.46974	0.785219	3.42686	3.00365	0.687256	1.19344	0.676943	0.411123
		2.07775	0.843096	3.50768	3.36517	0.564043	1.00972	0.855718	0.512404
		3.14079	0.550945	3.0479	2.58873	0.667331	0.980088	0.658393	0.571907
		2.36342	0.812445	2.55192	2.76982	0.388694	1.04377	0.716739	0.629622
		2.41643	0.644921	2.44291	3.05295	0.454731	1.00585	0.633701	0.66187
		2.41228	0.695767	3.89653	2.93958	0.492002	1.14281	0.731332	0.536733
		2.17342	0.711966	4.51686	2.61038	0.593637	1.15019	0.777567	0.880037
		2.37692	0.975918	2.71192	2.71635	0.688622	1.03754	0.771524	0.678884
		2.45657	0.84507	2.72756	2.74068	0.47484	1.07402	0.629464	0.54853
		2.03196	0.84802	4.68776	2.64138	0.417139	1.05305	0.74239	0.599138
		2.342	0.772211	3.60809	2.31495	0.576862	0.922926	0.682122	0.542416
		1.77925	0.610136	3.40633	2.55092	0.602295	0.950935	0.667543	0.590389
		2.60942	0.636217	2.85012	2.68899	0.461521	1.15027	0.792793	0.496503
		2.89379	0.76121	3.7376	3.53573	0.493715	1.04396	0.561938	0.378272
		3.20861	0.928721	4.1967	3.07415	0.515638	1.0923	0.8379	0.38871
		2.43261	0.875601	2.13339	2.3218	0.388715	0.877733	0.745981	0.423813
		2.60957	0.835995	4.47405	3.07152	0.466352	0.924351	0.850258	0.379457
		2.12795	0.894231	3.18309	2.50257	0.373315	1.03397	0.96544	0.397939
		2.48756	0.374513	2.76088	2.50696	0.506439	1.35637	1.1497	0.570616
		2.84697	0.768948	2.29859		0.452065	1.11311	0.673203	0.603265
		2.75455	0.65577	2.88815		0.397504	1.00906	0.762959	0.329885
		2.37576	0.573283	3.18473		0.446476	1.07391	0.80274	0.857909
		2.33854	0.612695	4.08728		0.523629	1.13627	0.50936	0.355885
		3.12666	0.617664	4.95694		0.389459	1.16601	0.616208	0.872121
		2.60713	0.852277	3.00705		0.52024	0.765373	0.710802	0.713642
		2.85258	0.65067	3.92114		0.54044	1.02074	0.996228	0.415171
		3.7572	0.715543	3.54106		0.431516	0.873198	0.720396	0.508272
		2.18207	0.7014	2.27244		0.470956	0.765856	0.772847	0.341123
		3.13815	0.746932	1.83401		0.662069	1.10826	1.01938	0.319764
		3.68759	0.645303	2.18195		0.538606	1.20431	0.647423	0.88702
		1.68633	0.618774	2.66365		0.528736	1.1711	0.81634	0.374153
		3.24809	0.584763	1.77338		0.567128		0.856738	0.698248
		4.4814	0.71062	1.84527		0.617269		0.564831	0.34514
		3.50369	0.546923	1.86938		0.542327		0.792033	0.414594
		4.10174	0.910992	2.13599		0.652785		0.966783	0.696926
		3.67718	0.604088	2.20916		0.514996		0.629551	0.542543
		2.93583	0.648094	2.49856		0.702789		0.700973	0.483994
		4.02928	0.544651	2.64128		0.544298		0.674507	0.354126
		3.463	0.885569	2.71046		0.667746		0.615939	0.639907
		3.11337	0.626209	2.85448		0.588998		0.742027	0.543099
		3.01521	0.627154	3.22978		0.594295		0.688812	0.790615
		3.73536	0.741201	1.92599		0.683841		0.785024	1.12482
		2.58469	0.565217	1.97996		0.774492		0.917686	1.24263
		3.32642	0.786404	2.36931		0.731589		0.710806	1.71669
		2.55217	0.757629	1.05629		0.697474		0.825243	1.62958
		2.3213	0.58441	1.53728		0.711717		0.602	2.16405
		2.26463	0.519331	1.9039		0.890849		0.66547	2.08684
		2.14021	0.650709	2.05076		0.824377		0.728462	1.6889
		3.51474	0.892308	1.76611		0.988964		0.594017	0.986647
		2.76601	0.549445	2.08075		0.984496		0.927086	2.20757
		2.58364	0.656993	1.93847		0.687346		0.693709	1.66711
		3.48952	0.619289	2.19122		0.728986		0.665003	1.95353
		2.58015	0.90413	1.55552		0.965431		0.658424	1.47993
		2.34256	0.693453	1.84419		0.713057		0.714013	2.12269
		2.15045	0.776808	1.6908		0.525264		0.64805	1.73006
		2.84775	1.73442	2.3813		0.745123		0.651421	1.74849
		2.30467	1.54655	2.16436		0.432886		0.852294	2.1647
		2.49781	1.36127	1.74107		0.679621		0.665376	1.81988
		2.97539	1.29121	1.89187		0.747835		0.551385	1.13179
		2.74145	2.73179	1.68276		0.569343		0.606898	1.78608
		2.87796	1.72826	1.76239		0.534928		0.606898	1.80516
		2.49795	1.46225	2.1355		0.440937		1.27193	2.07079
		3.48414	1.51161	1.4778		0.417296		1.00301	1.86088
		2.87014	1.87575	1.65385		0.580779		0.877078	1.72617
		3.02492	2.01005	1.83545		0.577024		1.0284	1.4899
		3.56654	1.79689	1.78198		0.445478		1.02163	1.43072
		3.20888	1.40173	1.60854		0.462963		1.46959	1.71538
		2.67254	1.19595	1.76001		0.473464		1.35849	1.60987
		3.2781	1.98438	1.96004		0.514771		1.06762	2.19777
		3.61061	1.86198	1.61571		0.556366		1.16511	1.56342
		2.6529	2.16147	2.10763		0.654765		1.11076	1.80099
		3.49898	1.20693	1.92514		0.374776		0.948661	1.33035
		2.8006	1.47081	2.00852		0.452444		1.80917	1.80702
		3.39635	1.15232	1.71454		0.453935		1.65992	1.31762
		4.35948	1.42741	1.54859		0.261927		1.59642	1.32105
		2.55514	1.8284	1.8007		0.229733		1.64754	1.15548
		3.46145	1.60514	1.74808				1.13885	1.70286
		2.8218	1.86155	1.6451				1.87581	1.83675
		2.98406	1.31299	1.68261				1.46936	2.07755
		2.97136	1.46242	1.76934				1.26115	1.10357
		3.6355	1.83993	1.25449				0.806167	1.63366
		2.90439	1.27824	2.84329				0.87408	1.70258
		2.76938	1.77273	2.54896				1.39188	1.71966
		3.12237	1.22043	2.34615				1	1.29787
		2.85006	1.39668	3.6213				1.00709	1.71731
		2.89952	1.83289	2.60271				1.05421	1.34385
		2.43428	2.48934	2.49251				1.30735	2.134
		2.20265	1.95162	2.79275				1.33164	1.9039
		2.22112	1.85106	2.2447				1.59417	1.35093
		1.53268	2.3464	2.43021				1.30441	1.27844
		1.66562	2.15524	3.65705				0.971005	2.01283
		2.39611	1.76308	2.5174				1.14428	1.44795
		2.18657	1.48599	3.3694				1.105	1.90613
		1.56065	1.98064	2.37624				1.28041	1.4905
		1.51371	2.13659	2.26202				1.401	1.50777
		1.83458	2.25995	2.44376				1.27273	1.79208
		1.76278	1.56092	2.90083				1.85913	1.04938
		2.32685	1.74628	2.23502				0.811293	1.28222
		2.11565	1.41679	2.44219				1.60313	1.77185
		1.94983	1.69263	2.87276				0.850394	1.16409
		1.87771	1.2015	2.41353				1.08359	0.845361
		2.35491	1.15385	2.30723				1.16005	0.558429
		1.84226	2.21896	2.37347				1.12862	0.748958
		2.06652	2.04878	2.96319				1.22738	0.840117
		2.71438	1.94249	2.36364				1.25615	0.873245
		2.08405	2.36676	2.28564					0.751255
		1.86014	1.32857	3.45158					0.71253
		1.69488	1.3766	3.21677					0.845836
		1.87511	1.96108	2.49686					0.67683
		1.57475	1.52427	2.28927					0.707775
		1.72	1.25809	4.3801					0.326198
		1.72195	1.42504	2.69416					0.74201
		2.59872	1.84624	2.79139					0.324756
		2.07828	1.49308	2.25013					0.900592
		2.48548	1.27939	3.05574					0.944352
		2.72174	1.06195	2.30152					0.900597
		1.9687	1.83505	2.19001					0.592814
		2.20245	1.1855	2.57743					0.647912
		1.82642	1.98424	3.21701					0.862925
		2.14198	1.51214	2.59168					0.659608
		1.92308	1.16218	3.20938					0.867316
		2.55736	1.1477	3.38876					0.687286
		2.53119	1.63451	2.54396					0.90251
		2.63386	1.61203	2.59173					0.947165
		2.63865	1.56157	3.3681					0.599808
		1.86849	1.5849	2.50908					0.652082
		1.76369	1.71906	2.76027					0.812364
		2.67409	1.9529	3.59802					0.578572
		1.83003	2.26846	3.05088					0.701762
		1.4548	1.93303	2.94558					0.555016
		2.36707	1.60208	2.16667					0.561855
		2.25222	1.17936	2.38386					0.847
		1.83401	1.80241	2.61757					0.737321
		1.55922	1.61609	2.63139					0.833048
		1.77078	1.76577	2.62305					0.785296
		1.88172	1.88616	2.85925					0.602484
		2.04923	2.04531	2.74815					0.684214
		1.52797	1.83962	2.83333					0.780058
		1.70564	1.55253	2.53736					0.689064
		2.09723	2.18576	2.72596					1.12038
		2.15092	1.58748	2.73986					0.715774
		2.06718	1.64765	2.50829					0.856719
		1.55514	1.7351	3.31218					0.589442
		2.18219	1.69085	2.78517					0.851592
		1.96725	0.41169	2.19706					0.642621
		1.80651	0.457266	2.65176					0.553007
		1.99389	0.499266	3.19277					0.720593
		2.03917	0.520571	3.82755					0.845572
		1.26851	0.639402	3.27086					0.631678
		1.30334	0.433007	2.42955					1.14844
		1.49192	0.438341	2.17529					0.909098
		1.36294	0.390516	2.73721					0.880795
		1.43748	0.419436	2.34268
		1.73144	0.398244	2.78286
		1.07389	0.501723	2.76632
		1.80143	0.460134	2.68401
		1.73003	0.830131	2.1235
		1.31365	0.54783	2.90217
		1.6029	0.482041	2.89299
		1.39139	0.468419	2.2795
		1.22744	0.387929	2.16505
		1.22891	0.709091	2.06968
		1.25814	0.416596	2.74365
		1.18931	0.635598	2.66159
		1.2126	0.477654	2.2819
		1.22805	0.619896	2.47386
		1.16667	0.48833	2.26407
		1.46951	0.619832	2.58713
		1.4629	0.443221	2.15844
		1.42857	0.482521	2.33478
		1.47149	0.437249	2.50028
		1.48006	0.425008	2.54555
		1.56957	0.546983	2.54424
		0.992649	0.487556	2.32536
		1.71772	0.532601	2.96458
		1.35636	0.510781	2.52447
		1.07709	0.442417	2.51331
			0.590481	2.86672
			0.344316	2.22815
			0.441188	3.2011
			0.505195	3.21548
			0.446493	2.67498
			0.397601	2.60176
			0.452115	2.50691
			0.415511	2.58825
			0.375192	2.45433
			0.384178	2.48458
			0.42848	2.56385
			0.407022	2.61097
			0.34077	2.18867
			0.431148	2.28157
			0.463261	2.76004
			0.44607	2.75124
			0.429559	2.4498
			0.455481	2.32934
			0.52651	2.6712
			0.425301	2.9133
			0.578154	2.10866
			0.465582	3.35877
			0.461289	2.76276
			0.538026	2.55818
			0.456746	2.01632
			0.507004	2.05181
			0.440775	2.1196
			0.577714	2.95322
			0.405669	2.83825
			0.579832	2.35059
			0.476632	1.88425
			0.490629	3.42874
			0.533976	2.30092
			0.433953	1.6376
			0.538648	2.41387
			0.436893	2.47569
			0.6365	3.80928
			0.427887	2.15376
			0.60479	2.02783
			0.362924	2.89859
			0.487537	2.10644
			0.453154	1.77043
			0.482183	2.52452
			0.539258	2.55788
			0.551059	1.75911
			0.47328	2.85685
			0.494616	1.82546
			0.417844	2.32257
			0.534341	2.93669
			0.476923	2.13855
			0.428052	2.86245
			0.441444	2.24592
			0.665478	1.94336
			0.420734	2.63829
			0.555556	1.82744
				2.01357
				2.71459
				2.33898
				3.693
				3.42712
				1.85599
				2.47153
				1.96145
				1.76391
				1.78423
				1.84398
				2.13248
				1.81893
				1.81006
				2.00883
				1.73848
				3.00289
				1.77128
				1.89976
				2.50519
				2.16617
				1.96002
				1.83547
				1.91663
				2.41217
				1.73008
				2.35571
				1.81584
				1.8617
				2.81727
				2.42748
				2.3437
				3.36889
				2.69231
				3.38821
				2.50558
				2.71927
				4.08168
				2.96733
				1.98294
				3.15462
				2.34455
				2.02812
				2.32017
				4.11997
				2.42114
				2.85279
				2.59967
				2.50576
				2.07837
				2.31192
				2.7282
				2.33548
				2.92202
				3.33272
				3.72943
				2.16489
				2.48612
				2.49225
				2.85197
				2.22874
				1.998
				3.72662
				3.27008
				2.19909
				3.97855
				1.76052
				3.22875
				2.43901
				2.28501
				2.28431
				2.42078
				3.14286
				2.07217
				2.80949
				2.66714
				2.34542
				2.1087
				2.87176
				2.15882
				4.1967
				2.83607
				2.79482
				3.35859
				2.994
				3.71524
				3.31779
				2.95144
				3.41639
				3.22222
				5.72222
				4.90369

## Sheet: Figure 9-S1Z-mature CPL-1
			% mature CPL-1
			WT			cup-5(bp510)
		Day 1	66.5486	78.1166	71.0888	39.5075	60.4863	61.1698
		Day 3	73.8123	62.8763	75.3641	58.4434	52.5811	40.7875
		Day 5	43.8549	45.3427	50.725	31.3376	28.6245	28.8823
		Day 9	44.1389	38.3704	40.2958	22.1302	30.3527	17.0555
			The numerical data are analyzed by GraphPad Prism 6 and represented as a bar graph in Figure 9-figure supplement 1Z.
