# Supplementary material for: Lysosome activity is modulated by multiple longevity pathways and is important for lifespan extension in C. elegans
Source: eLife. 2020 Jun 2;9:e55745. doi: 10.7554/eLife.55745 (PMC7274789; doi:10.7554/eLife.55745)
Supplement: Figure 9—source data 1. [file elife-55745-fig9-data1.xlsx]

## Sheet: Figure 9I-Day 1 intensity
	Mean intensity of NMY-2 at Day 1
	WT	cup-5	daf-2	daf-2cup-5
	9	11.8	15	30.9
	10.8	11.7	10.7	25
	11.2	14	11	29
	8.3	13.9	10.9	32.7
	11.5	12.6	9.4	28
	8.6	15.3	7	23
	13.8	13.3	10	27.5	The numerical data are analyzed by GraphPad Prism 6 and represented as a bar graph in Figure 9I.
	11	15.3	4.8	39
	12.66	12.5	7.3	34
	12.8	11	8	39
	6	10	8.7	22.4
	5	10	10	16
	6	13	7.5	26
	13	9	10.4	31
	10.6	9	7.8	17.6
	11.5	12	11.5	18.3
	13	9	11	22
	10	20.6	3.6	26.7
	14	15.5	8.4	29.4
	14	15.9	8.4	18
	11.5	13.2	12.9	15.8
	7	20	13	20
	10	23	5.3	23.5
	11.8	28.6	9	28.5
	12.2	24	9.5	24.5
	9	15	9.3	29
	8.5	24	10.7	35
	8.9	22.3	11.2	31.9
	11	28.7	14	34.4
	11.2	23.5	7.9	17.8
	9.7	12	8.9	20
	8.3	14	8.6	23
	12.4	15	10	16.8
	9.6	13	16.8	20.3
	8.7	17	15	20.6
	6.4	13	17	25.6
	6	14	7	34.8
	13.8	15	9.7	39
	11.5	15	14	35
	12	17	11.4	16
	4	23	10	21.8
	5	13	12	23.5
	3	15	12	30.6
	11	14	11.7	26
	10.5	16	10	20.8
	10	15.7	15	24.5
	6	14	14	30.6
	8	14.5	11	23
	18	19.5	8.4	29
	14	15	10	26.5
	15	20.7	11	31
	10.5	14	14	26
	9	14	14	31
	11.6	14.9	11	25.9
	8.8	24	13	30
	8.8	14	11	28.8
	7	15	11	29
	8	14.9	12	31
	9	17.9	10	25
	8.5	17	13	28

## Sheet: Figure 9J-Day 5 intensity
Mean intensity of NMY-2 at Day 5
WT	daf-2	cup-5	daf-2cup-5
14.9	6.4	19	28.6
14.2	6.9	19	26.5
14	8.9	21	29
17	9.4	17	38
17	9.9	15	39
10.6	10.3	33	38
20.5	6.8	24.6	38
16.7	10	25.9	40
17.8	11.8	26	44
11	15	28.5	42
14	10.8	17.5	40
14.8	15	22	40
18	9.3	17	34
16	15	25.6	35
16.5	6.8	32	37	The numerical data are analyzed by GraphPad Prism 6 and represented as a bar graph in Figure 9J.
16	14.5	30	45
15.7	14	16	44
20	15	19	40
15.8	16	25	49
17.5	12.3	17	49
15.8	18	20	47
15.3	15	19	42
17	17.3	25	28
14	21	32	42.6
15	17.7	23	45
12	13.9	24	42
15	18.5	22	36
11.5	20	28	41
15	14.4	21	42
13	23	18	43
16.7	18	23	28
10.5	23	18	42
12.2	21	15	37
10.6	19	18	30
14.7	20	15	43
10.8	20	20	52
20.6	20.5	24	39.8
17.4	21.7	26	36.9
20.6	19.2	16.3	34.5
15	23.3	26	36
14.5	14.2	25	33.7
13.9	14.3	18	32.4
14.3	19	22.7	35.8
19	19.5	25.9	45
16	15.3	29.2	39
20	18.3	18.6	33.8
19.7	22	16	41
18.8	14.4	20	45
15	9	20.4	32.6
14.5	10	27.4	36.7
16.3	12	31	36
13.3	15	22.6	42
19.5	17	26.4	40
22	15.8	27.8	39
16	19.6	22.5	35
16	8.9	20.4	38
16	14.7	23.3	29
19	13.8	27.8	40
15	16.9	16.3	46
11	17.6	20	41
7.2	19	15.4	23
8.7	17.8	25.5	32
10.5	12.6	18.6	27
11.2	17.3	18	36.8
9.6	14.4	17	38
11.3	18.8	17.8	56
8	14	22	38.9
12.8	16.5	21.3	52.7
11.7	18	20.5	39.8
11.3	6.9	13	34
22	13.3	13.5	36.8
23.7	13.5	17.8	42
18.8	13.3	14	54
14.6	16.7	15	51.8
15	16	18	55.8
15	10.4	15	35.6
17.2	7.2	20	25.7
16.2	9	15.6	47.5
16	13.9	19.5	38.7
16.5	13	29	47.5
17.5	18	32.8	50.7
23.7	9.6	16	23.2
17.4	13.6	21.3	28.9
13.7	7.7	18.4	45.7
17.9	8.8	18	29
8.8	13.7	19.8	47.6
13.5	9.9	20.8	50
12.4	11.2	22.2	39.3
12.8	10	18.9	47.6
13	11.7	23.5	53
12.4	7	13.3	33
10.1	9.7	13.6	45
10.5	7.5	18.8	45.6
13.6	11.4	15	41
26.8	10.8	14.4	44.7
22.3	13.1	17.4	54.7
16.9	9.6	16.8	23.5
14	8.5	17.4	23
15.3	10	21.6	32
20.4	4.9	29.1	25
11.7	10	33.3	32
13.7	7	29.2	35
16.2	10.6	16.8	26
13.5	13.8	21.8	35.5
10	14.7	27.6	41.8
12.4	8.6	19.3	31
19.7	9	17.2	33
20.8	11	15.9	52.4
20.6	10.9	16	28.3
15	10.7	16.7	23.1
19.5	9.1	15.8	33
17.8	10.6	18	34.4
15.5	8.5	18.9	36.9
16.2	9.2	21.8	38.9
16	12.3	29.2	24
17.2	16.6	25.3	26
17	17	33.5	33
18.3	13.1	18	30
11.7	14.1	16	32.8
15.1	14.7	16	47.3
17.3	11.8	19	45.5
13	9.8	25	57
14.9	14	22	50
11.7	9.2	15.4	34.9
12.2	12.7	17.3	27
18.3	10.6	15	38
13.8	13.9	21.3	41
15	14	29.4	30
15.8	16.8	25	47.5
11.7	9.8	25.5	51.8
8	11.8	17	40.3
10	13.8	24	43.5
9	25	22.3	38.2
16.7	29	23.7	33.3
19.2	24	25.2	41.3
17.8	10.9	19.9	32.6
16.3	10.9	19.3	32.9
15.8	14	20.2	35.9
14.1	10.8	25.1	49.5
11.1	8.7	23.7	50
14.2	12	20.8	31.3
13.3	15.6	28.6	50.6
7.6	11.5	30.5	35
8.6	16.9	25.8	34
9.2	12.7	20.6	39.3
12.6	12	24.5	45
8.9	12.9	23.8	48
12	13	26.2	49
10	11	22.3	50.3
8	12	25.6	45.2

## Sheet: Figure 9K-percentage
NMY-2 puncta at Day 5
	0 puncta(%)	less than 10 puncta(%)	between 10 and 30 puncta(%)	over 30 puncta(%)
WT	12	24	38	26
cup-5(bp510)	16	30	30	24
daf-2(e1370)	74	14	10	2
daf-2cup-5	36	40	16	8
The numerical data are analyzed by GraphPad Prism 6 and represented as a bar graph in Figure 9K.

## Sheet: Figure 9L-daf-2
% of surviving worms
days	WT						daf-2(e1370)			cup-5(bp510)			daf-2cup-5			cpl-1(qx304)			daf-2;cpl-1
0	100	100	100	100	100	100	100	100	100	100	100	100	100	100	100	100	100	100	100	100	100
2	100	100	100	100	100	100	100	100	100	100	100	100	100	94.5946	94.5206	100	86.3636	100	100	100	100
4	100	100	100	100	100	100	100	100	100	95.55	89.8734	92.8571	98.5294	89.1892	90.411	73.913	81.8182	83.0508	100	100	100
6	100	100	100	100	100	100	100	100	100	94.03	84.8101	78.5714	91.1765	60.8108	72.6027	65.2174	68.1818	61.017	92.8571	100	100
8	100	100	100	100	94.33	94.59	100	100	100	89.55	69.6202	78.5714	64.7059	33.7838	57.5343	43.4783	54.5455	49.1525	85.7143	85.5263	82.3529
10	93.38	92.62	96.8	93	90.57	89.19	100	100	100	80.6	62.0253	78.5714	54.4118	22.973	50.6849	26.087	50	38.983	80.3571	81.579	78.4314
12	88.43	85.25	87.2	88	86.79	75.67	100	100	100	74.63	50.6329	57.1429	47.0588	21.6216	49.3151	21.7391	27.2727	30.5085	80.3571	72.3684	60.7843
14	75.2	74.59	80.8	75	78.3	59.46	100	100	95.5556	65.67	24.0506	14.2857	45.5882	18.9189	47.9452	17.3913	22.7273	20.339	75	68.421	54.902
16	44.63	58.2	55.2	43	47.17	35.14	93.8775	89.2857	95.5556	43.28	12.6582	7.14286	42.6471	12.1622	45.2055	8.69565	13.6364	13.5593	64.2857	59.2105	54.902
18	33.06	36.89	34.4	31	30.19	16.22	87.7551	78.5714	93.3333	19.4	3.79747	7.14286	36.7647	12.1622	42.4657	8.69565	9.09091	6.77966	62.5	53.9474	49.0196
20	25.62	18.85	16.8	24	17.92	10.821	87.7551	78.5714	93.3333	7.46	1.26582	7.14286	33.8235	12.1622	36.9863	4.34783	4.54545	3.38983	58.9286	50	47.0588
22	16.53	9.84	11.2	14	14.15	8.11	79.5918	75	88.8889	1.49	1.26582	7.14286	26.4706	10.8108	34.2466	0	0	0	53.5714	43.4211	35.2941
24	14.05	6.56	11.2	12	10.15	8.11	79.5918	75	82.2222	0	0	0	26.4706	8.10811	30.137				51.7857	40.7895	35.2941
26	9.92	6.56	8.8	8	6.6	2.7	65.3061	64.2857	80				22.0588	6.75676	27.3973				50	36.8421	33.3333
28	3.31	4.1	6.4	1	0.943	0	65.3061	64.2857	71.1111				7.35294	5.40541	27.3973				39.2857	34.2105	31.3726
30	2.48	1.64	4	0	0		65.3061	64.2857	64.4444				7.35294	5.40541	26.0274				39.2857	28.9474	27.451
32	0	0	0	0	0		65.3061	64.2857	51.1111				7.35294	4.05405	24.6575				32.1429	23.6842	25.4902
34							57.1429	50	37.7778				5.88235	4.05405	21.9178				28.5714	23.6842	21.5686
36							55.102	50	31.1111				4.41176	1.35135	17.8082				25	23.6842	19.6078
38							53.0612	46.4286	31.1111				4.41176	1.35135	17.8082				21.4286	22.3684	19.6078
40							40.8163	32.1429	24.4444				2.94118	1.35135	15.0685				19.6429	21.0526	17.6471
42							40.8163	32.1429	20				1.47059	1.35135	13.6986				14.2857	21.0526	11.7647
44							32.6531	17.8571	20				0	1.35135	10.9589				14.2857	19.7368	9.80392
46							32.6531	17.8571	20					1.35135	8.21918				10.7143	17.1053	5.88235
48							32.6531	17.8571	15.5556					1.35135	5.47945				10.7143	15.7895	5.88235
50							30.6122	14.2857	15.5556					1.35135	5.47945				10.7143	11.8421	5.88235
52							30.6122	14.2857	15.5556					0	4.10959				8.92857	7.89474	5.88235
54							26.5306	10.7143	8.88889						1.36986				7.14286	3.94737	3.92157
56							26.5306	10.7143	8.88889						0				7.14286	1.31579	3.92157
58							26.5306	10.7143	8.88889										5.35714	0	3.92157
60							24.4898	10.7143	6.66667										0		0
62							20.4082	10.7143	6.66667
64							20.4082	10.7143	6.66667
66							18.3673	10.7143	2.22222
68							16.3265	7.14286	2.22222
70							12.2449	3.57143	0
72							10.2041	3.57143
74							6.12245	3.57143
76							4.08163	0
78							0	0
The numerical data are analyzed by GraphPad Prism 6 and represented as a bar graph in Figure 9L.

## Sheet: Figure 9M-mean lifespan in daf-
				Mean lifespan
				WT			daf-2(e1370)			cup-5(bp510)			daf-2cup-5			cpl-1(qx304)			daf-2;cpl-1
				16.67	18.66	17.94	42.1633	35.9556	36.7857	15.4328	14	14.5714	20.7945	12.6757	17.9412	11.3913	12.3636	11.322	29	26.5789	25.0196
				The numerical data are analyzed by GraphPad Prism 6 and represented as a bar graph in Figure 9M.

## Sheet: Figure 9N-eat-2
		% of surviving worms
	days	WT					eat-2(ad1116)			cup-5(bp510)			eat-2;cup-5			cpl-1(qx304)			eat-2;cpl-1
	0	100	100	100	100	100	100	100	100	100	100	100	100	100	100	100	100	100	100	100	100
	2	100	100	100	100	100	100	100	100	100	100	100	100	94.8718	100	97.6744	100	86.3636	97.6191	100	100
	4	100	100	100	100	100	100	100	95.2381	98	89.8734	92.8571	100	94.8718	100	97.6744	73.913	81.8182	90.4762	98.1482	100
	6	100	100	100	100	100	100	100	100	92	84.8101	78.5714	93.75	89.7436	72.7273	79.0698	65.2174	68.1818	83.3333	92.5926	97.8261
	8	100	100	100	100	94.33	100	100	100	66	69.6202	78.5714	81.25	74.359	63.6364	53.4884	43.4783	54.5455	69.0476	90.7407	97.8261
	10	93.38	92.62	96.8	93	90.57	95.2381	100	100	28	62.0253	78.5714	56.25	56.4103	45.4545	32.5581	26.087	50	59.5238	75.9259	93.4783
	12	88.43	85.25	87.2	88	86.79	92.8571	100	100	14	50.6329	57.1429	35	43.5897	45.4545	18.6046	21.7391	27.2727	50	64.8148	82.6087
	14	75.2	74.59	80.8	75	78.3	80.9524	86.6667	97.2973	10	24.0506	14.2857	28.75	33.3333	27.2727	6.97674	17.3913	22.7273	42.8571	57.4074	58.6957
	16	44.63	58.2	55.2	43	47.17	73.8095	80	97.2973	8	12.6582	7.14286	22.5	23.0769	27.2727	4.65116	8.69565	13.6364	30.9524	42.5926	41.3043
	18	33.06	36.89	34.4	31	30.19	69.0476	80	94.5946	4	3.79747	7.14286	22.5	20.5128	27.2727	4.65116	8.69565	9.09091	16.6667	29.6296	30.4348
	20	25.62	18.85	16.8	24	17.92	66.6667	73.3333	89.1892	4	1.26582	7.14286	16.25	10.2564	9.09091	2.32558	4.34783	4.54545	7.14286	12.963	23.913
	22	16.53	9.84	11.2	14	14.15	61.9048	73.3333	78.3784	2	1.26582	7.14286	8.71	5.12821	5.21	0	0	0	2.38095	11.1111	13.0435
	24	14.05	6.56	11.2	12	10.15	52.3809	73.3333	78.3784	0	0	0	5.29	2.5641	3.46				0	5.55556	6.52174
	26	9.92	6.56	8.8	8	6.6	42.8571	66.6667	70.2703				3.01	0	0					1.85185	0
	28	3.31	4.1	6.4	1	0.943	40.4762	66.6667	64.8649				0							0
	30	2.48	1.64	4	0	0	38.0952	66.6667	59.4595
	32	0	0	0	0	0	33.3333	53.3333	48.6487
	34						28.5714	46.6667	35.1351
	36						23.8095	26.6667	21.6216
	38						16.6667	13.3333	13.5135
	40						7.14286	6.66667	0
	42						4.7619	0
	The numerical data are analyzed by GraphPad Prism 6 and represented as a bar graph in Figure 9N.

## Sheet: Figure 9O-mean lifespan
			Mean lifespan
			WT			eat-2(ad1116)			cup-5(bp510)			eat-2;cup-5			cpl-1(qx304)			eat-2;cpl-1
			16.67	18.58	17.94	22.5714	24	25.8261	12.52	14.5714	14	14.9744	14.125	14.3636	11.9535	12.3636	11.3913	15	17.3818	16.913
			The numerical data are analyzed by GraphPad Prism 6 and represented as a bar graph in Figure 9O.

## Sheet: Figure 9P-isp-1
			% of surviving worms
		days	WT					isp-1(qm150)			cup-5(bp510)			isp-1;cup-5			cpl-1(qx304)				isp-1;cpl-1
		0	100	100	100	100	100	100	100	100	100	100	100	100	100	100	100	100	100	100	100	100	100
		2	100	100	100	100	100	100	100	100	100	100	100	100	100	100	97.6744	100	86.3636	100	100	100	100
		4	100	100	100	100	100	100	99.0991	100	98	89.8734	92.8571	100	100	100	97.6744	73.913	81.8182	100	100	100	100
		6	100	100	100	100	100	100	96.3964	94.8276	92	84.8101	78.5714	93.4426	96.4286	93.5484	79.0698	65.2174	68.1818	98.5915	89.6552	86.4865	86.6667
		8	100	100	100	100	94.33	100	90.991	79.3103	66	69.6202	78.5714	90.1639	78.5714	93.5484	53.4884	43.4783	54.5455	80.2817	72.4138	78.3784	75.5556
		10	93.38	92.62	96.8	93	90.57	98.0769	81.0811	74.1379	28	62.0253	78.5714	81.9672	71.4286	80.6452	32.5581	26.087	50	50.7042	65.5172	67.5676	57.7778
		12	88.43	85.25	87.2	88	86.79	96.1539	75.6757	67.2414	14	50.6329	57.1429	67.2131	60.7143	64.5161	18.6046	21.7391	27.2727	42.2535	51.7241	51.3513	48.8889
		14	75.2	74.59	80.8	75	78.3	96.1539	69.3694	60.3448	10	24.0506	14.2857	50.8197	50	45.1613	6.97674	17.3913	22.7273	26.7606	44.8276	29.7297	37.7778
		16	44.63	58.2	55.2	43	47.17	96.1539	63.0631	50	8	12.6582	7.14286	36.0656	32.1429	35.4839	4.65116	8.69565	13.6364	19.7183	41.3793	16.2162	31.1111
		18	33.06	36.89	34.4	31	30.19	78.8461	56.7568	48.2759	4	3.79747	7.14286	19.6721	17.8571	29.0323	4.65116	8.69565	9.09091	14.0845	24.1379	5.40541	13.3333
		20	25.62	18.85	16.8	24	17.92	65.3846	45.0451	39.6552	4	1.26582	7.14286	6.55738	14.2857	25.8065	2.32558	4.34783	4.54545	7.04225	13.7931	0	6.66667
		22	16.53	9.84	11.2	14	14.15	51.9231	36.9369	32.7586	2	1.26582	7.14286	3.27869	7.14286	6.45161	0	0	0	2.8169	10.3448		2.22222
		24	14.05	6.56	11.2	12	10.15	44.2308	29.7297	24.1379	0	0	0	1.63934	0	0				0			0
		26	9.92	6.56	8.8	8	6.6	26.9231	26.1261	15.5172				0
		28	3.31	4.1	6.4	1	0.943	17.3077	22.5225	10.3448
		30	2.48	1.64	4	0	0	9.61538	14.4144	8.62069
		32	0	0	0	0	0	5.76923	8.10811	6.89655
		34						1.92308	3.6036	3.44828
		36						0	0.900901	1.72414
		38							0	0
		40
		42
				The numerical data are analyzed by GraphPad Prism 6 and represented as a bar graph in Figure 9P.

## Sheet: Figure 9Q-mean lifespan
		Mean lifespan
		WT					isp-1(qm150)					cup-5(bp510)						isp-1;cup-5			cpl-1(qx304)				isp-1;cpl-1
		17.18	18.66	17.94	16.67	18.58	19.0667	22.3964	21.8421			15.04	13	14	14.5714	14	14.5714	15.0164	14.5714	15.4839	12.8451	11.9535	12.3636	11.3913	14.069	12.7027	13.2
			The numerical data are analyzed by GraphPad Prism 6 and represented as a bar graph in Figure 9Q.
